# Supplementary material for: Temporal Expression Dynamics of lncRNAs and Cis-Target Gene Interactions in Leishmania major-Infected Human Macrophages
Source: Preprints.org preprint supplement (doi:10.20944/preprints202411.0262.v1), 2024-11-05
Supplement: Supplementary file 1 [file supplementary]

## Sheet: control-4hpi
lnc_gene	lnc_chromosome	lnc_start	lnc_end	GeneStableID_x	gene_start	gene_end	e	GeneDescription	GeneName
AC006254.1-1	chr3	52823935	52825314	ENSG00000016864	52694488	52706032	-	glycosyltransferase 8 domain containing 1 [Source:HGNC Symbol;Acc:HGNC:24870]	GLT8D1
AC006254.1-1	chr3	52823935	52825314	ENSG00000055955	52812975	52831479	-
AC006254.1-1	chr3	52823935	52825314	ENSG00000055957	52777592	52792068	+
AC006254.1-1	chr3	52823935	52825314	ENSG00000114902	52704955	52711146	+
AC006254.1-1	chr3	52823935	52825314	ENSG00000114904	52708449	52770949	-
AC006254.1-1	chr3	52823935	52825314	ENSG00000162267	52794768	52809009	+	inter-alpha-trypsin inhibitor heavy chain 3 [Source:HGNC Symbol;Acc:HGNC:6168]	ITIH3
AC006254.1-1	chr3	52823935	52825314	ENSG00000163935	52903572	53046750	-
AC006254.1-1	chr3	52823935	52825314	ENSG00000163938	52681156	52694492	+
AC006254.1-1	chr3	52823935	52825314	ENSG00000163939	52545352	52685917	-	polybromo 1 [Source:HGNC Symbol;Acc:HGNC:30064]	PBRM1
AC006254.1-1	chr3	52823935	52825314	ENSG00000168268	52524385	52535054	-
AC006254.1-1	chr3	52823935	52825314	ENSG00000168273	52534013	52579237	+
AC006254.1-1	chr3	52823935	52825314	ENSG00000212452	52692736	52692812	+	small nucleolar RNA, C/D box 69 [Source:HGNC Symbol;Acc:HGNC:32730]	SNORD69
AC006254.1-1	chr3	52823935	52825314	ENSG00000212493	52689248	52689315	+	small nucleolar RNA, C/D box 19 [Source:HGNC Symbol;Acc:HGNC:32717]	SNORD19
AC006254.1-1	chr3	52823935	52825314	ENSG00000213533	52836219	52897596	-
AC006254.1-1	chr3	52823935	52825314	ENSG00000221518	52560570	52560707	+	RNA, U6atac small nuclear 16, pseudogene [Source:HGNC Symbol;Acc:HGNC:46915]	RNU6ATAC16P
AC006254.1-1	chr3	52823935	52825314	ENSG00000222345	52691378	52691453	+	small nucleolar RNA, C/D box 19C [Source:HGNC Symbol;Acc:HGNC:52224]	SNORD19C
AC006254.1-1	chr3	52823935	52825314	ENSG00000238862	52690744	52690827	+	small nucleolar RNA, C/D box 19B [Source:HGNC Symbol;Acc:HGNC:33570]	SNORD19B
AC006254.1-1	chr3	52823935	52825314	ENSG00000239799	52823935	52825314	+	ITIH4 antisense RNA 1 [Source:HGNC Symbol;Acc:HGNC:40310]	ITIH4-AS1
AC006254.1-1	chr3	52823935	52825314	ENSG00000242142	53064283	53065091	-	SERPINE1 mRNA binding protein 1 pseudogene 3 [Source:HGNC Symbol;Acc:HGNC:44630]	SERBP1P3
AC006254.1-1	chr3	52823935	52825314	ENSG00000243696	52813282	52835729	-
AC006254.1-1	chr3	52823935	52825314	ENSG00000248592	52833121	52897562	-	STIMATE-MUSTN1 readthrough [Source:HGNC Symbol;Acc:HGNC:38834]	STIMATE-MUSTN1
AC006254.1-1	chr3	52823935	52825314	ENSG00000252768	52551846	52551943	-	RNA, U6 small nuclear 856, pseudogene [Source:HGNC Symbol;Acc:HGNC:47819]	RNU6-856P
AC006254.1-1	chr3	52823935	52825314	ENSG00000252787	52688890	52688962	+		AC104446.1
AC006254.1-1	chr3	52823935	52825314	ENSG00000270941	52734735	52735013	+	Adenylate kinase isoenzyme 4, mitochondrial, pseudogene	AC006254.2
AC006254.1-1	chr3	52823935	52825314	ENSG00000271137	52753526	52754690	+	AKT interacting protein, pseudogene	AC006254.3
AC006254.1-1	chr3	52823935	52825314	ENSG00000272305	52969119	53099453	-	novel transcript	AC096887.1
AC006254.1-1	chr3	52823935	52825314	ENSG00000272573	52833114	52835219	-
AC006254.1-1	chr3	52823935	52825314	ENSG00000275789	52846463	52846552	-	microRNA 8064 [Source:HGNC Symbol;Acc:HGNC:50236]	MIR8064
AC006254.1-1	chr3	52823935	52825314	ENSG00000275956	52732547	52733867	+	zinc finger protein 610 (ZNF610) pseudogene	AC104446.2
AC006254.1-1	chr3	52823935	52825314	ENSG00000279144	52848085	52848553	-	TEC	AC099667.1
AC006254.1-1	chr3	52823935	52825314	ENSG00000280417	53046166	53048122	+	TEC	AC096887.2
AC006254.1-1	chr3	52823935	52825314	ENSG00000280904	52688882	52688961	+		AC104446.3
AC099489.1-1	chr16	11465260	11473174	ENSG00000122304	11275639	11276480	-
AC099489.1-1	chr16	11465260	11473174	ENSG00000153066	11679080	11742878	-	thioredoxin domain containing 11 [Source:HGNC Symbol;Acc:HGNC:28030]	TXNDC11
AC099489.1-1	chr16	11465260	11473174	ENSG00000175643	11249619	11351762	+
AC099489.1-1	chr16	11465260	11473174	ENSG00000175646	11280836	11281350	-
AC099489.1-1	chr16	11465260	11473174	ENSG00000178257	11273218	11273641	-
AC099489.1-1	chr16	11465260	11473174	ENSG00000178279	11267748	11269533	-
AC099489.1-1	chr16	11465260	11473174	ENSG00000184602	11668414	11679159	+
AC099489.1-1	chr16	11465260	11473174	ENSG00000185338	11254405	11256179	-
AC099489.1-1	chr16	11465260	11473174	ENSG00000188897	11359845	11523588	-
AC099489.1-1	chr16	11465260	11473174	ENSG00000189067	11547722	11636381	-
AC099489.1-1	chr16	11465260	11473174	ENSG00000199668	11315067	11315178	+		AC009121.1
AC099489.1-1	chr16	11465260	11473174	ENSG00000212228	11274113	11274236	-		AC009121.2
AC099489.1-1	chr16	11465260	11473174	ENSG00000221801	11306440	11306527	-	microRNA 548h-2 [Source:HGNC Symbol;Acc:HGNC:35343]	MIR548H2
AC099489.1-1	chr16	11465260	11473174	ENSG00000262420	11741910	11744506	+	novel transcript, antisense to TXNDC11	AC007613.1
AC099489.1-1	chr16	11465260	11473174	ENSG00000262636	11380859	11381118	-	mitochondrial ribosomal protein L18 (MRPL18) pseudogene	AC099489.2
AC099489.1-1	chr16	11465260	11473174	ENSG00000262703	11348143	11349321	-	novel transcript, antisense to RMI2	AC009121.3
AC099489.1-1	chr16	11465260	11473174	ENSG00000262999	11465260	11473174	+	novel transcript, antisense to a novel protein gene	AC099489.3
AC099489.1-1	chr16	11465260	11473174	ENSG00000263033	11196177	11224969	+	novel transcript	AC007220.1
AC099489.1-1	chr16	11465260	11473174	ENSG00000263080	11341809	11345211	-	novel transcript, antisense to RMI2	AC009121.4
AC099489.1-1	chr16	11465260	11473174	ENSG00000263179	11242653	11243552	+	heterogeneous nuclear ribonucleoprotein C pseudogene 4 [Source:HGNC Symbol;Acc:HGNC:48816]	HNRNPCP4
AC099489.1-1	chr16	11465260	11473174	ENSG00000274505	11753666	11753948	-		AC007613.2
ADCK1-1	chr14	77814342	77823637	ENSG00000063761	77800083	77935012	+
ADCK1-1	chr14	77814342	77823637	ENSG00000100601	77672404	77708020	-
ADCK1-1	chr14	77814342	77823637	ENSG00000100603	77717599	77761207	-
ADCK1-1	chr14	77814342	77823637	ENSG00000119705	77708071	77761104	+
ADCK1-1	chr14	77814342	77823637	ENSG00000197734	77760830	77769742	+
ADCK1-1	chr14	77814342	77823637	ENSG00000199440	77821030	77821142	-		AC008372.1
ADCK1-1	chr14	77814342	77823637	ENSG00000239272	77683202	77683989	-	ribosomal protein L21 pseudogene 10 [Source:HGNC Symbol;Acc:HGNC:19795]	RPL21P10
ADCK1-1	chr14	77814342	77823637	ENSG00000240233	77547566	77547846	-	RNA, 7SL, cytoplasmic 587, pseudogene [Source:HGNC Symbol;Acc:HGNC:46603]	RN7SL587P
ADCK1-1	chr14	77814342	77823637	ENSG00000258421	78059942	78060278	-	frataxin pseudogene 1 [Source:HGNC Symbol;Acc:HGNC:20012]	FXNP1
ADCK1-1	chr14	77814342	77823637	ENSG00000258668	77652827	77653055	-	cytochrome c oxidase subunit 6C pseudogene 11 [Source:HGNC Symbol;Acc:HGNC:49363]	COX6CP11
ADCK1-1	chr14	77814342	77823637	ENSG00000258917	77696591	77697377	+	zinc finger MYND-type containing 19 pseudogene 1 [Source:HGNC Symbol;Acc:HGNC:44540]	ZMYND19P1
AKAP13-1	chr15	85619623	85670948	ENSG00000170776	85380571	85749358	+
AKAP13-1	chr15	85619623	85670948	ENSG00000183655	85759323	85795030	-
AKAP13-1	chr15	85619623	85670948	ENSG00000202081	85651522	85651628	-	RNA, U6 small nuclear 1280, pseudogene [Source:HGNC Symbol;Acc:HGNC:48243]	RNU6-1280P
AKAP13-1	chr15	85619623	85670948	ENSG00000221634	85770496	85770578	-	microRNA 1276 [Source:HGNC Symbol;Acc:HGNC:35347]	MIR1276
AKAP13-1	chr15	85619623	85670948	ENSG00000251891	85389823	85389884	-	RNA, U7 small nuclear 79 pseudogene [Source:HGNC Symbol;Acc:HGNC:34175]	RNU7-79P
AKAP13-1	chr15	85619623	85670948	ENSG00000252931	85821855	85821957	+	RNA, U6 small nuclear 231, pseudogene [Source:HGNC Symbol;Acc:HGNC:47194]	RNU6-231P
AKAP13-1	chr15	85619623	85670948	ENSG00000259195	85770990	85771163	+	ribosomal protein S2 (RPS2) pseudogene	AC021739.1
AKAP13-1	chr15	85619623	85670948	ENSG00000259276	85621264	85627689	-	novel transcript, antisense to AKAP13	AC087286.1
AKAP13-1	chr15	85619623	85670948	ENSG00000259367	85619623	85670948	-	novel transcript, antisense to AKAP13	AC087286.2
AKAP13-1	chr15	85619623	85670948	ENSG00000259375	85579046	85580178	-	novel transcript, antisense to AKAP13	AC087286.3
AKAP13-1	chr15	85619623	85670948	ENSG00000259407	85744109	85750281	-	novel transcript, antisense to AKAP13	AC021739.2
AKAP13-1	chr15	85619623	85670948	ENSG00000259416	85754941	85756237	-	long intergenic non-protein coding RNA 2883 [Source:HGNC Symbol;Acc:HGNC:54806]	LINC02883
AKAP13-1	chr15	85619623	85670948	ENSG00000259453	85701109	85702771	+	novel transcript, sense intronic to AKAP13	AC087286.4
AKAP13-1	chr15	85619623	85670948	ENSG00000259544	85726115	85727227	-	novel transcript, antisense to AKAP13	AC021739.3
AKAP13-1	chr15	85619623	85670948	ENSG00000259608	85958717	85958971	-	ADP-ribosylation factor-like 2 binding protein (ARL2BP) pseudogene	AC104229.1
AKAP13-1	chr15	85619623	85670948	ENSG00000259630	85415228	85415633	+	fatty acid binding protein 5 (psoriasis-associated) (FABP5) pseudogene	AC104046.1
AKAP13-1	chr15	85619623	85670948	ENSG00000259762	85750336	85752901	-	novel transcript, antisense to AKAP13	AC021739.4
AKAP13-1	chr15	85619623	85670948	ENSG00000264406	85825635	85825730	+	microRNA 548ap [Source:HGNC Symbol;Acc:HGNC:43465]	MIR548AP
AKAP13-1	chr15	85619623	85670948	ENSG00000284160	85380596	85380662	+	microRNA 7706 [Source:HGNC Symbol;Acc:HGNC:50110]	MIR7706
AKAP2-1	chr9	110170269	110176435	ENSG00000136810	110243811	110256640	-
AKAP2-1	chr9	110170269	110176435	ENSG00000188959	110190048	110208189	-	chromosome 9 open reading frame 152 [Source:HGNC Symbol;Acc:HGNC:31455]	C9orf152
AKAP2-1	chr9	110170269	110176435	ENSG00000204193	110303521	110337884	-
AKAP2-1	chr9	110170269	110176435	ENSG00000206658	110369592	110369698	-	RNA, U6 small nuclear 1039, pseudogene [Source:HGNC Symbol;Acc:HGNC:48002]	RNU6-1039P
AKAP2-1	chr9	110170269	110176435	ENSG00000228053	110024881	110025358	-	ribosomal protein L21 (RPL21) pseudogene	AL158823.1
AKAP2-1	chr9	110170269	110176435	ENSG00000241978	110048598	110172512	+
ANKFY1-1	chr17	4163910	4164713	ENSG00000074370	3923870	3964464	-
ANKFY1-1	chr17	4163910	4164713	ENSG00000074755	4004445	4143020	-
ANKFY1-1	chr17	4163910	4164713	ENSG00000108405	3896592	3916500	-
ANKFY1-1	chr17	4163910	4164713	ENSG00000132388	4269259	4366628	-	ubiquitin conjugating enzyme E2 G1 [Source:HGNC Symbol;Acc:HGNC:12482]	UBE2G1
ANKFY1-1	chr17	4163910	4164713	ENSG00000167740	4143168	4187310	+
ANKFY1-1	chr17	4163910	4164713	ENSG00000185722	4163907	4263977	-
ANKFY1-1	chr17	4163910	4164713	ENSG00000251812	4186326	4186424	+	Y RNA [Source:RFAM;Acc:RF00019]	Y_RNA
ANKFY1-1	chr17	4163910	4164713	ENSG00000252456	4056756	4056876	-	RNA, 5S ribosomal pseudogene 434 [Source:HGNC Symbol;Acc:HGNC:43334]	RNA5SP434
ANKFY1-1	chr17	4163910	4164713	ENSG00000261868	4301372	4302698	+	major facilitator superfamily domain containing 1 pseudogene 1 [Source:HGNC Symbol;Acc:HGNC:50625]	MFSD1P1
ANKFY1-1	chr17	4163910	4164713	ENSG00000263165	4163910	4164713	+	novel transcript, antisense to ANKFY1	AC087292.1
ANKFY1-1	chr17	4163910	4164713	ENSG00000263219	4222091	4223828	+	RYK pseudogene 1 [Source:HGNC Symbol;Acc:HGNC:10482]	RYKP1
ANKFY1-1	chr17	4163910	4164713	ENSG00000263312	3977103	3981899	+	long intergenic non-protein coding RNA 1975 [Source:HGNC Symbol;Acc:HGNC:52802]	LINC01975
ANKFY1-1	chr17	4163910	4164713	ENSG00000263882	4364164	4364453	-	RNA, 7SL, cytoplasmic 774, pseudogene [Source:HGNC Symbol;Acc:HGNC:46790]	RN7SL774P
ANKFY1-1	chr17	4163910	4164713	ENSG00000274363	4267691	4268430	+	novel transcript	AC087742.1
ARHGAP33-1	chr19	35785697	35797871	ENSG00000004776	35754569	35758079	-
ARHGAP33-1	chr19	35785697	35797871	ENSG00000004777	35774532	35788822	+	Rho GTPase activating protein 33 [Source:HGNC Symbol;Acc:HGNC:23085]	ARHGAP33
ARHGAP33-1	chr19	35785697	35797871	ENSG00000011590	35704527	35717038	+
ARHGAP33-1	chr19	35785697	35797871	ENSG00000011600	35904401	35908295	-
ARHGAP33-1	chr19	35785697	35797871	ENSG00000105270	36014660	36033343	-
ARHGAP33-1	chr19	35785697	35797871	ENSG00000105290	35867899	35879791	+
ARHGAP33-1	chr19	35785697	35797871	ENSG00000105668	35666516	35678483	+	uroplakin 1A [Source:HGNC Symbol;Acc:HGNC:12577]	UPK1A
ARHGAP33-1	chr19	35785697	35797871	ENSG00000105672	35641745	35644871	+	ETS variant transcription factor 2 [Source:HGNC Symbol;Acc:HGNC:3491]	ETV2
ARHGAP33-1	chr19	35785697	35797871	ENSG00000105675	35550043	35563658	-
ARHGAP33-1	chr19	35785697	35797871	ENSG00000105677	35545595	35547526	+
ARHGAP33-1	chr19	35785697	35797871	ENSG00000105679	35533412	35545316	+
ARHGAP33-1	chr19	35785697	35797871	ENSG00000126243	35935358	35945767	+
ARHGAP33-1	chr19	35785697	35797871	ENSG00000126246	35738801	35742453	-
ARHGAP33-1	chr19	35785697	35797871	ENSG00000126254	35629030	35637686	+
ARHGAP33-1	chr19	35785697	35797871	ENSG00000126259	35855861	35867109	+
ARHGAP33-1	chr19	35785697	35797871	ENSG00000126264	35902480	35904377	+
ARHGAP33-1	chr19	35785697	35797871	ENSG00000126267	35648223	35658861	+
ARHGAP33-1	chr19	35785697	35797871	ENSG00000161249	35497220	35513658	-
ARHGAP33-1	chr19	35785697	35797871	ENSG00000161265	35742464	35745445	-
ARHGAP33-1	chr19	35785697	35797871	ENSG00000161270	35825964	35869287	-	NPHS1 adhesion molecule, nephrin [Source:HGNC Symbol;Acc:HGNC:7908]	NPHS1
ARHGAP33-1	chr19	35785697	35797871	ENSG00000161277	36034985	36054762	-
ARHGAP33-1	chr19	35785697	35797871	ENSG00000167595	35758143	35771028	+
ARHGAP33-1	chr19	35785697	35797871	ENSG00000167604	35887653	35902303	-	NFKB inhibitor delta [Source:HGNC Symbol;Acc:HGNC:15671]	NFKBID
ARHGAP33-1	chr19	35785697	35797871	ENSG00000181392	36003307	36008793	-
ARHGAP33-1	chr19	35785697	35797871	ENSG00000188223	35745678	35754519	+	novel protein	AD000671.1
ARHGAP33-1	chr19	35785697	35797871	ENSG00000188508	35487324	35495558	-
ARHGAP33-1	chr19	35785697	35797871	ENSG00000189001	35523367	35528351	-
ARHGAP33-1	chr19	35785697	35797871	ENSG00000205138	35995199	35996315	+
ARHGAP33-1	chr19	35785697	35797871	ENSG00000205155	35745114	35747519	+
ARHGAP33-1	chr19	35785697	35797871	ENSG00000224910	35597907	35601501	+
ARHGAP33-1	chr19	35785697	35797871	ENSG00000225872	35785697	35797902	-
ARHGAP33-1	chr19	35785697	35797871	ENSG00000226510	35667948	35673291	-	UPK1A antisense RNA 1 [Source:HGNC Symbol;Acc:HGNC:40603]	UPK1A-AS1
ARHGAP33-1	chr19	35785697	35797871	ENSG00000236144	35540738	35546029	-
ARHGAP33-1	chr19	35785697	35797871	ENSG00000239382	36009120	36014239	-	alkB homolog 6 [Source:HGNC Symbol;Acc:HGNC:28243]	ALKBH6
ARHGAP33-1	chr19	35785697	35797871	ENSG00000243968	35881890	35882153	+	RNA, 7SL, cytoplasmic 402, pseudogene [Source:HGNC Symbol;Acc:HGNC:46418]	RN7SL402P
ARHGAP33-1	chr19	35785697	35797871	ENSG00000248101	36008638	36014235	-	novel transcript	AC002116.1
ARHGAP33-1	chr19	35785697	35797871	ENSG00000249115	35612744	35625349	+
ARHGAP33-1	chr19	35785697	35797871	ENSG00000250799	35799988	35813299	-
ARHGAP33-1	chr19	35785697	35797871	ENSG00000267049	35769144	35771028	-	novel transcript	AC002398.1
ARHGAP33-1	chr19	35785697	35797871	ENSG00000267113	35957121	35957382	-	LYR motif containing 2 (LYRM2) pseudogene	AF038458.1
ARHGAP33-1	chr19	35785697	35797871	ENSG00000267120	35739252	35745432	-	novel transcript	AD000671.2
ARHGAP33-1	chr19	35785697	35797871	ENSG00000267190	35683778	35684201	-	thymidylate synthetase pseudogene 2 [Source:HGNC Symbol;Acc:HGNC:52352]	TYMSP2
ARHGAP33-1	chr19	35785697	35797871	ENSG00000267328	35754566	35755490	+	novel transcript	AC002398.2
ARHGAP33-1	chr19	35785697	35797871	ENSG00000267388	35960512	35964063	+	novel transcript	AF038458.2
ARHGAP33-1	chr19	35785697	35797871	ENSG00000267439	35747057	35753415	-	novel transcript	AD000671.3
ARHGAP33-1	chr19	35785697	35797871	ENSG00000267626	35608285	35612666	-	novel transcript	AC002115.1
ARHGAP33-1	chr19	35785697	35797871	ENSG00000267698	36014508	36045972	+	uncharacterized LOC101927572 [Source:NCBI gene (formerly Entrezgene);Acc:101927572]	AC002116.2
ARHGAP33-1	chr19	35785697	35797871	ENSG00000267786	35947115	35959192	+	novel transcript	AF038458.3
ARHGAP33-1	chr19	35785697	35797871	ENSG00000267796	35748361	35754519	+
ARHGAP33-1	chr19	35785697	35797871	ENSG00000272333	35718019	35738878	+
ARHGAP33-1	chr19	35785697	35797871	ENSG00000280023	36070239	36071070	+	TEC	AD000813.1
ARHGAP33-1	chr19	35785697	35797871	ENSG00000280194	35901561	35903855	-	novel transcript	AD000864.1
ARHGAP33-1	chr19	35785697	35797871	ENSG00000283758	35586260	35587296	+
ARHGAP33-1	chr19	35785697	35797871	ENSG00000283907	35557956	35581954	+	novel transcript, antisense to ATP4A	AD000090.1
ARHGAP33-1	chr19	35788874	35792674	ENSG00000004776	35754569	35758079	-
ARHGAP33-1	chr19	35788874	35792674	ENSG00000004777	35774532	35788822	+	Rho GTPase activating protein 33 [Source:HGNC Symbol;Acc:HGNC:23085]	ARHGAP33
ARHGAP33-1	chr19	35788874	35792674	ENSG00000011590	35704527	35717038	+
ARHGAP33-1	chr19	35788874	35792674	ENSG00000011600	35904401	35908295	-
ARHGAP33-1	chr19	35788874	35792674	ENSG00000105270	36014660	36033343	-
ARHGAP33-1	chr19	35788874	35792674	ENSG00000105290	35867899	35879791	+
ARHGAP33-1	chr19	35788874	35792674	ENSG00000105668	35666516	35678483	+	uroplakin 1A [Source:HGNC Symbol;Acc:HGNC:12577]	UPK1A
ARHGAP33-1	chr19	35788874	35792674	ENSG00000105672	35641745	35644871	+	ETS variant transcription factor 2 [Source:HGNC Symbol;Acc:HGNC:3491]	ETV2
ARHGAP33-1	chr19	35788874	35792674	ENSG00000105675	35550043	35563658	-
ARHGAP33-1	chr19	35788874	35792674	ENSG00000105677	35545595	35547526	+
ARHGAP33-1	chr19	35788874	35792674	ENSG00000105679	35533412	35545316	+
ARHGAP33-1	chr19	35788874	35792674	ENSG00000126243	35935358	35945767	+
ARHGAP33-1	chr19	35788874	35792674	ENSG00000126246	35738801	35742453	-
ARHGAP33-1	chr19	35788874	35792674	ENSG00000126254	35629030	35637686	+
ARHGAP33-1	chr19	35788874	35792674	ENSG00000126259	35855861	35867109	+
ARHGAP33-1	chr19	35788874	35792674	ENSG00000126264	35902480	35904377	+
ARHGAP33-1	chr19	35788874	35792674	ENSG00000126267	35648223	35658861	+
ARHGAP33-1	chr19	35788874	35792674	ENSG00000161249	35497220	35513658	-
ARHGAP33-1	chr19	35788874	35792674	ENSG00000161265	35742464	35745445	-
ARHGAP33-1	chr19	35788874	35792674	ENSG00000161270	35825964	35869287	-	NPHS1 adhesion molecule, nephrin [Source:HGNC Symbol;Acc:HGNC:7908]	NPHS1
ARHGAP33-1	chr19	35788874	35792674	ENSG00000161277	36034985	36054762	-
ARHGAP33-1	chr19	35788874	35792674	ENSG00000167595	35758143	35771028	+
ARHGAP33-1	chr19	35788874	35792674	ENSG00000167604	35887653	35902303	-	NFKB inhibitor delta [Source:HGNC Symbol;Acc:HGNC:15671]	NFKBID
ARHGAP33-1	chr19	35788874	35792674	ENSG00000181392	36003307	36008793	-
ARHGAP33-1	chr19	35788874	35792674	ENSG00000188223	35745678	35754519	+	novel protein	AD000671.1
ARHGAP33-1	chr19	35788874	35792674	ENSG00000189001	35523367	35528351	-
ARHGAP33-1	chr19	35788874	35792674	ENSG00000205138	35995199	35996315	+
ARHGAP33-1	chr19	35788874	35792674	ENSG00000205155	35745114	35747519	+
ARHGAP33-1	chr19	35788874	35792674	ENSG00000224910	35597907	35601501	+
ARHGAP33-1	chr19	35788874	35792674	ENSG00000225872	35785697	35797902	-
ARHGAP33-1	chr19	35788874	35792674	ENSG00000226510	35667948	35673291	-	UPK1A antisense RNA 1 [Source:HGNC Symbol;Acc:HGNC:40603]	UPK1A-AS1
ARHGAP33-1	chr19	35788874	35792674	ENSG00000236144	35540738	35546029	-
ARHGAP33-1	chr19	35788874	35792674	ENSG00000239382	36009120	36014239	-	alkB homolog 6 [Source:HGNC Symbol;Acc:HGNC:28243]	ALKBH6
ARHGAP33-1	chr19	35788874	35792674	ENSG00000243968	35881890	35882153	+	RNA, 7SL, cytoplasmic 402, pseudogene [Source:HGNC Symbol;Acc:HGNC:46418]	RN7SL402P
ARHGAP33-1	chr19	35788874	35792674	ENSG00000248101	36008638	36014235	-	novel transcript	AC002116.1
ARHGAP33-1	chr19	35788874	35792674	ENSG00000249115	35612744	35625349	+
ARHGAP33-1	chr19	35788874	35792674	ENSG00000250799	35799988	35813299	-
ARHGAP33-1	chr19	35788874	35792674	ENSG00000267049	35769144	35771028	-	novel transcript	AC002398.1
ARHGAP33-1	chr19	35788874	35792674	ENSG00000267113	35957121	35957382	-	LYR motif containing 2 (LYRM2) pseudogene	AF038458.1
ARHGAP33-1	chr19	35788874	35792674	ENSG00000267120	35739252	35745432	-	novel transcript	AD000671.2
ARHGAP33-1	chr19	35788874	35792674	ENSG00000267190	35683778	35684201	-	thymidylate synthetase pseudogene 2 [Source:HGNC Symbol;Acc:HGNC:52352]	TYMSP2
ARHGAP33-1	chr19	35788874	35792674	ENSG00000267328	35754566	35755490	+	novel transcript	AC002398.2
ARHGAP33-1	chr19	35788874	35792674	ENSG00000267388	35960512	35964063	+	novel transcript	AF038458.2
ARHGAP33-1	chr19	35788874	35792674	ENSG00000267439	35747057	35753415	-	novel transcript	AD000671.3
ARHGAP33-1	chr19	35788874	35792674	ENSG00000267626	35608285	35612666	-	novel transcript	AC002115.1
ARHGAP33-1	chr19	35788874	35792674	ENSG00000267698	36014508	36045972	+	uncharacterized LOC101927572 [Source:NCBI gene (formerly Entrezgene);Acc:101927572]	AC002116.2
ARHGAP33-1	chr19	35788874	35792674	ENSG00000267786	35947115	35959192	+	novel transcript	AF038458.3
ARHGAP33-1	chr19	35788874	35792674	ENSG00000267796	35748361	35754519	+
ARHGAP33-1	chr19	35788874	35792674	ENSG00000272333	35718019	35738878	+
ARHGAP33-1	chr19	35788874	35792674	ENSG00000280023	36070239	36071070	+	TEC	AD000813.1
ARHGAP33-1	chr19	35788874	35792674	ENSG00000280194	35901561	35903855	-	novel transcript	AD000864.1
ARHGAP33-1	chr19	35788874	35792674	ENSG00000283758	35586260	35587296	+
ARHGAP33-1	chr19	35788874	35792674	ENSG00000283907	35557956	35581954	+	novel transcript, antisense to ATP4A	AD000090.1
ARHGAP33-1	chr19	35788874	35796907	ENSG00000004776	35754569	35758079	-
ARHGAP33-1	chr19	35788874	35796907	ENSG00000004777	35774532	35788822	+	Rho GTPase activating protein 33 [Source:HGNC Symbol;Acc:HGNC:23085]	ARHGAP33
ARHGAP33-1	chr19	35788874	35796907	ENSG00000011590	35704527	35717038	+
ARHGAP33-1	chr19	35788874	35796907	ENSG00000011600	35904401	35908295	-
ARHGAP33-1	chr19	35788874	35796907	ENSG00000105270	36014660	36033343	-
ARHGAP33-1	chr19	35788874	35796907	ENSG00000105290	35867899	35879791	+
ARHGAP33-1	chr19	35788874	35796907	ENSG00000105668	35666516	35678483	+	uroplakin 1A [Source:HGNC Symbol;Acc:HGNC:12577]	UPK1A
ARHGAP33-1	chr19	35788874	35796907	ENSG00000105672	35641745	35644871	+	ETS variant transcription factor 2 [Source:HGNC Symbol;Acc:HGNC:3491]	ETV2
ARHGAP33-1	chr19	35788874	35796907	ENSG00000105675	35550043	35563658	-
ARHGAP33-1	chr19	35788874	35796907	ENSG00000105677	35545595	35547526	+
ARHGAP33-1	chr19	35788874	35796907	ENSG00000105679	35533412	35545316	+
ARHGAP33-1	chr19	35788874	35796907	ENSG00000126243	35935358	35945767	+
ARHGAP33-1	chr19	35788874	35796907	ENSG00000126246	35738801	35742453	-
ARHGAP33-1	chr19	35788874	35796907	ENSG00000126254	35629030	35637686	+
ARHGAP33-1	chr19	35788874	35796907	ENSG00000126259	35855861	35867109	+
ARHGAP33-1	chr19	35788874	35796907	ENSG00000126264	35902480	35904377	+
ARHGAP33-1	chr19	35788874	35796907	ENSG00000126267	35648223	35658861	+
ARHGAP33-1	chr19	35788874	35796907	ENSG00000161249	35497220	35513658	-
ARHGAP33-1	chr19	35788874	35796907	ENSG00000161265	35742464	35745445	-
ARHGAP33-1	chr19	35788874	35796907	ENSG00000161270	35825964	35869287	-	NPHS1 adhesion molecule, nephrin [Source:HGNC Symbol;Acc:HGNC:7908]	NPHS1
ARHGAP33-1	chr19	35788874	35796907	ENSG00000161277	36034985	36054762	-
ARHGAP33-1	chr19	35788874	35796907	ENSG00000167595	35758143	35771028	+
ARHGAP33-1	chr19	35788874	35796907	ENSG00000167604	35887653	35902303	-	NFKB inhibitor delta [Source:HGNC Symbol;Acc:HGNC:15671]	NFKBID
ARHGAP33-1	chr19	35788874	35796907	ENSG00000181392	36003307	36008793	-
ARHGAP33-1	chr19	35788874	35796907	ENSG00000188223	35745678	35754519	+	novel protein	AD000671.1
ARHGAP33-1	chr19	35788874	35796907	ENSG00000189001	35523367	35528351	-
ARHGAP33-1	chr19	35788874	35796907	ENSG00000205138	35995199	35996315	+
ARHGAP33-1	chr19	35788874	35796907	ENSG00000205155	35745114	35747519	+
ARHGAP33-1	chr19	35788874	35796907	ENSG00000224910	35597907	35601501	+
ARHGAP33-1	chr19	35788874	35796907	ENSG00000225872	35785697	35797902	-
ARHGAP33-1	chr19	35788874	35796907	ENSG00000226510	35667948	35673291	-	UPK1A antisense RNA 1 [Source:HGNC Symbol;Acc:HGNC:40603]	UPK1A-AS1
ARHGAP33-1	chr19	35788874	35796907	ENSG00000236144	35540738	35546029	-
ARHGAP33-1	chr19	35788874	35796907	ENSG00000239382	36009120	36014239	-	alkB homolog 6 [Source:HGNC Symbol;Acc:HGNC:28243]	ALKBH6
ARHGAP33-1	chr19	35788874	35796907	ENSG00000243968	35881890	35882153	+	RNA, 7SL, cytoplasmic 402, pseudogene [Source:HGNC Symbol;Acc:HGNC:46418]	RN7SL402P
ARHGAP33-1	chr19	35788874	35796907	ENSG00000248101	36008638	36014235	-	novel transcript	AC002116.1
ARHGAP33-1	chr19	35788874	35796907	ENSG00000249115	35612744	35625349	+
ARHGAP33-1	chr19	35788874	35796907	ENSG00000250799	35799988	35813299	-
ARHGAP33-1	chr19	35788874	35796907	ENSG00000267049	35769144	35771028	-	novel transcript	AC002398.1
ARHGAP33-1	chr19	35788874	35796907	ENSG00000267113	35957121	35957382	-	LYR motif containing 2 (LYRM2) pseudogene	AF038458.1
ARHGAP33-1	chr19	35788874	35796907	ENSG00000267120	35739252	35745432	-	novel transcript	AD000671.2
ARHGAP33-1	chr19	35788874	35796907	ENSG00000267190	35683778	35684201	-	thymidylate synthetase pseudogene 2 [Source:HGNC Symbol;Acc:HGNC:52352]	TYMSP2
ARHGAP33-1	chr19	35788874	35796907	ENSG00000267328	35754566	35755490	+	novel transcript	AC002398.2
ARHGAP33-1	chr19	35788874	35796907	ENSG00000267388	35960512	35964063	+	novel transcript	AF038458.2
ARHGAP33-1	chr19	35788874	35796907	ENSG00000267439	35747057	35753415	-	novel transcript	AD000671.3
ARHGAP33-1	chr19	35788874	35796907	ENSG00000267626	35608285	35612666	-	novel transcript	AC002115.1
ARHGAP33-1	chr19	35788874	35796907	ENSG00000267698	36014508	36045972	+	uncharacterized LOC101927572 [Source:NCBI gene (formerly Entrezgene);Acc:101927572]	AC002116.2
ARHGAP33-1	chr19	35788874	35796907	ENSG00000267786	35947115	35959192	+	novel transcript	AF038458.3
ARHGAP33-1	chr19	35788874	35796907	ENSG00000267796	35748361	35754519	+
ARHGAP33-1	chr19	35788874	35796907	ENSG00000272333	35718019	35738878	+
ARHGAP33-1	chr19	35788874	35796907	ENSG00000280023	36070239	36071070	+	TEC	AD000813.1
ARHGAP33-1	chr19	35788874	35796907	ENSG00000280194	35901561	35903855	-	novel transcript	AD000864.1
ARHGAP33-1	chr19	35788874	35796907	ENSG00000283758	35586260	35587296	+
ARHGAP33-1	chr19	35788874	35796907	ENSG00000283907	35557956	35581954	+	novel transcript, antisense to ATP4A	AD000090.1
ARHGAP33-1	chr19	35788876	35797909	ENSG00000004776	35754569	35758079	-
ARHGAP33-1	chr19	35788876	35797909	ENSG00000004777	35774532	35788822	+	Rho GTPase activating protein 33 [Source:HGNC Symbol;Acc:HGNC:23085]	ARHGAP33
ARHGAP33-1	chr19	35788876	35797909	ENSG00000011590	35704527	35717038	+
ARHGAP33-1	chr19	35788876	35797909	ENSG00000011600	35904401	35908295	-
ARHGAP33-1	chr19	35788876	35797909	ENSG00000105270	36014660	36033343	-
ARHGAP33-1	chr19	35788876	35797909	ENSG00000105290	35867899	35879791	+
ARHGAP33-1	chr19	35788876	35797909	ENSG00000105668	35666516	35678483	+	uroplakin 1A [Source:HGNC Symbol;Acc:HGNC:12577]	UPK1A
ARHGAP33-1	chr19	35788876	35797909	ENSG00000105672	35641745	35644871	+	ETS variant transcription factor 2 [Source:HGNC Symbol;Acc:HGNC:3491]	ETV2
ARHGAP33-1	chr19	35788876	35797909	ENSG00000105675	35550043	35563658	-
ARHGAP33-1	chr19	35788876	35797909	ENSG00000105677	35545595	35547526	+
ARHGAP33-1	chr19	35788876	35797909	ENSG00000105679	35533412	35545316	+
ARHGAP33-1	chr19	35788876	35797909	ENSG00000126243	35935358	35945767	+
ARHGAP33-1	chr19	35788876	35797909	ENSG00000126246	35738801	35742453	-
ARHGAP33-1	chr19	35788876	35797909	ENSG00000126254	35629030	35637686	+
ARHGAP33-1	chr19	35788876	35797909	ENSG00000126259	35855861	35867109	+
ARHGAP33-1	chr19	35788876	35797909	ENSG00000126264	35902480	35904377	+
ARHGAP33-1	chr19	35788876	35797909	ENSG00000126267	35648223	35658861	+
ARHGAP33-1	chr19	35788876	35797909	ENSG00000161249	35497220	35513658	-
ARHGAP33-1	chr19	35788876	35797909	ENSG00000161265	35742464	35745445	-
ARHGAP33-1	chr19	35788876	35797909	ENSG00000161270	35825964	35869287	-	NPHS1 adhesion molecule, nephrin [Source:HGNC Symbol;Acc:HGNC:7908]	NPHS1
ARHGAP33-1	chr19	35788876	35797909	ENSG00000161277	36034985	36054762	-
ARHGAP33-1	chr19	35788876	35797909	ENSG00000167595	35758143	35771028	+
ARHGAP33-1	chr19	35788876	35797909	ENSG00000167604	35887653	35902303	-	NFKB inhibitor delta [Source:HGNC Symbol;Acc:HGNC:15671]	NFKBID
ARHGAP33-1	chr19	35788876	35797909	ENSG00000181392	36003307	36008793	-
ARHGAP33-1	chr19	35788876	35797909	ENSG00000188223	35745678	35754519	+	novel protein	AD000671.1
ARHGAP33-1	chr19	35788876	35797909	ENSG00000189001	35523367	35528351	-
ARHGAP33-1	chr19	35788876	35797909	ENSG00000205138	35995199	35996315	+
ARHGAP33-1	chr19	35788876	35797909	ENSG00000205155	35745114	35747519	+
ARHGAP33-1	chr19	35788876	35797909	ENSG00000224910	35597907	35601501	+
ARHGAP33-1	chr19	35788876	35797909	ENSG00000225872	35785697	35797902	-
ARHGAP33-1	chr19	35788876	35797909	ENSG00000226510	35667948	35673291	-	UPK1A antisense RNA 1 [Source:HGNC Symbol;Acc:HGNC:40603]	UPK1A-AS1
ARHGAP33-1	chr19	35788876	35797909	ENSG00000236144	35540738	35546029	-
ARHGAP33-1	chr19	35788876	35797909	ENSG00000239382	36009120	36014239	-	alkB homolog 6 [Source:HGNC Symbol;Acc:HGNC:28243]	ALKBH6
ARHGAP33-1	chr19	35788876	35797909	ENSG00000243968	35881890	35882153	+	RNA, 7SL, cytoplasmic 402, pseudogene [Source:HGNC Symbol;Acc:HGNC:46418]	RN7SL402P
ARHGAP33-1	chr19	35788876	35797909	ENSG00000248101	36008638	36014235	-	novel transcript	AC002116.1
ARHGAP33-1	chr19	35788876	35797909	ENSG00000249115	35612744	35625349	+
ARHGAP33-1	chr19	35788876	35797909	ENSG00000250799	35799988	35813299	-
ARHGAP33-1	chr19	35788876	35797909	ENSG00000267049	35769144	35771028	-	novel transcript	AC002398.1
ARHGAP33-1	chr19	35788876	35797909	ENSG00000267113	35957121	35957382	-	LYR motif containing 2 (LYRM2) pseudogene	AF038458.1
ARHGAP33-1	chr19	35788876	35797909	ENSG00000267120	35739252	35745432	-	novel transcript	AD000671.2
ARHGAP33-1	chr19	35788876	35797909	ENSG00000267190	35683778	35684201	-	thymidylate synthetase pseudogene 2 [Source:HGNC Symbol;Acc:HGNC:52352]	TYMSP2
ARHGAP33-1	chr19	35788876	35797909	ENSG00000267328	35754566	35755490	+	novel transcript	AC002398.2
ARHGAP33-1	chr19	35788876	35797909	ENSG00000267388	35960512	35964063	+	novel transcript	AF038458.2
ARHGAP33-1	chr19	35788876	35797909	ENSG00000267439	35747057	35753415	-	novel transcript	AD000671.3
ARHGAP33-1	chr19	35788876	35797909	ENSG00000267626	35608285	35612666	-	novel transcript	AC002115.1
ARHGAP33-1	chr19	35788876	35797909	ENSG00000267698	36014508	36045972	+	uncharacterized LOC101927572 [Source:NCBI gene (formerly Entrezgene);Acc:101927572]	AC002116.2
ARHGAP33-1	chr19	35788876	35797909	ENSG00000267786	35947115	35959192	+	novel transcript	AF038458.3
ARHGAP33-1	chr19	35788876	35797909	ENSG00000267796	35748361	35754519	+
ARHGAP33-1	chr19	35788876	35797909	ENSG00000272333	35718019	35738878	+
ARHGAP33-1	chr19	35788876	35797909	ENSG00000280023	36070239	36071070	+	TEC	AD000813.1
ARHGAP33-1	chr19	35788876	35797909	ENSG00000280194	35901561	35903855	-	novel transcript	AD000864.1
ARHGAP33-1	chr19	35788876	35797909	ENSG00000283758	35586260	35587296	+
ARHGAP33-1	chr19	35788876	35797909	ENSG00000283907	35557956	35581954	+	novel transcript, antisense to ATP4A	AD000090.1
ARHGAP33-1	chr19	35789716	35797902	ENSG00000004776	35754569	35758079	-
ARHGAP33-1	chr19	35789716	35797902	ENSG00000004777	35774532	35788822	+	Rho GTPase activating protein 33 [Source:HGNC Symbol;Acc:HGNC:23085]	ARHGAP33
ARHGAP33-1	chr19	35789716	35797902	ENSG00000011590	35704527	35717038	+
ARHGAP33-1	chr19	35789716	35797902	ENSG00000011600	35904401	35908295	-
ARHGAP33-1	chr19	35789716	35797902	ENSG00000105270	36014660	36033343	-
ARHGAP33-1	chr19	35789716	35797902	ENSG00000105290	35867899	35879791	+
ARHGAP33-1	chr19	35789716	35797902	ENSG00000105668	35666516	35678483	+	uroplakin 1A [Source:HGNC Symbol;Acc:HGNC:12577]	UPK1A
ARHGAP33-1	chr19	35789716	35797902	ENSG00000105672	35641745	35644871	+	ETS variant transcription factor 2 [Source:HGNC Symbol;Acc:HGNC:3491]	ETV2
ARHGAP33-1	chr19	35789716	35797902	ENSG00000105675	35550043	35563658	-
ARHGAP33-1	chr19	35789716	35797902	ENSG00000105677	35545595	35547526	+
ARHGAP33-1	chr19	35789716	35797902	ENSG00000105679	35533412	35545316	+
ARHGAP33-1	chr19	35789716	35797902	ENSG00000126243	35935358	35945767	+
ARHGAP33-1	chr19	35789716	35797902	ENSG00000126246	35738801	35742453	-
ARHGAP33-1	chr19	35789716	35797902	ENSG00000126254	35629030	35637686	+
ARHGAP33-1	chr19	35789716	35797902	ENSG00000126259	35855861	35867109	+
ARHGAP33-1	chr19	35789716	35797902	ENSG00000126264	35902480	35904377	+
ARHGAP33-1	chr19	35789716	35797902	ENSG00000126267	35648223	35658861	+
ARHGAP33-1	chr19	35789716	35797902	ENSG00000161249	35497220	35513658	-
ARHGAP33-1	chr19	35789716	35797902	ENSG00000161265	35742464	35745445	-
ARHGAP33-1	chr19	35789716	35797902	ENSG00000161270	35825964	35869287	-	NPHS1 adhesion molecule, nephrin [Source:HGNC Symbol;Acc:HGNC:7908]	NPHS1
ARHGAP33-1	chr19	35789716	35797902	ENSG00000161277	36034985	36054762	-
ARHGAP33-1	chr19	35789716	35797902	ENSG00000167595	35758143	35771028	+
ARHGAP33-1	chr19	35789716	35797902	ENSG00000167604	35887653	35902303	-	NFKB inhibitor delta [Source:HGNC Symbol;Acc:HGNC:15671]	NFKBID
ARHGAP33-1	chr19	35789716	35797902	ENSG00000181392	36003307	36008793	-
ARHGAP33-1	chr19	35789716	35797902	ENSG00000188223	35745678	35754519	+	novel protein	AD000671.1
ARHGAP33-1	chr19	35789716	35797902	ENSG00000189001	35523367	35528351	-
ARHGAP33-1	chr19	35789716	35797902	ENSG00000205138	35995199	35996315	+
ARHGAP33-1	chr19	35789716	35797902	ENSG00000205155	35745114	35747519	+
ARHGAP33-1	chr19	35789716	35797902	ENSG00000224910	35597907	35601501	+
ARHGAP33-1	chr19	35789716	35797902	ENSG00000225872	35785697	35797902	-
ARHGAP33-1	chr19	35789716	35797902	ENSG00000226510	35667948	35673291	-	UPK1A antisense RNA 1 [Source:HGNC Symbol;Acc:HGNC:40603]	UPK1A-AS1
ARHGAP33-1	chr19	35789716	35797902	ENSG00000236144	35540738	35546029	-
ARHGAP33-1	chr19	35789716	35797902	ENSG00000239382	36009120	36014239	-	alkB homolog 6 [Source:HGNC Symbol;Acc:HGNC:28243]	ALKBH6
ARHGAP33-1	chr19	35789716	35797902	ENSG00000243968	35881890	35882153	+	RNA, 7SL, cytoplasmic 402, pseudogene [Source:HGNC Symbol;Acc:HGNC:46418]	RN7SL402P
ARHGAP33-1	chr19	35789716	35797902	ENSG00000248101	36008638	36014235	-	novel transcript	AC002116.1
ARHGAP33-1	chr19	35789716	35797902	ENSG00000249115	35612744	35625349	+
ARHGAP33-1	chr19	35789716	35797902	ENSG00000250799	35799988	35813299	-
ARHGAP33-1	chr19	35789716	35797902	ENSG00000267049	35769144	35771028	-	novel transcript	AC002398.1
ARHGAP33-1	chr19	35789716	35797902	ENSG00000267113	35957121	35957382	-	LYR motif containing 2 (LYRM2) pseudogene	AF038458.1
ARHGAP33-1	chr19	35789716	35797902	ENSG00000267120	35739252	35745432	-	novel transcript	AD000671.2
ARHGAP33-1	chr19	35789716	35797902	ENSG00000267190	35683778	35684201	-	thymidylate synthetase pseudogene 2 [Source:HGNC Symbol;Acc:HGNC:52352]	TYMSP2
ARHGAP33-1	chr19	35789716	35797902	ENSG00000267328	35754566	35755490	+	novel transcript	AC002398.2
ARHGAP33-1	chr19	35789716	35797902	ENSG00000267388	35960512	35964063	+	novel transcript	AF038458.2
ARHGAP33-1	chr19	35789716	35797902	ENSG00000267439	35747057	35753415	-	novel transcript	AD000671.3
ARHGAP33-1	chr19	35789716	35797902	ENSG00000267626	35608285	35612666	-	novel transcript	AC002115.1
ARHGAP33-1	chr19	35789716	35797902	ENSG00000267698	36014508	36045972	+	uncharacterized LOC101927572 [Source:NCBI gene (formerly Entrezgene);Acc:101927572]	AC002116.2
ARHGAP33-1	chr19	35789716	35797902	ENSG00000267786	35947115	35959192	+	novel transcript	AF038458.3
ARHGAP33-1	chr19	35789716	35797902	ENSG00000267796	35748361	35754519	+
ARHGAP33-1	chr19	35789716	35797902	ENSG00000272333	35718019	35738878	+
ARHGAP33-1	chr19	35789716	35797902	ENSG00000280023	36070239	36071070	+	TEC	AD000813.1
ARHGAP33-1	chr19	35789716	35797902	ENSG00000280194	35901561	35903855	-	novel transcript	AD000864.1
ARHGAP33-1	chr19	35789716	35797902	ENSG00000283758	35586260	35587296	+
ARHGAP33-1	chr19	35789716	35797902	ENSG00000283907	35557956	35581954	+	novel transcript, antisense to ATP4A	AD000090.1
ARHGAP33-1	chr19	35791103	35797902	ENSG00000004776	35754569	35758079	-
ARHGAP33-1	chr19	35791103	35797902	ENSG00000004777	35774532	35788822	+	Rho GTPase activating protein 33 [Source:HGNC Symbol;Acc:HGNC:23085]	ARHGAP33
ARHGAP33-1	chr19	35791103	35797902	ENSG00000011590	35704527	35717038	+
ARHGAP33-1	chr19	35791103	35797902	ENSG00000011600	35904401	35908295	-
ARHGAP33-1	chr19	35791103	35797902	ENSG00000105270	36014660	36033343	-
ARHGAP33-1	chr19	35791103	35797902	ENSG00000105290	35867899	35879791	+
ARHGAP33-1	chr19	35791103	35797902	ENSG00000105668	35666516	35678483	+	uroplakin 1A [Source:HGNC Symbol;Acc:HGNC:12577]	UPK1A
ARHGAP33-1	chr19	35791103	35797902	ENSG00000105672	35641745	35644871	+	ETS variant transcription factor 2 [Source:HGNC Symbol;Acc:HGNC:3491]	ETV2
ARHGAP33-1	chr19	35791103	35797902	ENSG00000105675	35550043	35563658	-
ARHGAP33-1	chr19	35791103	35797902	ENSG00000105677	35545595	35547526	+
ARHGAP33-1	chr19	35791103	35797902	ENSG00000105679	35533412	35545316	+
ARHGAP33-1	chr19	35791103	35797902	ENSG00000126243	35935358	35945767	+
ARHGAP33-1	chr19	35791103	35797902	ENSG00000126246	35738801	35742453	-
ARHGAP33-1	chr19	35791103	35797902	ENSG00000126254	35629030	35637686	+
ARHGAP33-1	chr19	35791103	35797902	ENSG00000126259	35855861	35867109	+
ARHGAP33-1	chr19	35791103	35797902	ENSG00000126264	35902480	35904377	+
ARHGAP33-1	chr19	35791103	35797902	ENSG00000126267	35648223	35658861	+
ARHGAP33-1	chr19	35791103	35797902	ENSG00000161249	35497220	35513658	-
ARHGAP33-1	chr19	35791103	35797902	ENSG00000161265	35742464	35745445	-
ARHGAP33-1	chr19	35791103	35797902	ENSG00000161270	35825964	35869287	-	NPHS1 adhesion molecule, nephrin [Source:HGNC Symbol;Acc:HGNC:7908]	NPHS1
ARHGAP33-1	chr19	35791103	35797902	ENSG00000161277	36034985	36054762	-
ARHGAP33-1	chr19	35791103	35797902	ENSG00000167595	35758143	35771028	+
ARHGAP33-1	chr19	35791103	35797902	ENSG00000167604	35887653	35902303	-	NFKB inhibitor delta [Source:HGNC Symbol;Acc:HGNC:15671]	NFKBID
ARHGAP33-1	chr19	35791103	35797902	ENSG00000181392	36003307	36008793	-
ARHGAP33-1	chr19	35791103	35797902	ENSG00000188223	35745678	35754519	+	novel protein	AD000671.1
ARHGAP33-1	chr19	35791103	35797902	ENSG00000189001	35523367	35528351	-
ARHGAP33-1	chr19	35791103	35797902	ENSG00000205138	35995199	35996315	+
ARHGAP33-1	chr19	35791103	35797902	ENSG00000205155	35745114	35747519	+
ARHGAP33-1	chr19	35791103	35797902	ENSG00000224910	35597907	35601501	+
ARHGAP33-1	chr19	35791103	35797902	ENSG00000225872	35785697	35797902	-
ARHGAP33-1	chr19	35791103	35797902	ENSG00000226510	35667948	35673291	-	UPK1A antisense RNA 1 [Source:HGNC Symbol;Acc:HGNC:40603]	UPK1A-AS1
ARHGAP33-1	chr19	35791103	35797902	ENSG00000236144	35540738	35546029	-
ARHGAP33-1	chr19	35791103	35797902	ENSG00000239382	36009120	36014239	-	alkB homolog 6 [Source:HGNC Symbol;Acc:HGNC:28243]	ALKBH6
ARHGAP33-1	chr19	35791103	35797902	ENSG00000243968	35881890	35882153	+	RNA, 7SL, cytoplasmic 402, pseudogene [Source:HGNC Symbol;Acc:HGNC:46418]	RN7SL402P
ARHGAP33-1	chr19	35791103	35797902	ENSG00000248101	36008638	36014235	-	novel transcript	AC002116.1
ARHGAP33-1	chr19	35791103	35797902	ENSG00000249115	35612744	35625349	+
ARHGAP33-1	chr19	35791103	35797902	ENSG00000250799	35799988	35813299	-
ARHGAP33-1	chr19	35791103	35797902	ENSG00000267049	35769144	35771028	-	novel transcript	AC002398.1
ARHGAP33-1	chr19	35791103	35797902	ENSG00000267113	35957121	35957382	-	LYR motif containing 2 (LYRM2) pseudogene	AF038458.1
ARHGAP33-1	chr19	35791103	35797902	ENSG00000267120	35739252	35745432	-	novel transcript	AD000671.2
ARHGAP33-1	chr19	35791103	35797902	ENSG00000267190	35683778	35684201	-	thymidylate synthetase pseudogene 2 [Source:HGNC Symbol;Acc:HGNC:52352]	TYMSP2
ARHGAP33-1	chr19	35791103	35797902	ENSG00000267328	35754566	35755490	+	novel transcript	AC002398.2
ARHGAP33-1	chr19	35791103	35797902	ENSG00000267388	35960512	35964063	+	novel transcript	AF038458.2
ARHGAP33-1	chr19	35791103	35797902	ENSG00000267439	35747057	35753415	-	novel transcript	AD000671.3
ARHGAP33-1	chr19	35791103	35797902	ENSG00000267626	35608285	35612666	-	novel transcript	AC002115.1
ARHGAP33-1	chr19	35791103	35797902	ENSG00000267698	36014508	36045972	+	uncharacterized LOC101927572 [Source:NCBI gene (formerly Entrezgene);Acc:101927572]	AC002116.2
ARHGAP33-1	chr19	35791103	35797902	ENSG00000267786	35947115	35959192	+	novel transcript	AF038458.3
ARHGAP33-1	chr19	35791103	35797902	ENSG00000267796	35748361	35754519	+
ARHGAP33-1	chr19	35791103	35797902	ENSG00000272333	35718019	35738878	+
ARHGAP33-1	chr19	35791103	35797902	ENSG00000280023	36070239	36071070	+	TEC	AD000813.1
ARHGAP33-1	chr19	35791103	35797902	ENSG00000280194	35901561	35903855	-	novel transcript	AD000864.1
ARHGAP33-1	chr19	35791103	35797902	ENSG00000283758	35586260	35587296	+
ARHGAP33-1	chr19	35791103	35797902	ENSG00000283907	35557956	35581954	+	novel transcript, antisense to ATP4A	AD000090.1
ATIC-2	chr2	215319808	215551781	ENSG00000115414	215360440	215436172	-
ATIC-2	chr2	215319808	215551781	ENSG00000138363	215311817	215349773	+
ATIC-2	chr2	215319808	215551781	ENSG00000216721	215804731	215804981	-	NADH dehydrogenase (ubiquinone) 1 alpha subcomplex, 4, 9kDa (NDUFA4) pseudogene	AC093850.1
ATIC-2	chr2	215319808	215551781	ENSG00000225166	215453707	215463871	+
ATIC-2	chr2	215319808	215551781	ENSG00000227981	215579407	215582635	-	novel transcript	AC012668.1
ATIC-2	chr2	215319808	215551781	ENSG00000228618	215476667	215480248	+	novel transcript	AC012462.2
ATIC-2	chr2	215319808	215551781	ENSG00000230695	215436253	215436992	+	novel transcript	AC012462.3
ATIC-2	chr2	215319808	215551781	ENSG00000230838	215718043	215719424	+	long intergenic non-protein coding RNA 1614 [Source:HGNC Symbol;Acc:HGNC:51847]	LINC01614
ATIC-2	chr2	215319808	215551781	ENSG00000234938	215530447	215545526	-	novel transcript	AC012668.2
ATIC-2	chr2	215319808	215551781	ENSG00000235770	215611563	215843722	-
ATIC-2	chr2	215319808	215551781	ENSG00000237525	215533133	215713895	+
ATIC-2	chr2	215319808	215551781	ENSG00000237571	215274992	215277947	+	long intergenic non-protein coding RNA 2862 [Source:HGNC Symbol;Acc:HGNC:54419]	LINC02862
BASP1-2	chr5	17130028	17217047	ENSG00000176788	17065598	17276843	+
BASP1-2	chr5	17130028	17217047	ENSG00000185296	17306381	17306960	+	aurora kinase A interacting protein 1 (AURKAIP1) pseudogene	AC026785.1
BASP1-2	chr5	17130028	17217047	ENSG00000201436	16941843	16941951	-	RNA, U6 small nuclear 660, pseudogene [Source:HGNC Symbol;Acc:HGNC:47623]	RNU6-660P
BASP1-2	chr5	17130028	17217047	ENSG00000201715	17345616	17345955	+	RN7SK pseudogene 133 [Source:HGNC Symbol;Acc:HGNC:45857]	RN7SKP133
BASP1-2	chr5	17130028	17217047	ENSG00000206814	17117576	17117686	-	Y RNA [Source:RFAM;Acc:RF00019]	Y_RNA
BASP1-2	chr5	17130028	17217047	ENSG00000215196	17130028	17217047	-
BASP1-2	chr5	17130028	17217047	ENSG00000223361	17353695	17354624	-	ferritin heavy chain 1 pseudogene 10 [Source:HGNC Symbol;Acc:HGNC:3980]	FTH1P10
BASP1-2	chr5	17130028	17217047	ENSG00000243538	16902294	16902641	-	ribosomal protein S26 pseudogene 28 [Source:HGNC Symbol;Acc:HGNC:36149]	RPS26P28
BASP1-2	chr5	17130028	17217047	ENSG00000248205	17502043	17502363	-	H3 histone pseudogene 17 [Source:HGNC Symbol;Acc:HGNC:54451]	H3P17
BASP1-2	chr5	17130028	17217047	ENSG00000248223	17353910	17354899	+	novel transcript	AC026785.2
BASP1-2	chr5	17130028	17217047	ENSG00000248455	17404019	17441694	+
BASP1-2	chr5	17130028	17217047	ENSG00000249199	17369225	17375577	-
BASP1-2	chr5	17130028	17217047	ENSG00000249620	17511833	17512238	-	H3 histone pseudogene 18 [Source:HGNC Symbol;Acc:HGNC:54452]	H3P18
BASP1-2	chr5	17130028	17217047	ENSG00000249662	17444010	17483946	+
BASP1-2	chr5	17130028	17217047	ENSG00000250667	17495658	17495826	-	TAF11-like protein pseudogene	AC106774.1
BASP1-2	chr5	17130028	17217047	ENSG00000250816	17202274	17203145	+	DDB1 and CUL4 associated factor 13 pseudogene 2 [Source:HGNC Symbol;Acc:HGNC:43867]	DCAF13P2
BASP1-2	chr5	17130028	17217047	ENSG00000250822	17378906	17387310	-	long intergenic non-protein coding RNA 2111 [Source:HGNC Symbol;Acc:HGNC:52966]	LINC02111
BASP1-2	chr5	17130028	17217047	ENSG00000251990	17156971	17157071	-	RNA, 5S ribosomal pseudogene 180 [Source:HGNC Symbol;Acc:HGNC:43080]	RNA5SP180
BASP1-2	chr5	17130028	17217047	ENSG00000252908	17240611	17240715	+	RNA, U6 small nuclear 1003, pseudogene [Source:HGNC Symbol;Acc:HGNC:47966]	RNU6-1003P
BASP1-2	chr5	17130028	17217047	ENSG00000253093	16853994	16854114	+	RNA, 5S ribosomal pseudogene 179 [Source:HGNC Symbol;Acc:HGNC:43079]	RNA5SP179
BASP1-2	chr5	17130028	17217047	ENSG00000268799	17491361	17491769	-
BASP1-2	chr5	17130028	17217047	ENSG00000271892	17107360	17107789	-	novel transcript	AC026790.1
BASP1-2	chr5	17130028	17217047	ENSG00000284373	17498231	17498827	+	TATA-box binding protein associated factor 11 like 2 [Source:HGNC Symbol;Acc:HGNC:53845]	TAF11L2
BASP1-2	chr5	17130028	17217047	ENSG00000284552	17486231	17486829	+
BCLAF1-1	chr6	136289062	136292914	ENSG00000029363	136256627	136289851	-
BCLAF1-1	chr6	136289062	136292914	ENSG00000135525	136342281	136550819	-	microtubule associated protein 7 [Source:HGNC Symbol;Acc:HGNC:6869]	MAP7
BCLAF1-1	chr6	136289062	136292914	ENSG00000146410	136231024	136250335	-
BCLAF1-1	chr6	136289062	136292914	ENSG00000213111	136034553	136034886	-	cytochrome c oxidase subunit 5B pseudogene 2 [Source:HGNC Symbol;Acc:HGNC:2271]	COX5BP2
BCLAF1-1	chr6	136289062	136292914	ENSG00000216519	136317961	136318236	+	eukaryotic translation elongation factor 1 alpha 1 (EEF1A1) pseudogene	AL023284.1
BCLAF1-1	chr6	136289062	136292914	ENSG00000216613	136419847	136420425	-	phosphopantothenoylcysteine synthetase (PPCS) pseudogene	AL023284.2
BCLAF1-1	chr6	136289062	136292914	ENSG00000218424	136475862	136476150	-	NADH:ubiquinone oxidoreductase subunit S5 pseudogene 1 [Source:HGNC Symbol;Acc:HGNC:44039]	NDUFS5P1
BCLAF1-1	chr6	136289062	136292914	ENSG00000220660	136364129	136365079	+	ribosomal protein, large, P1 (RPLP1) pseudogene	AL023284.3
BCLAF1-1	chr6	136289062	136292914	ENSG00000237596	135991936	136225751	-
BCLAF1-1	chr6	136289062	136292914	ENSG00000260418	136335714	136336087	-	novel transcript	AL023284.4
BCLAF1-1	chr6	136289062	136292914	ENSG00000271765	136545192	136545492	+	RN7SK pseudogene 299 [Source:HGNC Symbol;Acc:HGNC:46023]	RN7SKP299
BCLAF1-1	chr6	136289062	136292914	ENSG00000272189	136550661	136552554	+	novel transcript, antisense to MAP7	AL024508.1
BCLAF1-1	chr6	136289062	136292914	ENSG00000277973	136206478	136206860	+	family with sequence similarity 98, member A (FAM98A) pseudogene	AL138828.2
BCLAF1-1	chr6	136290054	136293060	ENSG00000029363	136256627	136289851	-
BCLAF1-1	chr6	136290054	136293060	ENSG00000135525	136342281	136550819	-	microtubule associated protein 7 [Source:HGNC Symbol;Acc:HGNC:6869]	MAP7
BCLAF1-1	chr6	136290054	136293060	ENSG00000146410	136231024	136250335	-
BCLAF1-1	chr6	136290054	136293060	ENSG00000213111	136034553	136034886	-	cytochrome c oxidase subunit 5B pseudogene 2 [Source:HGNC Symbol;Acc:HGNC:2271]	COX5BP2
BCLAF1-1	chr6	136290054	136293060	ENSG00000216519	136317961	136318236	+	eukaryotic translation elongation factor 1 alpha 1 (EEF1A1) pseudogene	AL023284.1
BCLAF1-1	chr6	136290054	136293060	ENSG00000216613	136419847	136420425	-	phosphopantothenoylcysteine synthetase (PPCS) pseudogene	AL023284.2
BCLAF1-1	chr6	136290054	136293060	ENSG00000218424	136475862	136476150	-	NADH:ubiquinone oxidoreductase subunit S5 pseudogene 1 [Source:HGNC Symbol;Acc:HGNC:44039]	NDUFS5P1
BCLAF1-1	chr6	136290054	136293060	ENSG00000220660	136364129	136365079	+	ribosomal protein, large, P1 (RPLP1) pseudogene	AL023284.3
BCLAF1-1	chr6	136290054	136293060	ENSG00000237596	135991936	136225751	-
BCLAF1-1	chr6	136290054	136293060	ENSG00000260418	136335714	136336087	-	novel transcript	AL023284.4
BCLAF1-1	chr6	136290054	136293060	ENSG00000271765	136545192	136545492	+	RN7SK pseudogene 299 [Source:HGNC Symbol;Acc:HGNC:46023]	RN7SKP299
BCLAF1-1	chr6	136290054	136293060	ENSG00000272189	136550661	136552554	+	novel transcript, antisense to MAP7	AL024508.1
BCLAF1-1	chr6	136290054	136293060	ENSG00000277973	136206478	136206860	+	family with sequence similarity 98, member A (FAM98A) pseudogene	AL138828.2
BTG1-1	chr12	92145573	92167560	ENSG00000133639	92140278	92145897	-
BTG1-1	chr12	92145573	92167560	ENSG00000199895	92170353	92170453	-	Y RNA [Source:RFAM;Acc:RF00019]	Y_RNA
BTG1-1	chr12	92145573	92167560	ENSG00000205057	92420094	92428148	-
BTG1-1	chr12	92145573	92167560	ENSG00000239201	92168400	92168877	+	ribosomal protein L21 pseudogene 106 [Source:HGNC Symbol;Acc:HGNC:36188]	RPL21P106
BTG1-1	chr12	92145573	92167560	ENSG00000245904	92145573	92189660	+
BTG1-1	chr12	92145573	92167560	ENSG00000257127	92421531	92431002	+	chronic lymphocytic leukemia up-regulated 1 [Source:HGNC Symbol;Acc:HGNC:29841]	CLLU1
BTG1-1	chr12	92145573	92167560	ENSG00000257242	91984976	92142914	-
BTG1-1	chr12	92145573	92167560	ENSG00000257863	91901458	91906187	+	novel transcript	AC090049.1
BTG1-1	chr12	92145573	92167560	ENSG00000257893	91877391	91880655	+
BTG1-1	chr12	92145573	92167560	ENSG00000258224	91871122	91871230	-	alcohol dehydrogenase 5 (class III), chi polypeptide (ADH5 ) pseudogene	AC090049.2
BTG1-1	chr12	92145573	92167560	ENSG00000277851	92247756	92363832	-
BTG1-1	chr12	92145653	92147075	ENSG00000133639	92140278	92145897	-
BTG1-1	chr12	92145653	92147075	ENSG00000199895	92170353	92170453	-	Y RNA [Source:RFAM;Acc:RF00019]	Y_RNA
BTG1-1	chr12	92145653	92147075	ENSG00000205057	92420094	92428148	-
BTG1-1	chr12	92145653	92147075	ENSG00000239201	92168400	92168877	+	ribosomal protein L21 pseudogene 106 [Source:HGNC Symbol;Acc:HGNC:36188]	RPL21P106
BTG1-1	chr12	92145653	92147075	ENSG00000245904	92145573	92189660	+
BTG1-1	chr12	92145653	92147075	ENSG00000257127	92421531	92431002	+	chronic lymphocytic leukemia up-regulated 1 [Source:HGNC Symbol;Acc:HGNC:29841]	CLLU1
BTG1-1	chr12	92145653	92147075	ENSG00000257242	91984976	92142914	-
BTG1-1	chr12	92145653	92147075	ENSG00000257863	91901458	91906187	+	novel transcript	AC090049.1
BTG1-1	chr12	92145653	92147075	ENSG00000257893	91877391	91880655	+
BTG1-1	chr12	92145653	92147075	ENSG00000258224	91871122	91871230	-	alcohol dehydrogenase 5 (class III), chi polypeptide (ADH5 ) pseudogene	AC090049.2
BTG1-1	chr12	92145653	92147075	ENSG00000277851	92247756	92363832	-
BTG1-1	chr12	92146085	92167560	ENSG00000133639	92140278	92145897	-
BTG1-1	chr12	92146085	92167560	ENSG00000199895	92170353	92170453	-	Y RNA [Source:RFAM;Acc:RF00019]	Y_RNA
BTG1-1	chr12	92146085	92167560	ENSG00000205057	92420094	92428148	-
BTG1-1	chr12	92146085	92167560	ENSG00000239201	92168400	92168877	+	ribosomal protein L21 pseudogene 106 [Source:HGNC Symbol;Acc:HGNC:36188]	RPL21P106
BTG1-1	chr12	92146085	92167560	ENSG00000245904	92145573	92189660	+
BTG1-1	chr12	92146085	92167560	ENSG00000257127	92421531	92431002	+	chronic lymphocytic leukemia up-regulated 1 [Source:HGNC Symbol;Acc:HGNC:29841]	CLLU1
BTG1-1	chr12	92146085	92167560	ENSG00000257242	91984976	92142914	-
BTG1-1	chr12	92146085	92167560	ENSG00000257863	91901458	91906187	+	novel transcript	AC090049.1
BTG1-1	chr12	92146085	92167560	ENSG00000257893	91877391	91880655	+
BTG1-1	chr12	92146085	92167560	ENSG00000258224	91871122	91871230	-	alcohol dehydrogenase 5 (class III), chi polypeptide (ADH5 ) pseudogene	AC090049.2
BTG1-1	chr12	92146085	92167560	ENSG00000277851	92247756	92363832	-
BTG1-1	chr12	92146085	92189660	ENSG00000133639	92140278	92145897	-
BTG1-1	chr12	92146085	92189660	ENSG00000199895	92170353	92170453	-	Y RNA [Source:RFAM;Acc:RF00019]	Y_RNA
BTG1-1	chr12	92146085	92189660	ENSG00000205057	92420094	92428148	-
BTG1-1	chr12	92146085	92189660	ENSG00000239201	92168400	92168877	+	ribosomal protein L21 pseudogene 106 [Source:HGNC Symbol;Acc:HGNC:36188]	RPL21P106
BTG1-1	chr12	92146085	92189660	ENSG00000245904	92145573	92189660	+
BTG1-1	chr12	92146085	92189660	ENSG00000257127	92421531	92431002	+	chronic lymphocytic leukemia up-regulated 1 [Source:HGNC Symbol;Acc:HGNC:29841]	CLLU1
BTG1-1	chr12	92146085	92189660	ENSG00000257242	91984976	92142914	-
BTG1-1	chr12	92146085	92189660	ENSG00000257863	91901458	91906187	+	novel transcript	AC090049.1
BTG1-1	chr12	92146085	92189660	ENSG00000257893	91877391	91880655	+
BTG1-1	chr12	92146085	92189660	ENSG00000258224	91871122	91871230	-	alcohol dehydrogenase 5 (class III), chi polypeptide (ADH5 ) pseudogene	AC090049.2
BTG1-1	chr12	92146085	92189660	ENSG00000266923	92421531	92483680	+	novel transcript, antisense to CLLU1OS	AC063949.2
BTG1-1	chr12	92146085	92189660	ENSG00000277851	92247756	92363832	-
BTG1-1	chr12	92146202	92184204	ENSG00000133639	92140278	92145897	-
BTG1-1	chr12	92146202	92184204	ENSG00000199895	92170353	92170453	-	Y RNA [Source:RFAM;Acc:RF00019]	Y_RNA
BTG1-1	chr12	92146202	92184204	ENSG00000205057	92420094	92428148	-
BTG1-1	chr12	92146202	92184204	ENSG00000239201	92168400	92168877	+	ribosomal protein L21 pseudogene 106 [Source:HGNC Symbol;Acc:HGNC:36188]	RPL21P106
BTG1-1	chr12	92146202	92184204	ENSG00000245904	92145573	92189660	+
BTG1-1	chr12	92146202	92184204	ENSG00000257127	92421531	92431002	+	chronic lymphocytic leukemia up-regulated 1 [Source:HGNC Symbol;Acc:HGNC:29841]	CLLU1
BTG1-1	chr12	92146202	92184204	ENSG00000257242	91984976	92142914	-
BTG1-1	chr12	92146202	92184204	ENSG00000257863	91901458	91906187	+	novel transcript	AC090049.1
BTG1-1	chr12	92146202	92184204	ENSG00000257893	91877391	91880655	+
BTG1-1	chr12	92146202	92184204	ENSG00000258224	91871122	91871230	-	alcohol dehydrogenase 5 (class III), chi polypeptide (ADH5 ) pseudogene	AC090049.2
BTG1-1	chr12	92146202	92184204	ENSG00000266923	92421531	92483680	+	novel transcript, antisense to CLLU1OS	AC063949.2
BTG1-1	chr12	92146202	92184204	ENSG00000277851	92247756	92363832	-
BTG1-1	chr12	92146202	92184207	ENSG00000133639	92140278	92145897	-
BTG1-1	chr12	92146202	92184207	ENSG00000199895	92170353	92170453	-	Y RNA [Source:RFAM;Acc:RF00019]	Y_RNA
BTG1-1	chr12	92146202	92184207	ENSG00000205057	92420094	92428148	-
BTG1-1	chr12	92146202	92184207	ENSG00000239201	92168400	92168877	+	ribosomal protein L21 pseudogene 106 [Source:HGNC Symbol;Acc:HGNC:36188]	RPL21P106
BTG1-1	chr12	92146202	92184207	ENSG00000245904	92145573	92189660	+
BTG1-1	chr12	92146202	92184207	ENSG00000257127	92421531	92431002	+	chronic lymphocytic leukemia up-regulated 1 [Source:HGNC Symbol;Acc:HGNC:29841]	CLLU1
BTG1-1	chr12	92146202	92184207	ENSG00000257242	91984976	92142914	-
BTG1-1	chr12	92146202	92184207	ENSG00000257863	91901458	91906187	+	novel transcript	AC090049.1
BTG1-1	chr12	92146202	92184207	ENSG00000257893	91877391	91880655	+
BTG1-1	chr12	92146202	92184207	ENSG00000258224	91871122	91871230	-	alcohol dehydrogenase 5 (class III), chi polypeptide (ADH5 ) pseudogene	AC090049.2
BTG1-1	chr12	92146202	92184207	ENSG00000266923	92421531	92483680	+	novel transcript, antisense to CLLU1OS	AC063949.2
BTG1-1	chr12	92146202	92184207	ENSG00000277851	92247756	92363832	-
BTG1-1	chr12	92146202	92186394	ENSG00000133639	92140278	92145897	-
BTG1-1	chr12	92146202	92186394	ENSG00000199895	92170353	92170453	-	Y RNA [Source:RFAM;Acc:RF00019]	Y_RNA
BTG1-1	chr12	92146202	92186394	ENSG00000205057	92420094	92428148	-
BTG1-1	chr12	92146202	92186394	ENSG00000239201	92168400	92168877	+	ribosomal protein L21 pseudogene 106 [Source:HGNC Symbol;Acc:HGNC:36188]	RPL21P106
BTG1-1	chr12	92146202	92186394	ENSG00000245904	92145573	92189660	+
BTG1-1	chr12	92146202	92186394	ENSG00000257127	92421531	92431002	+	chronic lymphocytic leukemia up-regulated 1 [Source:HGNC Symbol;Acc:HGNC:29841]	CLLU1
BTG1-1	chr12	92146202	92186394	ENSG00000257242	91984976	92142914	-
BTG1-1	chr12	92146202	92186394	ENSG00000257863	91901458	91906187	+	novel transcript	AC090049.1
BTG1-1	chr12	92146202	92186394	ENSG00000257893	91877391	91880655	+
BTG1-1	chr12	92146202	92186394	ENSG00000258224	91871122	91871230	-	alcohol dehydrogenase 5 (class III), chi polypeptide (ADH5 ) pseudogene	AC090049.2
BTG1-1	chr12	92146202	92186394	ENSG00000266923	92421531	92483680	+	novel transcript, antisense to CLLU1OS	AC063949.2
BTG1-1	chr12	92146202	92186394	ENSG00000277851	92247756	92363832	-
C8orf37-1	chr8	95204456	95810136	ENSG00000156172	95244919	95269201	-
C8orf37-1	chr8	95204456	95810136	ENSG00000164938	94925972	94949411	-
C8orf37-1	chr8	95204456	95810136	ENSG00000175895	95133804	95156684	+
C8orf37-1	chr8	95204456	95810136	ENSG00000183663	96068729	96069681	-	glyceraldehyde-3-phosphate dehydrogenase (GAPDH) pseudogene	AC007992.1
C8orf37-1	chr8	95204456	95810136	ENSG00000200525	95055214	95055320	+	RNA, U6 small nuclear 1209, pseudogene [Source:HGNC Symbol;Acc:HGNC:48172]	RNU6-1209P
C8orf37-1	chr8	95204456	95810136	ENSG00000202112	95599114	95599219	+	RNA, U6 small nuclear 690, pseudogene [Source:HGNC Symbol;Acc:HGNC:47653]	RNU6-690P
C8orf37-1	chr8	95204456	95810136	ENSG00000245080	95066808	95073182	-	MIR3150B host gene [Source:HGNC Symbol;Acc:HGNC:52000]	MIR3150BHG
C8orf37-1	chr8	95204456	95810136	ENSG00000248762	95986108	95993103	-	novel transcript	AC012339.1
C8orf37-1	chr8	95204456	95810136	ENSG00000253351	95207007	95216374	-
C8orf37-1	chr8	95204456	95810136	ENSG00000253528	94974573	94974853	-	ORM1-like 2 (S. cerevisiae) (ORMDL2) pseudogene	AC087752.2
C8orf37-1	chr8	95204456	95810136	ENSG00000253773	95204456	95810136	+
C8orf37-1	chr8	95204456	95810136	ENSG00000253872	95505406	95527524	+	novel transcript	AC083836.1
C8orf37-1	chr8	95204456	95810136	ENSG00000253878	94950037	94951396	+	novel transcript	AC087752.3
C8orf37-1	chr8	95204456	95810136	ENSG00000253945	95403802	95403894	+	ribosomal protein L36a-like (RPL36AL) pseudogene	AC024995.1
C8orf37-1	chr8	95204456	95810136	ENSG00000254079	95947781	95948233	-	SRSF3 pseudogene 2 [Source:HGNC Symbol;Acc:HGNC:54692]	SRSF3P2
C8orf37-1	chr8	95204456	95810136	ENSG00000254248	95071732	95087924	-	novel transcript, antisense to NDUFAF6	AC068189.1
C8orf37-1	chr8	95204456	95810136	ENSG00000283522	95072914	95072993	+	microRNA 3150a [Source:HGNC Symbol;Acc:HGNC:38362]	MIR3150A
C8orf37-1	chr8	95204456	95810136	ENSG00000284147	95072911	95072996	-	microRNA 3150b [Source:HGNC Symbol;Acc:HGNC:38938]	MIR3150B
C8orf37-1	chr8	95268835	95653710	ENSG00000156172	95244919	95269201	-
C8orf37-1	chr8	95268835	95653710	ENSG00000175895	95133804	95156684	+
C8orf37-1	chr8	95268835	95653710	ENSG00000200525	95055214	95055320	+	RNA, U6 small nuclear 1209, pseudogene [Source:HGNC Symbol;Acc:HGNC:48172]	RNU6-1209P
C8orf37-1	chr8	95268835	95653710	ENSG00000202112	95599114	95599219	+	RNA, U6 small nuclear 690, pseudogene [Source:HGNC Symbol;Acc:HGNC:47653]	RNU6-690P
C8orf37-1	chr8	95268835	95653710	ENSG00000245080	95066808	95073182	-	MIR3150B host gene [Source:HGNC Symbol;Acc:HGNC:52000]	MIR3150BHG
C8orf37-1	chr8	95268835	95653710	ENSG00000253351	95207007	95216374	-
C8orf37-1	chr8	95268835	95653710	ENSG00000253528	94974573	94974853	-	ORM1-like 2 (S. cerevisiae) (ORMDL2) pseudogene	AC087752.2
C8orf37-1	chr8	95268835	95653710	ENSG00000253773	95204456	95810136	+
C8orf37-1	chr8	95268835	95653710	ENSG00000253872	95505406	95527524	+	novel transcript	AC083836.1
C8orf37-1	chr8	95268835	95653710	ENSG00000253945	95403802	95403894	+	ribosomal protein L36a-like (RPL36AL) pseudogene	AC024995.1
C8orf37-1	chr8	95268835	95653710	ENSG00000254079	95947781	95948233	-	SRSF3 pseudogene 2 [Source:HGNC Symbol;Acc:HGNC:54692]	SRSF3P2
C8orf37-1	chr8	95268835	95653710	ENSG00000254248	95071732	95087924	-	novel transcript, antisense to NDUFAF6	AC068189.1
C8orf37-1	chr8	95268835	95653710	ENSG00000283522	95072914	95072993	+	microRNA 3150a [Source:HGNC Symbol;Acc:HGNC:38362]	MIR3150A
C8orf37-1	chr8	95268835	95653710	ENSG00000284147	95072911	95072996	-	microRNA 3150b [Source:HGNC Symbol;Acc:HGNC:38938]	MIR3150B
C8orf37-1	chr8	95268835	95809736	ENSG00000156172	95244919	95269201	-
C8orf37-1	chr8	95268835	95809736	ENSG00000175895	95133804	95156684	+
C8orf37-1	chr8	95268835	95809736	ENSG00000183663	96068729	96069681	-	glyceraldehyde-3-phosphate dehydrogenase (GAPDH) pseudogene	AC007992.1
C8orf37-1	chr8	95268835	95809736	ENSG00000200525	95055214	95055320	+	RNA, U6 small nuclear 1209, pseudogene [Source:HGNC Symbol;Acc:HGNC:48172]	RNU6-1209P
C8orf37-1	chr8	95268835	95809736	ENSG00000202112	95599114	95599219	+	RNA, U6 small nuclear 690, pseudogene [Source:HGNC Symbol;Acc:HGNC:47653]	RNU6-690P
C8orf37-1	chr8	95268835	95809736	ENSG00000245080	95066808	95073182	-	MIR3150B host gene [Source:HGNC Symbol;Acc:HGNC:52000]	MIR3150BHG
C8orf37-1	chr8	95268835	95809736	ENSG00000248762	95986108	95993103	-	novel transcript	AC012339.1
C8orf37-1	chr8	95268835	95809736	ENSG00000253351	95207007	95216374	-
C8orf37-1	chr8	95268835	95809736	ENSG00000253528	94974573	94974853	-	ORM1-like 2 (S. cerevisiae) (ORMDL2) pseudogene	AC087752.2
C8orf37-1	chr8	95268835	95809736	ENSG00000253773	95204456	95810136	+
C8orf37-1	chr8	95268835	95809736	ENSG00000253872	95505406	95527524	+	novel transcript	AC083836.1
C8orf37-1	chr8	95268835	95809736	ENSG00000253945	95403802	95403894	+	ribosomal protein L36a-like (RPL36AL) pseudogene	AC024995.1
C8orf37-1	chr8	95268835	95809736	ENSG00000254079	95947781	95948233	-	SRSF3 pseudogene 2 [Source:HGNC Symbol;Acc:HGNC:54692]	SRSF3P2
C8orf37-1	chr8	95268835	95809736	ENSG00000254248	95071732	95087924	-	novel transcript, antisense to NDUFAF6	AC068189.1
C8orf37-1	chr8	95268835	95809736	ENSG00000283522	95072914	95072993	+	microRNA 3150a [Source:HGNC Symbol;Acc:HGNC:38362]	MIR3150A
C8orf37-1	chr8	95268835	95809736	ENSG00000284147	95072911	95072996	-	microRNA 3150b [Source:HGNC Symbol;Acc:HGNC:38938]	MIR3150B
C8orf37-1	chr8	95268835	95812483	ENSG00000156172	95244919	95269201	-
C8orf37-1	chr8	95268835	95812483	ENSG00000175895	95133804	95156684	+
C8orf37-1	chr8	95268835	95812483	ENSG00000183663	96068729	96069681	-	glyceraldehyde-3-phosphate dehydrogenase (GAPDH) pseudogene	AC007992.1
C8orf37-1	chr8	95268835	95812483	ENSG00000200525	95055214	95055320	+	RNA, U6 small nuclear 1209, pseudogene [Source:HGNC Symbol;Acc:HGNC:48172]	RNU6-1209P
C8orf37-1	chr8	95268835	95812483	ENSG00000202112	95599114	95599219	+	RNA, U6 small nuclear 690, pseudogene [Source:HGNC Symbol;Acc:HGNC:47653]	RNU6-690P
C8orf37-1	chr8	95268835	95812483	ENSG00000245080	95066808	95073182	-	MIR3150B host gene [Source:HGNC Symbol;Acc:HGNC:52000]	MIR3150BHG
C8orf37-1	chr8	95268835	95812483	ENSG00000248762	95986108	95993103	-	novel transcript	AC012339.1
C8orf37-1	chr8	95268835	95812483	ENSG00000253351	95207007	95216374	-
C8orf37-1	chr8	95268835	95812483	ENSG00000253528	94974573	94974853	-	ORM1-like 2 (S. cerevisiae) (ORMDL2) pseudogene	AC087752.2
C8orf37-1	chr8	95268835	95812483	ENSG00000253773	95204456	95810136	+
C8orf37-1	chr8	95268835	95812483	ENSG00000253872	95505406	95527524	+	novel transcript	AC083836.1
C8orf37-1	chr8	95268835	95812483	ENSG00000253945	95403802	95403894	+	ribosomal protein L36a-like (RPL36AL) pseudogene	AC024995.1
C8orf37-1	chr8	95268835	95812483	ENSG00000254079	95947781	95948233	-	SRSF3 pseudogene 2 [Source:HGNC Symbol;Acc:HGNC:54692]	SRSF3P2
C8orf37-1	chr8	95268835	95812483	ENSG00000254248	95071732	95087924	-	novel transcript, antisense to NDUFAF6	AC068189.1
C8orf37-1	chr8	95268835	95812483	ENSG00000283522	95072914	95072993	+	microRNA 3150a [Source:HGNC Symbol;Acc:HGNC:38362]	MIR3150A
C8orf37-1	chr8	95268835	95812483	ENSG00000284147	95072911	95072996	-	microRNA 3150b [Source:HGNC Symbol;Acc:HGNC:38938]	MIR3150B
C8orf37-1	chr8	95268836	95810143	ENSG00000156172	95244919	95269201	-
C8orf37-1	chr8	95268836	95810143	ENSG00000156172	95244919	95269201	-
C8orf37-1	chr8	95268836	95810143	ENSG00000156172	95244919	95269201	-
C8orf37-1	chr8	95268836	95810143	ENSG00000156172	95244919	95269201	-
C8orf37-1	chr8	95268836	95810143	ENSG00000156172	95244919	95269201	-
C8orf37-1	chr8	95268836	95810143	ENSG00000156172	95244919	95269201	-
C8orf37-1	chr8	95268836	95810143	ENSG00000156172	95244919	95269201	-
C8orf37-1	chr8	95268836	95810143	ENSG00000156172	95244919	95269201	-
C8orf37-1	chr8	95268836	95810143	ENSG00000156172	95244919	95269201	-
C8orf37-1	chr8	95268836	95810143	ENSG00000175895	95133804	95156684	+
C8orf37-1	chr8	95268836	95810143	ENSG00000175895	95133804	95156684	+
C8orf37-1	chr8	95268836	95810143	ENSG00000175895	95133804	95156684	+
C8orf37-1	chr8	95268836	95810143	ENSG00000175895	95133804	95156684	+
C8orf37-1	chr8	95268836	95810143	ENSG00000175895	95133804	95156684	+
C8orf37-1	chr8	95268836	95810143	ENSG00000175895	95133804	95156684	+
C8orf37-1	chr8	95268836	95810143	ENSG00000175895	95133804	95156684	+
C8orf37-1	chr8	95268836	95810143	ENSG00000175895	95133804	95156684	+
C8orf37-1	chr8	95268836	95810143	ENSG00000175895	95133804	95156684	+
C8orf37-1	chr8	95268836	95810143	ENSG00000183663	96068729	96069681	-	glyceraldehyde-3-phosphate dehydrogenase (GAPDH) pseudogene	AC007992.1
C8orf37-1	chr8	95268836	95810143	ENSG00000200525	95055214	95055320	+	RNA, U6 small nuclear 1209, pseudogene [Source:HGNC Symbol;Acc:HGNC:48172]	RNU6-1209P
C8orf37-1	chr8	95268836	95810143	ENSG00000202112	95599114	95599219	+	RNA, U6 small nuclear 690, pseudogene [Source:HGNC Symbol;Acc:HGNC:47653]	RNU6-690P
C8orf37-1	chr8	95268836	95810143	ENSG00000245080	95066808	95073182	-	MIR3150B host gene [Source:HGNC Symbol;Acc:HGNC:52000]	MIR3150BHG
C8orf37-1	chr8	95268836	95810143	ENSG00000248762	95986108	95993103	-	novel transcript	AC012339.1
C8orf37-1	chr8	95268836	95810143	ENSG00000253351	95207007	95216374	-
C8orf37-1	chr8	95268836	95810143	ENSG00000253351	95207007	95216374	-
C8orf37-1	chr8	95268836	95810143	ENSG00000253351	95207007	95216374	-
C8orf37-1	chr8	95268836	95810143	ENSG00000253351	95207007	95216374	-
C8orf37-1	chr8	95268836	95810143	ENSG00000253351	95207007	95216374	-
C8orf37-1	chr8	95268836	95810143	ENSG00000253351	95207007	95216374	-
C8orf37-1	chr8	95268836	95810143	ENSG00000253351	95207007	95216374	-
C8orf37-1	chr8	95268836	95810143	ENSG00000253351	95207007	95216374	-
C8orf37-1	chr8	95268836	95810143	ENSG00000253351	95207007	95216374	-
C8orf37-1	chr8	95268836	95810143	ENSG00000253528	94974573	94974853	-	ORM1-like 2 (S. cerevisiae) (ORMDL2) pseudogene	AC087752.2
C8orf37-1	chr8	95268836	95810143	ENSG00000253773	95204456	95810136	+
C8orf37-1	chr8	95268836	95810143	ENSG00000253773	95204456	95810136	+
C8orf37-1	chr8	95268836	95810143	ENSG00000253773	95204456	95810136	+
C8orf37-1	chr8	95268836	95810143	ENSG00000253773	95204456	95810136	+
C8orf37-1	chr8	95268836	95810143	ENSG00000253773	95204456	95810136	+
C8orf37-1	chr8	95268836	95810143	ENSG00000253773	95204456	95810136	+
C8orf37-1	chr8	95268836	95810143	ENSG00000253773	95204456	95810136	+
C8orf37-1	chr8	95268836	95810143	ENSG00000253773	95204456	95810136	+
C8orf37-1	chr8	95268836	95810143	ENSG00000253773	95204456	95810136	+
C8orf37-1	chr8	95268836	95810143	ENSG00000253872	95505406	95527524	+	novel transcript	AC083836.1
C8orf37-1	chr8	95268836	95810143	ENSG00000253945	95403802	95403894	+	ribosomal protein L36a-like (RPL36AL) pseudogene	AC024995.1
C8orf37-1	chr8	95268836	95810143	ENSG00000254079	95947781	95948233	-	SRSF3 pseudogene 2 [Source:HGNC Symbol;Acc:HGNC:54692]	SRSF3P2
C8orf37-1	chr8	95268836	95810143	ENSG00000254248	95071732	95087924	-	novel transcript, antisense to NDUFAF6	AC068189.1
C8orf37-1	chr8	95268836	95810143	ENSG00000283522	95072914	95072993	+	microRNA 3150a [Source:HGNC Symbol;Acc:HGNC:38362]	MIR3150A
C8orf37-1	chr8	95268836	95810143	ENSG00000284147	95072911	95072996	-	microRNA 3150b [Source:HGNC Symbol;Acc:HGNC:38938]	MIR3150B
C8orf37-1	chr8	95798395	95800649	ENSG00000183663	96068729	96069681	-	glyceraldehyde-3-phosphate dehydrogenase (GAPDH) pseudogene	AC007992.1
C8orf37-1	chr8	95798395	95800649	ENSG00000202112	95599114	95599219	+	RNA, U6 small nuclear 690, pseudogene [Source:HGNC Symbol;Acc:HGNC:47653]	RNU6-690P
C8orf37-1	chr8	95798395	95800649	ENSG00000248762	95986108	95993103	-	novel transcript	AC012339.1
C8orf37-1	chr8	95798395	95800649	ENSG00000253872	95505406	95527524	+	novel transcript	AC083836.1
C8orf37-1	chr8	95798395	95800649	ENSG00000254079	95947781	95948233	-	SRSF3 pseudogene 2 [Source:HGNC Symbol;Acc:HGNC:54692]	SRSF3P2
CEP131-1	chr17	81197393	81200288	ENSG00000141577	81189593	81222999	-
CEP131-1	chr17	81197393	81200288	ENSG00000157637	81245000	81295547	-
CEP131-1	chr17	81197393	81200288	ENSG00000167302	81228277	81239091	-
CEP131-1	chr17	81197393	81200288	ENSG00000175866	81035122	81117432	+	BAR/IMD domain containing adaptor protein 2 [Source:HGNC Symbol;Acc:HGNC:947]	BAIAP2
CEP131-1	chr17	81197393	81200288	ENSG00000176108	80991598	81009517	+	charged multivesicular body protein 6 [Source:HGNC Symbol;Acc:HGNC:25675]	CHMP6
CEP131-1	chr17	81197393	81200288	ENSG00000181409	81117295	81166077	-
CEP131-1	chr17	81197393	81200288	ENSG00000185168	81303771	81309248	-	long intergenic non-protein coding RNA 482 [Source:HGNC Symbol;Acc:HGNC:26816]	LINC00482
CEP131-1	chr17	81197393	81200288	ENSG00000185332	81311270	81330674	-
CEP131-1	chr17	81197393	81200288	ENSG00000207736	81125276	81125373	-	microRNA 657 [Source:HGNC Symbol;Acc:HGNC:32913]	MIR657
CEP131-1	chr17	81197393	81200288	ENSG00000211563	81125877	81125955	+	microRNA 3065 [Source:HGNC Symbol;Acc:HGNC:38234]	MIR3065
CEP131-1	chr17	81197393	81200288	ENSG00000221025	81133196	81133308	-	microRNA 1250 [Source:HGNC Symbol;Acc:HGNC:35316]	MIR1250
CEP131-1	chr17	81197393	81200288	ENSG00000224877	81239239	81241281	+
CEP131-1	chr17	81197393	81200288	ENSG00000225180	81165507	81183164	+
CEP131-1	chr17	81197393	81200288	ENSG00000226137	81029130	81034881	-	BAIAP2 divergent transcript [Source:HGNC Symbol;Acc:HGNC:44342]	BAIAP2-DT
CEP131-1	chr17	81197393	81200288	ENSG00000240270	80976454	80976948	+	ribosomal protein L12 pseudogene 37 [Source:HGNC Symbol;Acc:HGNC:35565]	RPL12P37
CEP131-1	chr17	81197393	81200288	ENSG00000260005	81228707	81233983	+	novel transcript, antisense to C17orf56	AC027601.1
CEP131-1	chr17	81197393	81200288	ENSG00000261924	80966239	80971213	-	novel transcript, antisense to RPTOR	AC127496.1
CEP131-1	chr17	81197393	81200288	ENSG00000262098	81023545	81025503	-	novel transcript	AC127496.2
CEP131-1	chr17	81197393	81200288	ENSG00000262115	81197393	81200288	+	novel transcript, antisense to AZI1	AC027601.2
CEP131-1	chr17	81197393	81200288	ENSG00000262223	81376001	81385360	-
CEP131-1	chr17	81197393	81200288	ENSG00000262313	80940418	80942033	-	novel transcript, antisense to RPTOR	AC127496.3
CEP131-1	chr17	81197393	81200288	ENSG00000262662	80960766	80961713	-	novel transcript, antisense to RPTOR	AC127496.4
CEP131-1	chr17	81197393	81200288	ENSG00000262873	81017969	81020011	-
CEP131-1	chr17	81197393	81200288	ENSG00000262877	81388126	81390256	-
CEP131-1	chr17	81197393	81200288	ENSG00000263154	81362272	81374214	+	novel transcript	AC110285.3
CEP131-1	chr17	81197393	81200288	ENSG00000263167	81135771	81136256	+	novel transcript, antisense to AATK	AC115099.1
CEP131-1	chr17	81197393	81200288	ENSG00000263218	80999509	81000130	-	novel transcript, antisense to CHMP6	AC127496.6
CEP131-1	chr17	81197393	81200288	ENSG00000263271	81461013	81461937	-	novel transcript, antisense to BAHCC1	AC110285.4
CEP131-1	chr17	81197393	81200288	ENSG00000266074	81395475	81466332	+
CEP131-1	chr17	81197393	81200288	ENSG00000266189	81451104	81451188	-	microRNA 3186 [Source:HGNC Symbol;Acc:HGNC:38311]	MIR3186
CEP131-1	chr17	81197393	81200288	ENSG00000266392	81400716	81400778	-	microRNA 4740 [Source:HGNC Symbol;Acc:HGNC:41711]	MIR4740
CEP131-1	chr17	81197393	81200288	ENSG00000274833	81387415	81387766	+	novel transcript	AC110285.5
CEP131-1	chr17	81197393	81200288	ENSG00000275542	81339183	81339691	-
CEP131-1	chr17	81197393	81200288	ENSG00000275966	81345476	81345966	-
CEP131-1	chr17	81197393	81200288	ENSG00000276101	81251194	81251803	+	novel transcript, antisense to SLC38A10	AC027601.3
CEP131-1	chr17	81197393	81200288	ENSG00000278200	81480523	81481570	-	long intergenic non-protein coding RNA 1971 [Source:HGNC Symbol;Acc:HGNC:52797]	LINC01971
CEP131-1	chr17	81197393	81200288	ENSG00000279187	81262920	81265401	+	TEC	AC027601.4
CEP131-1	chr17	81197393	81200288	ENSG00000279692	81395609	81397144	-	TEC	AC110285.6
CEP131-1	chr17	81197393	81200288	ENSG00000280351	81003335	81005132	+	TEC	AC127496.7
CEP131-1	chr17	81197393	81200288	ENSG00000283604	81125883	81125949	-	microRNA 338 [Source:HGNC Symbol;Acc:HGNC:31775]	MIR338
CEP41-1	chr7	130394096	130395605	ENSG00000091704	130380339	130388114	+
CEP41-1	chr7	130394096	130395605	ENSG00000106477	130393771	130442433	-
CEP41-1	chr7	130394096	130395605	ENSG00000106484	130486171	130506296	+
CEP41-1	chr7	130394096	130395605	ENSG00000128510	130293134	130324180	+
CEP41-1	chr7	130394096	130395605	ENSG00000146842	130164715	130207770	-
CEP41-1	chr7	130394096	130395605	ENSG00000158516	130266827	130289798	+
CEP41-1	chr7	130394096	130395605	ENSG00000158525	130344816	130368730	+	carboxypeptidase A5 [Source:HGNC Symbol;Acc:HGNC:15722]	CPA5
CEP41-1	chr7	130394096	130395605	ENSG00000158623	130506238	130668748	-	COPI coat complex subunit gamma 2 [Source:HGNC Symbol;Acc:HGNC:2237]	COPG2
CEP41-1	chr7	130394096	130395605	ENSG00000165120	130207860	130216843	+
CEP41-1	chr7	130394096	130395605	ENSG00000199043	130496111	130496204	+	microRNA 335 [Source:HGNC Symbol;Acc:HGNC:31773]	MIR335
CEP41-1	chr7	130394096	130395605	ENSG00000213265	130668648	130687432	-
CEP41-1	chr7	130394096	130395605	ENSG00000226045	130645225	130645594	-	glutamyl-tRNA(Gln) amidotransferase, subunit C homolog (bacterial)(GATC) pseudogene	AC234644.1
CEP41-1	chr7	130394096	130395605	ENSG00000229196	130141731	130142615	+
CEP41-1	chr7	130394096	130395605	ENSG00000239021	130602795	130602913	-	RNA, 5S ribosomal pseudogene 246 [Source:HGNC Symbol;Acc:HGNC:43146]	RNA5SP246
CEP41-1	chr7	130394096	130395605	ENSG00000240571	130173718	130205361	+	novel transcript	AC087071.2
CEP41-1	chr7	130394096	130395605	ENSG00000259920	130481491	130484392	-	novel transcript	AC007938.1
CEP41-1	chr7	130394096	130395605	ENSG00000270823	130495794	130498427	-	novel transcript, antisense to MEST	AC007938.2
CEP41-1	chr7	130394096	130395605	ENSG00000270953	130507660	130508282	+	novel transcript, antisense to COPG2	AC007938.3
CEP41-1	chr7	130394096	130395605	ENSG00000270992	130255902	130262770	+	ribosomal protein L29, pseudogene	AC024085.1
CEP41-1	chr7	130394096	130395605	ENSG00000272701	130486042	130491033	-
CEP41-1	chr7	130394096	130395605	ENSG00000274500	130489868	130489966	+		AC007938.4
CEP41-1	chr7	130394096	130395605	ENSG00000277269	130487483	130487622	+		AC007938.5
CEP41-1	chr7	130394096	130395605	ENSG00000278055	130488304	130488538	+		AC007938.6
DIRC3-1	chr2	217223633	217309405	ENSG00000233143	217282739	217336120	+
DIRC3-1	chr2	217223633	217309405	ENSG00000251982	217251556	217251875	+	RN7SK pseudogene 43 [Source:HGNC Symbol;Acc:HGNC:45767]	RN7SKP43
DIRC3-1	chr2	217223633	217309405	ENSG00000259855	216995906	216996490	+	novel transcript	AC007749.1
DIRC3-1	chr2	217223633	217309405	ENSG00000278004	217283370	217283523	+		AC009492.1
DIRC3-1	chr2	217223633	217311312	ENSG00000233143	217282739	217336120	+
DIRC3-1	chr2	217223633	217311312	ENSG00000251982	217251556	217251875	+	RN7SK pseudogene 43 [Source:HGNC Symbol;Acc:HGNC:45767]	RN7SKP43
DIRC3-1	chr2	217223633	217311312	ENSG00000259855	216995906	216996490	+	novel transcript	AC007749.1
DIRC3-1	chr2	217223633	217311312	ENSG00000278004	217283370	217283523	+		AC009492.1
DIRC3-1	chr2	217223638	217227990	ENSG00000233143	217282739	217336120	+
DIRC3-1	chr2	217223638	217227990	ENSG00000251982	217251556	217251875	+	RN7SK pseudogene 43 [Source:HGNC Symbol;Acc:HGNC:45767]	RN7SKP43
DIRC3-1	chr2	217223638	217227990	ENSG00000259855	216995906	216996490	+	novel transcript	AC007749.1
DIRC3-1	chr2	217223638	217227990	ENSG00000278004	217283370	217283523	+		AC009492.1
DIRC3-1	chr2	217223713	217311312	ENSG00000233143	217282739	217336120	+
DIRC3-1	chr2	217223713	217311312	ENSG00000233143	217282739	217336120	+
DIRC3-1	chr2	217223713	217311312	ENSG00000251982	217251556	217251875	+	RN7SK pseudogene 43 [Source:HGNC Symbol;Acc:HGNC:45767]	RN7SKP43
DIRC3-1	chr2	217223713	217311312	ENSG00000259855	216995906	216996490	+	novel transcript	AC007749.1
DIRC3-1	chr2	217223713	217311312	ENSG00000278004	217283370	217283523	+		AC009492.1
DIRC3-1	chr2	217223713	217311312	ENSG00000278004	217283370	217283523	+		AC009492.1
DIRC3-1	chr2	217261384	217268475	ENSG00000233143	217282739	217336120	+
DIRC3-1	chr2	217261384	217268475	ENSG00000251982	217251556	217251875	+	RN7SK pseudogene 43 [Source:HGNC Symbol;Acc:HGNC:45767]	RN7SKP43
DIRC3-1	chr2	217261384	217268475	ENSG00000259855	216995906	216996490	+	novel transcript	AC007749.1
DIRC3-1	chr2	217261384	217268475	ENSG00000278004	217283370	217283523	+		AC009492.1
DIRC3-1	chr2	217277308	217344204	ENSG00000233143	217282739	217336120	+
DIRC3-1	chr2	217277308	217344204	ENSG00000251982	217251556	217251875	+	RN7SK pseudogene 43 [Source:HGNC Symbol;Acc:HGNC:45767]	RN7SKP43
DIRC3-1	chr2	217277308	217344204	ENSG00000259855	216995906	216996490	+	novel transcript	AC007749.1
DIRC3-1	chr2	217277308	217344204	ENSG00000278004	217283370	217283523	+		AC009492.1
DIRC3-1	chr2	217277980	217304026	ENSG00000233143	217282739	217336120	+
DIRC3-1	chr2	217277980	217304026	ENSG00000233143	217282739	217336120	+
DIRC3-1	chr2	217277980	217304026	ENSG00000251982	217251556	217251875	+	RN7SK pseudogene 43 [Source:HGNC Symbol;Acc:HGNC:45767]	RN7SKP43
DIRC3-1	chr2	217277980	217304026	ENSG00000259855	216995906	216996490	+	novel transcript	AC007749.1
DIRC3-1	chr2	217277980	217304026	ENSG00000278004	217283370	217283523	+		AC009492.1
DIRC3-1	chr2	217277980	217304026	ENSG00000278004	217283370	217283523	+		AC009492.1
DIRC3-1	chr2	217277980	217305445	ENSG00000233143	217282739	217336120	+
DIRC3-1	chr2	217277980	217305445	ENSG00000251982	217251556	217251875	+	RN7SK pseudogene 43 [Source:HGNC Symbol;Acc:HGNC:45767]	RN7SKP43
DIRC3-1	chr2	217277980	217305445	ENSG00000259855	216995906	216996490	+	novel transcript	AC007749.1
DIRC3-1	chr2	217277980	217305445	ENSG00000278004	217283370	217283523	+		AC009492.1
DIRC3-1	chr2	217277980	217309405	ENSG00000233143	217282739	217336120	+
DIRC3-1	chr2	217277980	217309405	ENSG00000251982	217251556	217251875	+	RN7SK pseudogene 43 [Source:HGNC Symbol;Acc:HGNC:45767]	RN7SKP43
DIRC3-1	chr2	217277980	217309405	ENSG00000259855	216995906	216996490	+	novel transcript	AC007749.1
DIRC3-1	chr2	217277980	217309405	ENSG00000278004	217283370	217283523	+		AC009492.1
DIRC3-1	chr2	217282684	217317893	ENSG00000233143	217282739	217336120	+
DIRC3-1	chr2	217282684	217317893	ENSG00000251982	217251556	217251875	+	RN7SK pseudogene 43 [Source:HGNC Symbol;Acc:HGNC:45767]	RN7SKP43
DIRC3-1	chr2	217282684	217317893	ENSG00000259855	216995906	216996490	+	novel transcript	AC007749.1
DIRC3-1	chr2	217282684	217317893	ENSG00000278004	217283370	217283523	+		AC009492.1
EIF4E-1	chr4	98877880	98897648	ENSG00000151247	98871684	98930637	-	eukaryotic translation initiation factor 4E [Source:HGNC Symbol;Acc:HGNC:3287]	EIF4E
EIF4E-1	chr4	98877880	98897648	ENSG00000164024	98995620	99062813	+
EIF4E-1	chr4	98877880	98897648	ENSG00000197894	99070978	99088801	-
EIF4E-1	chr4	98877880	98897648	ENSG00000198099	99123657	99157792	-
EIF4E-1	chr4	98877880	98897648	ENSG00000214886	98955982	98956767	+	family with sequence similarity 177 member A1 pseudogene 1 [Source:HGNC Symbol;Acc:HGNC:34441]	FAM177A1P1
EIF4E-1	chr4	98877880	98897648	ENSG00000227118	98740742	98741231	+	basic transcription factor 3 pseudogene 13 [Source:HGNC Symbol;Acc:HGNC:1128]	BTF3P13
EIF4E-1	chr4	98877880	98897648	ENSG00000249055	98909537	98909848	-	tubulin folding cofactor A pseudogene 3 [Source:HGNC Symbol;Acc:HGNC:42632]	TBCAP3
EIF4E-1	chr4	98877880	98897648	ENSG00000249065	99160514	99161645	-	proliferating cell nuclear antigen pseudogene 1 [Source:HGNC Symbol;Acc:HGNC:8732]	PCNAP1
EIF4E-1	chr4	98877880	98897648	ENSG00000249764	98713804	98713971	-	translocase of outer mitochondrial membrane 7 homolog (yeast) (TOMM7) pseudogene	AC114811.1
EIF4E-1	chr4	98877880	98897648	ENSG00000250496	99022311	99023131	-	activator of basal transcription 1 pseudogene 1 [Source:HGNC Symbol;Acc:HGNC:39557]	ABT1P1
EIF4E-1	chr4	98877880	98897648	ENSG00000251437	98976800	98977117	-	NADH:ubiquinone oxidoreductase subunit S5 pseudogene 4 [Source:HGNC Symbol;Acc:HGNC:44042]	NDUFS5P4
EIF4E-1	chr4	98877880	98897648	ENSG00000252548	98966815	98966873	-	RNA, U7 small nuclear 149 pseudogene [Source:HGNC Symbol;Acc:HGNC:45683]	RNU7-149P
EIF4E-1	chr4	98877880	98897648	ENSG00000260641	98658904	98664550	+	novel transcript, antisense TSPAN5	AC114811.2
EIF4E-1	chr4	98877880	98897648	ENSG00000263923	98928897	98994994	+	novel transcript, antisense to EIF4E	AC019131.1
EIF4E-1	chr4	98877880	98897648	ENSG00000265213	98997387	98997460	+	microRNA 3684 [Source:HGNC Symbol;Acc:HGNC:38950]	MIR3684
EIF4E-1	chr4	98877880	98897648	ENSG00000272777	99067256	99068125	-	novel transcript	AC019131.2
ELK4-1	chr1	205631916	205632705	ENSG00000069275	205712819	205750276	-
ELK4-1	chr1	205631916	205632705	ENSG00000117266	205504595	205532793	+	cyclin dependent kinase 18 [Source:HGNC Symbol;Acc:HGNC:8751]	CDK18
ELK4-1	chr1	205631916	205632705	ENSG00000117280	205767986	205775460	-
ELK4-1	chr1	205631916	205632705	ENSG00000133065	205789093	205813748	-
ELK4-1	chr1	205631916	205632705	ENSG00000158711	205597556	205631962	-
ELK4-1	chr1	205631916	205632705	ENSG00000158715	205657851	205680459	-
ELK4-1	chr1	205631916	205632705	ENSG00000162873	205336065	205357090	-
ELK4-1	chr1	205631916	205632705	ENSG00000162877	205828022	205850132	-
ELK4-1	chr1	205631916	205632705	ENSG00000174514	205568885	205602918	+
ELK4-1	chr1	205631916	205632705	ENSG00000186007	205381378	205457091	-
ELK4-1	chr1	205631916	205632705	ENSG00000199059	205448302	205448398	-	microRNA 135b [Source:HGNC Symbol;Acc:HGNC:31760]	MIR135B
ELK4-1	chr1	205631916	205632705	ENSG00000201944	205731221	205731352	-	Small nucleolar RNA SNORA72 [Source:RFAM;Acc:RF00139]	SNORA72
ELK4-1	chr1	205631916	205632705	ENSG00000206762	205595041	205595147	+	RNA, U6 small nuclear 418, pseudogene [Source:HGNC Symbol;Acc:HGNC:47381]	RNU6-418P
ELK4-1	chr1	205631916	205632705	ENSG00000224717	205455929	205469024	+	LEMD1 divergent transcript [Source:HGNC Symbol;Acc:HGNC:27631]	LEMD1-DT
ELK4-1	chr1	205631916	205632705	ENSG00000226235	205373252	205387440	+	LEMD1 antisense RNA 1 [Source:HGNC Symbol;Acc:HGNC:44132]	LEMD1-AS1
ELK4-1	chr1	205631916	205632705	ENSG00000235363	205351247	205351471	+	small nuclear ribonucleoprotein polypeptide G pseudogene 10 [Source:HGNC Symbol;Acc:HGNC:39329]	SNRPGP10
ELK4-1	chr1	205631916	205632705	ENSG00000236942	205625483	205626153	+	GABA(A) receptor-associated protein (GABARAP) pseudogene	AC096533.1
ELK4-1	chr1	205631916	205632705	ENSG00000253097	205566716	205566799	+	RNA, U2 small nuclear 19, pseudogene [Source:HGNC Symbol;Acc:HGNC:48512]	RNU2-19P
ELK4-1	chr1	205631916	205632705	ENSG00000275213	205684018	205684307	+	Metazoan signal recognition particle RNA [Source:RFAM;Acc:RF00017]	Metazoa_SRP
ELK4-1	chr1	205631916	205632705	ENSG00000281406	205434886	205437879	-
FGGY-1	chr1	59289257	59296530	ENSG00000224609	59131936	59208121	-
FGGY-1	chr1	59289257	59296530	ENSG00000228121	58999676	59000494	+	prohibitin pseudogene 3 [Source:HGNC Symbol;Acc:HGNC:8915]	PHBP3
FGGY-1	chr1	59289257	59296530	ENSG00000235215	59055999	59078116	-	novel transcript	AL592431.1
FGGY-1	chr1	59289257	59296530	ENSG00000241042	59054397	59056049	-	novel transcript	AL592431.2
FGGY-1	chr1	59289257	59296530	ENSG00000270457	59289303	59289640	-	novel transcript	AC093424.1
FGGY-1	chr1	59289303	59296874	ENSG00000224609	59131936	59208121	-
FGGY-1	chr1	59289303	59296874	ENSG00000228121	58999676	59000494	+	prohibitin pseudogene 3 [Source:HGNC Symbol;Acc:HGNC:8915]	PHBP3
FGGY-1	chr1	59289303	59296874	ENSG00000235215	59055999	59078116	-	novel transcript	AL592431.1
FGGY-1	chr1	59289303	59296874	ENSG00000241042	59054397	59056049	-	novel transcript	AL592431.2
FGGY-1	chr1	59289303	59296874	ENSG00000270457	59289303	59289640	-	novel transcript	AC093424.1
FGGY-1	chr1	59289322	59296530	ENSG00000224609	59131936	59208121	-
FGGY-1	chr1	59289322	59296530	ENSG00000224609	59131936	59208121	-
FGGY-1	chr1	59289322	59296530	ENSG00000228121	58999676	59000494	+	prohibitin pseudogene 3 [Source:HGNC Symbol;Acc:HGNC:8915]	PHBP3
FGGY-1	chr1	59289322	59296530	ENSG00000235215	59055999	59078116	-	novel transcript	AL592431.1
FGGY-1	chr1	59289322	59296530	ENSG00000241042	59054397	59056049	-	novel transcript	AL592431.2
FGGY-1	chr1	59289322	59296530	ENSG00000270457	59289303	59289640	-	novel transcript	AC093424.1
FGGY-1	chr1	59292644	59296530	ENSG00000224609	59131936	59208121	-
FGGY-1	chr1	59292644	59296530	ENSG00000228121	58999676	59000494	+	prohibitin pseudogene 3 [Source:HGNC Symbol;Acc:HGNC:8915]	PHBP3
FGGY-1	chr1	59292644	59296530	ENSG00000235215	59055999	59078116	-	novel transcript	AL592431.1
FGGY-1	chr1	59292644	59296530	ENSG00000241042	59054397	59056049	-	novel transcript	AL592431.2
FGGY-1	chr1	59292644	59296530	ENSG00000270457	59289303	59289640	-	novel transcript	AC093424.1
FGGY-1	chr1	59294705	59296530	ENSG00000224609	59131936	59208121	-
FGGY-1	chr1	59294705	59296530	ENSG00000228121	58999676	59000494	+	prohibitin pseudogene 3 [Source:HGNC Symbol;Acc:HGNC:8915]	PHBP3
FGGY-1	chr1	59294705	59296530	ENSG00000235215	59055999	59078116	-	novel transcript	AL592431.1
FGGY-1	chr1	59294705	59296530	ENSG00000241042	59054397	59056049	-	novel transcript	AL592431.2
FGGY-1	chr1	59294705	59296530	ENSG00000270457	59289303	59289640	-	novel transcript	AC093424.1
FGGY-1	chr1	59295045	59296381	ENSG00000224609	59131936	59208121	-
FGGY-1	chr1	59295045	59296381	ENSG00000228121	58999676	59000494	+	prohibitin pseudogene 3 [Source:HGNC Symbol;Acc:HGNC:8915]	PHBP3
FGGY-1	chr1	59295045	59296381	ENSG00000235215	59055999	59078116	-	novel transcript	AL592431.1
FGGY-1	chr1	59295045	59296381	ENSG00000241042	59054397	59056049	-	novel transcript	AL592431.2
FGGY-1	chr1	59295045	59296381	ENSG00000270457	59289303	59289640	-	novel transcript	AC093424.1
FGL1-2	chr8	17882043	17882661	ENSG00000078674	17922840	18029944	+
FGL1-2	chr8	17882043	17882661	ENSG00000104760	17864380	17910365	-
FGL1-2	chr8	17882043	17882661	ENSG00000104763	18055992	18084998	-
FGL1-2	chr8	17882043	17882661	ENSG00000129422	17643795	17800917	-	microtubule associated scaffold protein 1 [Source:HGNC Symbol;Acc:HGNC:29789]	MTUS1
FGL1-2	chr8	17882043	17882661	ENSG00000212280	17748118	17748230	+	RNA, 5S ribosomal pseudogene 256 [Source:HGNC Symbol;Acc:HGNC:43156]	RNA5SP256
FGL1-2	chr8	17882043	17882661	ENSG00000245281	18084868	18096394	+
FGL1-2	chr8	17882043	17882661	ENSG00000253168	17703988	17706187	+	novel transcript	AC124069.1
FGL1-2	chr8	17882043	17882661	ENSG00000253215	17882043	17882661	+	novel transcript	AC087273.1
FGL1-2	chr8	17882043	17882661	ENSG00000253384	18088569	18089687	-	family with sequence similarity 175, member A (FAM175A) pseudogene	AC124242.2
FGL1-2	chr8	17882043	17882661	ENSG00000253671	17808941	17820868	+
FGL1-2	chr8	17882043	17882661	ENSG00000253944	17801345	17861069	+	novel transcript	AC027117.2
FGL1-2	chr8	17882043	17882661	ENSG00000254054	17905756	17907887	+
FGL1-2	chr8	17882043	17882661	ENSG00000265520	17681578	17681657	-	microRNA 548v [Source:HGNC Symbol;Acc:HGNC:38302]	MIR548V
FGL1-2	chr8	17882043	17882661	ENSG00000277466	17596312	17596378	-	GRB2-related adaptor protein (GRAP) pseudogene	AP006248.1
FN3KRP-1	chr17	82729164	82734143	ENSG00000141542	82654973	82698728	-
FN3KRP-1	chr17	82729164	82734143	ENSG00000141556	82752064	82945922	+
FN3KRP-1	chr17	82729164	82734143	ENSG00000141560	82716683	82730328	+
FN3KRP-1	chr17	82729164	82734143	ENSG00000141562	82458180	82490537	+
FN3KRP-1	chr17	82729164	82734143	ENSG00000141568	82519713	82644662	+
FN3KRP-1	chr17	82729164	82734143	ENSG00000141579	82829435	82840578	-
FN3KRP-1	chr17	82729164	82734143	ENSG00000141580	82614562	82648553	-
FN3KRP-1	chr17	82729164	82734143	ENSG00000167363	82735575	82751197	+
FN3KRP-1	chr17	82729164	82734143	ENSG00000178927	82442589	82450829	-
FN3KRP-1	chr17	82729164	82734143	ENSG00000261845	82602989	82604178	-	novel transcript, antisense FOXK2	AC124283.1
FN3KRP-1	chr17	82729164	82734143	ENSG00000262147	82587313	82588411	-	novel transcript, antisense FOXK2	AC124283.2
FN3KRP-1	chr17	82729164	82734143	ENSG00000262339	82978525	82981738	+	novel transcript, antisense to B3GNTL1	AC130371.1
FN3KRP-1	chr17	82729164	82734143	ENSG00000262410	82745068	82745709	+	novel transcript, sense intronic FN3K	AC024361.1
FN3KRP-1	chr17	82729164	82734143	ENSG00000262652	82578023	82578616	+	novel transcript, sense intronic FOXK2	AC124283.3
FN3KRP-1	chr17	82729164	82734143	ENSG00000262663	82918282	82918785	+	novel transcript, sense intronic TBCD	AC087222.1
FN3KRP-1	chr17	82729164	82734143	ENSG00000263063	82713908	82716255	-	novel transcript	AC024361.2
FN3KRP-1	chr17	82729164	82734143	ENSG00000263098	82795486	82796095	-	novel transcript, antisense TBCD	AC068014.1
FN3KRP-1	chr17	82729164	82734143	ENSG00000263321	82729164	82734143	-	novel transcript	AC024361.3
FN3KRP-1	chr17	82729164	82734143	ENSG00000265136	82576616	82577391	-	ADP-ribosylation factor-like 2 binding protein (ARL2BP) pseudogene	AC124283.4
FN3KRP-1	chr17	82729164	82734143	ENSG00000265458	82454273	82458521	-
FN3KRP-1	chr17	82729164	82734143	ENSG00000266107	82668233	82668307	-	microRNA 4525 [Source:HGNC Symbol;Acc:HGNC:41903]	MIR4525
FN3KRP-1	chr17	82729164	82734143	ENSG00000266236	82482098	82483388	+	NARF intronic transcript 1 [Source:HGNC Symbol;Acc:HGNC:43651]	NARF-IT1
FN3KRP-1	chr17	82729164	82734143	ENSG00000266445	82476597	82477924	-	NARF antisense RNA 1 [Source:HGNC Symbol;Acc:HGNC:53622]	NARF-AS1
FN3KRP-1	chr17	82729164	82734143	ENSG00000279613	82648849	82650657	+	TEC	AC124283.5
FN3KRP-1	chr17	82729164	82734143	ENSG00000279744	82462601	82464255	+	TEC	AC132938.6
FOXP1-2	chr3	71581721	71628558	ENSG00000163412	71675416	71754773	-
FOXP1-2	chr3	71581721	71628558	ENSG00000163421	71771656	71785206	-
FOXP1-2	chr3	71581721	71628558	ENSG00000170837	71754050	71756496	+
FOXP1-2	chr3	71581721	71628558	ENSG00000221264	71541970	71542089	-	microRNA 1284 [Source:HGNC Symbol;Acc:HGNC:35362]	MIR1284
FOXP1-2	chr3	71581721	71628558	ENSG00000239250	71827177	71827471	+	RNA, 7SL, cytoplasmic 271, pseudogene [Source:HGNC Symbol;Acc:HGNC:46287]	RN7SL271P
FOXP1-2	chr3	71581721	71628558	ENSG00000242094	71570255	71574457	-	FOXP1 intronic transcript 1 [Source:HGNC Symbol;Acc:HGNC:41335]	FOXP1-IT1
FOXP1-2	chr3	71581721	71628558	ENSG00000244203	71289769	71305853	+	FOXP1 antisense RNA 1 [Source:HGNC Symbol;Acc:HGNC:41942]	FOXP1-AS1
FOXP1-2	chr3	71581721	71628558	ENSG00000270562	71584943	71587409	+	novel transcript	AC097634.1
FOXP1-2	chr3	71581721	71628558	ENSG00000274387	71567863	71571112	+	novel transcript, antisense to FOXP1	AC097634.2
FOXP1-2	chr3	71581721	71628558	ENSG00000277855	71581721	71628558	+	novel transcript, antisense to FOXP1	AC097634.3
GTPBP4-1	chr10	971146	988341	ENSG00000047056	1049538	1132297	+
GTPBP4-1	chr10	971146	988341	ENSG00000067064	1039908	1049170	-
GTPBP4-1	chr10	971146	988341	ENSG00000107929	806914	931705	-
GTPBP4-1	chr10	971146	988341	ENSG00000107937	988019	1019936	+
GTPBP4-1	chr10	971146	988341	ENSG00000148377	1018907	1025859	-
GTPBP4-1	chr10	971146	988341	ENSG00000205740	971146	988341	-	uncharacterized LOC107984285 [Source:NCBI gene (formerly Entrezgene);Acc:107984285]	AL359878.1
GTPBP4-1	chr10	971146	988341	ENSG00000229205	1159768	1164672	+
GTPBP4-1	chr10	971146	988341	ENSG00000229869	933026	942743	+	novel transcript	AL359878.2
GTPBP4-1	chr10	971146	988341	ENSG00000231601	743992	744958	+	novel transcript	AL157709.1
GTPBP4-1	chr10	971146	988341	ENSG00000232656	1022666	1044201	+
HEATR5A-1	chr14	31248628	31302739	ENSG00000092148	31100112	31207804	-
HEATR5A-1	chr14	31248628	31302739	ENSG00000100478	31025106	31096450	+
HEATR5A-1	chr14	31248628	31302739	ENSG00000129480	31446036	31457510	-
HEATR5A-1	chr14	31248628	31302739	ENSG00000129493	31291791	31420582	-
HEATR5A-1	chr14	31248628	31302739	ENSG00000199291	31258608	31258709	-	Y RNA [Source:RFAM;Acc:RF00019]	Y_RNA
HEATR5A-1	chr14	31248628	31302739	ENSG00000202402	31244761	31244861	+	Y RNA [Source:RFAM;Acc:RF00019]	Y_RNA
HEATR5A-1	chr14	31248628	31302739	ENSG00000203546	31334312	31457441	-	novel protein	AL139353.1
HEATR5A-1	chr14	31248628	31302739	ENSG00000207440	31142939	31143048	+	RNA, U6 small nuclear 541, pseudogene [Source:HGNC Symbol;Acc:HGNC:47504]	RNU6-541P
HEATR5A-1	chr14	31248628	31302739	ENSG00000207952	31014646	31014742	-	microRNA 624 [Source:HGNC Symbol;Acc:HGNC:32880]	MIR624
HEATR5A-1	chr14	31248628	31302739	ENSG00000214943	31482875	31488142	-
HEATR5A-1	chr14	31248628	31302739	ENSG00000239323	31462795	31463371	-	ribosomal protein L9 (RPL9) pseudogene	AL163973.1
HEATR5A-1	chr14	31248628	31302739	ENSG00000250365	31420286	31452883	+
HEATR5A-1	chr14	31248628	31302739	ENSG00000257155	31558507	31561334	-	novel transcript, antisense to NUBPL	AL163973.2
HEATR5A-1	chr14	31248628	31302739	ENSG00000257831	31248628	31302739	+	novel transcript, antisense to HEATR5A	AL136418.1
HEATR5A-1	chr14	31248628	31302739	ENSG00000258196	31553358	31558498	-	novel transcript, antisense to NUBPL	AL163973.3
HEATR5A-1	chr14	31248628	31302739	ENSG00000258640	31111569	31112239	-	ribosomal protein L21 pseudogene 5 [Source:HGNC Symbol;Acc:HGNC:23541]	RPL21P5
HEATR5A-1	chr14	31248628	31302739	ENSG00000258886	30964347	30964622	+	HIG1 hypoxia inducible domain family member 1A pseudogene 17 [Source:HGNC Symbol;Acc:HGNC:43012]	HIGD1AP17
HEATR5A-1	chr14	31248628	31302739	ENSG00000258968	31018446	31018796	+	intraflagellar transport 20 homolog (Chlamydomonas) (IFT20) pseudogene	AL049830.4
HEATR5A-1	chr14	31248628	31302739	ENSG00000283016	31320224	31320634	-	ATP synthase, H+ transporting, mitochondrial Fo complex, subunit C1 (subunit 9) (ATP5G1) pseudogene	AL139353.3
HIBCH-1	chr2	190243060	190281653	ENSG00000138379	190055697	190062729	-
HIBCH-1	chr2	190243060	190281653	ENSG00000151689	190343470	190371665	+
HIBCH-1	chr2	190243060	190281653	ENSG00000151690	190408355	190509205	+
HIBCH-1	chr2	190243060	190281653	ENSG00000189362	190504342	190534722	-
HIBCH-1	chr2	190243060	190281653	ENSG00000198130	190189735	190344193	-
HIBCH-1	chr2	190243060	190281653	ENSG00000233654	190534855	190568102	+
HIBCH-1	chr2	190243060	190281653	ENSG00000251935	190553264	190553480	-	RN7SK pseudogene 179 [Source:HGNC Symbol;Acc:HGNC:45903]	RN7SKP179
HIBCH-1	chr2	190243060	190281653	ENSG00000272979	190454092	190454521	-	novel transcript, antisense to MFSD6	AC093388.1
IL17D-1	chr13	20698843	20703718	ENSG00000032742	20567069	20691437	+	intraflagellar transport 88 [Source:HGNC Symbol;Acc:HGNC:20606]	IFT88
IL17D-1	chr13	20698843	20703718	ENSG00000132953	20777329	20903048	-	exportin 4 [Source:HGNC Symbol;Acc:HGNC:17796]	XPO4
IL17D-1	chr13	20698843	20703718	ENSG00000150456	20728731	20773958	-
IL17D-1	chr13	20698843	20703718	ENSG00000165475	20403667	20525857	-
IL17D-1	chr13	20698843	20703718	ENSG00000172458	20702127	20723098	+	interleukin 17D [Source:HGNC Symbol;Acc:HGNC:5984]	IL17D
IL17D-1	chr13	20698843	20703718	ENSG00000213621	20961310	20962195	+	ribosomal protein SA pseudogene 54 [Source:HGNC Symbol;Acc:HGNC:36373]	RPSAP54
IL17D-1	chr13	20698843	20703718	ENSG00000222726	20612161	20612338	+	RNA, U2 small nuclear 7, pseudogene [Source:HGNC Symbol;Acc:HGNC:42505]	RNU2-7P
IL17D-1	chr13	20698843	20703718	ENSG00000233524	20747035	20748057	-	RAN pseudogene 8 [Source:HGNC Symbol;Acc:HGNC:39863]	RANP8
IL17D-1	chr13	20698843	20703718	ENSG00000233780	20938564	20949599	-	heterogeneous nuclear ribonucleoprotein A1 pseudogene 30 [Source:HGNC Symbol;Acc:HGNC:39548]	HNRNPA1P30
IL17D-1	chr13	20698843	20703718	ENSG00000234363	20956179	20956443	-	peptidylprolyl isomerase A pseudogene 27 [Source:HGNC Symbol;Acc:HGNC:42646]	PPIAP27
IL17D-1	chr13	20698843	20703718	ENSG00000236704	20921664	20923233	-	CCR4-NOT transcription complex subunit 4 pseudogene 1 [Source:HGNC Symbol;Acc:HGNC:39272]	CNOT4P1
IL17D-1	chr13	20698843	20703718	ENSG00000238286	20607268	20608131	+	solute carrier family 35 member E1 pseudogene 1 [Source:HGNC Symbol;Acc:HGNC:42046]	SLC35E1P1
IL17D-1	chr13	20698843	20703718	ENSG00000263978	20433778	20433846	-	microRNA 4499 [Source:HGNC Symbol;Acc:HGNC:41739]	MIR4499
IL17D-1	chr13	20698843	20703718	ENSG00000275485	20768876	20769375	-	novel transcript, sense intronic to N6AMT2	AL512652.1
IL17D-1	chr13	20698843	20703718	ENSG00000277020	20564708	20567045	-	novel transcript, antisense to IFT88	AL590096.1
IL17D-1	chr13	20698843	20703718	ENSG00000278291	20699307	20703718	-	novel transcript, antisense to IL17D	AL161772.1
IL17D-1	chr13	20698843	20703718	ENSG00000279135	20712431	20714146	+	TEC	AL512652.2
IPO7-2	chr11	9416986	9417297	ENSG00000166471	9280654	9314780	-
IPO7-2	chr11	9416986	9417297	ENSG00000166478	9460319	9528524	+
IPO7-2	chr11	9416986	9417297	ENSG00000166483	9573681	9593457	+
IPO7-2	chr11	9416986	9417297	ENSG00000184014	9138825	9265390	-
IPO7-2	chr11	9416986	9417297	ENSG00000201564	9680924	9681238	+	RN7SK pseudogene 50 [Source:HGNC Symbol;Acc:HGNC:45774]	RN7SKP50
IPO7-2	chr11	9416986	9417297	ENSG00000201998	9428773	9428954	+	small nucleolar RNA, H/ACA box 23 [Source:HGNC Symbol;Acc:HGNC:32613]	SNORA23
IPO7-2	chr11	9416986	9417297	ENSG00000205339	9384622	9448126	+
IPO7-2	chr11	9416986	9417297	ENSG00000238387	9578028	9578131	+		AC122179.1
IPO7-2	chr11	9416986	9417297	ENSG00000239470	9660438	9660920	+	ribosomal protein L21 (RPL21) pseudogene	AC011979.1
IPO7-2	chr11	9416986	9417297	ENSG00000243964	9606142	9606609	+	ribosomal protein L23a pseudogene 65 [Source:HGNC Symbol;Acc:HGNC:36289]	RPL23AP65
IPO7-2	chr11	9416986	9417297	ENSG00000254397	9430356	9433486	-	novel transcript	AC132192.1
IPO7-2	chr11	9416986	9417297	ENSG00000254884	9311284	9311689	-	proline rich 13 pseudogene 2 [Source:HGNC Symbol;Acc:HGNC:50615]	PRR13P2
IPO7-2	chr11	9416986	9417297	ENSG00000255097	9242448	9245509	-	novel transcript	AP006259.1
IPO7-2	chr11	9416986	9417297	ENSG00000255463	9631008	9631359	-	chondroitin sulfate synthase 1 (CHSY1) pseudogene	AC011979.2
IPO7-2	chr11	9416986	9417297	ENSG00000268403	9459556	9460702	-	novel transcript, antisense to ZNF143	AC132192.2
IPO7-2	chr11	9416986	9417297	ENSG00000273725	9279532	9279816	-	Metazoan signal recognition particle RNA [Source:RFAM;Acc:RF00017]	Metazoa_SRP
ITCH-1	chr20	34509543	34510010	ENSG00000078747	34363235	34511393	+
ITCH-1	chr20	34509543	34510010	ENSG00000078804	34704290	34713439	+
ITCH-1	chr20	34509543	34510010	ENSG00000101444	34280268	34311802	-
ITCH-1	chr20	34509543	34510010	ENSG00000101460	34546854	34560345	+
ITCH-1	chr20	34509543	34510010	ENSG00000101464	34560542	34698790	-
ITCH-1	chr20	34509543	34510010	ENSG00000125971	34516409	34540958	+	dynein light chain roadblock-type 1 [Source:HGNC Symbol;Acc:HGNC:15468]	DYNLRB1
ITCH-1	chr20	34509543	34510010	ENSG00000181741	34475924	34476474	-	ferredoxin 1 pseudogene 1 [Source:HGNC Symbol;Acc:HGNC:3640]	FDX1P1
ITCH-1	chr20	34509543	34510010	ENSG00000201498	34384165	34384265	-	Y RNA [Source:RFAM;Acc:RF00019]	Y_RNA
ITCH-1	chr20	34509543	34510010	ENSG00000206582	34526510	34526606	-	Y RNA [Source:RFAM;Acc:RF00019]	Y_RNA
ITCH-1	chr20	34509543	34510010	ENSG00000207997	34466325	34466418	+	microRNA 644a [Source:HGNC Symbol;Acc:HGNC:32900]	MIR644A
ITCH-1	chr20	34509543	34510010	ENSG00000214185	34213495	34215892	-	exportin for tRNA pseudogene 1 [Source:HGNC Symbol;Acc:HGNC:16586]	XPOTP1
ITCH-1	chr20	34509543	34510010	ENSG00000231034	34688688	34688978	+	cytochrome c oxidase III (MTCO3) pseudogene	AL118520.1
ITCH-1	chr20	34509543	34510010	ENSG00000231795	34450930	34454552	+	ITCH intronic transcript 1 [Source:HGNC Symbol;Acc:HGNC:41397]	ITCH-IT1
ITCH-1	chr20	34509543	34510010	ENSG00000234087	34347671	34347785	-	pseudogene similar to part of laminin receptor 1 (ribosomal protein SA, 67kDa) LAMR1	AL356299.1
ITCH-1	chr20	34509543	34510010	ENSG00000234933	34402149	34402696	-	cell division cycle 42 pseudogene 1 [Source:HGNC Symbol;Acc:HGNC:16339]	CDC42P1
ITCH-1	chr20	34509543	34510010	ENSG00000236388	34441592	34442025	-	ITCH antisense RNA 1 [Source:HGNC Symbol;Acc:HGNC:40659]	ITCH-AS1
ITCH-1	chr20	34509543	34510010	ENSG00000236456	34245953	34246537	-	density-regulated protein (DENR) pseudogene	AL035458.1
ITCH-1	chr20	34509543	34510010	ENSG00000250917	34234840	34281173	-	novel transcript, overlapping AHCY	AL035458.2
ITCH-1	chr20	34509543	34510010	ENSG00000272945	34281632	34286466	-	novel transcript	AL356299.2
ITCH-1	chr20	34509543	34510010	ENSG00000277558	34476205	34476787	+	novel transcript, sense intronic to ITCH	AL109923.1
KCNAB1-1	chr3	156523740	156524247	ENSG00000114850	156540140	156555184	-
KCNAB1-1	chr3	156523740	156524247	ENSG00000163659	156673235	156706770	+
KCNAB1-1	chr3	156523740	156524247	ENSG00000174912	156713884	156714928	-	methyltransferase like 15 pseudogene 1 [Source:HGNC Symbol;Acc:HGNC:31926]	METTL15P1
KCNAB1-1	chr3	156523740	156524247	ENSG00000230457	156809551	156810732	-	proliferation-associated 2G4 pseudogene 4 [Source:HGNC Symbol;Acc:HGNC:32217]	PA2G4P4
KCNAB1-1	chr3	156523740	156524247	ENSG00000240875	156747346	156817062	-
KCNAB1-1	chr3	156523740	156524247	ENSG00000242370	156441157	156446905	-	KCNAB1 antisense RNA 1 [Source:HGNC Symbol;Acc:HGNC:40316]	KCNAB1-AS1
KCNAB1-1	chr3	156523740	156524247	ENSG00000243926	156671862	156674378	-
KCNAB1-1	chr3	156523740	156524247	ENSG00000272990	156523740	156524247	-	novel transcript, antisense to KCNAB1	AC084036.1
KIAA0100-2	chr17	28598790	28617377	ENSG00000004139	28364356	28404049	+
KIAA0100-2	chr17	28598790	28617377	ENSG00000004142	28347177	28357522	-
KIAA0100-2	chr17	28598790	28617377	ENSG00000007202	28614440	28645454	-
KIAA0100-2	chr17	28598790	28617377	ENSG00000007216	28473293	28497781	+
KIAA0100-2	chr17	28598790	28617377	ENSG00000076351	28394756	28407197	-
KIAA0100-2	chr17	28598790	28617377	ENSG00000076382	28577565	28599279	-
KIAA0100-2	chr17	28598790	28617377	ENSG00000076604	28743984	28750958	+
KIAA0100-2	chr17	28598790	28617377	ENSG00000087111	28553383	28571872	-
KIAA0100-2	chr17	28598790	28617377	ENSG00000109072	28367276	28373091	-
KIAA0100-2	chr17	28598790	28617377	ENSG00000109079	28335602	28347009	+
KIAA0100-2	chr17	28598790	28617377	ENSG00000109083	28328325	28335489	-
KIAA0100-2	chr17	28598790	28617377	ENSG00000109084	28319095	28328685	+
KIAA0100-2	chr17	28598790	28617377	ENSG00000109101	28506243	28538896	+	forkhead box N1 [Source:HGNC Symbol;Acc:HGNC:12765]	FOXN1
KIAA0100-2	chr17	28598790	28617377	ENSG00000109103	28546707	28552668	-
KIAA0100-2	chr17	28598790	28617377	ENSG00000109107	28573115	28577264	-
KIAA0100-2	chr17	28598790	28617377	ENSG00000109111	28662091	28702684	+
KIAA0100-2	chr17	28598790	28617377	ENSG00000109113	28714281	28718429	-
KIAA0100-2	chr17	28598790	28617377	ENSG00000132581	28648356	28662189	-
KIAA0100-2	chr17	28598790	28617377	ENSG00000132589	28879335	28897679	-
KIAA0100-2	chr17	28598790	28617377	ENSG00000132591	28854938	28861067	+
KIAA0100-2	chr17	28598790	28617377	ENSG00000160602	28725897	28743455	+
KIAA0100-2	chr17	28598790	28617377	ENSG00000160606	28724348	28727935	-
KIAA0100-2	chr17	28598790	28617377	ENSG00000167524	28607964	28614200	-
KIAA0100-2	chr17	28598790	28617377	ENSG00000167525	28703197	28711854	-
KIAA0100-2	chr17	28598790	28617377	ENSG00000167536	28897781	28903071	-
KIAA0100-2	chr17	28598790	28617377	ENSG00000173065	28755978	28855232	-	family with sequence similarity 222 member B [Source:HGNC Symbol;Acc:HGNC:25563]	FAM222B
KIAA0100-2	chr17	28598790	28617377	ENSG00000198242	28719393	28724359	+
KIAA0100-2	chr17	28598790	28617377	ENSG00000227543	28598790	28617377	+
KIAA0100-2	chr17	28598790	28617377	ENSG00000238423	28720550	28720616	+	small nucleolar RNA, C/D box 42B [Source:HGNC Symbol;Acc:HGNC:10181]	SNORD42B
KIAA0100-2	chr17	28598790	28617377	ENSG00000238516	28834722	28834822	+	Y RNA [Source:RFAM;Acc:RF00019]	Y_RNA
KIAA0100-2	chr17	28598790	28617377	ENSG00000238578	28722582	28722653	+	small nucleolar RNA, C/D box 4A [Source:HGNC Symbol;Acc:HGNC:10097]	SNORD4A
KIAA0100-2	chr17	28598790	28617377	ENSG00000238597	28723682	28723753	+	small nucleolar RNA, C/D box 4B [Source:HGNC Symbol;Acc:HGNC:10098]	SNORD4B
KIAA0100-2	chr17	28598790	28617377	ENSG00000238649	28723429	28723492	+	small nucleolar RNA, C/D box 42A [Source:HGNC Symbol;Acc:HGNC:10180]	SNORD42A
KIAA0100-2	chr17	28598790	28617377	ENSG00000240494	28655557	28655983	+	ribosomal protein S12 pseudogene 28 [Source:HGNC Symbol;Acc:HGNC:36972]	RPS12P28
KIAA0100-2	chr17	28598790	28617377	ENSG00000243053	28802444	28802822	+	ribosomal protein L31 pseudogene 58 [Source:HGNC Symbol;Acc:HGNC:35862]	RPL31P58
KIAA0100-2	chr17	28598790	28617377	ENSG00000244045	28357581	28363683	+
KIAA0100-2	chr17	28598790	28617377	ENSG00000258472	28455752	28614197	-
KIAA0100-2	chr17	28598790	28617377	ENSG00000258924	28357647	28381697	+	novel transcript readthrough between TMEM199 and SARM1	AC002094.1
KIAA0100-2	chr17	28598790	28617377	ENSG00000263266	28467822	28468406	+	ribosomal protein S7 pseudogene 1 [Source:HGNC Symbol;Acc:HGNC:17081]	RPS7P1
KIAA0100-2	chr17	28598790	28617377	ENSG00000263870	28444063	28445563	-	RAP1A, member of RAS oncogene family (RAP1A) pseudogene	AC015917.1
KIAA0100-2	chr17	28598790	28617377	ENSG00000264044	28633206	28635950	+	novel transcript, antisense to KIAA0100	AC005726.2
KIAA0100-2	chr17	28598790	28617377	ENSG00000264066	28861072	28861966	-	novel transcript	AC024267.1
KIAA0100-2	chr17	28598790	28617377	ENSG00000264138	28848860	28849592	+	novel pseudogene	AC024267.2
KIAA0100-2	chr17	28598790	28617377	ENSG00000264304	28892469	28893342	+	novel transcript, antisense to FLOT2	AC024267.3
KIAA0100-2	chr17	28598790	28617377	ENSG00000264577	28721487	28722877	-	novel transcript, antisense to RPL23A	AC010761.1
KIAA0100-2	chr17	28598790	28617377	ENSG00000264608	28601827	28602284	-
KIAA0100-2	chr17	28598790	28617377	ENSG00000265073	28732963	28743102	-	novel transcript, antisense to NEK8	AC010761.2
KIAA0100-2	chr17	28598790	28617377	ENSG00000265168	28573117	28574243	+	novel transcript, antisense to ALDOC	AC005726.3
KIAA0100-2	chr17	28598790	28617377	ENSG00000265205	28670054	28672804	-	novel transcript, antisense to SUPT6H	AC010761.3
KIAA0100-2	chr17	28598790	28617377	ENSG00000265254	28405240	28406796	+	novel transcript, antisense to SLC46A1	AC015917.2
KIAA0100-2	chr17	28598790	28617377	ENSG00000265287	28607963	28609730	+	novel transcript, antisense to novel protein	AC005726.4
KIAA0100-2	chr17	28598790	28617377	ENSG00000265474	28745569	28747652	-	novel transcript, antisense to TRAF4	AC010761.4
KIAA0100-2	chr17	28598790	28617377	ENSG00000265541	28416922	28417492	+	H3 histone pseudogene 41 [Source:HGNC Symbol;Acc:HGNC:42979]	H3P41
KIAA0100-2	chr17	28598790	28617377	ENSG00000265618	28361601	28362859	-	novel transcript, antisense to TMEM199	AC002094.2
KIAA0100-2	chr17	28598790	28617377	ENSG00000265840	28749731	28750079	-	novel transcript, antisense to TRAF4	AC010761.5
KIAA0100-2	chr17	28598790	28617377	ENSG00000266642	28897738	28899402	+	novel transcript, antisense to DHRS13	AC024267.6
KIAA0100-2	chr17	28598790	28617377	ENSG00000267729	28727258	28727739	+	novel transcript, antisense to TLCD1	AC010761.6
KIAA0100-2	chr17	28598790	28617377	ENSG00000273171	28364288	28368012	-	novel protein, readthrough between VTN and SEBOX	AC002094.3
KIAA0100-2	chr17	28598790	28617377	ENSG00000274529	28364268	28365244	-	SEBOX homeobox [Source:HGNC Symbol;Acc:HGNC:32942]	SEBOX
KIAA0100-2	chr17	28598790	28617377	ENSG00000277450	28373256	28373562	+	novel transcript, sense intronic to transcript readthrough between TMEM199 and SARM1	AC002094.4
KIAA0100-2	chr17	28598790	28617377	ENSG00000279532	28373673	28374301	-	novel transcript	AC002094.5
KIAA0100-2	chr17	28598790	28617377	ENSG00000283364	28861371	28861438	+	microRNA 451b [Source:HGNC Symbol;Acc:HGNC:41655]	MIR451B
KIAA0100-2	chr17	28598790	28617377	ENSG00000283819	28861533	28861618	-	microRNA 144 [Source:HGNC Symbol;Acc:HGNC:31531]	MIR144
KIAA0100-2	chr17	28598790	28617377	ENSG00000284085	28861655	28861730	-	microRNA 4732 [Source:HGNC Symbol;Acc:HGNC:41639]	MIR4732
KIAA0100-2	chr17	28598790	28617377	ENSG00000284532	28360654	28360734	+	microRNA 4723 [Source:HGNC Symbol;Acc:HGNC:41660]	MIR4723
KIAA0100-2	chr17	28598790	28617377	ENSG00000284565	28861369	28861440	-	microRNA 451a [Source:HGNC Symbol;Acc:HGNC:32053]	MIR451A
KIAA0100-2	chr17	28599156	28616526	ENSG00000004139	28364356	28404049	+
KIAA0100-2	chr17	28599156	28616526	ENSG00000004142	28347177	28357522	-
KIAA0100-2	chr17	28599156	28616526	ENSG00000007202	28614440	28645454	-
KIAA0100-2	chr17	28599156	28616526	ENSG00000007216	28473293	28497781	+
KIAA0100-2	chr17	28599156	28616526	ENSG00000076351	28394756	28407197	-
KIAA0100-2	chr17	28599156	28616526	ENSG00000076382	28577565	28599279	-
KIAA0100-2	chr17	28599156	28616526	ENSG00000076604	28743984	28750958	+
KIAA0100-2	chr17	28599156	28616526	ENSG00000087111	28553383	28571872	-
KIAA0100-2	chr17	28599156	28616526	ENSG00000109072	28367276	28373091	-
KIAA0100-2	chr17	28599156	28616526	ENSG00000109079	28335602	28347009	+
KIAA0100-2	chr17	28599156	28616526	ENSG00000109083	28328325	28335489	-
KIAA0100-2	chr17	28599156	28616526	ENSG00000109084	28319095	28328685	+
KIAA0100-2	chr17	28599156	28616526	ENSG00000109101	28506243	28538896	+	forkhead box N1 [Source:HGNC Symbol;Acc:HGNC:12765]	FOXN1
KIAA0100-2	chr17	28599156	28616526	ENSG00000109103	28546707	28552668	-
KIAA0100-2	chr17	28599156	28616526	ENSG00000109107	28573115	28577264	-
KIAA0100-2	chr17	28599156	28616526	ENSG00000109111	28662091	28702684	+
KIAA0100-2	chr17	28599156	28616526	ENSG00000109113	28714281	28718429	-
KIAA0100-2	chr17	28599156	28616526	ENSG00000132581	28648356	28662189	-
KIAA0100-2	chr17	28599156	28616526	ENSG00000132589	28879335	28897679	-
KIAA0100-2	chr17	28599156	28616526	ENSG00000132591	28854938	28861067	+
KIAA0100-2	chr17	28599156	28616526	ENSG00000160602	28725897	28743455	+
KIAA0100-2	chr17	28599156	28616526	ENSG00000160606	28724348	28727935	-
KIAA0100-2	chr17	28599156	28616526	ENSG00000167524	28607964	28614200	-
KIAA0100-2	chr17	28599156	28616526	ENSG00000167525	28703197	28711854	-
KIAA0100-2	chr17	28599156	28616526	ENSG00000167536	28897781	28903071	-
KIAA0100-2	chr17	28599156	28616526	ENSG00000173065	28755978	28855232	-	family with sequence similarity 222 member B [Source:HGNC Symbol;Acc:HGNC:25563]	FAM222B
KIAA0100-2	chr17	28599156	28616526	ENSG00000198242	28719393	28724359	+
KIAA0100-2	chr17	28599156	28616526	ENSG00000227543	28598790	28617377	+
KIAA0100-2	chr17	28599156	28616526	ENSG00000238423	28720550	28720616	+	small nucleolar RNA, C/D box 42B [Source:HGNC Symbol;Acc:HGNC:10181]	SNORD42B
KIAA0100-2	chr17	28599156	28616526	ENSG00000238516	28834722	28834822	+	Y RNA [Source:RFAM;Acc:RF00019]	Y_RNA
KIAA0100-2	chr17	28599156	28616526	ENSG00000238578	28722582	28722653	+	small nucleolar RNA, C/D box 4A [Source:HGNC Symbol;Acc:HGNC:10097]	SNORD4A
KIAA0100-2	chr17	28599156	28616526	ENSG00000238597	28723682	28723753	+	small nucleolar RNA, C/D box 4B [Source:HGNC Symbol;Acc:HGNC:10098]	SNORD4B
KIAA0100-2	chr17	28599156	28616526	ENSG00000238649	28723429	28723492	+	small nucleolar RNA, C/D box 42A [Source:HGNC Symbol;Acc:HGNC:10180]	SNORD42A
KIAA0100-2	chr17	28599156	28616526	ENSG00000240494	28655557	28655983	+	ribosomal protein S12 pseudogene 28 [Source:HGNC Symbol;Acc:HGNC:36972]	RPS12P28
KIAA0100-2	chr17	28599156	28616526	ENSG00000243053	28802444	28802822	+	ribosomal protein L31 pseudogene 58 [Source:HGNC Symbol;Acc:HGNC:35862]	RPL31P58
KIAA0100-2	chr17	28599156	28616526	ENSG00000244045	28357581	28363683	+
KIAA0100-2	chr17	28599156	28616526	ENSG00000258472	28455752	28614197	-
KIAA0100-2	chr17	28599156	28616526	ENSG00000258924	28357647	28381697	+	novel transcript readthrough between TMEM199 and SARM1	AC002094.1
KIAA0100-2	chr17	28599156	28616526	ENSG00000263266	28467822	28468406	+	ribosomal protein S7 pseudogene 1 [Source:HGNC Symbol;Acc:HGNC:17081]	RPS7P1
KIAA0100-2	chr17	28599156	28616526	ENSG00000263870	28444063	28445563	-	RAP1A, member of RAS oncogene family (RAP1A) pseudogene	AC015917.1
KIAA0100-2	chr17	28599156	28616526	ENSG00000264044	28633206	28635950	+	novel transcript, antisense to KIAA0100	AC005726.2
KIAA0100-2	chr17	28599156	28616526	ENSG00000264066	28861072	28861966	-	novel transcript	AC024267.1
KIAA0100-2	chr17	28599156	28616526	ENSG00000264138	28848860	28849592	+	novel pseudogene	AC024267.2
KIAA0100-2	chr17	28599156	28616526	ENSG00000264304	28892469	28893342	+	novel transcript, antisense to FLOT2	AC024267.3
KIAA0100-2	chr17	28599156	28616526	ENSG00000264577	28721487	28722877	-	novel transcript, antisense to RPL23A	AC010761.1
KIAA0100-2	chr17	28599156	28616526	ENSG00000264608	28601827	28602284	-
KIAA0100-2	chr17	28599156	28616526	ENSG00000265073	28732963	28743102	-	novel transcript, antisense to NEK8	AC010761.2
KIAA0100-2	chr17	28599156	28616526	ENSG00000265168	28573117	28574243	+	novel transcript, antisense to ALDOC	AC005726.3
KIAA0100-2	chr17	28599156	28616526	ENSG00000265205	28670054	28672804	-	novel transcript, antisense to SUPT6H	AC010761.3
KIAA0100-2	chr17	28599156	28616526	ENSG00000265254	28405240	28406796	+	novel transcript, antisense to SLC46A1	AC015917.2
KIAA0100-2	chr17	28599156	28616526	ENSG00000265287	28607963	28609730	+	novel transcript, antisense to novel protein	AC005726.4
KIAA0100-2	chr17	28599156	28616526	ENSG00000265474	28745569	28747652	-	novel transcript, antisense to TRAF4	AC010761.4
KIAA0100-2	chr17	28599156	28616526	ENSG00000265541	28416922	28417492	+	H3 histone pseudogene 41 [Source:HGNC Symbol;Acc:HGNC:42979]	H3P41
KIAA0100-2	chr17	28599156	28616526	ENSG00000265618	28361601	28362859	-	novel transcript, antisense to TMEM199	AC002094.2
KIAA0100-2	chr17	28599156	28616526	ENSG00000265840	28749731	28750079	-	novel transcript, antisense to TRAF4	AC010761.5
KIAA0100-2	chr17	28599156	28616526	ENSG00000266642	28897738	28899402	+	novel transcript, antisense to DHRS13	AC024267.6
KIAA0100-2	chr17	28599156	28616526	ENSG00000267729	28727258	28727739	+	novel transcript, antisense to TLCD1	AC010761.6
KIAA0100-2	chr17	28599156	28616526	ENSG00000273171	28364288	28368012	-	novel protein, readthrough between VTN and SEBOX	AC002094.3
KIAA0100-2	chr17	28599156	28616526	ENSG00000274529	28364268	28365244	-	SEBOX homeobox [Source:HGNC Symbol;Acc:HGNC:32942]	SEBOX
KIAA0100-2	chr17	28599156	28616526	ENSG00000277450	28373256	28373562	+	novel transcript, sense intronic to transcript readthrough between TMEM199 and SARM1	AC002094.4
KIAA0100-2	chr17	28599156	28616526	ENSG00000279532	28373673	28374301	-	novel transcript	AC002094.5
KIAA0100-2	chr17	28599156	28616526	ENSG00000283364	28861371	28861438	+	microRNA 451b [Source:HGNC Symbol;Acc:HGNC:41655]	MIR451B
KIAA0100-2	chr17	28599156	28616526	ENSG00000283819	28861533	28861618	-	microRNA 144 [Source:HGNC Symbol;Acc:HGNC:31531]	MIR144
KIAA0100-2	chr17	28599156	28616526	ENSG00000284085	28861655	28861730	-	microRNA 4732 [Source:HGNC Symbol;Acc:HGNC:41639]	MIR4732
KIAA0100-2	chr17	28599156	28616526	ENSG00000284532	28360654	28360734	+	microRNA 4723 [Source:HGNC Symbol;Acc:HGNC:41660]	MIR4723
KIAA0100-2	chr17	28599156	28616526	ENSG00000284565	28861369	28861440	-	microRNA 451a [Source:HGNC Symbol;Acc:HGNC:32053]	MIR451A
KIAA0100-2	chr17	28611932	28617375	ENSG00000004139	28364356	28404049	+
KIAA0100-2	chr17	28611932	28617375	ENSG00000004142	28347177	28357522	-
KIAA0100-2	chr17	28611932	28617375	ENSG00000007202	28614440	28645454	-
KIAA0100-2	chr17	28611932	28617375	ENSG00000007216	28473293	28497781	+
KIAA0100-2	chr17	28611932	28617375	ENSG00000076351	28394756	28407197	-
KIAA0100-2	chr17	28611932	28617375	ENSG00000076382	28577565	28599279	-
KIAA0100-2	chr17	28611932	28617375	ENSG00000076604	28743984	28750958	+
KIAA0100-2	chr17	28611932	28617375	ENSG00000087111	28553383	28571872	-
KIAA0100-2	chr17	28611932	28617375	ENSG00000109072	28367276	28373091	-
KIAA0100-2	chr17	28611932	28617375	ENSG00000109079	28335602	28347009	+
KIAA0100-2	chr17	28611932	28617375	ENSG00000109083	28328325	28335489	-
KIAA0100-2	chr17	28611932	28617375	ENSG00000109084	28319095	28328685	+
KIAA0100-2	chr17	28611932	28617375	ENSG00000109101	28506243	28538896	+	forkhead box N1 [Source:HGNC Symbol;Acc:HGNC:12765]	FOXN1
KIAA0100-2	chr17	28611932	28617375	ENSG00000109103	28546707	28552668	-
KIAA0100-2	chr17	28611932	28617375	ENSG00000109107	28573115	28577264	-
KIAA0100-2	chr17	28611932	28617375	ENSG00000109111	28662091	28702684	+
KIAA0100-2	chr17	28611932	28617375	ENSG00000109113	28714281	28718429	-
KIAA0100-2	chr17	28611932	28617375	ENSG00000132581	28648356	28662189	-
KIAA0100-2	chr17	28611932	28617375	ENSG00000132589	28879335	28897679	-
KIAA0100-2	chr17	28611932	28617375	ENSG00000132591	28854938	28861067	+
KIAA0100-2	chr17	28611932	28617375	ENSG00000160602	28725897	28743455	+
KIAA0100-2	chr17	28611932	28617375	ENSG00000160606	28724348	28727935	-
KIAA0100-2	chr17	28611932	28617375	ENSG00000167524	28607964	28614200	-
KIAA0100-2	chr17	28611932	28617375	ENSG00000167525	28703197	28711854	-
KIAA0100-2	chr17	28611932	28617375	ENSG00000167536	28897781	28903071	-
KIAA0100-2	chr17	28611932	28617375	ENSG00000173065	28755978	28855232	-	family with sequence similarity 222 member B [Source:HGNC Symbol;Acc:HGNC:25563]	FAM222B
KIAA0100-2	chr17	28611932	28617375	ENSG00000198242	28719393	28724359	+
KIAA0100-2	chr17	28611932	28617375	ENSG00000227543	28598790	28617377	+
KIAA0100-2	chr17	28611932	28617375	ENSG00000238423	28720550	28720616	+	small nucleolar RNA, C/D box 42B [Source:HGNC Symbol;Acc:HGNC:10181]	SNORD42B
KIAA0100-2	chr17	28611932	28617375	ENSG00000238516	28834722	28834822	+	Y RNA [Source:RFAM;Acc:RF00019]	Y_RNA
KIAA0100-2	chr17	28611932	28617375	ENSG00000238578	28722582	28722653	+	small nucleolar RNA, C/D box 4A [Source:HGNC Symbol;Acc:HGNC:10097]	SNORD4A
KIAA0100-2	chr17	28611932	28617375	ENSG00000238597	28723682	28723753	+	small nucleolar RNA, C/D box 4B [Source:HGNC Symbol;Acc:HGNC:10098]	SNORD4B
KIAA0100-2	chr17	28611932	28617375	ENSG00000238649	28723429	28723492	+	small nucleolar RNA, C/D box 42A [Source:HGNC Symbol;Acc:HGNC:10180]	SNORD42A
KIAA0100-2	chr17	28611932	28617375	ENSG00000240494	28655557	28655983	+	ribosomal protein S12 pseudogene 28 [Source:HGNC Symbol;Acc:HGNC:36972]	RPS12P28
KIAA0100-2	chr17	28611932	28617375	ENSG00000243053	28802444	28802822	+	ribosomal protein L31 pseudogene 58 [Source:HGNC Symbol;Acc:HGNC:35862]	RPL31P58
KIAA0100-2	chr17	28611932	28617375	ENSG00000244045	28357581	28363683	+
KIAA0100-2	chr17	28611932	28617375	ENSG00000258472	28455752	28614197	-
KIAA0100-2	chr17	28611932	28617375	ENSG00000258924	28357647	28381697	+	novel transcript readthrough between TMEM199 and SARM1	AC002094.1
KIAA0100-2	chr17	28611932	28617375	ENSG00000263266	28467822	28468406	+	ribosomal protein S7 pseudogene 1 [Source:HGNC Symbol;Acc:HGNC:17081]	RPS7P1
KIAA0100-2	chr17	28611932	28617375	ENSG00000263870	28444063	28445563	-	RAP1A, member of RAS oncogene family (RAP1A) pseudogene	AC015917.1
KIAA0100-2	chr17	28611932	28617375	ENSG00000264044	28633206	28635950	+	novel transcript, antisense to KIAA0100	AC005726.2
KIAA0100-2	chr17	28611932	28617375	ENSG00000264066	28861072	28861966	-	novel transcript	AC024267.1
KIAA0100-2	chr17	28611932	28617375	ENSG00000264138	28848860	28849592	+	novel pseudogene	AC024267.2
KIAA0100-2	chr17	28611932	28617375	ENSG00000264304	28892469	28893342	+	novel transcript, antisense to FLOT2	AC024267.3
KIAA0100-2	chr17	28611932	28617375	ENSG00000264577	28721487	28722877	-	novel transcript, antisense to RPL23A	AC010761.1
KIAA0100-2	chr17	28611932	28617375	ENSG00000264608	28601827	28602284	-
KIAA0100-2	chr17	28611932	28617375	ENSG00000265073	28732963	28743102	-	novel transcript, antisense to NEK8	AC010761.2
KIAA0100-2	chr17	28611932	28617375	ENSG00000265168	28573117	28574243	+	novel transcript, antisense to ALDOC	AC005726.3
KIAA0100-2	chr17	28611932	28617375	ENSG00000265205	28670054	28672804	-	novel transcript, antisense to SUPT6H	AC010761.3
KIAA0100-2	chr17	28611932	28617375	ENSG00000265254	28405240	28406796	+	novel transcript, antisense to SLC46A1	AC015917.2
KIAA0100-2	chr17	28611932	28617375	ENSG00000265287	28607963	28609730	+	novel transcript, antisense to novel protein	AC005726.4
KIAA0100-2	chr17	28611932	28617375	ENSG00000265474	28745569	28747652	-	novel transcript, antisense to TRAF4	AC010761.4
KIAA0100-2	chr17	28611932	28617375	ENSG00000265541	28416922	28417492	+	H3 histone pseudogene 41 [Source:HGNC Symbol;Acc:HGNC:42979]	H3P41
KIAA0100-2	chr17	28611932	28617375	ENSG00000265618	28361601	28362859	-	novel transcript, antisense to TMEM199	AC002094.2
KIAA0100-2	chr17	28611932	28617375	ENSG00000265840	28749731	28750079	-	novel transcript, antisense to TRAF4	AC010761.5
KIAA0100-2	chr17	28611932	28617375	ENSG00000266642	28897738	28899402	+	novel transcript, antisense to DHRS13	AC024267.6
KIAA0100-2	chr17	28611932	28617375	ENSG00000267729	28727258	28727739	+	novel transcript, antisense to TLCD1	AC010761.6
KIAA0100-2	chr17	28611932	28617375	ENSG00000273171	28364288	28368012	-	novel protein, readthrough between VTN and SEBOX	AC002094.3
KIAA0100-2	chr17	28611932	28617375	ENSG00000274529	28364268	28365244	-	SEBOX homeobox [Source:HGNC Symbol;Acc:HGNC:32942]	SEBOX
KIAA0100-2	chr17	28611932	28617375	ENSG00000277450	28373256	28373562	+	novel transcript, sense intronic to transcript readthrough between TMEM199 and SARM1	AC002094.4
KIAA0100-2	chr17	28611932	28617375	ENSG00000279532	28373673	28374301	-	novel transcript	AC002094.5
KIAA0100-2	chr17	28611932	28617375	ENSG00000283364	28861371	28861438	+	microRNA 451b [Source:HGNC Symbol;Acc:HGNC:41655]	MIR451B
KIAA0100-2	chr17	28611932	28617375	ENSG00000283819	28861533	28861618	-	microRNA 144 [Source:HGNC Symbol;Acc:HGNC:31531]	MIR144
KIAA0100-2	chr17	28611932	28617375	ENSG00000284085	28861655	28861730	-	microRNA 4732 [Source:HGNC Symbol;Acc:HGNC:41639]	MIR4732
KIAA0100-2	chr17	28611932	28617375	ENSG00000284532	28360654	28360734	+	microRNA 4723 [Source:HGNC Symbol;Acc:HGNC:41660]	MIR4723
KIAA0100-2	chr17	28611932	28617375	ENSG00000284565	28861369	28861440	-	microRNA 451a [Source:HGNC Symbol;Acc:HGNC:32053]	MIR451A
KIAA0355-1	chr19	34348356	34359412	ENSG00000105220	34359480	34402156	+
KIAA0355-1	chr19	34348356	34359412	ENSG00000126249	34404384	34426168	+
KIAA0355-1	chr19	34348356	34359412	ENSG00000126261	34428352	34471251	+
KIAA0355-1	chr19	34348356	34359412	ENSG00000142279	34481638	34512304	+
KIAA0355-1	chr19	34348356	34359412	ENSG00000166398	34254537	34355586	+
KIAA0355-1	chr19	34348356	34359412	ENSG00000186008	34092561	34093310	-	ribosomal protein S4X pseudogene 21 [Source:HGNC Symbol;Acc:HGNC:36228]	RPS4XP21
KIAA0355-1	chr19	34348356	34359412	ENSG00000239210	34533427	34534084	-	ribosomal protein S26 pseudogene 55 [Source:HGNC Symbol;Acc:HGNC:36500]	RPS26P55
KIAA0355-1	chr19	34348356	34359412	ENSG00000248830	34542462	34545395	-	zinc finger protein 807, pseudogene [Source:HGNC Symbol;Acc:HGNC:33229]	ZNF807P
KIAA0355-1	chr19	34348356	34359412	ENSG00000252230	34637696	34637781	-		AC020910.1
KIAA0355-1	chr19	34348356	34359412	ENSG00000257074	34296277	34296592	-	ribosomal protein L29 pseudogene 33 [Source:HGNC Symbol;Acc:HGNC:36923]	RPL29P33
KIAA0355-1	chr19	34348356	34359412	ENSG00000257103	34172504	34229515	+	LSM14A mRNA processing body assembly factor [Source:HGNC Symbol;Acc:HGNC:24489]	LSM14A
KIAA0355-1	chr19	34348356	34359412	ENSG00000264317	34421988	34422311	-	RNA, 7SL, cytoplasmic 154, pseudogene [Source:HGNC Symbol;Acc:HGNC:46170]	RN7SL154P
KIAA0355-1	chr19	34348356	34359412	ENSG00000266953	34396315	34409364	+	novel protein, readthrough between GPI and PDCD2	AC092073.1
KIAA0355-1	chr19	34348356	34359412	ENSG00000267024	34426112	34428273	-	novel transcript, antisense to PDCD2	AC008747.1
KIAA0355-1	chr19	34348356	34359412	ENSG00000267219	34348356	34359412	-	novel transcript, antisense to KIAA0355	AC010504.1
KIAA0355-1	chr19	34348356	34359412	ENSG00000268683	34638122	34640689	-	novel transcript, sense intronic to SCGB2B2	AC020910.2
KIAA0355-1	chr19	34348356	34359412	ENSG00000268751	34576733	34577701	-	secretoglobin family 1B member 2, pseudogene [Source:HGNC Symbol;Acc:HGNC:20741]	SCGB1B2P
KIAA0355-1	chr19	34348356	34359412	ENSG00000269811	34645662	34646070	+	secretoglobin family 2B member 3, pseudogene [Source:HGNC Symbol;Acc:HGNC:31895]	SCGB2B3P
KIAA0355-1	chr19	34348356	34359412	ENSG00000270849	34126973	34127423	+	coiled-coil-helix-coiled-coil-helix domain containing 2 pseudogene 3 [Source:HGNC Symbol;Acc:HGNC:39587]	CHCHD2P3
KIAA0355-1	chr19	34348356	34359412	ENSG00000271049	34634844	34635717	+	small nuclear ribonucleoprotein polypeptide E (SNRPE) pseudogene	AC020910.4
KIAA0355-1	chr19	34348356	34359412	ENSG00000279971	34645380	34646838	+	novel transcript	AC020910.7
LAMA2-1	chr6	129479615	129481410	ENSG00000146376	129576132	129710225	-
LAMA2-1	chr6	129479615	129481410	ENSG00000218689	129756298	129757112	-	ribosomal protein L5 pseudogene 21 [Source:HGNC Symbol;Acc:HGNC:37029]	RPL5P21
LAMA2-1	chr6	129479615	129481410	ENSG00000226149	129526626	129552587	-
LAMA2-1	chr6	129479615	129481410	ENSG00000233351	129479615	129481410	-	novel transcript	AL356124.2
LAMA2-1	chr6	129479615	129481410	ENSG00000252554	129436875	129436980	-	RNA, U6 small nuclear 861, pseudogene [Source:HGNC Symbol;Acc:HGNC:47824]	RNU6-861P
LRIF1-1	chr1	110963302	110964649	ENSG00000064886	111200771	111243440	+
LRIF1-1	chr1	110963302	110964649	ENSG00000121931	110947185	110964079	-
LRIF1-1	chr1	110963302	110964649	ENSG00000134255	111139627	111185102	+
LRIF1-1	chr1	110963302	110964649	ENSG00000143119	110873154	110899928	+
LRIF1-1	chr1	110963302	110964649	ENSG00000156171	111117333	111140216	-	DNA damage regulated autophagy modulator 2 [Source:HGNC Symbol;Acc:HGNC:28769]	DRAM2
LRIF1-1	chr1	110963302	110964649	ENSG00000162777	111187174	111204535	-
LRIF1-1	chr1	110963302	110964649	ENSG00000177272	110672465	110675033	-
LRIF1-1	chr1	110963302	110964649	ENSG00000199710	110764408	110764506	-		AL354713.1
LRIF1-1	chr1	110963302	110964649	ENSG00000225672	111007700	111015530	-	cyclin T2 pseudogene 1 [Source:HGNC Symbol;Acc:HGNC:39178]	CCNT2P1
LRIF1-1	chr1	110963302	110964649	ENSG00000232791	110853938	110854891	+
LRIF1-1	chr1	110963302	110964649	ENSG00000232811	110943467	110952848	+	novel transcript	AL360270.1
LRIF1-1	chr1	110963302	110964649	ENSG00000236040	111250254	111256715	+	chitinase, acidic pseudogene 1 [Source:HGNC Symbol;Acc:HGNC:44462]	CHIAP1
LRIF1-1	chr1	110963302	110964649	ENSG00000237415	110848077	110848941	-	nuclear receptor binding factor 2 pseudogene 3 [Source:HGNC Symbol;Acc:HGNC:44606]	NRBF2P3
LRIF1-1	chr1	110963302	110964649	ENSG00000252760	111041834	111041925	+	RNA, 5S ribosomal pseudogene 54 [Source:HGNC Symbol;Acc:HGNC:42831]	RNA5SP54
LRIF1-1	chr1	110963302	110964649	ENSG00000261654	110936369	110942353	-	novel transcript, sense overlapping C1orf103	AL360270.2
LRIF1-1	chr1	110963302	110964649	ENSG00000272982	111181374	111181491	-	novel transcript, antisense to CEPT1	AL355816.1
LRIF1-1	chr1	110963302	110964649	ENSG00000273010	110963302	110964649	+	novel transcript, antisense to LRIF1	AL360270.3
LRIF1-1	chr1	110963302	110964649	ENSG00000273221	111184415	111185061	-	novel transcript, antisense to CEPT1	AL355816.2
LTA4H-2	chr12	96025323	96027971	ENSG00000084110	95972662	95996365	-
LTA4H-2	chr12	96025323	96027971	ENSG00000111144	96000828	96043520	-
LTA4H-2	chr12	96025323	96027971	ENSG00000111145	96194382	96269835	+
LTA4H-2	chr12	96025323	96027971	ENSG00000139343	95858928	95903828	+	small nuclear ribonucleoprotein polypeptide F [Source:HGNC Symbol;Acc:HGNC:11162]	SNRPF
LTA4H-2	chr12	96025323	96027971	ENSG00000139344	95943293	95968716	+
LTA4H-2	chr12	96025323	96027971	ENSG00000165972	95867048	95942974	-
LTA4H-2	chr12	96025323	96027971	ENSG00000199506	95792529	95792635	-	RNA, U6 small nuclear 247, pseudogene [Source:HGNC Symbol;Acc:HGNC:47210]	RNU6-247P
LTA4H-2	chr12	96025323	96027971	ENSG00000201435	96303375	96303513	-	RNA, U4 small nuclear 24, pseudogene [Source:HGNC Symbol;Acc:HGNC:46960]	RNU4-24P
LTA4H-2	chr12	96025323	96027971	ENSG00000257715	96025323	96027971	+	novel transcript, antisense to LTA4H	AC007298.1
LTA4H-2	chr12	96025323	96027971	ENSG00000257878	95996521	96011489	+	novel transcript, antisense to LTA4H	AC007298.2
LTA4H-2	chr12	96025323	96027971	ENSG00000258177	96222797	96223973	-	novel transcript, antisense to ELK3	AC008149.1
LTA4H-2	chr12	96025323	96027971	ENSG00000258251	96060024	96060375	-	YPEL5 pseudogene 3 [Source:HGNC Symbol;Acc:HGNC:50557]	YPEL5P3
LTA4H-2	chr12	96025323	96027971	ENSG00000258292	95803097	95823307	+	long intergenic non-protein coding RNA 2410 [Source:HGNC Symbol;Acc:HGNC:53339]	LINC02410
LTA4H-2	chr12	96025323	96027971	ENSG00000258343	95795345	95858839	-
LTA4H-2	chr12	96025323	96027971	ENSG00000277062	96101951	96102249	-	RNA, 7SL, cytoplasmic 88, pseudogene [Source:HGNC Symbol;Acc:HGNC:46104]	RN7SL88P
LTA4H-2	chr12	96025323	96027971	ENSG00000283422	96160692	96172126	-	long intergenic non-protein coding RNA 2452 [Source:HGNC Symbol;Acc:HGNC:53384]	LINC02452
MACC1-1	chr7	20136067	20139199	ENSG00000105855	20330702	20415754	+
MACC1-1	chr7	20136067	20139199	ENSG00000183742	20134655	20217404	-
MACC1-1	chr7	20136067	20139199	ENSG00000200753	20377331	20377401	+		AC004130.1
MACC1-1	chr7	20136067	20139199	ENSG00000213860	20002765	20003247	+	ribosomal protein L21 pseudogene 75 [Source:HGNC Symbol;Acc:HGNC:36460]	RPL21P75
MACC1-1	chr7	20136067	20139199	ENSG00000226097	20296708	20311712	+
MACC1-1	chr7	20136067	20139199	ENSG00000228598	20141916	20153531	+	MACC1 antisense RNA 1 [Source:HGNC Symbol;Acc:HGNC:41257]	MACC1-AS1
MACC1-1	chr7	20136067	20139199	ENSG00000233834	20217577	20221700	+	novel transcript	AC005083.1
MACC1-1	chr7	20136067	20139199	ENSG00000243004	19918981	20140453	-
MACC1-1	chr7	20136067	20139199	ENSG00000267055	20096137	20130475	+	novel transcript	AC007001.1
MACC1-1	chr7	20136067	20139199	ENSG00000271133	20328299	20331747	-	novel transcript, antisense to ITGB8	AC004130.2
MUC21-1	chr6	30974961	30983897	ENSG00000137310	31158542	31167159	+
MUC21-1	chr6	30974961	30983897	ENSG00000137312	30727709	30742733	-
MUC21-1	chr6	30974961	30983897	ENSG00000137331	30743199	30744554	-
MUC21-1	chr6	30974961	30983897	ENSG00000137337	30699807	30717889	-
MUC21-1	chr6	30974961	30983897	ENSG00000137404	30688047	30691420	-	nurim [Source:HGNC Symbol;Acc:HGNC:8003]	NRM
MUC21-1	chr6	30974961	30983897	ENSG00000137411	30908242	30926459	+
MUC21-1	chr6	30974961	30983897	ENSG00000146112	30676389	30687895	-
MUC21-1	chr6	30974961	30983897	ENSG00000168631	30934523	30954221	+
MUC21-1	chr6	30974961	30983897	ENSG00000196230	30720201	30725426	+
MUC21-1	chr6	30974961	30983897	ENSG00000196260	30931353	30955636	-
MUC21-1	chr6	30974961	30983897	ENSG00000201988	30736304	30736414	-	Y RNA [Source:RFAM;Acc:RF00019]	Y_RNA
MUC21-1	chr6	30974961	30983897	ENSG00000202241	30864250	30864552	+	RN7SK pseudogene 186 [Source:HGNC Symbol;Acc:HGNC:45910]	RN7SKP186
MUC21-1	chr6	30974961	30983897	ENSG00000204525	31268749	31272130	-	major histocompatibility complex, class I, C [Source:HGNC Symbol;Acc:HGNC:4933]	HLA-C
MUC21-1	chr6	30974961	30983897	ENSG00000204528	31173735	31177899	-	psoriasis susceptibility 1 candidate 3 [Source:HGNC Symbol;Acc:HGNC:17203]	PSORS1C3
MUC21-1	chr6	30974961	30983897	ENSG00000204531	31164337	31180731	-
MUC21-1	chr6	30974961	30983897	ENSG00000204536	31142439	31158238	-
MUC21-1	chr6	30974961	30983897	ENSG00000204538	31137536	31139350	-
MUC21-1	chr6	30974961	30983897	ENSG00000204539	31115090	31120446	-
MUC21-1	chr6	30974961	30983897	ENSG00000204540	31114750	31140092	+
MUC21-1	chr6	30974961	30983897	ENSG00000204542	31111223	31112559	-
MUC21-1	chr6	30974961	30983897	ENSG00000204544	30983718	30989903	+	mucin 21, cell surface associated [Source:HGNC Symbol;Acc:HGNC:21661]	MUC21
MUC21-1	chr6	30974961	30983897	ENSG00000204580	30876421	30900156	+	discoidin domain receptor tyrosine kinase 1 [Source:HGNC Symbol;Acc:HGNC:2730]	DDR1
MUC21-1	chr6	30974961	30983897	ENSG00000206344	31197760	31203968	+	HLA complex group 27 [Source:HGNC Symbol;Acc:HGNC:27366]	HCG27
MUC21-1	chr6	30974961	30983897	ENSG00000213780	30908184	30914106	+
MUC21-1	chr6	30974961	30983897	ENSG00000214892	31275572	31278754	+	USP8 pseudogene 1 [Source:HGNC Symbol;Acc:HGNC:13987]	USP8P1
MUC21-1	chr6	30974961	30983897	ENSG00000214894	30798654	30830659	-	long intergenic non-protein coding RNA 243 [Source:HGNC Symbol;Acc:HGNC:30956]	LINC00243
MUC21-1	chr6	30974961	30983897	ENSG00000222895	31083010	31083109	+	RNA, U6 small nuclear 1133, pseudogene [Source:HGNC Symbol;Acc:HGNC:48096]	RNU6-1133P
MUC21-1	chr6	30974961	30983897	ENSG00000224328	30703067	30713184	+	MDC1 antisense RNA 1 [Source:HGNC Symbol;Acc:HGNC:39764]	MDC1-AS1
MUC21-1	chr6	30974961	30983897	ENSG00000227939	31280317	31281519	+	ribosomal protein L3 pseudogene 2 [Source:HGNC Symbol;Acc:HGNC:17834]	RPL3P2
MUC21-1	chr6	30974961	30983897	ENSG00000228022	30766825	30792250	+
MUC21-1	chr6	30974961	30983897	ENSG00000228789	31053450	31059890	+
MUC21-1	chr6	30974961	30983897	ENSG00000230449	30696806	30697535	-	ribosomal protein L7 pseudogene 4 [Source:HGNC Symbol;Acc:HGNC:21634]	RPL7P4
MUC21-1	chr6	30974961	30983897	ENSG00000233529	30945979	30954862	-	HLA complex group 21 [Source:HGNC Symbol;Acc:HGNC:31335]	HCG21
MUC21-1	chr6	30974961	30983897	ENSG00000237775	30866982	30875918	-	DDR1 divergent transcript [Source:HGNC Symbol;Acc:HGNC:28694]	DDR1-DT
MUC21-1	chr6	30974961	30983897	ENSG00000237923	30839526	30848159	-	long intergenic non-protein coding RNA 2570 [Source:HGNC Symbol;Acc:HGNC:39766]	LINC02570
MUC21-1	chr6	30974961	30983897	ENSG00000238211	31140727	31140913	+	RNA polymerase II subunit L pseudogene 1 [Source:HGNC Symbol;Acc:HGNC:31340]	POLR2LP1
MUC21-1	chr6	30974961	30983897	ENSG00000252761	30932618	30932709	-		AL669830.1
MUC21-1	chr6	30974961	30983897	ENSG00000255726	31222913	31223093	+	mitochondrial coiled-coil domain 1 (MCCD1) pseudogene	AL662844.1
MUC21-1	chr6	30974961	30983897	ENSG00000255899	31224342	31225058	-	HLA-B associated transcript 1 (BAT1) pseudogene	AL662844.2
MUC21-1	chr6	30974961	30983897	ENSG00000261272	31010474	31035402	+	mucin 22 [Source:HGNC Symbol;Acc:HGNC:39755]	MUC22
MUC21-1	chr6	30974961	30983897	ENSG00000263608	30751038	30751289	+	RNA, 7SL, cytoplasmic 353, pseudogene [Source:HGNC Symbol;Acc:HGNC:46369]	RN7SL353P
MUC21-1	chr6	30974961	30983897	ENSG00000271821	31200165	31201918	-	novel transcript	AL662844.3
MUC21-1	chr6	30974961	30983897	ENSG00000272273	30742929	30743592	+	IER3 antisense RNA 1 [Source:HGNC Symbol;Acc:HGNC:53629]	IER3-AS1
MUC21-1	chr6	30974961	30983897	ENSG00000272501	31195200	31198037	-	novel transcript, antisense to HCG27	AL662844.4
MUC21-1	chr6	30974961	30983897	ENSG00000272540	30723105	30723877	-	novel transcript, antisense to TUBB	AL662797.1
MUC21-1	chr6	30974961	30983897	ENSG00000275906	30961403	30962396	-	N-ethylmaleimide-sensitive factor attachment protein, gamma pseudogene 2 [Source:HGNC Symbol;Acc:HGNC:45166]	NAPGP2
MUC21-1	chr6	30974961	30983897	ENSG00000284370	30890883	30890972	+	microRNA 4640 [Source:HGNC Symbol;Acc:HGNC:41561]	MIR4640
NACC1-1	chr19	13139617	13141147	ENSG00000008441	12995608	13098796	+
NACC1-1	chr19	13139617	13141147	ENSG00000104903	13099033	13103161	-
NACC1-1	chr19	13139617	13141147	ENSG00000104907	13104902	13117567	-	tRNA methyltransferase 1 [Source:HGNC Symbol;Acc:HGNC:25980]	TRMT1
NACC1-1	chr19	13139617	13141147	ENSG00000104915	13144058	13150383	-
NACC1-1	chr19	13139617	13141147	ENSG00000105607	12891026	12914207	+
NACC1-1	chr19	13139617	13141147	ENSG00000105610	12884423	12887181	-
NACC1-1	chr19	13139617	13141147	ENSG00000105612	12875211	12881468	-
NACC1-1	chr19	13139617	13141147	ENSG00000160877	13118103	13141141	+
NACC1-1	chr19	13139617	13141147	ENSG00000160888	13150415	13154908	+
NACC1-1	chr19	13139617	13141147	ENSG00000161860	12898786	12919276	-
NACC1-1	chr19	13139617	13141147	ENSG00000179115	12922479	12934037	-
NACC1-1	chr19	13139617	13141147	ENSG00000179218	12938578	12944489	+
NACC1-1	chr19	13139617	13141147	ENSG00000179262	12945855	12953642	+
NACC1-1	chr19	13139617	13141147	ENSG00000179271	12953119	12957236	-
NACC1-1	chr19	13139617	13141147	ENSG00000179284	12965159	12974762	+	DAN domain BMP antagonist family member 5 [Source:HGNC Symbol;Acc:HGNC:26780]	DAND5
NACC1-1	chr19	13139617	13141147	ENSG00000213253	13157959	13158788	-	ribosomal protein L12 pseudogene 42 [Source:HGNC Symbol;Acc:HGNC:36165]	RPL12P42
NACC1-1	chr19	13139617	13141147	ENSG00000240616	12894133	12894880	+	ribosomal protein S6 pseudogene 25 [Source:HGNC Symbol;Acc:HGNC:35948]	RPS6P25
NACC1-1	chr19	13139617	13141147	ENSG00000266721	12920320	12920404	+	microRNA 5695 [Source:HGNC Symbol;Acc:HGNC:43548]	MIR5695
NACC1-1	chr19	13139617	13141147	ENSG00000266897	13131571	13132410	+	novel transcript	AC005546.1
NACC1-1	chr19	13139617	13141147	ENSG00000266975	12930522	12933296	+	FARSA antisense RNA 1 [Source:HGNC Symbol;Acc:HGNC:50479]	FARSA-AS1
NACC1-1	chr19	13139617	13141147	ENSG00000267417	13013662	13014511	-	novel transcript, antisense to NFIX	AC138474.1
NACC1-1	chr19	13139617	13141147	ENSG00000267458	12944118	12944487	-	novel transcript, antisense to CALR	AC092069.1
NACC1-1	chr19	13139617	13141147	ENSG00000267512	13139617	13141147	-	novel transcript, antisense to NACC1	AC011446.1
NACC1-1	chr19	13139617	13141147	ENSG00000267598	13153071	13154193	-	novel transcript, antisense to IER2	AC011446.2
NACC1-1	chr19	13139617	13141147	ENSG00000267610	13069792	13071374	-	novel transcript, antisense to NFIX	AC007787.1
NACC1-1	chr19	13139617	13141147	ENSG00000267735	12880969	12884088	+	novel transcript, antisense to DNASE2	AC020934.2
NACC1-1	chr19	13139617	13141147	ENSG00000274417	12940484	12940540	+	microRNA 6515 [Source:HGNC Symbol;Acc:HGNC:50227]	MIR6515
NACC1-1	chr19	13139617	13141147	ENSG00000276181	12852260	12852327	+	microRNA 6794 [Source:HGNC Symbol;Acc:HGNC:50117]	MIR6794
NACC1-1	chr19	13139617	13141147	ENSG00000279044	13081966	13082564	+	TEC	AC007787.2
NACC2-1	chr9	136008236	136009698	ENSG00000107187	136196250	136205109	-
NACC2-1	chr9	136008236	136009698	ENSG00000130559	135808487	135907228	-
NACC2-1	chr9	136008236	136009698	ENSG00000130560	135932969	135961380	-
NACC2-1	chr9	136008236	136009698	ENSG00000148411	136006537	136095285	-
NACC2-1	chr9	136008236	136009698	ENSG00000165661	136206333	136245841	-
NACC2-1	chr9	136008236	136009698	ENSG00000238058	135907812	135913513	+
NACC2-1	chr9	136008236	136009698	ENSG00000238227	136114581	136118863	-
NACC2-1	chr9	136008236	136009698	ENSG00000260193	136107808	136109424	-	long intergenic non-protein coding RNA 2846 [Source:HGNC Symbol;Acc:HGNC:54381]	LINC02846
NACC2-1	chr9	136008236	136009698	ENSG00000260220	136249971	136306901	-
NACC2-1	chr9	136008236	136009698	ENSG00000275329	136122521	136124363	+	novel transcript	AL138781.1
NACC2-1	chr9	136008236	136009698	ENSG00000279813	136249978	136251205	+	TEC	CR392000.1
NACC2-1	chr9	136008236	136009698	ENSG00000283769	136263925	136267237	+	novel transcript, antisense to a novel protein	CR392000.2
PAQR7-1	chr1	25859613	25863420	ENSG00000117632	25884181	25906991	-
PAQR7-1	chr1	25859613	25863420	ENSG00000117640	25818640	25832942	+
PAQR7-1	chr1	25859613	25863420	ENSG00000117643	25617468	25786207	+	mannosidase alpha class 1C member 1 [Source:HGNC Symbol;Acc:HGNC:19080]	MAN1C1
PAQR7-1	chr1	25859613	25863420	ENSG00000127423	25831913	25859458	-
PAQR7-1	chr1	25859613	25863420	ENSG00000158006	25959767	25998157	-
PAQR7-1	chr1	25859613	25863420	ENSG00000158008	26019884	26036464	+
PAQR7-1	chr1	25859613	25863420	ENSG00000158014	26037252	26046133	-
PAQR7-1	chr1	25859613	25863420	ENSG00000158022	26051304	26068436	-
PAQR7-1	chr1	25859613	25863420	ENSG00000162430	25800176	25818224	+
PAQR7-1	chr1	25859613	25863420	ENSG00000175087	26111165	26125543	+
PAQR7-1	chr1	25859613	25863420	ENSG00000182749	25861210	25871253	-
PAQR7-1	chr1	25859613	25863420	ENSG00000207237	25964197	25964300	+	RNA, U6 small nuclear 110, pseudogene [Source:HGNC Symbol;Acc:HGNC:47073]	RNU6-110P
PAQR7-1	chr1	25859613	25863420	ENSG00000207302	25877496	25877605	+		AL033528.1
PAQR7-1	chr1	25859613	25863420	ENSG00000223624	25888970	25889109	+	ribosomal protein L39 (RPL39) pseudogene	AL033528.2
PAQR7-1	chr1	25859613	25863420	ENSG00000225643	25581478	25590356	+	novel transcript	AL606491.1
PAQR7-1	chr1	25859613	25863420	ENSG00000228172	25816749	25820797	-	novel transcript	AL020996.1
PAQR7-1	chr1	25859613	25863420	ENSG00000229786	25887360	25887610	+	small nuclear ribonucleoprotein polypeptide F pseudogene 2 [Source:HGNC Symbol;Acc:HGNC:39665]	SNRPFP2
PAQR7-1	chr1	25859613	25863420	ENSG00000233478	25644544	25659111	-	novel transcript	AL031280.1
PAQR7-1	chr1	25859613	25863420	ENSG00000236528	25859613	25863420	+	novel transcript	AL033528.3
PAQR7-1	chr1	25859613	25863420	ENSG00000252190	26006006	26006130	+		AL592064.1
PAQR7-1	chr1	25859613	25863420	ENSG00000252691	26006216	26006299	+		AL592064.2
PAQR7-1	chr1	25859613	25863420	ENSG00000255054	25811470	25823744	+	novel protein	AL020996.2
PAQR7-1	chr1	25859613	25863420	ENSG00000272478	25831913	25832134	-	novel transcript, antisense to MTFR1L	AL020996.3
PAQR7-1	chr1	25859613	25863420	ENSG00000283938	25906362	25906454	-	microRNA 3917 [Source:HGNC Symbol;Acc:HGNC:38911]	MIR3917
PAQR7-1	chr1	25859613	25863420	ENSG00000284309	26046665	26049099	+	novel transcript	AL391650.2
PARP2-1	chr14	20343048	20343685	ENSG00000092094	20446411	20455105	-
PARP2-1	chr14	20343048	20343685	ENSG00000100814	20311368	20333312	-
PARP2-1	chr14	20343048	20343685	ENSG00000100823	20455191	20457772	+
PARP2-1	chr14	20343048	20343685	ENSG00000129484	20343582	20357905	+	poly(ADP-ribose) polymerase 2 [Source:HGNC Symbol;Acc:HGNC:272]	PARP2
PARP2-1	chr14	20343048	20343685	ENSG00000129566	20365667	20413429	-
PARP2-1	chr14	20343048	20343685	ENSG00000136319	20256558	20305994	-
PARP2-1	chr14	20343048	20343685	ENSG00000165782	20457719	20461612	-
PARP2-1	chr14	20343048	20343685	ENSG00000173464	20583559	20609884	-	ribonuclease A family member 11 (inactive) [Source:HGNC Symbol;Acc:HGNC:19269]	RNASE11
PARP2-1	chr14	20343048	20343685	ENSG00000176198	20239286	20244349	+	olfactory receptor family 11 subfamily H member 4 [Source:HGNC Symbol;Acc:HGNC:15347]	OR11H4
PARP2-1	chr14	20343048	20343685	ENSG00000176219	20223710	20224702	+	olfactory receptor family 11 subfamily H member 6 [Source:HGNC Symbol;Acc:HGNC:15349]	OR11H6
PARP2-1	chr14	20343048	20343685	ENSG00000176230	20110739	20122199	+
PARP2-1	chr14	20343048	20343685	ENSG00000176246	20060045	20060983	+	olfactory receptor family 4 subfamily L member 1 (gene/pseudogene) [Source:HGNC Symbol;Acc:HGNC:15356]	OR4L1
PARP2-1	chr14	20343048	20343685	ENSG00000181803	20640696	20641691	-	olfactory receptor family 6 subfamily S member 1 [Source:HGNC Symbol;Acc:HGNC:15363]	OR6S1
PARP2-1	chr14	20343048	20343685	ENSG00000182545	20505537	20511169	+	ribonuclease A family member 10 (inactive) [Source:HGNC Symbol;Acc:HGNC:19275]	RNASE10
PARP2-1	chr14	20343048	20343685	ENSG00000184394	20138820	20145471	+	olfactory receptor family 4 subfamily N member 5 [Source:HGNC Symbol;Acc:HGNC:15358]	OR4N5
PARP2-1	chr14	20343048	20343685	ENSG00000185271	20425870	20435811	-
PARP2-1	chr14	20343048	20343685	ENSG00000188655	20556093	20560931	-	ribonuclease A family member 9 (inactive) [Source:HGNC Symbol;Acc:HGNC:20673]	RNASE9
PARP2-1	chr14	20343048	20343685	ENSG00000196832	20190894	20201075	+	olfactory receptor family 11 subfamily G member 2 [Source:HGNC Symbol;Acc:HGNC:15346]	OR11G2
PARP2-1	chr14	20343048	20343685	ENSG00000198805	20468954	20477094	+
PARP2-1	chr14	20343048	20343685	ENSG00000200225	20414987	20415098	+	RNA, 5S ribosomal pseudogene 382 [Source:HGNC Symbol;Acc:HGNC:43282]	RNA5SP382
PARP2-1	chr14	20343048	20343685	ENSG00000222489	20323179	20323326	-	small nucleolar RNA, H/ACA box 79B [Source:HGNC Symbol;Acc:HGNC:52222]	SNORA79B
PARP2-1	chr14	20343048	20343685	ENSG00000238344	20326450	20326526	-	small nucleolar RNA, C/D box 126 [Source:HGNC Symbol;Acc:HGNC:33565]	SNORD126
PARP2-1	chr14	20343048	20343685	ENSG00000239327	20616644	20616991	-	ribosomal protein S26 (RPS26) pseudogene	AL163195.1
PARP2-1	chr14	20343048	20343685	ENSG00000252999	20090130	20090227	+	RNA, 5S ribosomal pseudogene 380 [Source:HGNC Symbol;Acc:HGNC:43280]	RNA5SP380
PARP2-1	chr14	20343048	20343685	ENSG00000254846	20344233	20346888	-	novel transcript	AL355075.1
PARP2-1	chr14	20343048	20343685	ENSG00000258436	20590193	20590823	-	ribonuclease A family member 12 (inactive) [Source:HGNC Symbol;Acc:HGNC:24211]	RNASE12
PARP2-1	chr14	20343048	20343685	ENSG00000258456	20524287	20525422	-	pentatricopeptide repeat domain 2 pseudogene 1 [Source:HGNC Symbol;Acc:HGNC:31718]	PTCD2P1
PARP2-1	chr14	20343048	20343685	ENSG00000258459	20305730	20306811	+	novel transcript, antisense to CCNB1IP1	AL356019.1
PARP2-1	chr14	20343048	20343685	ENSG00000258468	20179189	20180156	+	olfactory receptor family 11 subfamily G member 1 pseudogene [Source:HGNC Symbol;Acc:HGNC:15345]	OR11G1P
PARP2-1	chr14	20343048	20343685	ENSG00000258515	20451305	20451918	+	novel transcript, antisense to OSGEP	AL355075.2
PARP2-1	chr14	20343048	20343685	ENSG00000258573	20587644	20607137	+
PARP2-1	chr14	20343048	20343685	ENSG00000258625	20204606	20210498	+	olfactory receptor family 11 subfamily H member 5 pseudogene [Source:HGNC Symbol;Acc:HGNC:15348]	OR11H5P
PARP2-1	chr14	20343048	20343685	ENSG00000258641	20093353	20094263	+	olfactory receptor family 4 subfamily T member 1 pseudogene [Source:HGNC Symbol;Acc:HGNC:15360]	OR4T1P
PARP2-1	chr14	20343048	20343685	ENSG00000258768	20260480	20264308	-	novel transcript	AL356019.2
PARP2-1	chr14	20343048	20343685	ENSG00000258806	20229402	20230346	+	olfactory receptor family 11 subfamily H member 7 (gene/pseudogene) [Source:HGNC Symbol;Acc:HGNC:15350]	OR11H7
PARP2-1	chr14	20343048	20343685	ENSG00000258863	20528115	20528959	-	SET pseudogene 1 [Source:HGNC Symbol;Acc:HGNC:19279]	SETP1
PARP2-1	chr14	20343048	20343685	ENSG00000258899	20043916	20044827	+	olfactory receptor family 4 subfamily U member 1 pseudogene [Source:HGNC Symbol;Acc:HGNC:15361]	OR4U1P
PARP2-1	chr14	20343048	20343685	ENSG00000258908	20474789	20477089	-	novel transcript	AL355075.3
PARP2-1	chr14	20343048	20343685	ENSG00000259001	20343048	20343685	-	ribonuclease P RNA component H1	AL355075.4
PARP2-1	chr14	20343048	20343685	ENSG00000259060	20582892	20609795	-	novel protein	AL163195.3
PARP2-1	chr14	20343048	20343685	ENSG00000259074	20149232	20149745	+	PSMB7 pseudogene 1 [Source:HGNC Symbol;Acc:HGNC:49192]	PSMB7P1
PARP2-1	chr14	20343048	20343685	ENSG00000259095	20173632	20173813	-	general transcription factor IIi pseudogene 22 [Source:HGNC Symbol;Acc:HGNC:51734]	GTF2IP22
PARP2-1	chr14	20343048	20343685	ENSG00000259162	20437982	20441268	+	solute carrier family 12 (sodium/chloride transporters), member 3 (SLC12A3) pseudogene	AL355075.5
PARP2-1	chr14	20343048	20343685	ENSG00000277209	20343075	20343407	-	ribonuclease P RNA component H1 [Source:HGNC Symbol;Acc:HGNC:19273]	RPPH1
PARP2-1	chr14	20343048	20343685	ENSG00000284742	20183925	20184298	-	olfactory receptor family 11 subfamily P member 1 pseudogene [Source:HGNC Symbol;Acc:HGNC:19636]	OR11P1P
PHKA2-1	chrX	18890296	18894335	ENSG00000044446	18892300	18984598	-
PHKA2-1	chrX	18890296	18894335	ENSG00000086717	18675909	18827921	+	protein phosphatase with EF-hand domain 1 [Source:HGNC Symbol;Acc:HGNC:9243]	PPEF1
PHKA2-1	chrX	18890296	18894335	ENSG00000102104	18639910	18672109	-
PHKA2-1	chrX	18890296	18894335	ENSG00000173698	18989309	19122637	-
PHKA2-1	chrX	18890296	18894335	ENSG00000196564	18838709	18839452	-	pallidin homolog (mouse) (PLDN) pseudogene	AL096700.1
PHKA2-1	chrX	18890296	18894335	ENSG00000224224	18865771	18866554	+	HAUS augmin like complex subunit 1 pseudogene 2 [Source:HGNC Symbol;Acc:HGNC:43761]	HAUS1P2
PHKA2-1	chrX	18890296	18894335	ENSG00000237221	18688643	18691604	-	PPEF1 antisense RNA 1 [Source:HGNC Symbol;Acc:HGNC:40463]	PPEF1-AS1
PHKA2-1	chrX	18890296	18894335	ENSG00000237836	18890296	18894497	+
PHKA2-1	chrX	18890296	18894335	ENSG00000266710	18915243	18915535	-	RNA, 7SL, cytoplasmic 48, pseudogene [Source:HGNC Symbol;Acc:HGNC:46064]	RN7SL48P
PHKA2-1	chrX	18892744	18894497	ENSG00000044446	18892300	18984598	-
PHKA2-1	chrX	18892744	18894497	ENSG00000086717	18675909	18827921	+	protein phosphatase with EF-hand domain 1 [Source:HGNC Symbol;Acc:HGNC:9243]	PPEF1
PHKA2-1	chrX	18892744	18894497	ENSG00000102104	18639910	18672109	-
PHKA2-1	chrX	18892744	18894497	ENSG00000173698	18989309	19122637	-
PHKA2-1	chrX	18892744	18894497	ENSG00000196564	18838709	18839452	-	pallidin homolog (mouse) (PLDN) pseudogene	AL096700.1
PHKA2-1	chrX	18892744	18894497	ENSG00000224224	18865771	18866554	+	HAUS augmin like complex subunit 1 pseudogene 2 [Source:HGNC Symbol;Acc:HGNC:43761]	HAUS1P2
PHKA2-1	chrX	18892744	18894497	ENSG00000237221	18688643	18691604	-	PPEF1 antisense RNA 1 [Source:HGNC Symbol;Acc:HGNC:40463]	PPEF1-AS1
PHKA2-1	chrX	18892744	18894497	ENSG00000237836	18890296	18894497	+
PHKA2-1	chrX	18892744	18894497	ENSG00000266710	18915243	18915535	-	RNA, 7SL, cytoplasmic 48, pseudogene [Source:HGNC Symbol;Acc:HGNC:46064]	RN7SL48P
PHLDB2-1	chr3	111682032	111860844	ENSG00000114529	112086335	112131004	+
PHLDB2-1	chr3	111682032	111860844	ENSG00000144824	111732497	111976517	+
PHLDB2-1	chr3	111682032	111860844	ENSG00000144827	111979010	111993363	+
PHLDB2-1	chr3	111682032	111860844	ENSG00000144834	111998664	112013887	+
PHLDB2-1	chr3	111682032	111860844	ENSG00000174500	112120841	112133305	-
PHLDB2-1	chr3	111682032	111860844	ENSG00000176040	112034843	112081269	+	transmembrane serine protease 7 [Source:HGNC Symbol;Acc:HGNC:30846]	TMPRSS7
PHLDB2-1	chr3	111682032	111860844	ENSG00000177494	111592900	111595443	-
PHLDB2-1	chr3	111682032	111860844	ENSG00000207940	112112801	112112898	+	microRNA 567 [Source:HGNC Symbol;Acc:HGNC:32823]	MIR567
PHLDB2-1	chr3	111682032	111860844	ENSG00000239311	111466313	111497095	-	novel transcript	AC092916.1
PHLDB2-1	chr3	111682032	111860844	ENSG00000239439	112030931	112031649	-	riboflavin kinase pseudogene 2 [Source:HGNC Symbol;Acc:HGNC:39182]	RFKP2
PHLDB2-1	chr3	111682032	111860844	ENSG00000240766	111676736	111677433	-	PLCXD2 antisense RNA 1 [Source:HGNC Symbol;Acc:HGNC:41145]	PLCXD2-AS1
PHLDB2-1	chr3	111682032	111860844	ENSG00000240787	111570638	111571054	-	pseudogene similar to part of poliovirus receptor-related 2 (herpesvirus entry mediator) BPVRL2	AC092916.2
PHLDB2-1	chr3	111682032	111860844	ENSG00000240891	111674676	111846447	+
PHLDB2-1	chr3	111682032	111860844	ENSG00000244142	111478737	111478943	+	ATPase H+ transporting V0 subunit c pseudogene 2 [Source:HGNC Symbol;Acc:HGNC:40000]	ATP6V0CP2
PHLDB2-1	chr3	111682032	111860844	ENSG00000244720	111633672	111635089	+	NT5C3A pseudogene 2 [Source:HGNC Symbol;Acc:HGNC:54578]	NT5C3AP2
PHLDB2-1	chr3	111682032	111860844	ENSG00000261488	112133423	112135359	+	TGF-beta induced lncRNA [Source:HGNC Symbol;Acc:HGNC:53943]	TBILA
PHLDB2-1	chr3	111788727	111860844	ENSG00000114529	112086335	112131004	+
PHLDB2-1	chr3	111788727	111860844	ENSG00000144824	111732497	111976517	+
PHLDB2-1	chr3	111788727	111860844	ENSG00000144827	111979010	111993363	+
PHLDB2-1	chr3	111788727	111860844	ENSG00000144834	111998664	112013887	+
PHLDB2-1	chr3	111788727	111860844	ENSG00000174500	112120841	112133305	-
PHLDB2-1	chr3	111788727	111860844	ENSG00000176040	112034843	112081269	+	transmembrane serine protease 7 [Source:HGNC Symbol;Acc:HGNC:30846]	TMPRSS7
PHLDB2-1	chr3	111788727	111860844	ENSG00000177494	111592900	111595443	-
PHLDB2-1	chr3	111788727	111860844	ENSG00000207940	112112801	112112898	+	microRNA 567 [Source:HGNC Symbol;Acc:HGNC:32823]	MIR567
PHLDB2-1	chr3	111788727	111860844	ENSG00000239439	112030931	112031649	-	riboflavin kinase pseudogene 2 [Source:HGNC Symbol;Acc:HGNC:39182]	RFKP2
PHLDB2-1	chr3	111788727	111860844	ENSG00000240766	111676736	111677433	-	PLCXD2 antisense RNA 1 [Source:HGNC Symbol;Acc:HGNC:41145]	PLCXD2-AS1
PHLDB2-1	chr3	111788727	111860844	ENSG00000240787	111570638	111571054	-	pseudogene similar to part of poliovirus receptor-related 2 (herpesvirus entry mediator) BPVRL2	AC092916.2
PHLDB2-1	chr3	111788727	111860844	ENSG00000240891	111674676	111846447	+
PHLDB2-1	chr3	111788727	111860844	ENSG00000244720	111633672	111635089	+	NT5C3A pseudogene 2 [Source:HGNC Symbol;Acc:HGNC:54578]	NT5C3AP2
PHLDB2-1	chr3	111788727	111860844	ENSG00000261488	112133423	112135359	+	TGF-beta induced lncRNA [Source:HGNC Symbol;Acc:HGNC:53943]	TBILA
PHLDB2-1	chr3	111798635	111860844	ENSG00000114529	112086335	112131004	+
PHLDB2-1	chr3	111798635	111860844	ENSG00000144824	111732497	111976517	+
PHLDB2-1	chr3	111798635	111860844	ENSG00000144827	111979010	111993363	+
PHLDB2-1	chr3	111798635	111860844	ENSG00000144834	111998664	112013887	+
PHLDB2-1	chr3	111798635	111860844	ENSG00000174500	112120841	112133305	-
PHLDB2-1	chr3	111798635	111860844	ENSG00000176040	112034843	112081269	+	transmembrane serine protease 7 [Source:HGNC Symbol;Acc:HGNC:30846]	TMPRSS7
PHLDB2-1	chr3	111798635	111860844	ENSG00000177494	111592900	111595443	-
PHLDB2-1	chr3	111798635	111860844	ENSG00000207940	112112801	112112898	+	microRNA 567 [Source:HGNC Symbol;Acc:HGNC:32823]	MIR567
PHLDB2-1	chr3	111798635	111860844	ENSG00000239439	112030931	112031649	-	riboflavin kinase pseudogene 2 [Source:HGNC Symbol;Acc:HGNC:39182]	RFKP2
PHLDB2-1	chr3	111798635	111860844	ENSG00000240766	111676736	111677433	-	PLCXD2 antisense RNA 1 [Source:HGNC Symbol;Acc:HGNC:41145]	PLCXD2-AS1
PHLDB2-1	chr3	111798635	111860844	ENSG00000240787	111570638	111571054	-	pseudogene similar to part of poliovirus receptor-related 2 (herpesvirus entry mediator) BPVRL2	AC092916.2
PHLDB2-1	chr3	111798635	111860844	ENSG00000240891	111674676	111846447	+
PHLDB2-1	chr3	111798635	111860844	ENSG00000244720	111633672	111635089	+	NT5C3A pseudogene 2 [Source:HGNC Symbol;Acc:HGNC:54578]	NT5C3AP2
PHLDB2-1	chr3	111798635	111860844	ENSG00000261488	112133423	112135359	+	TGF-beta induced lncRNA [Source:HGNC Symbol;Acc:HGNC:53943]	TBILA
PHRF1-1	chr11	606489	607524	ENSG00000023191	494512	507300	-
PHRF1-1	chr11	606489	607524	ENSG00000069696	637293	640706	+
PHRF1-1	chr11	606489	607524	ENSG00000070031	626431	627143	-
PHRF1-1	chr11	606489	607524	ENSG00000070047	576486	612222	+
PHRF1-1	chr11	606489	607524	ENSG00000099834	616565	626078	-
PHRF1-1	chr11	606489	607524	ENSG00000099849	560404	564021	+
PHRF1-1	chr11	606489	607524	ENSG00000142089	319669	327537	-
PHRF1-1	chr11	606489	607524	ENSG00000161328	537527	554916	+
PHRF1-1	chr11	606489	607524	ENSG00000174775	532242	537287	-
PHRF1-1	chr11	606489	607524	ENSG00000174915	448268	491399	+
PHRF1-1	chr11	606489	607524	ENSG00000177030	644233	706715	-
PHRF1-1	chr11	606489	607524	ENSG00000177042	695428	705028	+	transmembrane protein 80 [Source:HGNC Symbol;Acc:HGNC:27453]	TMEM80
PHRF1-1	chr11	606489	607524	ENSG00000177106	694438	727727	+
PHRF1-1	chr11	606489	607524	ENSG00000177156	747329	765024	+
PHRF1-1	chr11	606489	607524	ENSG00000177225	767220	777488	-
PHRF1-1	chr11	606489	607524	ENSG00000177542	790475	798333	-
PHRF1-1	chr11	606489	607524	ENSG00000177595	799179	809753	-
PHRF1-1	chr11	606489	607524	ENSG00000177600	809647	812880	+
PHRF1-1	chr11	606489	607524	ENSG00000177666	818902	825573	+
PHRF1-1	chr11	606489	607524	ENSG00000177685	826144	831991	+
PHRF1-1	chr11	606489	607524	ENSG00000177697	832843	839831	+
PHRF1-1	chr11	606489	607524	ENSG00000177700	837356	842545	-
PHRF1-1	chr11	606489	607524	ENSG00000182272	369796	382116	+
PHRF1-1	chr11	606489	607524	ENSG00000184363	392614	404908	+
PHRF1-1	chr11	606489	607524	ENSG00000184524	787104	790123	-
PHRF1-1	chr11	606489	607524	ENSG00000185101	417933	442011	-
PHRF1-1	chr11	606489	607524	ENSG00000185187	405716	417455	-
PHRF1-1	chr11	606489	607524	ENSG00000185201	307631	315272	+	interferon induced transmembrane protein 2 [Source:HGNC Symbol;Acc:HGNC:5413]	IFITM2
PHRF1-1	chr11	606489	607524	ENSG00000185507	612553	615999	-
PHRF1-1	chr11	606489	607524	ENSG00000185522	554855	560779	-
PHRF1-1	chr11	606489	607524	ENSG00000185885	313506	315272	+
PHRF1-1	chr11	606489	607524	ENSG00000199038	568089	568198	-	microRNA 210 [Source:HGNC Symbol;Acc:HGNC:31587]	MIR210
PHRF1-1	chr11	606489	607524	ENSG00000199785	811681	811814	+	small nucleolar RNA, H/ACA box 52 [Source:HGNC Symbol;Acc:HGNC:32645]	SNORA52
PHRF1-1	chr11	606489	607524	ENSG00000214063	842808	867116	+
PHRF1-1	chr11	606489	607524	ENSG00000243562	440399	440693	-	RNA, 7SL, cytoplasmic 838, pseudogene [Source:HGNC Symbol;Acc:HGNC:46854]	RN7SL838P
PHRF1-1	chr11	606489	607524	ENSG00000247095	565660	568457	-
PHRF1-1	chr11	606489	607524	ENSG00000250397	856880	859795	-	novel transcript	AP006623.1
PHRF1-1	chr11	606489	607524	ENSG00000251661	318640	325631	+	novel transcript, antisense to IFITM3	AC136475.1
PHRF1-1	chr11	606489	607524	ENSG00000254739	528907	529659	+	novel transcript	AC137894.1
PHRF1-1	chr11	606489	607524	ENSG00000254815	557595	560107	+
PHRF1-1	chr11	606489	607524	ENSG00000254910	310139	311141	-	novel transcript	AC136475.2
PHRF1-1	chr11	606489	607524	ENSG00000255089	321991	322426	+	novel transcript, antisense to IFITM3	AC136475.4
PHRF1-1	chr11	606489	607524	ENSG00000255108	823634	832883	-	novel transcript	AP006621.1
PHRF1-1	chr11	606489	607524	ENSG00000255142	781645	782105	+	novel transcript	AP006621.2
PHRF1-1	chr11	606489	607524	ENSG00000255158	665910	678391	+	novel transcript	AC131934.1
PHRF1-1	chr11	606489	607524	ENSG00000255237	462930	463899	-	novel transcript	AC138230.1
PHRF1-1	chr11	606489	607524	ENSG00000255284	777578	784297	+
PHRF1-1	chr11	606489	607524	ENSG00000255328	327171	330122	+	novel transcript	AC136475.5
PHRF1-1	chr11	606489	607524	ENSG00000269915	708564	727047	-	novel transcript, antisense to EPS8L2	AP006621.4
PHRF1-1	chr11	606489	607524	ENSG00000270030	325703	326294	-	novel transcript	AC136475.7
PHRF1-1	chr11	606489	607524	ENSG00000270105	322186	322727	-	novel transcript	AC136475.8
PHRF1-1	chr11	606489	607524	ENSG00000270972	333192	333688	+	novel transcript	AC136475.9
PHRF1-1	chr11	606489	607524	ENSG00000274897	797511	799190	+
PHRF1-1	chr11	606489	607524	ENSG00000279672	779617	780755	+	TEC	AP006621.5
PMF1-1	chr1	156212775	156213244	ENSG00000116584	155946851	156007070	-
PMF1-1	chr1	156212775	156213244	ENSG00000116586	156054752	156058510	+
PMF1-1	chr1	156212775	156213244	ENSG00000116604	156463727	156500828	-
PMF1-1	chr1	156212775	156213244	ENSG00000125462	156404250	156430701	-
PMF1-1	chr1	156212775	156213244	ENSG00000132677	156369212	156385219	+
PMF1-1	chr1	156212775	156213244	ENSG00000132680	155913043	155934400	-
PMF1-1	chr1	156212775	156213244	ENSG00000132698	156061160	156070514	+
PMF1-1	chr1	156212775	156213244	ENSG00000160781	156243321	156248117	-
PMF1-1	chr1	156212775	156213244	ENSG00000160783	156212993	156240042	+	polyamine modulated factor 1 [Source:HGNC Symbol;Acc:HGNC:9112]	PMF1
PMF1-1	chr1	156212775	156213244	ENSG00000160785	156193932	156212796	+	solute carrier family 25 member 44 [Source:HGNC Symbol;Acc:HGNC:29036]	SLC25A44
PMF1-1	chr1	156212775	156213244	ENSG00000160789	156082573	156140089	+
PMF1-1	chr1	156212775	156213244	ENSG00000160803	156035301	156053794	-
PMF1-1	chr1	156212775	156213244	ENSG00000163467	156337314	156346995	+
PMF1-1	chr1	156212775	156213244	ENSG00000163468	156308968	156367873	-
PMF1-1	chr1	156212775	156213244	ENSG00000163472	156282935	156293185	+
PMF1-1	chr1	156212775	156213244	ENSG00000163479	156009048	156020959	-
PMF1-1	chr1	156212775	156213244	ENSG00000173080	155941710	155942949	+
PMF1-1	chr1	156212775	156213244	ENSG00000189030	156298624	156299299	-
PMF1-1	chr1	156212775	156213244	ENSG00000196189	156147366	156177752	+
PMF1-1	chr1	156212775	156213244	ENSG00000198715	156290089	156295689	-
PMF1-1	chr1	156212775	156213244	ENSG00000198952	156249224	156282825	-	SMG5 nonsense mediated mRNA decay factor [Source:HGNC Symbol;Acc:HGNC:24644]	SMG5
PMF1-1	chr1	156212775	156213244	ENSG00000206651	156484098	156484210	-	Y RNA [Source:RFAM;Acc:RF00019]	Y_RNA
PMF1-1	chr1	156212775	156213244	ENSG00000207475	155919909	155920045	-	small nucleolar RNA, H/ACA box 80E [Source:HGNC Symbol;Acc:HGNC:32635]	SNORA80E
PMF1-1	chr1	156212775	156213244	ENSG00000207933	156420341	156420429	-	microRNA 9-1 [Source:HGNC Symbol;Acc:HGNC:31641]	MIR9-1
PMF1-1	chr1	156212775	156213244	ENSG00000224276	155991390	156001787	+	ARHGEF2 antisense RNA 1 [Source:HGNC Symbol;Acc:HGNC:40082]	ARHGEF2-AS1
PMF1-1	chr1	156212775	156213244	ENSG00000236947	156446412	156456577	-
PMF1-1	chr1	156212775	156213244	ENSG00000237390	156388226	156395609	+	novel transcript	AL139130.1
PMF1-1	chr1	156212775	156213244	ENSG00000242252	156241962	156243321	+
PMF1-1	chr1	156212775	156213244	ENSG00000252236	156192063	156192203	-		AL135927.1
PMF1-1	chr1	156212775	156213244	ENSG00000254726	156072013	156081998	-
PMF1-1	chr1	156212775	156213244	ENSG00000260238	156212982	156243332	+	PMF1-BGLAP readthrough [Source:HGNC Symbol;Acc:HGNC:42953]	PMF1-BGLAP
PMF1-1	chr1	156212775	156213244	ENSG00000260460	156509854	156511681	+	novel transcript	AL365181.1
PMF1-1	chr1	156212775	156213244	ENSG00000273002	155978799	155982986	+	uncharacterized LOC107985209 [Source:NCBI gene (formerly Entrezgene);Acc:107985209]	AL355388.1
PMF1-1	chr1	156212775	156213244	ENSG00000277817	155951273	155951336	-	microRNA 6738 [Source:HGNC Symbol;Acc:HGNC:49939]	MIR6738
PMF1-1	chr1	156212775	156213244	ENSG00000280466	155925958	155926085	-	small Cajal body-specific RNA 4 [Source:HGNC Symbol;Acc:HGNC:32560]	SCARNA4
PMF1-1	chr1	156212775	156213244	ENSG00000281394	155925958	155926086	-	small Cajal body-specific RNA 4 [Source:HGNC Symbol;Acc:HGNC:32560]	SCARNA4
POLR3A-1	chr10	77963847	77971008	ENSG00000138326	78033760	78056812	+
POLR3A-1	chr10	77963847	77971008	ENSG00000148606	77969251	78029545	-
POLR3A-1	chr10	77963847	77971008	ENSG00000151208	77790791	77926526	-
POLR3A-1	chr10	77963847	77971008	ENSG00000199664	77776951	77777055	-	RNA, U6 small nuclear 1266, pseudogene [Source:HGNC Symbol;Acc:HGNC:48229]	RNU6-1266P
POLR3A-1	chr10	77963847	77971008	ENSG00000204049	77866875	77869610	+	novel transcript, antisense to DLG5	AL391421.1
POLR3A-1	chr10	77963847	77971008	ENSG00000213513	77780337	77781876	-	inosine monophosphate dehydrogenase 1 pseudogene 5 [Source:HGNC Symbol;Acc:HGNC:33960]	IMPDH1P5
POLR3A-1	chr10	77963847	77971008	ENSG00000213514	77730766	77734769	+	novel zinc finger pseudogene (KIAA1629)	AL731556.1
POLR3A-1	chr10	77963847	77971008	ENSG00000228748	77782866	77793176	+	novel transcript	AL450306.1
POLR3A-1	chr10	77963847	77971008	ENSG00000231957	78068623	78069538	-	G protein subunit alpha i2 pseudogene 2 [Source:HGNC Symbol;Acc:HGNC:45110]	GNAI2P2
POLR3A-1	chr10	77963847	77971008	ENSG00000233871	77927372	77929824	+	DLG5 antisense RNA 1 [Source:HGNC Symbol;Acc:HGNC:45109]	DLG5-AS1
POLR3A-1	chr10	77963847	77971008	ENSG00000234612	77953495	77953876	+	H2A.Z histone pseudogene 5 [Source:HGNC Symbol;Acc:HGNC:38018]	H2AZP5
POLR3A-1	chr10	77963847	77971008	ENSG00000243446	77912271	77912545	-	RNA, 7SL, cytoplasmic 284, pseudogene [Source:HGNC Symbol;Acc:HGNC:46300]	RN7SL284P
POLR3A-1	chr10	77963847	77971008	ENSG00000274686	77966173	77966440	+	Metazoan signal recognition particle RNA [Source:RFAM;Acc:RF00017]	Metazoa_SRP
POLR3A-1	chr10	77963847	77971008	ENSG00000277981	77738246	77739015	+	retinoblastoma binding protein 6 (RBBP6) pseudogene	AL731556.2
POLR3A-1	chr10	77963847	77971008	ENSG00000283096	78176928	78178186	+	novel transcript	AL731555.1
PPFIA1-1	chr11	70324871	70327209	ENSG00000085733	70398404	70436584	+
PPFIA1-1	chr11	70324871	70327209	ENSG00000131620	70078302	70189528	+	anoctamin 1 [Source:HGNC Symbol;Acc:HGNC:21625]	ANO1
PPFIA1-1	chr11	70324871	70327209	ENSG00000131626	70270700	70384403	+
PPFIA1-1	chr11	70324871	70327209	ENSG00000168040	70203163	70207390	+
PPFIA1-1	chr11	70324871	70327209	ENSG00000202070	70075363	70075469	+	RNA, U6 small nuclear 1175, pseudogene [Source:HGNC Symbol;Acc:HGNC:48138]	RNU6-1175P
PPFIA1-1	chr11	70324871	70327209	ENSG00000221333	70283955	70284070	+	microRNA 548k [Source:HGNC Symbol;Acc:HGNC:35285]	MIR548K
PPFIA1-1	chr11	70324871	70327209	ENSG00000227726	70477277	70477592	-	novel transcript	AP001271.1
PPFIA1-1	chr11	70324871	70327209	ENSG00000246889	70372246	70398488	-	novel transcript	AP000487.1
PPFIA1-1	chr11	70324871	70327209	ENSG00000248844	70056230	70065371	-	long intergenic non-protein coding RNA 2753 [Source:HGNC Symbol;Acc:HGNC:54273]	LINC02753
PPFIA1-1	chr11	70324871	70327209	ENSG00000254417	70072434	70075433	-	long intergenic non-protein coding RNA 2584 [Source:HGNC Symbol;Acc:HGNC:33275]	LINC02584
PPFIA1-1	chr11	70324871	70327209	ENSG00000254484	70319928	70321415	+	novel transcript	AP002336.1
PPFIA1-1	chr11	70324871	70327209	ENSG00000254495	70358198	70358677	-	novel transcript	AP000487.2
PPFIA1-1	chr11	70324871	70327209	ENSG00000254604	70282367	70363368	-	novel transcript	AP002336.2
PPFIA1-1	chr11	70324871	70327209	ENSG00000254721	70206291	70207390	-	novel transcript	AP000879.1
PPFIA1-1	chr11	70324871	70327209	ENSG00000254902	70187788	70188509	-	ANO1 antisense RNA 1 [Source:HGNC Symbol;Acc:HGNC:40016]	ANO1-AS1
PPFIA1-1	chr11	70324871	70327209	ENSG00000255143	70129297	70149623	+	novel transcript, sense overlapping ANO1	AP000879.2
PPFIA1-1	chr11	70324871	70327209	ENSG00000255329	70278921	70279297	-	H2A.Z histone pseudogene 4 [Source:HGNC Symbol;Acc:HGNC:38015]	H2AZP4
PPFIA1-1	chr11	70324871	70327209	ENSG00000255539	70324871	70327209	-	novel transcript	AP002336.3
PPFIA1-1	chr11	70324871	70327209	ENSG00000279459	70603304	70604859	+	TEC	AP001271.2
PPP1R14B-1	chr11	64245866	64248217	ENSG00000002330	64269830	64284704	-
PPP1R14B-1	chr11	64245866	64248217	ENSG00000110011	64230278	64234286	+	DnaJ heat shock protein family (Hsp40) member C4 [Source:HGNC Symbol;Acc:HGNC:5271]	DNAJC4
PPP1R14B-1	chr11	64245866	64248217	ENSG00000126432	64318088	64321811	+
PPP1R14B-1	chr11	64245866	64248217	ENSG00000126500	64103188	64119173	+	fibronectin leucine rich transmembrane protein 1 [Source:HGNC Symbol;Acc:HGNC:3760]	FLRT1
PPP1R14B-1	chr11	64245866	64248217	ENSG00000133315	63998558	64166106	-
PPP1R14B-1	chr11	64245866	64248217	ENSG00000149743	64223799	64226254	-
PPP1R14B-1	chr11	64245866	64248217	ENSG00000149761	64225941	64230686	+
PPP1R14B-1	chr11	64245866	64248217	ENSG00000149781	64206678	64223886	+	fermitin family member 3 [Source:HGNC Symbol;Acc:HGNC:23151]	FERMT3
PPP1R14B-1	chr11	64245866	64248217	ENSG00000149782	64251523	64269150	+
PPP1R14B-1	chr11	64245866	64248217	ENSG00000162302	64359148	64372215	+
PPP1R14B-1	chr11	64245866	64248217	ENSG00000167770	63985853	64001811	+	OTU deubiquitinase, ubiquitin aldehyde binding 1 [Source:HGNC Symbol;Acc:HGNC:23077]	OTUB1
PPP1R14B-1	chr11	64245866	64248217	ENSG00000168071	64340223	64357534	+
PPP1R14B-1	chr11	64245866	64248217	ENSG00000168439	64185272	64204543	+
PPP1R14B-1	chr11	64245866	64248217	ENSG00000173113	64316460	64318084	-
PPP1R14B-1	chr11	64245866	64248217	ENSG00000173153	64305572	64316743	+
PPP1R14B-1	chr11	64245866	64248217	ENSG00000173264	64270062	64289500	+	G protein-coupled receptor 137 [Source:HGNC Symbol;Acc:HGNC:24300]	GPR137
PPP1R14B-1	chr11	64245866	64248217	ENSG00000173457	64244480	64246941	-
PPP1R14B-1	chr11	64245866	64248217	ENSG00000173486	64241003	64244132	+
PPP1R14B-1	chr11	64245866	64248217	ENSG00000173511	64234538	64238793	+	vascular endothelial growth factor B [Source:HGNC Symbol;Acc:HGNC:12681]	VEGFB
PPP1R14B-1	chr11	64245866	64248217	ENSG00000176340	63974607	63976543	+
PPP1R14B-1	chr11	64245866	64248217	ENSG00000181908	64449074	64451657	+	long intergenic non-protein coding RNA 2724 [Source:HGNC Symbol;Acc:HGNC:54241]	LINC02724
PPP1R14B-1	chr11	64245866	64248217	ENSG00000182450	64291302	64300031	+
PPP1R14B-1	chr11	64245866	64248217	ENSG00000207024	64296037	64296138	+		AP001453.1
PPP1R14B-1	chr11	64245866	64248217	ENSG00000207200	63970470	63970576	+	RNA, U6 small nuclear 45, pseudogene [Source:HGNC Symbol;Acc:HGNC:34289]	RNU6-45P
PPP1R14B-1	chr11	64245866	64248217	ENSG00000219435	64300391	64304770	+
PPP1R14B-1	chr11	64245866	64248217	ENSG00000221273	64368602	64368703	+	microRNA 1237 [Source:HGNC Symbol;Acc:HGNC:33927]	MIR1237
PPP1R14B-1	chr11	64245866	64248217	ENSG00000231492	64420391	64432670	+
PPP1R14B-1	chr11	64245866	64248217	ENSG00000231680	64394342	64395831	-	long intergenic non-protein coding RNA 2723 [Source:HGNC Symbol;Acc:HGNC:54240]	LINC02723
PPP1R14B-1	chr11	64245866	64248217	ENSG00000232500	64500853	64505386	+
PPP1R14B-1	chr11	64245866	64248217	ENSG00000236935	64325050	64329504	-	novel transcript	AP003774.2
PPP1R14B-1	chr11	64245866	64248217	ENSG00000237363	64531044	64532970	+	novel pseudogene	AP006288.1
PPP1R14B-1	chr11	64245866	64248217	ENSG00000256100	63974620	63988346	+	novel transcript	AP000721.1
PPP1R14B-1	chr11	64245866	64248217	ENSG00000256116	64229214	64234352	-	novel transcript	AP001453.2
PPP1R14B-1	chr11	64245866	64248217	ENSG00000256341	64118272	64119210	-	novel transcript	AP006333.1
PPP1R14B-1	chr11	64245866	64248217	ENSG00000256481	64081690	64087175	+	novel transcript, antisense to MACROD1	AP006333.2
PPP1R14B-1	chr11	64245866	64248217	ENSG00000256824	64035970	64103653	+	novel transcript, antisense to MACROD1	AP000721.2
PPP1R14B-1	chr11	64245866	64248217	ENSG00000256940	64245964	64248217	+
PPP1R14B-1	chr11	64245866	64248217	ENSG00000257069	64291722	64304769	+	KCNK4-TEX40 readthrough [Source:NCBI gene (formerly Entrezgene);Acc:106780802]	KCNK4-TEX40
PPP1R14B-1	chr11	64245866	64248217	ENSG00000257086	64246939	64249494	-	novel transcript	AP001453.3
PPP1R14B-1	chr11	64245866	64248217	ENSG00000278359	64341849	64341904	-	microRNA 7155 [Source:HGNC Symbol;Acc:HGNC:50005]	MIR7155
PPP1R14B-1	chr11	64245956	64248335	ENSG00000002330	64269830	64284704	-
PPP1R14B-1	chr11	64245956	64248335	ENSG00000110011	64230278	64234286	+	DnaJ heat shock protein family (Hsp40) member C4 [Source:HGNC Symbol;Acc:HGNC:5271]	DNAJC4
PPP1R14B-1	chr11	64245956	64248335	ENSG00000126432	64318088	64321811	+
PPP1R14B-1	chr11	64245956	64248335	ENSG00000126500	64103188	64119173	+	fibronectin leucine rich transmembrane protein 1 [Source:HGNC Symbol;Acc:HGNC:3760]	FLRT1
PPP1R14B-1	chr11	64245956	64248335	ENSG00000133315	63998558	64166106	-
PPP1R14B-1	chr11	64245956	64248335	ENSG00000149743	64223799	64226254	-
PPP1R14B-1	chr11	64245956	64248335	ENSG00000149761	64225941	64230686	+
PPP1R14B-1	chr11	64245956	64248335	ENSG00000149781	64206678	64223886	+	fermitin family member 3 [Source:HGNC Symbol;Acc:HGNC:23151]	FERMT3
PPP1R14B-1	chr11	64245956	64248335	ENSG00000149782	64251523	64269150	+
PPP1R14B-1	chr11	64245956	64248335	ENSG00000162302	64359148	64372215	+
PPP1R14B-1	chr11	64245956	64248335	ENSG00000167770	63985853	64001811	+	OTU deubiquitinase, ubiquitin aldehyde binding 1 [Source:HGNC Symbol;Acc:HGNC:23077]	OTUB1
PPP1R14B-1	chr11	64245956	64248335	ENSG00000168071	64340223	64357534	+
PPP1R14B-1	chr11	64245956	64248335	ENSG00000168439	64185272	64204543	+
PPP1R14B-1	chr11	64245956	64248335	ENSG00000173113	64316460	64318084	-
PPP1R14B-1	chr11	64245956	64248335	ENSG00000173153	64305572	64316743	+
PPP1R14B-1	chr11	64245956	64248335	ENSG00000173264	64270062	64289500	+	G protein-coupled receptor 137 [Source:HGNC Symbol;Acc:HGNC:24300]	GPR137
PPP1R14B-1	chr11	64245956	64248335	ENSG00000173457	64244480	64246941	-
PPP1R14B-1	chr11	64245956	64248335	ENSG00000173486	64241003	64244132	+
PPP1R14B-1	chr11	64245956	64248335	ENSG00000173511	64234538	64238793	+	vascular endothelial growth factor B [Source:HGNC Symbol;Acc:HGNC:12681]	VEGFB
PPP1R14B-1	chr11	64245956	64248335	ENSG00000176340	63974607	63976543	+
PPP1R14B-1	chr11	64245956	64248335	ENSG00000181908	64449074	64451657	+	long intergenic non-protein coding RNA 2724 [Source:HGNC Symbol;Acc:HGNC:54241]	LINC02724
PPP1R14B-1	chr11	64245956	64248335	ENSG00000182450	64291302	64300031	+
PPP1R14B-1	chr11	64245956	64248335	ENSG00000207024	64296037	64296138	+		AP001453.1
PPP1R14B-1	chr11	64245956	64248335	ENSG00000207200	63970470	63970576	+	RNA, U6 small nuclear 45, pseudogene [Source:HGNC Symbol;Acc:HGNC:34289]	RNU6-45P
PPP1R14B-1	chr11	64245956	64248335	ENSG00000219435	64300391	64304770	+
PPP1R14B-1	chr11	64245956	64248335	ENSG00000221273	64368602	64368703	+	microRNA 1237 [Source:HGNC Symbol;Acc:HGNC:33927]	MIR1237
PPP1R14B-1	chr11	64245956	64248335	ENSG00000231492	64420391	64432670	+
PPP1R14B-1	chr11	64245956	64248335	ENSG00000231680	64394342	64395831	-	long intergenic non-protein coding RNA 2723 [Source:HGNC Symbol;Acc:HGNC:54240]	LINC02723
PPP1R14B-1	chr11	64245956	64248335	ENSG00000232500	64500853	64505386	+
PPP1R14B-1	chr11	64245956	64248335	ENSG00000236935	64325050	64329504	-	novel transcript	AP003774.2
PPP1R14B-1	chr11	64245956	64248335	ENSG00000237363	64531044	64532970	+	novel pseudogene	AP006288.1
PPP1R14B-1	chr11	64245956	64248335	ENSG00000256100	63974620	63988346	+	novel transcript	AP000721.1
PPP1R14B-1	chr11	64245956	64248335	ENSG00000256116	64229214	64234352	-	novel transcript	AP001453.2
PPP1R14B-1	chr11	64245956	64248335	ENSG00000256341	64118272	64119210	-	novel transcript	AP006333.1
PPP1R14B-1	chr11	64245956	64248335	ENSG00000256481	64081690	64087175	+	novel transcript, antisense to MACROD1	AP006333.2
PPP1R14B-1	chr11	64245956	64248335	ENSG00000256824	64035970	64103653	+	novel transcript, antisense to MACROD1	AP000721.2
PPP1R14B-1	chr11	64245956	64248335	ENSG00000256940	64245964	64248217	+
PPP1R14B-1	chr11	64245956	64248335	ENSG00000257069	64291722	64304769	+	KCNK4-TEX40 readthrough [Source:NCBI gene (formerly Entrezgene);Acc:106780802]	KCNK4-TEX40
PPP1R14B-1	chr11	64245956	64248335	ENSG00000257086	64246939	64249494	-	novel transcript	AP001453.3
PPP1R14B-1	chr11	64245956	64248335	ENSG00000278359	64341849	64341904	-	microRNA 7155 [Source:HGNC Symbol;Acc:HGNC:50005]	MIR7155
PPP1R14B-1	chr11	64247054	64248214	ENSG00000002330	64269830	64284704	-
PPP1R14B-1	chr11	64247054	64248214	ENSG00000110011	64230278	64234286	+	DnaJ heat shock protein family (Hsp40) member C4 [Source:HGNC Symbol;Acc:HGNC:5271]	DNAJC4
PPP1R14B-1	chr11	64247054	64248214	ENSG00000126432	64318088	64321811	+
PPP1R14B-1	chr11	64247054	64248214	ENSG00000126500	64103188	64119173	+	fibronectin leucine rich transmembrane protein 1 [Source:HGNC Symbol;Acc:HGNC:3760]	FLRT1
PPP1R14B-1	chr11	64247054	64248214	ENSG00000133315	63998558	64166106	-
PPP1R14B-1	chr11	64247054	64248214	ENSG00000149743	64223799	64226254	-
PPP1R14B-1	chr11	64247054	64248214	ENSG00000149761	64225941	64230686	+
PPP1R14B-1	chr11	64247054	64248214	ENSG00000149781	64206678	64223886	+	fermitin family member 3 [Source:HGNC Symbol;Acc:HGNC:23151]	FERMT3
PPP1R14B-1	chr11	64247054	64248214	ENSG00000149782	64251523	64269150	+
PPP1R14B-1	chr11	64247054	64248214	ENSG00000162302	64359148	64372215	+
PPP1R14B-1	chr11	64247054	64248214	ENSG00000167770	63985853	64001811	+	OTU deubiquitinase, ubiquitin aldehyde binding 1 [Source:HGNC Symbol;Acc:HGNC:23077]	OTUB1
PPP1R14B-1	chr11	64247054	64248214	ENSG00000168071	64340223	64357534	+
PPP1R14B-1	chr11	64247054	64248214	ENSG00000168439	64185272	64204543	+
PPP1R14B-1	chr11	64247054	64248214	ENSG00000173113	64316460	64318084	-
PPP1R14B-1	chr11	64247054	64248214	ENSG00000173153	64305572	64316743	+
PPP1R14B-1	chr11	64247054	64248214	ENSG00000173264	64270062	64289500	+	G protein-coupled receptor 137 [Source:HGNC Symbol;Acc:HGNC:24300]	GPR137
PPP1R14B-1	chr11	64247054	64248214	ENSG00000173457	64244480	64246941	-
PPP1R14B-1	chr11	64247054	64248214	ENSG00000173486	64241003	64244132	+
PPP1R14B-1	chr11	64247054	64248214	ENSG00000173511	64234538	64238793	+	vascular endothelial growth factor B [Source:HGNC Symbol;Acc:HGNC:12681]	VEGFB
PPP1R14B-1	chr11	64247054	64248214	ENSG00000176340	63974607	63976543	+
PPP1R14B-1	chr11	64247054	64248214	ENSG00000181908	64449074	64451657	+	long intergenic non-protein coding RNA 2724 [Source:HGNC Symbol;Acc:HGNC:54241]	LINC02724
PPP1R14B-1	chr11	64247054	64248214	ENSG00000182450	64291302	64300031	+
PPP1R14B-1	chr11	64247054	64248214	ENSG00000207024	64296037	64296138	+		AP001453.1
PPP1R14B-1	chr11	64247054	64248214	ENSG00000207200	63970470	63970576	+	RNA, U6 small nuclear 45, pseudogene [Source:HGNC Symbol;Acc:HGNC:34289]	RNU6-45P
PPP1R14B-1	chr11	64247054	64248214	ENSG00000219435	64300391	64304770	+
PPP1R14B-1	chr11	64247054	64248214	ENSG00000221273	64368602	64368703	+	microRNA 1237 [Source:HGNC Symbol;Acc:HGNC:33927]	MIR1237
PPP1R14B-1	chr11	64247054	64248214	ENSG00000231492	64420391	64432670	+
PPP1R14B-1	chr11	64247054	64248214	ENSG00000231680	64394342	64395831	-	long intergenic non-protein coding RNA 2723 [Source:HGNC Symbol;Acc:HGNC:54240]	LINC02723
PPP1R14B-1	chr11	64247054	64248214	ENSG00000232500	64500853	64505386	+
PPP1R14B-1	chr11	64247054	64248214	ENSG00000236935	64325050	64329504	-	novel transcript	AP003774.2
PPP1R14B-1	chr11	64247054	64248214	ENSG00000237363	64531044	64532970	+	novel pseudogene	AP006288.1
PPP1R14B-1	chr11	64247054	64248214	ENSG00000256100	63974620	63988346	+	novel transcript	AP000721.1
PPP1R14B-1	chr11	64247054	64248214	ENSG00000256116	64229214	64234352	-	novel transcript	AP001453.2
PPP1R14B-1	chr11	64247054	64248214	ENSG00000256341	64118272	64119210	-	novel transcript	AP006333.1
PPP1R14B-1	chr11	64247054	64248214	ENSG00000256481	64081690	64087175	+	novel transcript, antisense to MACROD1	AP006333.2
PPP1R14B-1	chr11	64247054	64248214	ENSG00000256824	64035970	64103653	+	novel transcript, antisense to MACROD1	AP000721.2
PPP1R14B-1	chr11	64247054	64248214	ENSG00000256940	64245964	64248217	+
PPP1R14B-1	chr11	64247054	64248214	ENSG00000257069	64291722	64304769	+	KCNK4-TEX40 readthrough [Source:NCBI gene (formerly Entrezgene);Acc:106780802]	KCNK4-TEX40
PPP1R14B-1	chr11	64247054	64248214	ENSG00000257086	64246939	64249494	-	novel transcript	AP001453.3
PPP1R14B-1	chr11	64247054	64248214	ENSG00000278359	64341849	64341904	-	microRNA 7155 [Source:HGNC Symbol;Acc:HGNC:50005]	MIR7155
PRRC2B-1	chr9	131497479	131502757	ENSG00000107263	131576770	131740074	-	Rap guanine nucleotide exchange factor 1 [Source:HGNC Symbol;Acc:HGNC:4568]	RAPGEF1
PRRC2B-1	chr9	131497479	131502757	ENSG00000126882	131258076	131276547	-
PRRC2B-1	chr9	131497479	131502757	ENSG00000130714	131502902	131523806	+
PRRC2B-1	chr9	131497479	131502757	ENSG00000130717	131523801	131531268	-
PRRC2B-1	chr9	131497479	131502757	ENSG00000130723	131394093	131500197	+
PRRC2B-1	chr9	131497479	131502757	ENSG00000160539	131289694	131309262	+
PRRC2B-1	chr9	131497479	131502757	ENSG00000176868	131497479	131500191	-	novel transcript, antisense to PRRC2B	AL358781.1
PRRC2B-1	chr9	131497479	131502757	ENSG00000212395	131782860	131782958	-		AL160271.1
PRRC2B-1	chr9	131497479	131502757	ENSG00000226987	131240687	131241724	+	ribosomal protein L13a (RPL13A) pseudogene	AL157938.1
PRRC2B-1	chr9	131497479	131502757	ENSG00000230289	131516558	131522229	-	novel transcript	AL358781.2
PRRC2B-1	chr9	131497479	131502757	ENSG00000231018	131782570	131782813	-	eukaryotic translation initiation factor 4A1 pseudogene 3 [Source:HGNC Symbol;Acc:HGNC:37922]	EIF4A1P3
PRRC2B-1	chr9	131497479	131502757	ENSG00000231587	131490486	131490571	+	small nucleolar RNA, C/D box 62B [Source:HGNC Symbol;Acc:HGNC:23031]	SNORD62B
PRRC2B-1	chr9	131497479	131502757	ENSG00000235284	131485665	131485750	+	small nucleolar RNA, C/D box 62A [Source:HGNC Symbol;Acc:HGNC:10219]	SNORD62A
PRRC2B-1	chr9	131497479	131502757	ENSG00000240853	131725168	131725467	-	RNA, 7SL, cytoplasmic 328, pseudogene [Source:HGNC Symbol;Acc:HGNC:46344]	RN7SL328P
PRRC2B-1	chr9	131497479	131502757	ENSG00000283526	131545514	131558620	+	proline rich transmembrane protein 1B [Source:HGNC Symbol;Acc:HGNC:53642]	PRRT1B
PRRC2B-1	chr9	131498805	131500171	ENSG00000107263	131576770	131740074	-	Rap guanine nucleotide exchange factor 1 [Source:HGNC Symbol;Acc:HGNC:4568]	RAPGEF1
PRRC2B-1	chr9	131498805	131500171	ENSG00000126882	131258076	131276547	-
PRRC2B-1	chr9	131498805	131500171	ENSG00000130714	131502902	131523806	+
PRRC2B-1	chr9	131498805	131500171	ENSG00000130717	131523801	131531268	-
PRRC2B-1	chr9	131498805	131500171	ENSG00000130723	131394093	131500197	+
PRRC2B-1	chr9	131498805	131500171	ENSG00000160539	131289694	131309262	+
PRRC2B-1	chr9	131498805	131500171	ENSG00000176868	131497479	131500191	-	novel transcript, antisense to PRRC2B	AL358781.1
PRRC2B-1	chr9	131498805	131500171	ENSG00000212395	131782860	131782958	-		AL160271.1
PRRC2B-1	chr9	131498805	131500171	ENSG00000226987	131240687	131241724	+	ribosomal protein L13a (RPL13A) pseudogene	AL157938.1
PRRC2B-1	chr9	131498805	131500171	ENSG00000230289	131516558	131522229	-	novel transcript	AL358781.2
PRRC2B-1	chr9	131498805	131500171	ENSG00000231018	131782570	131782813	-	eukaryotic translation initiation factor 4A1 pseudogene 3 [Source:HGNC Symbol;Acc:HGNC:37922]	EIF4A1P3
PRRC2B-1	chr9	131498805	131500171	ENSG00000231587	131490486	131490571	+	small nucleolar RNA, C/D box 62B [Source:HGNC Symbol;Acc:HGNC:23031]	SNORD62B
PRRC2B-1	chr9	131498805	131500171	ENSG00000235284	131485665	131485750	+	small nucleolar RNA, C/D box 62A [Source:HGNC Symbol;Acc:HGNC:10219]	SNORD62A
PRRC2B-1	chr9	131498805	131500171	ENSG00000240853	131725168	131725467	-	RNA, 7SL, cytoplasmic 328, pseudogene [Source:HGNC Symbol;Acc:HGNC:46344]	RN7SL328P
PRRC2B-1	chr9	131498805	131500171	ENSG00000283526	131545514	131558620	+	proline rich transmembrane protein 1B [Source:HGNC Symbol;Acc:HGNC:53642]	PRRT1B
RASGRF1-1	chr15	78978889	78985926	ENSG00000058335	78959947	79090773	-
RASGRF1-1	chr15	78978889	78985926	ENSG00000103811	78921058	78949574	-
RASGRF1-1	chr15	78978889	78985926	ENSG00000136378	78759203	78811431	-
RASGRF1-1	chr15	78978889	78985926	ENSG00000177699	78978889	78985926	+	novel transcript, antisense to RASGRF1	AC011944.1
RASGRF1-1	chr15	78978889	78985926	ENSG00000185787	78810487	78898133	+
RASGRF1-1	chr15	78978889	78985926	ENSG00000207695	79209788	79209871	+	microRNA 184 [Source:HGNC Symbol;Acc:HGNC:31555]	MIR184
RASGRF1-1	chr15	78978889	78985926	ENSG00000238166	78752107	78753373	+	TBC1 domain family, member 2B (TBC1D2B) pseudogene	AC022748.1
RASGRF1-1	chr15	78978889	78985926	ENSG00000243711	78863247	78863729	-	ribosomal protein L21 pseudogene 116 [Source:HGNC Symbol;Acc:HGNC:36101]	RPL21P116
RASGRF1-1	chr15	78978889	78985926	ENSG00000252061	78898840	78898936	-	RNA, U6 small nuclear 415, pseudogene [Source:HGNC Symbol;Acc:HGNC:47378]	RNU6-415P
RASGRF1-1	chr15	78978889	78985926	ENSG00000259234	79191707	79283945	-
RASGRF1-1	chr15	78978889	78985926	ENSG00000259419	79236332	79237206	+	heterogeneous nuclear ribonucleoprotein C pseudogene 3 [Source:HGNC Symbol;Acc:HGNC:48815]	HNRNPCP3
RASGRF1-1	chr15	78978889	78985926	ENSG00000273512	78749833	78750107	-	dynamin 1 (DNM1) pseudogene	AC022748.3
RASGRF1-1	chr15	78978889	78985926	ENSG00000279235	78906127	78906809	+	tec	AC011944.2
RNF217-1	chr6	124563275	124962877	ENSG00000146373	124962545	125092633	+	ring finger protein 217 [Source:HGNC Symbol;Acc:HGNC:21487]	RNF217
RNF217-1	chr6	124563275	124962877	ENSG00000236548	124909093	124963039	-
RNF217-1	chr6	124639822	124962877	ENSG00000146373	124962545	125092633	+	ring finger protein 217 [Source:HGNC Symbol;Acc:HGNC:21487]	RNF217
RNF217-1	chr6	124639822	124962877	ENSG00000236548	124909093	124963039	-
RNF217-1	chr6	124639822	124962877	ENSG00000236548	124909093	124963039	-
RNF217-1	chr6	124647560	124962877	ENSG00000146373	124962545	125092633	+	ring finger protein 217 [Source:HGNC Symbol;Acc:HGNC:21487]	RNF217
RNF217-1	chr6	124647560	124962877	ENSG00000236548	124909093	124963039	-
RNF217-1	chr6	124647560	124963550	ENSG00000146373	124962545	125092633	+	ring finger protein 217 [Source:HGNC Symbol;Acc:HGNC:21487]	RNF217
RNF217-1	chr6	124647560	124963550	ENSG00000236548	124909093	124963039	-
RNF217-1	chr6	124648583	124963036	ENSG00000146373	124962545	125092633	+	ring finger protein 217 [Source:HGNC Symbol;Acc:HGNC:21487]	RNF217
RNF217-1	chr6	124648583	124963036	ENSG00000236548	124909093	124963039	-
RNF217-1	chr6	124648583	124963036	ENSG00000236548	124909093	124963039	-
RNF217-1	chr6	124648583	124963036	ENSG00000236548	124909093	124963039	-
RNF217-1	chr6	124905937	124963550	ENSG00000146373	124962545	125092633	+	ring finger protein 217 [Source:HGNC Symbol;Acc:HGNC:21487]	RNF217
RNF217-1	chr6	124905937	124963550	ENSG00000236548	124909093	124963039	-
RNF217-1	chr6	124908243	124963039	ENSG00000146373	124962545	125092633	+	ring finger protein 217 [Source:HGNC Symbol;Acc:HGNC:21487]	RNF217
RNF217-1	chr6	124908243	124963039	ENSG00000236548	124909093	124963039	-
RNF217-1	chr6	124919829	124963550	ENSG00000146373	124962545	125092633	+	ring finger protein 217 [Source:HGNC Symbol;Acc:HGNC:21487]	RNF217
RNF217-1	chr6	124919829	124963550	ENSG00000236548	124909093	124963039	-
RNF217-1	chr6	124919829	124963550	ENSG00000236548	124909093	124963039	-
RNF217-1	chr6	124935040	124963550	ENSG00000146373	124962545	125092633	+	ring finger protein 217 [Source:HGNC Symbol;Acc:HGNC:21487]	RNF217
RNF217-1	chr6	124935040	124963550	ENSG00000236548	124909093	124963039	-
RNF217-1	chr6	124941373	124963282	ENSG00000146373	124962545	125092633	+	ring finger protein 217 [Source:HGNC Symbol;Acc:HGNC:21487]	RNF217
RNF217-1	chr6	124941373	124963282	ENSG00000236548	124909093	124963039	-
RNF217-1	chr6	124945414	124963847	ENSG00000146373	124962545	125092633	+	ring finger protein 217 [Source:HGNC Symbol;Acc:HGNC:21487]	RNF217
RNF217-1	chr6	124945414	124963847	ENSG00000236548	124909093	124963039	-
RPS9-1	chr19	54230527	54234129	ENSG00000088038	54137728	54155681	+
RPS9-1	chr19	54230527	54234129	ENSG00000105609	54249431	54257301	-
RPS9-1	chr19	54230527	54234129	ENSG00000105617	54155161	54159882	-
RPS9-1	chr19	54230527	54234129	ENSG00000105618	54115410	54131719	+
RPS9-1	chr19	54230527	54234129	ENSG00000105619	54107013	54115675	-	TCF3 fusion partner [Source:HGNC Symbol;Acc:HGNC:13630]	TFPT
RPS9-1	chr19	54230527	54234129	ENSG00000125505	54173412	54189882	-
RPS9-1	chr19	54230527	54234129	ENSG00000130433	53992288	54012669	+	calcium voltage-gated channel auxiliary subunit gamma 6 [Source:HGNC Symbol;Acc:HGNC:13625]	CACNG6
RPS9-1	chr19	54230527	54234129	ENSG00000131042	54273821	54281184	-	leukocyte immunoglobulin like receptor B2 [Source:HGNC Symbol;Acc:HGNC:6606]	LILRB2
RPS9-1	chr19	54230527	54234129	ENSG00000142408	53963040	53990215	+
RPS9-1	chr19	54230527	54234129	ENSG00000167608	54160108	54173250	-	transmembrane channel like 4 [Source:HGNC Symbol;Acc:HGNC:22998]	TMC4
RPS9-1	chr19	54230527	54234129	ENSG00000167613	54351384	54370558	-
RPS9-1	chr19	54230527	54234129	ENSG00000167614	54415219	54436900	+
RPS9-1	chr19	54230527	54234129	ENSG00000167615	54448887	54462037	+	leukocyte receptor cluster member 8 [Source:HGNC Symbol;Acc:HGNC:15500]	LENG8
RPS9-1	chr19	54230527	54234129	ENSG00000167617	54465026	54473264	-
RPS9-1	chr19	54230527	54234129	ENSG00000167618	54497879	54510687	+
RPS9-1	chr19	54230527	54234129	ENSG00000170889	54200742	54249003	+
RPS9-1	chr19	54230527	54234129	ENSG00000170892	54189938	54194536	+
RPS9-1	chr19	54230527	54234129	ENSG00000170906	54102728	54109257	+
RPS9-1	chr19	54230527	54234129	ENSG00000170909	54094668	54102692	-	osteoclast associated Ig-like receptor [Source:HGNC Symbol;Acc:HGNC:29960]	OSCAR
RPS9-1	chr19	54230527	54234129	ENSG00000187116	54307070	54313139	-
RPS9-1	chr19	54230527	54234129	ENSG00000189068	54040825	54063953	-
RPS9-1	chr19	54230527	54234129	ENSG00000204577	54216278	54223506	-	leukocyte immunoglobulin like receptor B3 [Source:HGNC Symbol;Acc:HGNC:6607]	LILRB3
RPS9-1	chr19	54230527	54234129	ENSG00000212314	54263951	54264053	-	RNA, U6 small nuclear 1307, pseudogene [Source:HGNC Symbol;Acc:HGNC:48270]	RNU6-1307P
RPS9-1	chr19	54230527	54234129	ENSG00000213016	54521723	54522031	+	pseudogene similar to part of killer cell immunoglobulin-like receptor proteins	AC245036.1
RPS9-1	chr19	54230527	54234129	ENSG00000223660	54199454	54199971	-	novel transcript	AC245052.1
RPS9-1	chr19	54230527	54234129	ENSG00000224579	54209092	54209418	-	leukocyte immunoglobulin-like receptor, subfamily B (with TM and ITIM domains), member 2 (LILRB2) pseudogene	AC245052.2
RPS9-1	chr19	54230527	54234129	ENSG00000226696	54444813	54449045	-
RPS9-1	chr19	54230527	54234129	ENSG00000227407	54430654	54434698	-	novel transcript	AC245884.1
RPS9-1	chr19	54230527	54234129	ENSG00000234436	54301758	54306026	-	leukocyte immunoglobulin-like receptor, subfamily A pseudogene	AC245884.2
RPS9-1	chr19	54230527	54234129	ENSG00000235081	54229036	54230213	+	novel pseudogene	AC245052.3
RPS9-1	chr19	54230527	54234129	ENSG00000235681	54446830	54447047	+	LSM6 homolog, U6 small nuclear RNA associated (S. cerevisiae) (LSM6) pseudogene	AC245884.3
RPS9-1	chr19	54230527	54234129	ENSG00000237017	54119511	54125343	-	novel transcript	AC245052.4
RPS9-1	chr19	54230527	54234129	ENSG00000237955	54379489	54379960	+	mitochondrial ribosomal protein L40 (MRPL40) pseudogene	AC245884.4
RPS9-1	chr19	54230527	54234129	ENSG00000239961	54333185	54339150	-
RPS9-1	chr19	54230527	54234129	ENSG00000240197	54294049	54294366	-	leukocyte immunoglobulin-like receptor, subfamily A (with TM domain), member 1 (LILRA1) pseudogene	AC245884.5
RPS9-1	chr19	54230527	54234129	ENSG00000240296	54268005	54269045	+	YME1-like 1 (S. cerevisiae) (YME1L1) pseudogene	AC245052.5
RPS9-1	chr19	54230527	54234129	ENSG00000244482	54236592	54242791	-	leukocyte immunoglobulin like receptor A6 [Source:HGNC Symbol;Acc:HGNC:15495]	LILRA6
RPS9-1	chr19	54230527	54234129	ENSG00000248385	54069895	54081365	-
RPS9-1	chr19	54230527	54234129	ENSG00000249189	54246101	54247322	-	pseudogene similar to part of leukocyte immunoglobulin-like receptor	AC245052.6
RPS9-1	chr19	54230527	54234129	ENSG00000249654	54320204	54321212	-	vomeronasal 1 receptor 104 pseudogene [Source:HGNC Symbol;Acc:HGNC:37427]	VN1R104P
RPS9-1	chr19	54230527	54234129	ENSG00000250507	54328272	54331434	-	pseudogene similar to part of leukocyte immunoglobulin-like receptor proteins	AC245884.6
RPS9-1	chr19	54230527	54234129	ENSG00000251431	54298105	54298814	-	pseudogene similar to part of leukocyte immunoglobulin-like receptor proteins	AC245884.7
RPS9-1	chr19	54230527	54234129	ENSG00000264703	54282109	54282180	+	microRNA 4752 [Source:HGNC Symbol;Acc:HGNC:41803]	MIR4752
RPS9-1	chr19	54230527	54234129	ENSG00000267838	54438665	54439544	-	novel transcript	AC245884.8
RPS9-1	chr19	54230527	54234129	ENSG00000268496	54434183	54434665	+	novel transcript, sense intronic to TTYH1	AC245884.9
RPS9-1	chr19	54230527	54234129	ENSG00000269524	54224523	54224881	+	novel transcript	AC245052.7
RPS9-1	chr19	54230527	54234129	ENSG00000269873	54438010	54438346	-	novel transcript	AC245884.10
RPS9-1	chr19	54230527	54234129	ENSG00000275183	54461796	54463711	-
RPS9-1	chr19	54230527	54234129	ENSG00000275210	54308915	54337168	-	novel transcript	AC245884.11
RPS9-1	chr19	54230527	54234129	ENSG00000276206	54031412	54031504	+	heterogeneous nuclear ribonucleoprotein A3 (HNRNPA3) pseudogene	AC012314.9
RPS9-1	chr19	54230527	54234129	ENSG00000276758	54296194	54296252	-	leukocyte immunoglobulin-like receptor, subfamily A member pseudogene	AC245884.12
RPS9-1	chr19	54230527	54234129	ENSG00000284583	53982307	53982397	+	microRNA 935 [Source:HGNC Symbol;Acc:HGNC:33678]	MIR935
SAMD10-1	chr20	63970095	63978174	ENSG00000101150	63865228	63891545	+
SAMD10-1	chr20	63970095	63978174	ENSG00000101152	63895182	63936031	+
SAMD10-1	chr20	63970095	63978174	ENSG00000101161	63981135	64033100	+
SAMD10-1	chr20	63970095	63978174	ENSG00000101246	63698642	63708025	-
SAMD10-1	chr20	63970095	63978174	ENSG00000125510	64080173	64100643	+
SAMD10-1	chr20	63970095	63978174	ENSG00000125520	63739861	63743505	+
SAMD10-1	chr20	63970095	63978174	ENSG00000125522	64105820	64107171	-	neuropeptides B and W receptor 2 [Source:HGNC Symbol;Acc:HGNC:4530]	NPBWR2
SAMD10-1	chr20	63970095	63978174	ENSG00000130584	63743666	63831244	-
SAMD10-1	chr20	63970095	63978174	ENSG00000130590	63974113	63980008	-
SAMD10-1	chr20	63970095	63978174	ENSG00000171695	64083380	64084359	-	LKAAEAR motif containing 1 [Source:HGNC Symbol;Acc:HGNC:33718]	LKAAEAR1
SAMD10-1	chr20	63970095	63978174	ENSG00000171700	64073181	64079988	-
SAMD10-1	chr20	63970095	63978174	ENSG00000171703	64049836	64072347	+
SAMD10-1	chr20	63970095	63978174	ENSG00000183260	63861498	63862988	+	abhydrolase domain containing 16B [Source:HGNC Symbol;Acc:HGNC:16128]	ABHD16B
SAMD10-1	chr20	63970095	63978174	ENSG00000196132	64151791	64242253	+
SAMD10-1	chr20	63970095	63978174	ENSG00000196421	64034344	64039962	+	chromosome 20 open reading frame 204 [Source:HGNC Symbol;Acc:HGNC:27655]	C20orf204
SAMD10-1	chr20	63970095	63978174	ENSG00000196700	63956702	63969865	-
SAMD10-1	chr20	63970095	63978174	ENSG00000197114	63707465	63736142	+
SAMD10-1	chr20	63970095	63978174	ENSG00000198276	63939829	63956415	-
SAMD10-1	chr20	63970095	63978174	ENSG00000199805	63908955	63909119	+	RNA, U1 small nuclear 134, pseudogene [Source:HGNC Symbol;Acc:HGNC:48476]	RNU1-134P
SAMD10-1	chr20	63970095	63978174	ENSG00000203883	64047582	64049641	-
SAMD10-1	chr20	63970095	63978174	ENSG00000203896	63736283	63739103	+
SAMD10-1	chr20	63970095	63978174	ENSG00000207554	63942631	63942726	-	microRNA 647 [Source:HGNC Symbol;Acc:HGNC:32903]	MIR647
SAMD10-1	chr20	63970095	63978174	ENSG00000216141	63919505	63919576	+	microRNA 941-2 [Source:HGNC Symbol;Acc:HGNC:33685]	MIR941-2
SAMD10-1	chr20	63970095	63978174	ENSG00000216195	63919756	63919827	+	microRNA 941-4 [Source:HGNC Symbol;Acc:HGNC:33687]	MIR941-4
SAMD10-1	chr20	63970095	63978174	ENSG00000229299	63744689	63745958	+	novel transcript	AL121845.1
SAMD10-1	chr20	63970095	63978174	ENSG00000231208	63808076	63816521	+	ZBTB46 antisense RNA 1 [Source:HGNC Symbol;Acc:HGNC:40753]	ZBTB46-AS1
SAMD10-1	chr20	63970095	63978174	ENSG00000237371	64056803	64057084	+	novel transcript	AL355803.1
SAMD10-1	chr20	63970095	63978174	ENSG00000243509	63696668	63698684	+
SAMD10-1	chr20	63970095	63978174	ENSG00000268858	63861212	63864293	-	uncharacterized LOC112268269 [Source:NCBI gene (formerly Entrezgene);Acc:112268269]	AL118506.1
SAMD10-1	chr20	63970095	63978174	ENSG00000273047	63738270	63740398	+	novel transcript, LIME1-SLC2A4RG readthrough	AL121845.2
SAMD10-1	chr20	63970095	63978174	ENSG00000273154	63708864	63739103	+	novel protein, ZGPAT-LIME1 readthrough	AL121845.3
SAMD10-1	chr20	63970095	63978174	ENSG00000274034	64076955	64077010	-	microRNA 6813 [Source:HGNC Symbol;Acc:HGNC:50017]	MIR6813
SAMD10-1	chr20	63970095	63978174	ENSG00000274501	63730072	63730377	-	novel transcript, antisense to ZGPAT	AL121845.4
SAMD10-1	chr20	63970095	63978174	ENSG00000275842	63919868	63919939	+	microRNA 941-5 [Source:HGNC Symbol;Acc:HGNC:50845]	MIR941-5
SAMD10-1	chr20	63970095	63978174	ENSG00000279610	63843436	63843915	-	chromosome 20 open reading frame 181 [Source:HGNC Symbol;Acc:HGNC:16174]	C20orf181
SAMD10-1	chr20	63970095	63978174	ENSG00000280213	63953384	63956985	+	UCKL1 antisense RNA 1 [Source:HGNC Symbol;Acc:HGNC:31967]	UCKL1-AS1
SAMD10-1	chr20	63970095	63978174	ENSG00000283206	63919449	63919520	+	microRNA 941-1 [Source:HGNC Symbol;Acc:HGNC:33684]	MIR941-1
SAMD10-1	chr20	63970095	63978174	ENSG00000283513	63919561	63919632	+	microRNA 941-3 [Source:HGNC Symbol;Acc:HGNC:33686]	MIR941-3
SAMD10-1	chr20	63970095	63978174	ENSG00000284433	63941465	63941544	-	microRNA 1914 [Source:HGNC Symbol;Acc:HGNC:35398]	MIR1914
SCMH1-1	chr1	41241903	41264596	ENSG00000010803	41027200	41242154	-	Scm polycomb group protein homolog 1 [Source:HGNC Symbol;Acc:HGNC:19003]	SCMH1
SCMH1-1	chr1	41241903	41264596	ENSG00000127129	41478775	41484673	-
SCMH1-1	chr1	41241903	41264596	ENSG00000127129	41478775	41484673	-
SCMH1-1	chr1	41241903	41264596	ENSG00000127129	41478775	41484673	-
SCMH1-1	chr1	41241903	41264596	ENSG00000171790	41015597	41023237	-	schlafen like 1 [Source:HGNC Symbol;Acc:HGNC:26313]	SLFNL1
SCMH1-1	chr1	41241903	41264596	ENSG00000171793	40979335	41012565	+
SCMH1-1	chr1	41241903	41264596	ENSG00000171793	40979335	41012565	+
SCMH1-1	chr1	41241903	41264596	ENSG00000171793	40979335	41012565	+
SCMH1-1	chr1	41241903	41264596	ENSG00000204060	41361922	41383590	+	forkhead box O6 [Source:HGNC Symbol;Acc:HGNC:24814]	FOXO6
SCMH1-1	chr1	41241903	41264596	ENSG00000213987	41264550	41264862	-	ribosomal protein L36a (RPL36A) pseudogene	AC093151.1
SCMH1-1	chr1	41241903	41264596	ENSG00000215893	41098638	41099136	+	ribosomal protein L23a pseudogene 17 [Source:HGNC Symbol;Acc:HGNC:35904]	RPL23AP17
SCMH1-1	chr1	41241903	41264596	ENSG00000229901	41375004	41375669	-	FOXO6 antisense RNA 1 [Source:HGNC Symbol;Acc:HGNC:41066]	FOXO6-AS1
SCMH1-1	chr1	41241903	41264596	ENSG00000230638	41542069	41544310	+	novel pseudogene	AL445933.1
SCMH1-1	chr1	41241903	41264596	ENSG00000230881	41535443	41535868	+	novel transcript	AL445933.2
SCMH1-1	chr1	41241903	41264596	ENSG00000233118	40942251	40942515	-	ubiquitin conjugating enzyme E2 V1 pseudogene 8 [Source:HGNC Symbol;Acc:HGNC:44893]	UBE2V1P8
SCMH1-1	chr1	41241903	41264596	ENSG00000235358	41242373	41284861	+
SCMH1-1	chr1	41241903	41264596	ENSG00000235358	41242373	41284861	+
SCMH1-1	chr1	41241903	41264596	ENSG00000235358	41242373	41284861	+
SCMH1-1	chr1	41241903	41264596	ENSG00000252563	41466937	41467028	-	RNA, 5S ribosomal pseudogene 45 [Source:HGNC Symbol;Acc:HGNC:42821]	RNA5SP45
SCMH1-1	chr1	41241903	41264596	ENSG00000281207	41014590	41043890	+	SLFNL1 antisense RNA 1 [Source:HGNC Symbol;Acc:HGNC:44126]	SLFNL1-AS1
SCMH1-1	chr1	41241903	41265048	ENSG00000010803	41027200	41242154	-	Scm polycomb group protein homolog 1 [Source:HGNC Symbol;Acc:HGNC:19003]	SCMH1
SCMH1-1	chr1	41241903	41265048	ENSG00000127129	41478775	41484673	-
SCMH1-1	chr1	41241903	41265048	ENSG00000127129	41478775	41484673	-
SCMH1-1	chr1	41241903	41265048	ENSG00000171790	41015597	41023237	-	schlafen like 1 [Source:HGNC Symbol;Acc:HGNC:26313]	SLFNL1
SCMH1-1	chr1	41241903	41265048	ENSG00000171793	40979335	41012565	+
SCMH1-1	chr1	41241903	41265048	ENSG00000171793	40979335	41012565	+
SCMH1-1	chr1	41241903	41265048	ENSG00000204060	41361922	41383590	+	forkhead box O6 [Source:HGNC Symbol;Acc:HGNC:24814]	FOXO6
SCMH1-1	chr1	41241903	41265048	ENSG00000213987	41264550	41264862	-	ribosomal protein L36a (RPL36A) pseudogene	AC093151.1
SCMH1-1	chr1	41241903	41265048	ENSG00000215893	41098638	41099136	+	ribosomal protein L23a pseudogene 17 [Source:HGNC Symbol;Acc:HGNC:35904]	RPL23AP17
SCMH1-1	chr1	41241903	41265048	ENSG00000229901	41375004	41375669	-	FOXO6 antisense RNA 1 [Source:HGNC Symbol;Acc:HGNC:41066]	FOXO6-AS1
SCMH1-1	chr1	41241903	41265048	ENSG00000230638	41542069	41544310	+	novel pseudogene	AL445933.1
SCMH1-1	chr1	41241903	41265048	ENSG00000230881	41535443	41535868	+	novel transcript	AL445933.2
SCMH1-1	chr1	41241903	41265048	ENSG00000233118	40942251	40942515	-	ubiquitin conjugating enzyme E2 V1 pseudogene 8 [Source:HGNC Symbol;Acc:HGNC:44893]	UBE2V1P8
SCMH1-1	chr1	41241903	41265048	ENSG00000235358	41242373	41284861	+
SCMH1-1	chr1	41241903	41265048	ENSG00000235358	41242373	41284861	+
SCMH1-1	chr1	41241903	41265048	ENSG00000252563	41466937	41467028	-	RNA, 5S ribosomal pseudogene 45 [Source:HGNC Symbol;Acc:HGNC:42821]	RNA5SP45
SCMH1-1	chr1	41241903	41265048	ENSG00000281207	41014590	41043890	+	SLFNL1 antisense RNA 1 [Source:HGNC Symbol;Acc:HGNC:44126]	SLFNL1-AS1
SCMH1-1	chr1	41242340	41264558	ENSG00000010803	41027200	41242154	-	Scm polycomb group protein homolog 1 [Source:HGNC Symbol;Acc:HGNC:19003]	SCMH1
SCMH1-1	chr1	41242340	41264558	ENSG00000127129	41478775	41484673	-
SCMH1-1	chr1	41242340	41264558	ENSG00000171790	41015597	41023237	-	schlafen like 1 [Source:HGNC Symbol;Acc:HGNC:26313]	SLFNL1
SCMH1-1	chr1	41242340	41264558	ENSG00000171793	40979335	41012565	+
SCMH1-1	chr1	41242340	41264558	ENSG00000204060	41361922	41383590	+	forkhead box O6 [Source:HGNC Symbol;Acc:HGNC:24814]	FOXO6
SCMH1-1	chr1	41242340	41264558	ENSG00000213987	41264550	41264862	-	ribosomal protein L36a (RPL36A) pseudogene	AC093151.1
SCMH1-1	chr1	41242340	41264558	ENSG00000215893	41098638	41099136	+	ribosomal protein L23a pseudogene 17 [Source:HGNC Symbol;Acc:HGNC:35904]	RPL23AP17
SCMH1-1	chr1	41242340	41264558	ENSG00000229901	41375004	41375669	-	FOXO6 antisense RNA 1 [Source:HGNC Symbol;Acc:HGNC:41066]	FOXO6-AS1
SCMH1-1	chr1	41242340	41264558	ENSG00000230638	41542069	41544310	+	novel pseudogene	AL445933.1
SCMH1-1	chr1	41242340	41264558	ENSG00000230881	41535443	41535868	+	novel transcript	AL445933.2
SCMH1-1	chr1	41242340	41264558	ENSG00000235358	41242373	41284861	+
SCMH1-1	chr1	41242340	41264558	ENSG00000252563	41466937	41467028	-	RNA, 5S ribosomal pseudogene 45 [Source:HGNC Symbol;Acc:HGNC:42821]	RNA5SP45
SCMH1-1	chr1	41242340	41264558	ENSG00000281207	41014590	41043890	+	SLFNL1 antisense RNA 1 [Source:HGNC Symbol;Acc:HGNC:44126]	SLFNL1-AS1
SCMH1-1	chr1	41242343	41263977	ENSG00000010803	41027200	41242154	-	Scm polycomb group protein homolog 1 [Source:HGNC Symbol;Acc:HGNC:19003]	SCMH1
SCMH1-1	chr1	41242343	41263977	ENSG00000127129	41478775	41484673	-
SCMH1-1	chr1	41242343	41263977	ENSG00000171790	41015597	41023237	-	schlafen like 1 [Source:HGNC Symbol;Acc:HGNC:26313]	SLFNL1
SCMH1-1	chr1	41242343	41263977	ENSG00000171793	40979335	41012565	+
SCMH1-1	chr1	41242343	41263977	ENSG00000204060	41361922	41383590	+	forkhead box O6 [Source:HGNC Symbol;Acc:HGNC:24814]	FOXO6
SCMH1-1	chr1	41242343	41263977	ENSG00000213987	41264550	41264862	-	ribosomal protein L36a (RPL36A) pseudogene	AC093151.1
SCMH1-1	chr1	41242343	41263977	ENSG00000215893	41098638	41099136	+	ribosomal protein L23a pseudogene 17 [Source:HGNC Symbol;Acc:HGNC:35904]	RPL23AP17
SCMH1-1	chr1	41242343	41263977	ENSG00000229901	41375004	41375669	-	FOXO6 antisense RNA 1 [Source:HGNC Symbol;Acc:HGNC:41066]	FOXO6-AS1
SCMH1-1	chr1	41242343	41263977	ENSG00000230638	41542069	41544310	+	novel pseudogene	AL445933.1
SCMH1-1	chr1	41242343	41263977	ENSG00000230881	41535443	41535868	+	novel transcript	AL445933.2
SCMH1-1	chr1	41242343	41263977	ENSG00000235358	41242373	41284861	+
SCMH1-1	chr1	41242343	41263977	ENSG00000252563	41466937	41467028	-	RNA, 5S ribosomal pseudogene 45 [Source:HGNC Symbol;Acc:HGNC:42821]	RNA5SP45
SCMH1-1	chr1	41242343	41263977	ENSG00000281207	41014590	41043890	+	SLFNL1 antisense RNA 1 [Source:HGNC Symbol;Acc:HGNC:44126]	SLFNL1-AS1
SCMH1-1	chr1	41242343	41301647	ENSG00000010803	41027200	41242154	-	Scm polycomb group protein homolog 1 [Source:HGNC Symbol;Acc:HGNC:19003]	SCMH1
SCMH1-1	chr1	41242343	41301647	ENSG00000127129	41478775	41484673	-
SCMH1-1	chr1	41242343	41301647	ENSG00000171790	41015597	41023237	-	schlafen like 1 [Source:HGNC Symbol;Acc:HGNC:26313]	SLFNL1
SCMH1-1	chr1	41242343	41301647	ENSG00000171793	40979335	41012565	+
SCMH1-1	chr1	41242343	41301647	ENSG00000204060	41361922	41383590	+	forkhead box O6 [Source:HGNC Symbol;Acc:HGNC:24814]	FOXO6
SCMH1-1	chr1	41242343	41301647	ENSG00000213987	41264550	41264862	-	ribosomal protein L36a (RPL36A) pseudogene	AC093151.1
SCMH1-1	chr1	41242343	41301647	ENSG00000215893	41098638	41099136	+	ribosomal protein L23a pseudogene 17 [Source:HGNC Symbol;Acc:HGNC:35904]	RPL23AP17
SCMH1-1	chr1	41242343	41301647	ENSG00000229901	41375004	41375669	-	FOXO6 antisense RNA 1 [Source:HGNC Symbol;Acc:HGNC:41066]	FOXO6-AS1
SCMH1-1	chr1	41242343	41301647	ENSG00000230638	41542069	41544310	+	novel pseudogene	AL445933.1
SCMH1-1	chr1	41242343	41301647	ENSG00000230881	41535443	41535868	+	novel transcript	AL445933.2
SCMH1-1	chr1	41242343	41301647	ENSG00000235358	41242373	41284861	+
SCMH1-1	chr1	41242343	41301647	ENSG00000252563	41466937	41467028	-	RNA, 5S ribosomal pseudogene 45 [Source:HGNC Symbol;Acc:HGNC:42821]	RNA5SP45
SCMH1-1	chr1	41242343	41301647	ENSG00000281207	41014590	41043890	+	SLFNL1 antisense RNA 1 [Source:HGNC Symbol;Acc:HGNC:44126]	SLFNL1-AS1
SCMH1-1	chr1	41242362	41265048	ENSG00000010803	41027200	41242154	-	Scm polycomb group protein homolog 1 [Source:HGNC Symbol;Acc:HGNC:19003]	SCMH1
SCMH1-1	chr1	41242362	41265048	ENSG00000127129	41478775	41484673	-
SCMH1-1	chr1	41242362	41265048	ENSG00000171790	41015597	41023237	-	schlafen like 1 [Source:HGNC Symbol;Acc:HGNC:26313]	SLFNL1
SCMH1-1	chr1	41242362	41265048	ENSG00000171793	40979335	41012565	+
SCMH1-1	chr1	41242362	41265048	ENSG00000204060	41361922	41383590	+	forkhead box O6 [Source:HGNC Symbol;Acc:HGNC:24814]	FOXO6
SCMH1-1	chr1	41242362	41265048	ENSG00000213987	41264550	41264862	-	ribosomal protein L36a (RPL36A) pseudogene	AC093151.1
SCMH1-1	chr1	41242362	41265048	ENSG00000215893	41098638	41099136	+	ribosomal protein L23a pseudogene 17 [Source:HGNC Symbol;Acc:HGNC:35904]	RPL23AP17
SCMH1-1	chr1	41242362	41265048	ENSG00000229901	41375004	41375669	-	FOXO6 antisense RNA 1 [Source:HGNC Symbol;Acc:HGNC:41066]	FOXO6-AS1
SCMH1-1	chr1	41242362	41265048	ENSG00000230638	41542069	41544310	+	novel pseudogene	AL445933.1
SCMH1-1	chr1	41242362	41265048	ENSG00000230881	41535443	41535868	+	novel transcript	AL445933.2
SCMH1-1	chr1	41242362	41265048	ENSG00000235358	41242373	41284861	+
SCMH1-1	chr1	41242362	41265048	ENSG00000252563	41466937	41467028	-	RNA, 5S ribosomal pseudogene 45 [Source:HGNC Symbol;Acc:HGNC:42821]	RNA5SP45
SCMH1-1	chr1	41242362	41265048	ENSG00000281207	41014590	41043890	+	SLFNL1 antisense RNA 1 [Source:HGNC Symbol;Acc:HGNC:44126]	SLFNL1-AS1
SCMH1-1	chr1	41242362	41284924	ENSG00000010803	41027200	41242154	-	Scm polycomb group protein homolog 1 [Source:HGNC Symbol;Acc:HGNC:19003]	SCMH1
SCMH1-1	chr1	41242362	41284924	ENSG00000127129	41478775	41484673	-
SCMH1-1	chr1	41242362	41284924	ENSG00000171790	41015597	41023237	-	schlafen like 1 [Source:HGNC Symbol;Acc:HGNC:26313]	SLFNL1
SCMH1-1	chr1	41242362	41284924	ENSG00000171793	40979335	41012565	+
SCMH1-1	chr1	41242362	41284924	ENSG00000204060	41361922	41383590	+	forkhead box O6 [Source:HGNC Symbol;Acc:HGNC:24814]	FOXO6
SCMH1-1	chr1	41242362	41284924	ENSG00000213987	41264550	41264862	-	ribosomal protein L36a (RPL36A) pseudogene	AC093151.1
SCMH1-1	chr1	41242362	41284924	ENSG00000215893	41098638	41099136	+	ribosomal protein L23a pseudogene 17 [Source:HGNC Symbol;Acc:HGNC:35904]	RPL23AP17
SCMH1-1	chr1	41242362	41284924	ENSG00000229901	41375004	41375669	-	FOXO6 antisense RNA 1 [Source:HGNC Symbol;Acc:HGNC:41066]	FOXO6-AS1
SCMH1-1	chr1	41242362	41284924	ENSG00000230638	41542069	41544310	+	novel pseudogene	AL445933.1
SCMH1-1	chr1	41242362	41284924	ENSG00000230881	41535443	41535868	+	novel transcript	AL445933.2
SCMH1-1	chr1	41242362	41284924	ENSG00000235358	41242373	41284861	+
SCMH1-1	chr1	41242362	41284924	ENSG00000252563	41466937	41467028	-	RNA, 5S ribosomal pseudogene 45 [Source:HGNC Symbol;Acc:HGNC:42821]	RNA5SP45
SCMH1-1	chr1	41242362	41284924	ENSG00000281207	41014590	41043890	+	SLFNL1 antisense RNA 1 [Source:HGNC Symbol;Acc:HGNC:44126]	SLFNL1-AS1
SERPINE1-1	chr7	101137922	101138272	ENSG00000087077	100867138	100873454	+
SERPINE1-1	chr7	101137922	101138272	ENSG00000087085	100889994	100896974	-
[truncated: 4,890 more rows]

## Sheet: control-24hpi
lnc_gene	lnc_chromosome	lnc_start	lnc_end	GeneStableID_x	gene_start	gene_end	e	GeneDescription	GeneName
ABHD2-1	chr15	89201091	89201768	ENSG00000140519	89471398	89496613	-
ABHD2-1	chr15	89201091	89201768	ENSG00000140521	89305198	89334861	-
ABHD2-1	chr15	89201091	89201768	ENSG00000140522	89209869	89221751	-
ABHD2-1	chr15	89201091	89201768	ENSG00000140525	89243949	89317261	+
ABHD2-1	chr15	89201091	89201768	ENSG00000140526	89087459	89202360	+
ABHD2-1	chr15	89201091	89201768	ENSG00000239151	89120779	89120840	+	RNA, U7 small nuclear 195 pseudogene [Source:HGNC Symbol;Acc:HGNC:45729]	RNU7-195P
ABHD2-1	chr15	89201091	89201768	ENSG00000255571	89361579	89398487	+
ABHD2-1	chr15	89201091	89201768	ENSG00000259350	88952683	88953460	+	high mobility group nucleosome binding domain 1 (HMGN1) pseudogene	AC067805.1
ABHD2-1	chr15	89201091	89201768	ENSG00000259489	88960070	88961046	+	keratin 18 pseudogene 47 [Source:HGNC Symbol;Acc:HGNC:33417]	KRT18P47
ABHD2-1	chr15	89201091	89201768	ENSG00000259699	89135547	89136495	-	high mobility group box 1 pseudogene 8 [Source:HGNC Symbol;Acc:HGNC:13319]	HMGB1P8
ABHD2-1	chr15	89201091	89201768	ENSG00000259948	89201091	89201768	-	VAMP (vesicle-associated membrane protein)-associated protein A, 33kDa (VAPA) pseudogene	AC124068.1
ABHD2-1	chr15	89201091	89201768	ENSG00000260123	89041223	89082819	+
ABHD2-1	chr15	89201091	89201768	ENSG00000260275	89037977	89038286	-	intraflagellar transport 20 homolog (Chlamydomonas) (IFT20) pseudogene	AC013565.2
ABHD2-1	chr15	89201091	89201768	ENSG00000261407	89087078	89088267	-
ABHD2-1	chr15	89201091	89201768	ENSG00000261441	89335053	89336161	+	novel transcript, antisense to POLG	AC124068.2
ABHD2-1	chr15	89201091	89201768	ENSG00000261549	88989519	88990245	-	capping protein (actin filament) muscle Z-line, alpha 2 (CAPZA2) pseudogene	AC107954.1
ABHD2-1	chr15	89201091	89201768	ENSG00000275101	89326739	89326810	-	microRNA 6766 [Source:HGNC Symbol;Acc:HGNC:49941]	MIR6766
ABHD2-1	chr15	89201091	89201768	ENSG00000279708	89358841	89360377	+	tec	AC133637.1
ABHD2-1	chr15	89201091	89201768	ENSG00000284329	89368017	89368106	+	microRNA 9-3 [Source:HGNC Symbol;Acc:HGNC:31646]	MIR9-3
AC019117.3-2	chr7	17405479	17524596	ENSG00000106546	17298622	17346152	+
AC019117.3-2	chr7	17405479	17524596	ENSG00000199473	17373201	17373326	-	Small nucleolar RNA SNORA63 [Source:RFAM;Acc:RF00092]	SNORA63
AC019117.3-2	chr7	17405479	17524596	ENSG00000228675	17679549	17680659	+	novel transcript	AC006482.1
AC019117.3-2	chr7	17405479	17524596	ENSG00000236039	17405479	17558909	-
AC019117.3-2	chr7	17405479	17524596	ENSG00000236318	17374867	17467256	+	renal clear cell carcinoma-associated transcript 333	AC019117.2
AC019117.3-2	chr7	17405479	17524596	ENSG00000237773	17279834	17299357	-
AC019117.3-2	chr7	17405479	17524596	ENSG00000278569	17205652	17205928	+	Metazoan signal recognition particle RNA [Source:RFAM;Acc:RF00017]	Metazoa_SRP
AC019117.3-2	chr7	17405479	17524596	ENSG00000283321	17299295	17467234	+	novel protein	AC019117.3
AC019117.3-2	chr7	17433078	17524596	ENSG00000106546	17298622	17346152	+
AC019117.3-2	chr7	17433078	17524596	ENSG00000199473	17373201	17373326	-	Small nucleolar RNA SNORA63 [Source:RFAM;Acc:RF00092]	SNORA63
AC019117.3-2	chr7	17433078	17524596	ENSG00000228675	17679549	17680659	+	novel transcript	AC006482.1
AC019117.3-2	chr7	17433078	17524596	ENSG00000236039	17405479	17558909	-
AC019117.3-2	chr7	17433078	17524596	ENSG00000236318	17374867	17467256	+	renal clear cell carcinoma-associated transcript 333	AC019117.2
AC019117.3-2	chr7	17433078	17524596	ENSG00000237773	17279834	17299357	-
AC019117.3-2	chr7	17433078	17524596	ENSG00000278569	17205652	17205928	+	Metazoan signal recognition particle RNA [Source:RFAM;Acc:RF00017]	Metazoa_SRP
AC019117.3-2	chr7	17433078	17524596	ENSG00000283321	17299295	17467234	+	novel protein	AC019117.3
AC019117.3-2	chr7	17433252	17457436	ENSG00000106546	17298622	17346152	+
AC019117.3-2	chr7	17433252	17457436	ENSG00000199473	17373201	17373326	-	Small nucleolar RNA SNORA63 [Source:RFAM;Acc:RF00092]	SNORA63
AC019117.3-2	chr7	17433252	17457436	ENSG00000228675	17679549	17680659	+	novel transcript	AC006482.1
AC019117.3-2	chr7	17433252	17457436	ENSG00000236039	17405479	17558909	-
AC019117.3-2	chr7	17433252	17457436	ENSG00000236318	17374867	17467256	+	renal clear cell carcinoma-associated transcript 333	AC019117.2
AC019117.3-2	chr7	17433252	17457436	ENSG00000237773	17279834	17299357	-
AC019117.3-2	chr7	17433252	17457436	ENSG00000278569	17205652	17205928	+	Metazoan signal recognition particle RNA [Source:RFAM;Acc:RF00017]	Metazoa_SRP
AC019117.3-2	chr7	17433252	17457436	ENSG00000283321	17299295	17467234	+	novel protein	AC019117.3
AC019117.3-2	chr7	17463246	17524596	ENSG00000106546	17298622	17346152	+
AC019117.3-2	chr7	17463246	17524596	ENSG00000199473	17373201	17373326	-	Small nucleolar RNA SNORA63 [Source:RFAM;Acc:RF00092]	SNORA63
AC019117.3-2	chr7	17463246	17524596	ENSG00000228675	17679549	17680659	+	novel transcript	AC006482.1
AC019117.3-2	chr7	17463246	17524596	ENSG00000236039	17405479	17558909	-
AC019117.3-2	chr7	17463246	17524596	ENSG00000236318	17374867	17467256	+	renal clear cell carcinoma-associated transcript 333	AC019117.2
AC019117.3-2	chr7	17463246	17524596	ENSG00000237773	17279834	17299357	-
AC019117.3-2	chr7	17463246	17524596	ENSG00000278569	17205652	17205928	+	Metazoan signal recognition particle RNA [Source:RFAM;Acc:RF00017]	Metazoa_SRP
AC019117.3-2	chr7	17463246	17524596	ENSG00000283321	17299295	17467234	+	novel protein	AC019117.3
AC019117.3-2	chr7	17463445	17558909	ENSG00000106546	17298622	17346152	+
AC019117.3-2	chr7	17463445	17558909	ENSG00000199473	17373201	17373326	-	Small nucleolar RNA SNORA63 [Source:RFAM;Acc:RF00092]	SNORA63
AC019117.3-2	chr7	17463445	17558909	ENSG00000228675	17679549	17680659	+	novel transcript	AC006482.1
AC019117.3-2	chr7	17463445	17558909	ENSG00000236039	17405479	17558909	-
AC019117.3-2	chr7	17463445	17558909	ENSG00000236318	17374867	17467256	+	renal clear cell carcinoma-associated transcript 333	AC019117.2
AC019117.3-2	chr7	17463445	17558909	ENSG00000237773	17279834	17299357	-
AC019117.3-2	chr7	17463445	17558909	ENSG00000278569	17205652	17205928	+	Metazoan signal recognition particle RNA [Source:RFAM;Acc:RF00017]	Metazoa_SRP
AC019117.3-2	chr7	17463445	17558909	ENSG00000283321	17299295	17467234	+	novel protein	AC019117.3
ADCK1-1	chr14	77814342	77823637	ENSG00000063761	77800083	77935012	+
ADCK1-1	chr14	77814342	77823637	ENSG00000100601	77672404	77708020	-
ADCK1-1	chr14	77814342	77823637	ENSG00000100603	77717599	77761207	-
ADCK1-1	chr14	77814342	77823637	ENSG00000119705	77708071	77761104	+
ADCK1-1	chr14	77814342	77823637	ENSG00000197734	77760830	77769742	+
ADCK1-1	chr14	77814342	77823637	ENSG00000199440	77821030	77821142	-		AC008372.1
ADCK1-1	chr14	77814342	77823637	ENSG00000239272	77683202	77683989	-	ribosomal protein L21 pseudogene 10 [Source:HGNC Symbol;Acc:HGNC:19795]	RPL21P10
ADCK1-1	chr14	77814342	77823637	ENSG00000240233	77547566	77547846	-	RNA, 7SL, cytoplasmic 587, pseudogene [Source:HGNC Symbol;Acc:HGNC:46603]	RN7SL587P
ADCK1-1	chr14	77814342	77823637	ENSG00000258421	78059942	78060278	-	frataxin pseudogene 1 [Source:HGNC Symbol;Acc:HGNC:20012]	FXNP1
ADCK1-1	chr14	77814342	77823637	ENSG00000258668	77652827	77653055	-	cytochrome c oxidase subunit 6C pseudogene 11 [Source:HGNC Symbol;Acc:HGNC:49363]	COX6CP11
ADCK1-1	chr14	77814342	77823637	ENSG00000258917	77696591	77697377	+	zinc finger MYND-type containing 19 pseudogene 1 [Source:HGNC Symbol;Acc:HGNC:44540]	ZMYND19P1
ADPRH-1	chr3	119579212	119579682	ENSG00000031081	119294373	119420714	+
ADPRH-1	chr3	119579212	119579682	ENSG00000113845	119498532	119525090	+
ADPRH-1	chr3	119579212	119579682	ENSG00000121577	119636457	119665324	-	popeye domain containing 2 [Source:HGNC Symbol;Acc:HGNC:17648]	POPDC2
ADPRH-1	chr3	119579212	119579682	ENSG00000121594	119524293	119559602	-
ADPRH-1	chr3	119579212	119579682	ENSG00000138495	119654513	119677454	-	cytochrome c oxidase copper chaperone COX17 [Source:HGNC Symbol;Acc:HGNC:2264]	COX17
ADPRH-1	chr3	119579212	119579682	ENSG00000144837	119597842	119629811	+
ADPRH-1	chr3	119579212	119579682	ENSG00000144843	119579268	119589945	+	ADP-ribosylarginine hydrolase [Source:HGNC Symbol;Acc:HGNC:269]	ADPRH
ADPRH-1	chr3	119579212	119579682	ENSG00000144852	119780484	119818485	+
ADPRH-1	chr3	119579212	119579682	ENSG00000163389	119468938	119494708	+
ADPRH-1	chr3	119579212	119579682	ENSG00000176142	119429500	119468830	-
ADPRH-1	chr3	119579212	119579682	ENSG00000183833	119703022	119767102	+	cilia and flagella associated protein 91 [Source:HGNC Symbol;Acc:HGNC:24010]	CFAP91
ADPRH-1	chr3	119579212	119579682	ENSG00000207310	119341834	119341940	-	RNA, U6 small nuclear 1127, pseudogene [Source:HGNC Symbol;Acc:HGNC:48090]	RNU6-1127P
ADPRH-1	chr3	119579212	119579682	ENSG00000239994	119744139	119750350	-	novel transcript	AC069444.1
ADPRH-1	chr3	119579212	119579682	ENSG00000240471	119791829	119792553	+	prohibitin pseudogene 8 [Source:HGNC Symbol;Acc:HGNC:39287]	PHBP8
ADPRH-1	chr3	119579212	119579682	ENSG00000241155	119314293	119322760	-	ARHGAP31 antisense RNA 1 [Source:HGNC Symbol;Acc:HGNC:41235]	ARHGAP31-AS1
ADPRH-1	chr3	119579212	119579682	ENSG00000242052	119635526	119636150	-	ribosomal protein L10 pseudogene 7 [Source:HGNC Symbol;Acc:HGNC:35974]	RPL10P7
ADPRH-1	chr3	119579212	119579682	ENSG00000242829	119298665	119299012	+	ribosomal protein S26 pseudogene 21 [Source:HGNC Symbol;Acc:HGNC:36469]	RPS26P21
ADPRH-1	chr3	119579212	119579682	ENSG00000272662	119497678	119498181	-	novel transcript	AC073352.1
ADPRH-1	chr3	119579212	119579682	ENSG00000272967	119579212	119579650	-	novel transcript, antisense to ADPRH	AC073352.2
AKAP13-AS-4	chr15	85578865	85579795	ENSG00000170776	85380571	85749358	+
AKAP13-AS-4	chr15	85578865	85579795	ENSG00000183655	85759323	85795030	-
AKAP13-AS-4	chr15	85578865	85579795	ENSG00000202081	85651522	85651628	-	RNA, U6 small nuclear 1280, pseudogene [Source:HGNC Symbol;Acc:HGNC:48243]	RNU6-1280P
AKAP13-AS-4	chr15	85578865	85579795	ENSG00000221634	85770496	85770578	-	microRNA 1276 [Source:HGNC Symbol;Acc:HGNC:35347]	MIR1276
AKAP13-AS-4	chr15	85578865	85579795	ENSG00000251891	85389823	85389884	-	RNA, U7 small nuclear 79 pseudogene [Source:HGNC Symbol;Acc:HGNC:34175]	RNU7-79P
AKAP13-AS-4	chr15	85578865	85579795	ENSG00000252931	85821855	85821957	+	RNA, U6 small nuclear 231, pseudogene [Source:HGNC Symbol;Acc:HGNC:47194]	RNU6-231P
AKAP13-AS-4	chr15	85578865	85579795	ENSG00000259195	85770990	85771163	+	ribosomal protein S2 (RPS2) pseudogene	AC021739.1
AKAP13-AS-4	chr15	85578865	85579795	ENSG00000259276	85621264	85627689	-	novel transcript, antisense to AKAP13	AC087286.1
AKAP13-AS-4	chr15	85578865	85579795	ENSG00000259367	85619623	85670948	-	novel transcript, antisense to AKAP13	AC087286.2
AKAP13-AS-4	chr15	85578865	85579795	ENSG00000259375	85579046	85580178	-	novel transcript, antisense to AKAP13	AC087286.3
AKAP13-AS-4	chr15	85578865	85579795	ENSG00000259407	85744109	85750281	-	novel transcript, antisense to AKAP13	AC021739.2
AKAP13-AS-4	chr15	85578865	85579795	ENSG00000259416	85754941	85756237	-	long intergenic non-protein coding RNA 2883 [Source:HGNC Symbol;Acc:HGNC:54806]	LINC02883
AKAP13-AS-4	chr15	85578865	85579795	ENSG00000259453	85701109	85702771	+	novel transcript, sense intronic to AKAP13	AC087286.4
AKAP13-AS-4	chr15	85578865	85579795	ENSG00000259544	85726115	85727227	-	novel transcript, antisense to AKAP13	AC021739.3
AKAP13-AS-4	chr15	85578865	85579795	ENSG00000259630	85415228	85415633	+	fatty acid binding protein 5 (psoriasis-associated) (FABP5) pseudogene	AC104046.1
AKAP13-AS-4	chr15	85578865	85579795	ENSG00000259762	85750336	85752901	-	novel transcript, antisense to AKAP13	AC021739.4
AKAP13-AS-4	chr15	85578865	85579795	ENSG00000264406	85825635	85825730	+	microRNA 548ap [Source:HGNC Symbol;Acc:HGNC:43465]	MIR548AP
AKAP13-AS-4	chr15	85578865	85579795	ENSG00000284160	85380596	85380662	+	microRNA 7706 [Source:HGNC Symbol;Acc:HGNC:50110]	MIR7706
AKAP13-AS-4	chr15	85579046	85580178	ENSG00000170776	85380571	85749358	+
AKAP13-AS-4	chr15	85579046	85580178	ENSG00000183655	85759323	85795030	-
AKAP13-AS-4	chr15	85579046	85580178	ENSG00000202081	85651522	85651628	-	RNA, U6 small nuclear 1280, pseudogene [Source:HGNC Symbol;Acc:HGNC:48243]	RNU6-1280P
AKAP13-AS-4	chr15	85579046	85580178	ENSG00000221634	85770496	85770578	-	microRNA 1276 [Source:HGNC Symbol;Acc:HGNC:35347]	MIR1276
AKAP13-AS-4	chr15	85579046	85580178	ENSG00000251891	85389823	85389884	-	RNA, U7 small nuclear 79 pseudogene [Source:HGNC Symbol;Acc:HGNC:34175]	RNU7-79P
AKAP13-AS-4	chr15	85579046	85580178	ENSG00000252931	85821855	85821957	+	RNA, U6 small nuclear 231, pseudogene [Source:HGNC Symbol;Acc:HGNC:47194]	RNU6-231P
AKAP13-AS-4	chr15	85579046	85580178	ENSG00000259195	85770990	85771163	+	ribosomal protein S2 (RPS2) pseudogene	AC021739.1
AKAP13-AS-4	chr15	85579046	85580178	ENSG00000259276	85621264	85627689	-	novel transcript, antisense to AKAP13	AC087286.1
AKAP13-AS-4	chr15	85579046	85580178	ENSG00000259367	85619623	85670948	-	novel transcript, antisense to AKAP13	AC087286.2
AKAP13-AS-4	chr15	85579046	85580178	ENSG00000259375	85579046	85580178	-	novel transcript, antisense to AKAP13	AC087286.3
AKAP13-AS-4	chr15	85579046	85580178	ENSG00000259407	85744109	85750281	-	novel transcript, antisense to AKAP13	AC021739.2
AKAP13-AS-4	chr15	85579046	85580178	ENSG00000259416	85754941	85756237	-	long intergenic non-protein coding RNA 2883 [Source:HGNC Symbol;Acc:HGNC:54806]	LINC02883
AKAP13-AS-4	chr15	85579046	85580178	ENSG00000259453	85701109	85702771	+	novel transcript, sense intronic to AKAP13	AC087286.4
AKAP13-AS-4	chr15	85579046	85580178	ENSG00000259544	85726115	85727227	-	novel transcript, antisense to AKAP13	AC021739.3
AKAP13-AS-4	chr15	85579046	85580178	ENSG00000259630	85415228	85415633	+	fatty acid binding protein 5 (psoriasis-associated) (FABP5) pseudogene	AC104046.1
AKAP13-AS-4	chr15	85579046	85580178	ENSG00000259762	85750336	85752901	-	novel transcript, antisense to AKAP13	AC021739.4
AKAP13-AS-4	chr15	85579046	85580178	ENSG00000264406	85825635	85825730	+	microRNA 548ap [Source:HGNC Symbol;Acc:HGNC:43465]	MIR548AP
AKAP13-AS-4	chr15	85579046	85580178	ENSG00000284160	85380596	85380662	+	microRNA 7706 [Source:HGNC Symbol;Acc:HGNC:50110]	MIR7706
AKAP2-1	chr9	110170269	110176435	ENSG00000136810	110243811	110256640	-
AKAP2-1	chr9	110170269	110176435	ENSG00000188959	110190048	110208189	-	chromosome 9 open reading frame 152 [Source:HGNC Symbol;Acc:HGNC:31455]	C9orf152
AKAP2-1	chr9	110170269	110176435	ENSG00000204193	110303521	110337884	-
AKAP2-1	chr9	110170269	110176435	ENSG00000206658	110369592	110369698	-	RNA, U6 small nuclear 1039, pseudogene [Source:HGNC Symbol;Acc:HGNC:48002]	RNU6-1039P
AKAP2-1	chr9	110170269	110176435	ENSG00000228053	110024881	110025358	-	ribosomal protein L21 (RPL21) pseudogene	AL158823.1
AKAP2-1	chr9	110170269	110176435	ENSG00000241978	110048598	110172512	+
AMZ2-1	chr17	68246629	68247938	ENSG00000070540	68420948	68457513	-
AMZ2-1	chr17	68246629	68247938	ENSG00000108932	68267026	68291267	-
AMZ2-1	chr17	68246629	68247938	ENSG00000141337	68259182	68422731	+	arylsulfatase G [Source:HGNC Symbol;Acc:HGNC:24102]	ARSG
AMZ2-1	chr17	68246629	68247938	ENSG00000182481	68035519	68046842	+
AMZ2-1	chr17	68246629	68247938	ENSG00000186665	67991101	67996431	-	chromosome 17 open reading frame 58 [Source:HGNC Symbol;Acc:HGNC:27568]	C17orf58
AMZ2-1	chr17	68246629	68247938	ENSG00000196704	68247574	68257164	+
AMZ2-1	chr17	68246629	68247938	ENSG00000207561	68424451	68424548	-	microRNA 635 [Source:HGNC Symbol;Acc:HGNC:32891]	MIR635
AMZ2-1	chr17	68246629	68247938	ENSG00000237854	68101908	68115518	+	long intergenic non-protein coding RNA 674 [Source:HGNC Symbol;Acc:HGNC:44355]	LINC00674
AMZ2-1	chr17	68246629	68247938	ENSG00000265052	67977698	67977972	+	RNA, 7SL, cytoplasmic 622, pseudogene [Source:HGNC Symbol;Acc:HGNC:46638]	RN7SL622P
AMZ2-1	chr17	68246629	68247938	ENSG00000265055	68096046	68101474	-
AMZ2-1	chr17	68246629	68247938	ENSG00000265100	68246629	68247938	-	novel transcript, antisense to AMZ2	AC005332.1
AMZ2-1	chr17	68246629	68247938	ENSG00000266117	68095068	68095757	+	F-box protein 36 pseudogene 1 [Source:HGNC Symbol;Acc:HGNC:50363]	FBXO36P1
AMZ2-1	chr17	68246629	68247938	ENSG00000266717	67950885	67951746	-	novel transcript, antisense to BPTF	AC134407.1
AMZ2-1	chr17	68246629	68247938	ENSG00000267009	68413623	68524949	+	novel transcript	AC007780.1
AMZ2-1	chr17	68246629	68247938	ENSG00000267023	68125777	68152468	-	leucine rich repeat containing 37 member A16, pseudogene [Source:HGNC Symbol;Acc:HGNC:43820]	LRRC37A16P
AMZ2-1	chr17	68246629	68247938	ENSG00000267352	68134675	68135604	-	SH3 domain containing GRB2 like 1, endophilin A2 pseudogene 3 [Source:HGNC Symbol;Acc:HGNC:10837]	SH3GL1P3
AMZ2-1	chr17	68246629	68247938	ENSG00000267472	68198921	68199596	+	Rho GTPase activating protein 27 pseudogene 2 [Source:HGNC Symbol;Acc:HGNC:53771]	ARHGAP27P2
AMZ2-1	chr17	68246629	68247938	ENSG00000267708	68152776	68159043	-	RDM1 pseudogene 3 [Source:HGNC Symbol;Acc:HGNC:53919]	RDM1P3
AMZ2-1	chr17	68246629	68247938	ENSG00000267731	68189884	68192802	+	novel transcript	AC005332.2
AMZ2-1	chr17	68246629	68247938	ENSG00000274561	68131462	68131907	+	novel transcript	AC005332.3
AMZ2-1	chr17	68246629	68247938	ENSG00000274712	68205489	68207493	+
AMZ2-1	chr17	68246629	68247938	ENSG00000277476	68133201	68135935	+	novel transcript	AC005332.5
AMZ2-1	chr17	68246629	68247938	ENSG00000278730	68126666	68129586	+	novel transcript	AC005332.6
AMZ2-1	chr17	68246629	68247938	ENSG00000278740	68188547	68189165	+	novel transcript	AC005332.7
AMZ2-1	chr17	68246629	68247938	ENSG00000279573	67955314	67957291	+	TEC	AC134407.2
AMZ2-1	chr17	68246629	68247938	ENSG00000279880	67973934	67976072	+	TEC	AC134407.3
ANO7-1	chr2	241193061	241207816	ENSG00000006607	241356243	241494841	+
ANO7-1	chr2	241193061	241207816	ENSG00000115677	241227264	241317061	-
ANO7-1	chr2	241193061	241207816	ENSG00000115685	241149576	241183652	+
ANO7-1	chr2	241193061	241207816	ENSG00000115687	241106099	241150264	-
ANO7-1	chr2	241193061	241207816	ENSG00000122085	241072169	241102332	-
ANO7-1	chr2	241193061	241207816	ENSG00000146205	241188509	241225377	+
ANO7-1	chr2	241193061	241207816	ENSG00000162804	240998838	241095568	+
ANO7-1	chr2	241193061	241207816	ENSG00000168385	241315100	241354027	+
ANO7-1	chr2	241193061	241207816	ENSG00000223374	241351340	241353104	-	novel transcript	AC005104.1
ANO7-1	chr2	241193061	241207816	ENSG00000223991	240981515	240986072	-	novel transcript	AC104809.1
ANO7-1	chr2	241193061	241207816	ENSG00000224232	241478316	241478993	+	KCTD5 pseudogene 1 [Source:HGNC Symbol;Acc:HGNC:54736]	KCTD5P1
ANO7-1	chr2	241193061	241207816	ENSG00000225521	241015599	241064116	-	novel transcript	AC005237.1
ANO7-1	chr2	241193061	241207816	ENSG00000226321	240906330	240993311	+	ciliary rootlet coiled-coil, rootletin family member 2 [Source:HGNC Symbol;Acc:HGNC:51677]	CROCC2
ANO7-1	chr2	241193061	241207816	ENSG00000229996	241010045	241010744	-	novel transcript	AC093585.1
ANO7-1	chr2	241193061	241207816	ENSG00000233392	240954617	240967451	-	novel transcript	AC104809.2
ANO7-1	chr2	241193061	241207816	ENSG00000235861	241118725	241118943	+	zinc finger CCCH-type containing 12A (ZC3H12A) pseudogene	AC005237.2
ANO7-1	chr2	241193061	241207816	ENSG00000263752	241477905	241477982	+	microRNA 3133 [Source:HGNC Symbol;Acc:HGNC:38305]	MIR3133
ATIC-1	chr2	215292583	215311878	ENSG00000115414	215360440	215436172	-
ATIC-1	chr2	215292583	215311878	ENSG00000138363	215311817	215349773	+
ATIC-1	chr2	215292583	215311878	ENSG00000225166	215453707	215463871	+
ATIC-1	chr2	215292583	215311878	ENSG00000227769	215004782	215085488	+	novel transcript, antisense to ABCA12	AC072062.1
ATIC-1	chr2	215292583	215311878	ENSG00000227981	215579407	215582635	-	novel transcript	AC012668.1
ATIC-1	chr2	215292583	215311878	ENSG00000228618	215476667	215480248	+	novel transcript	AC012462.2
ATIC-1	chr2	215292583	215311878	ENSG00000230695	215436253	215436992	+	novel transcript	AC012462.3
ATIC-1	chr2	215292583	215311878	ENSG00000234938	215530447	215545526	-	novel transcript	AC012668.2
ATIC-1	chr2	215292583	215311878	ENSG00000237571	215274992	215277947	+	long intergenic non-protein coding RNA 2862 [Source:HGNC Symbol;Acc:HGNC:54419]	LINC02862
ATIC-1	chr2	215301218	215311972	ENSG00000115414	215360440	215436172	-
ATIC-1	chr2	215301218	215311972	ENSG00000138363	215311817	215349773	+
ATIC-1	chr2	215301218	215311972	ENSG00000225166	215453707	215463871	+
ATIC-1	chr2	215301218	215311972	ENSG00000227769	215004782	215085488	+	novel transcript, antisense to ABCA12	AC072062.1
ATIC-1	chr2	215301218	215311972	ENSG00000227981	215579407	215582635	-	novel transcript	AC012668.1
ATIC-1	chr2	215301218	215311972	ENSG00000228618	215476667	215480248	+	novel transcript	AC012462.2
ATIC-1	chr2	215301218	215311972	ENSG00000230695	215436253	215436992	+	novel transcript	AC012462.3
ATIC-1	chr2	215301218	215311972	ENSG00000234938	215530447	215545526	-	novel transcript	AC012668.2
ATIC-1	chr2	215301218	215311972	ENSG00000237571	215274992	215277947	+	long intergenic non-protein coding RNA 2862 [Source:HGNC Symbol;Acc:HGNC:54419]	LINC02862
ATP5L-1	chr11	118397095	118401309	ENSG00000019144	118606440	118658038	+
ATP5L-1	chr11	118397095	118401309	ENSG00000095139	118572390	118603033	+
ATP5L-1	chr11	118397095	118401309	ENSG00000110344	118359585	118399211	+
ATP5L-1	chr11	118397095	118401309	ENSG00000118058	118436490	118526832	+
ATP5L-1	chr11	118397095	118401309	ENSG00000118094	118657316	118679690	-
ATP5L-1	chr11	118397095	118401309	ENSG00000118096	118544528	118572970	-
ATP5L-1	chr11	118397095	118401309	ENSG00000149573	118253403	118264536	-
ATP5L-1	chr11	118397095	118401309	ENSG00000149575	118161951	118176673	-
ATP5L-1	chr11	118397095	118401309	ENSG00000149582	118531041	118547280	+
ATP5L-1	chr11	118397095	118401309	ENSG00000160588	118226690	118252350	-
ATP5L-1	chr11	118397095	118401309	ENSG00000160593	118193740	118225094	-
ATP5L-1	chr11	118397095	118401309	ENSG00000160654	118344344	118355161	+
ATP5L-1	chr11	118397095	118401309	ENSG00000167283	118401154	118431496	+
ATP5L-1	chr11	118397095	118401309	ENSG00000167286	118338954	118342744	-
ATP5L-1	chr11	118397095	118401309	ENSG00000172425	118527472	118531197	+
ATP5L-1	chr11	118397095	118401309	ENSG00000177098	118133377	118152888	-
ATP5L-1	chr11	118397095	118401309	ENSG00000198851	118304545	118316175	+
ATP5L-1	chr11	118397095	118401309	ENSG00000207185	118593988	118594093	+	RNA, U6 small nuclear 1157, pseudogene [Source:HGNC Symbol;Acc:HGNC:48120]	RNU6-1157P
ATP5L-1	chr11	118397095	118401309	ENSG00000243431	118560690	118561580	+	ribosomal protein L5 pseudogene 30 [Source:HGNC Symbol;Acc:HGNC:35837]	RPL5P30
ATP5L-1	chr11	118397095	118401309	ENSG00000254873	118397095	118401895	-	novel transcript, antisense to ATP5L and UBE4A	AP001267.1
ATP5L-1	chr11	118397095	118401309	ENSG00000254992	118322789	118323083	-	carbohydrate (N-acetylglucosamine 6-O) sulfotransferase 5 (CHST5) pseudogene	AP001582.1
ATP5L-1	chr11	118397095	118401309	ENSG00000255163	118208932	118209211	-	heat shock protein family E (Hsp10) member 1 pseudogene 18 [Source:HGNC Symbol;Acc:HGNC:49337]	HSPE1P18
ATP5L-1	chr11	118397095	118401309	ENSG00000255176	118636620	118638097	+	novel transcript	AP000941.1
ATP5L-1	chr11	118397095	118401309	ENSG00000255239	118688039	118690600	-
ATP5L-1	chr11	118397095	118401309	ENSG00000255384	118433121	118435206	-	novel transcript	AP001267.2
ATP5L-1	chr11	118397095	118401309	ENSG00000255435	118511911	118531094	-
ATP5L-1	chr11	118397095	118401309	ENSG00000269944	118415977	118416521	+	novel transcript	AP001267.4
ATP5L-1	chr11	118397095	118401309	ENSG00000280032	118264593	118266817	+	TEC	AP002800.1
ATP5L-1	chr11	118397095	118401309	ENSG00000284246	118644000	118644079	+	microRNA 6716 [Source:HGNC Symbol;Acc:HGNC:50048]	MIR6716
ATP5L-1	chr11	118398906	118401895	ENSG00000019144	118606440	118658038	+
ATP5L-1	chr11	118398906	118401895	ENSG00000095139	118572390	118603033	+
ATP5L-1	chr11	118398906	118401895	ENSG00000110344	118359585	118399211	+
ATP5L-1	chr11	118398906	118401895	ENSG00000118058	118436490	118526832	+
ATP5L-1	chr11	118398906	118401895	ENSG00000118094	118657316	118679690	-
ATP5L-1	chr11	118398906	118401895	ENSG00000118096	118544528	118572970	-
ATP5L-1	chr11	118398906	118401895	ENSG00000149573	118253403	118264536	-
ATP5L-1	chr11	118398906	118401895	ENSG00000149575	118161951	118176673	-
ATP5L-1	chr11	118398906	118401895	ENSG00000149582	118531041	118547280	+
ATP5L-1	chr11	118398906	118401895	ENSG00000160588	118226690	118252350	-
ATP5L-1	chr11	118398906	118401895	ENSG00000160593	118193740	118225094	-
ATP5L-1	chr11	118398906	118401895	ENSG00000160654	118344344	118355161	+
ATP5L-1	chr11	118398906	118401895	ENSG00000167283	118401154	118431496	+
ATP5L-1	chr11	118398906	118401895	ENSG00000167286	118338954	118342744	-
ATP5L-1	chr11	118398906	118401895	ENSG00000172425	118527472	118531197	+
ATP5L-1	chr11	118398906	118401895	ENSG00000177098	118133377	118152888	-
ATP5L-1	chr11	118398906	118401895	ENSG00000198851	118304545	118316175	+
ATP5L-1	chr11	118398906	118401895	ENSG00000207185	118593988	118594093	+	RNA, U6 small nuclear 1157, pseudogene [Source:HGNC Symbol;Acc:HGNC:48120]	RNU6-1157P
ATP5L-1	chr11	118398906	118401895	ENSG00000243431	118560690	118561580	+	ribosomal protein L5 pseudogene 30 [Source:HGNC Symbol;Acc:HGNC:35837]	RPL5P30
ATP5L-1	chr11	118398906	118401895	ENSG00000254873	118397095	118401895	-	novel transcript, antisense to ATP5L and UBE4A	AP001267.1
ATP5L-1	chr11	118398906	118401895	ENSG00000254992	118322789	118323083	-	carbohydrate (N-acetylglucosamine 6-O) sulfotransferase 5 (CHST5) pseudogene	AP001582.1
ATP5L-1	chr11	118398906	118401895	ENSG00000255163	118208932	118209211	-	heat shock protein family E (Hsp10) member 1 pseudogene 18 [Source:HGNC Symbol;Acc:HGNC:49337]	HSPE1P18
ATP5L-1	chr11	118398906	118401895	ENSG00000255176	118636620	118638097	+	novel transcript	AP000941.1
ATP5L-1	chr11	118398906	118401895	ENSG00000255239	118688039	118690600	-
ATP5L-1	chr11	118398906	118401895	ENSG00000255384	118433121	118435206	-	novel transcript	AP001267.2
ATP5L-1	chr11	118398906	118401895	ENSG00000255435	118511911	118531094	-
ATP5L-1	chr11	118398906	118401895	ENSG00000269944	118415977	118416521	+	novel transcript	AP001267.4
ATP5L-1	chr11	118398906	118401895	ENSG00000280032	118264593	118266817	+	TEC	AP002800.1
ATP5L-1	chr11	118398906	118401895	ENSG00000284246	118644000	118644079	+	microRNA 6716 [Source:HGNC Symbol;Acc:HGNC:50048]	MIR6716
BASP1-2	chr5	17130028	17217047	ENSG00000176788	17065598	17276843	+
BASP1-2	chr5	17130028	17217047	ENSG00000185296	17306381	17306960	+	aurora kinase A interacting protein 1 (AURKAIP1) pseudogene	AC026785.1
BASP1-2	chr5	17130028	17217047	ENSG00000201436	16941843	16941951	-	RNA, U6 small nuclear 660, pseudogene [Source:HGNC Symbol;Acc:HGNC:47623]	RNU6-660P
BASP1-2	chr5	17130028	17217047	ENSG00000201715	17345616	17345955	+	RN7SK pseudogene 133 [Source:HGNC Symbol;Acc:HGNC:45857]	RN7SKP133
BASP1-2	chr5	17130028	17217047	ENSG00000206814	17117576	17117686	-	Y RNA [Source:RFAM;Acc:RF00019]	Y_RNA
BASP1-2	chr5	17130028	17217047	ENSG00000215196	17130028	17217047	-
BASP1-2	chr5	17130028	17217047	ENSG00000223361	17353695	17354624	-	ferritin heavy chain 1 pseudogene 10 [Source:HGNC Symbol;Acc:HGNC:3980]	FTH1P10
BASP1-2	chr5	17130028	17217047	ENSG00000243538	16902294	16902641	-	ribosomal protein S26 pseudogene 28 [Source:HGNC Symbol;Acc:HGNC:36149]	RPS26P28
BASP1-2	chr5	17130028	17217047	ENSG00000248205	17502043	17502363	-	H3 histone pseudogene 17 [Source:HGNC Symbol;Acc:HGNC:54451]	H3P17
BASP1-2	chr5	17130028	17217047	ENSG00000248223	17353910	17354899	+	novel transcript	AC026785.2
BASP1-2	chr5	17130028	17217047	ENSG00000248455	17404019	17441694	+
BASP1-2	chr5	17130028	17217047	ENSG00000249199	17369225	17375577	-
BASP1-2	chr5	17130028	17217047	ENSG00000249620	17511833	17512238	-	H3 histone pseudogene 18 [Source:HGNC Symbol;Acc:HGNC:54452]	H3P18
BASP1-2	chr5	17130028	17217047	ENSG00000249662	17444010	17483946	+
BASP1-2	chr5	17130028	17217047	ENSG00000250667	17495658	17495826	-	TAF11-like protein pseudogene	AC106774.1
BASP1-2	chr5	17130028	17217047	ENSG00000250816	17202274	17203145	+	DDB1 and CUL4 associated factor 13 pseudogene 2 [Source:HGNC Symbol;Acc:HGNC:43867]	DCAF13P2
BASP1-2	chr5	17130028	17217047	ENSG00000250822	17378906	17387310	-	long intergenic non-protein coding RNA 2111 [Source:HGNC Symbol;Acc:HGNC:52966]	LINC02111
BASP1-2	chr5	17130028	17217047	ENSG00000251990	17156971	17157071	-	RNA, 5S ribosomal pseudogene 180 [Source:HGNC Symbol;Acc:HGNC:43080]	RNA5SP180
BASP1-2	chr5	17130028	17217047	ENSG00000252908	17240611	17240715	+	RNA, U6 small nuclear 1003, pseudogene [Source:HGNC Symbol;Acc:HGNC:47966]	RNU6-1003P
BASP1-2	chr5	17130028	17217047	ENSG00000253093	16853994	16854114	+	RNA, 5S ribosomal pseudogene 179 [Source:HGNC Symbol;Acc:HGNC:43079]	RNA5SP179
BASP1-2	chr5	17130028	17217047	ENSG00000268799	17491361	17491769	-
BASP1-2	chr5	17130028	17217047	ENSG00000271892	17107360	17107789	-	novel transcript	AC026790.1
BASP1-2	chr5	17130028	17217047	ENSG00000284373	17498231	17498827	+	TATA-box binding protein associated factor 11 like 2 [Source:HGNC Symbol;Acc:HGNC:53845]	TAF11L2
BASP1-2	chr5	17130028	17217047	ENSG00000284552	17486231	17486829	+
C2CD2-1	chr21	41885095	41885851	ENSG00000141956	41798225	41879482	-
C2CD2-1	chr21	41885095	41885851	ENSG00000157617	41885112	41953890	-
C2CD2-1	chr21	41885095	41885851	ENSG00000173276	41986831	42010387	-
C2CD2-1	chr21	41885095	41885851	ENSG00000177398	42062959	42143453	+	uromodulin like 1 [Source:HGNC Symbol;Acc:HGNC:12560]	UMODL1
C2CD2-1	chr21	41885095	41885851	ENSG00000183421	41739369	41767106	-
C2CD2-1	chr21	41885095	41885851	ENSG00000184385	42102134	42108534	-	UMODL1 antisense RNA 1 [Source:HGNC Symbol;Acc:HGNC:23821]	UMODL1-AS1
C2CD2-1	chr21	41885095	41885851	ENSG00000227698	41874756	41877613	-	novel transcript	AP001619.1
C2CD2-1	chr21	41885095	41885851	ENSG00000227702	41679181	41697336	+	long intergenic non-protein coding RNA 111 [Source:HGNC Symbol;Acc:HGNC:1262]	LINC00111
C2CD2-1	chr21	41885095	41885851	ENSG00000232401	41716436	41717580	+
C2CD2-1	chr21	41885095	41885851	ENSG00000236384	41711520	41715775	-	long intergenic non-protein coding RNA 479 [Source:HGNC Symbol;Acc:HGNC:19727]	LINC00479
C2CD2-1	chr21	41885095	41885851	ENSG00000236545	41870633	41872054	+	novel transcript	AP001619.2
C2CD2-1	chr21	41885095	41885851	ENSG00000236883	41739373	41741308	+	novel transcript	AP001615.1
C2CD2-1	chr21	41885095	41885851	ENSG00000237232	42009194	42024924	+
C2CD2-1	chr21	41885095	41885851	ENSG00000251778	41882205	41882300	+		AP001619.3
C2CD2-1	chr21	41885095	41885851	ENSG00000275166	41746772	41746841	-	microRNA 6814 [Source:HGNC Symbol;Acc:HGNC:50145]	MIR6814
C7orf50-1	chr7	1127018	1132484	ENSG00000073067	983199	989640	+
C7orf50-1	chr7	1127018	1132484	ENSG00000105963	897901	955407	-
C7orf50-1	chr7	1127018	1132484	ENSG00000146540	996986	1138260	-
C7orf50-1	chr7	1127018	1132484	ENSG00000164849	1044576	1059261	+
C7orf50-1	chr7	1127018	1132484	ENSG00000164850	1082208	1093815	+
C7orf50-1	chr7	1127018	1132484	ENSG00000164853	1232907	1237318	+
C7orf50-1	chr7	1127018	1132484	ENSG00000178381	1152071	1160759	-
C7orf50-1	chr7	1127018	1132484	ENSG00000199023	1022933	1023026	-	microRNA 339 [Source:HGNC Symbol;Acc:HGNC:31776]	MIR339
C7orf50-1	chr7	1127018	1132484	ENSG00000224079	1074450	1078036	+	novel transcript	AC091729.1
C7orf50-1	chr7	1127018	1132484	ENSG00000225146	1029025	1043891	+	novel transcript	AC073957.1
C7orf50-1	chr7	1127018	1132484	ENSG00000226291	1080863	1082178	+	novel transcript	AC091729.2
C7orf50-1	chr7	1127018	1132484	ENSG00000229043	1160374	1165267	+
C7orf50-1	chr7	1127018	1132484	ENSG00000233082	1267353	1269267	+	novel transcript	AC073094.1
C7orf50-1	chr7	1127018	1132484	ENSG00000239857	876552	896436	+
C7orf50-1	chr7	1127018	1132484	ENSG00000240230	898778	975599	-
C7orf50-1	chr7	1127018	1132484	ENSG00000257607	1055360	1059261	-	novel transcript, antisense to GPR146	AC073957.2
C7orf50-1	chr7	1127018	1132484	ENSG00000273151	879790	886547	-	novel transcript, antisense to GET4	AC073957.3
CBFA2T3-1	chr16	88881038	88883919	ENSG00000051523	88643283	88651152	-
CBFA2T3-1	chr16	88881038	88883919	ENSG00000103335	88715343	88785211	-
CBFA2T3-1	chr16	88881038	88883919	ENSG00000124391	88638591	88640473	+
CBFA2T3-1	chr16	88881038	88883919	ENSG00000129993	88874858	88977204	-
CBFA2T3-1	chr16	88881038	88883919	ENSG00000141012	88813734	88856970	-
CBFA2T3-1	chr16	88881038	88883919	ENSG00000158717	88696495	88706421	-
CBFA2T3-1	chr16	88881038	88883919	ENSG00000167508	88651935	88663161	-
CBFA2T3-1	chr16	88881038	88883919	ENSG00000167513	88803213	88809258	+
CBFA2T3-1	chr16	88881038	88883919	ENSG00000167515	88856220	88862686	+	trafficking protein particle complex 2 like [Source:HGNC Symbol;Acc:HGNC:30887]	TRAPPC2L
CBFA2T3-1	chr16	88881038	88883919	ENSG00000174177	88706463	88715386	+
CBFA2T3-1	chr16	88881038	88883919	ENSG00000176715	89088375	89155846	+
CBFA2T3-1	chr16	88881038	88883919	ENSG00000180422	89159146	89164245	+	long intergenic non-protein coding RNA 304 [Source:HGNC Symbol;Acc:HGNC:26713]	LINC00304
CBFA2T3-1	chr16	88881038	88883919	ENSG00000182376	88742767	88745748	+	novel transcript, antisense to FAM38A	AC138028.1
CBFA2T3-1	chr16	88881038	88883919	ENSG00000185669	88677682	88686493	-
CBFA2T3-1	chr16	88881038	88883919	ENSG00000198931	88809339	88811944	-
CBFA2T3-1	chr16	88881038	88883919	ENSG00000205015	89166383	89169147	+	long intergenic non-protein coding RNA 2138 [Source:HGNC Symbol;Acc:HGNC:52998]	LINC02138
CBFA2T3-1	chr16	88881038	88883919	ENSG00000205018	88939789	88951524	+	uncharacterized LOC100129697 [Source:NCBI gene (formerly Entrezgene);Acc:100129697]	AC092384.1
CBFA2T3-1	chr16	88881038	88883919	ENSG00000205022	88863333	88866660	-	PABPN1 like, cytoplasmic [Source:HGNC Symbol;Acc:HGNC:37237]	PABPN1L
CBFA2T3-1	chr16	88881038	88883919	ENSG00000224888	88731180	88741425	+	novel transcript, antisense to FAM38A	AC138028.2
CBFA2T3-1	chr16	88881038	88883919	ENSG00000256982	89046172	89052965	-
CBFA2T3-1	chr16	88881038	88883919	ENSG00000259813	88696501	88698610	+	novel transcript, antisense to RNF166	AC138028.3
CBFA2T3-1	chr16	88881038	88883919	ENSG00000259881	88881038	88887136	+	novel transcript, antisense to CBFA2T3	AC092384.2
CBFA2T3-1	chr16	88881038	88883919	ENSG00000259989	88984032	88995369	+	novel transcript	AC135782.2
CBFA2T3-1	chr16	88881038	88883919	ENSG00000260121	88718615	88720459	+	novel transcript, antisense to FAM38A	AC138028.4
CBFA2T3-1	chr16	88881038	88883919	ENSG00000260617	88741631	88742367	+	novel transcript, antisense to FAM38A	AC138028.5
CBFA2T3-1	chr16	88881038	88883919	ENSG00000260630	88663298	88687186	+
CBFA2T3-1	chr16	88881038	88883919	ENSG00000261226	88936779	88939651	-	novel transcript	AC092384.3
CBFA2T3-1	chr16	88881038	88883919	ENSG00000261546	89113175	89115279	-	novel transcript, antisense to ACSF3	AC135782.3
CBFA2T3-1	chr16	88881038	88883919	ENSG00000278341	88708956	88710437	-	novel transcript, antisense to CTU2	AC138028.6
CBFA2T3-1	chr16	88881038	88883919	ENSG00000284585	88716278	88716337	-	microRNA 4722 [Source:HGNC Symbol;Acc:HGNC:41782]	MIR4722
CBFA2T3-1	chr16	88881257	88883715	ENSG00000051523	88643283	88651152	-
CBFA2T3-1	chr16	88881257	88883715	ENSG00000103335	88715343	88785211	-
CBFA2T3-1	chr16	88881257	88883715	ENSG00000124391	88638591	88640473	+
CBFA2T3-1	chr16	88881257	88883715	ENSG00000129993	88874858	88977204	-
CBFA2T3-1	chr16	88881257	88883715	ENSG00000141012	88813734	88856970	-
CBFA2T3-1	chr16	88881257	88883715	ENSG00000158717	88696495	88706421	-
CBFA2T3-1	chr16	88881257	88883715	ENSG00000167508	88651935	88663161	-
CBFA2T3-1	chr16	88881257	88883715	ENSG00000167513	88803213	88809258	+
CBFA2T3-1	chr16	88881257	88883715	ENSG00000167515	88856220	88862686	+	trafficking protein particle complex 2 like [Source:HGNC Symbol;Acc:HGNC:30887]	TRAPPC2L
CBFA2T3-1	chr16	88881257	88883715	ENSG00000174177	88706463	88715386	+
CBFA2T3-1	chr16	88881257	88883715	ENSG00000176715	89088375	89155846	+
CBFA2T3-1	chr16	88881257	88883715	ENSG00000180422	89159146	89164245	+	long intergenic non-protein coding RNA 304 [Source:HGNC Symbol;Acc:HGNC:26713]	LINC00304
CBFA2T3-1	chr16	88881257	88883715	ENSG00000182376	88742767	88745748	+	novel transcript, antisense to FAM38A	AC138028.1
CBFA2T3-1	chr16	88881257	88883715	ENSG00000185669	88677682	88686493	-
CBFA2T3-1	chr16	88881257	88883715	ENSG00000198931	88809339	88811944	-
CBFA2T3-1	chr16	88881257	88883715	ENSG00000205015	89166383	89169147	+	long intergenic non-protein coding RNA 2138 [Source:HGNC Symbol;Acc:HGNC:52998]	LINC02138
CBFA2T3-1	chr16	88881257	88883715	ENSG00000205018	88939789	88951524	+	uncharacterized LOC100129697 [Source:NCBI gene (formerly Entrezgene);Acc:100129697]	AC092384.1
CBFA2T3-1	chr16	88881257	88883715	ENSG00000205022	88863333	88866660	-	PABPN1 like, cytoplasmic [Source:HGNC Symbol;Acc:HGNC:37237]	PABPN1L
CBFA2T3-1	chr16	88881257	88883715	ENSG00000224888	88731180	88741425	+	novel transcript, antisense to FAM38A	AC138028.2
CBFA2T3-1	chr16	88881257	88883715	ENSG00000256982	89046172	89052965	-
CBFA2T3-1	chr16	88881257	88883715	ENSG00000259813	88696501	88698610	+	novel transcript, antisense to RNF166	AC138028.3
CBFA2T3-1	chr16	88881257	88883715	ENSG00000259881	88881038	88887136	+	novel transcript, antisense to CBFA2T3	AC092384.2
CBFA2T3-1	chr16	88881257	88883715	ENSG00000259989	88984032	88995369	+	novel transcript	AC135782.2
CBFA2T3-1	chr16	88881257	88883715	ENSG00000260121	88718615	88720459	+	novel transcript, antisense to FAM38A	AC138028.4
CBFA2T3-1	chr16	88881257	88883715	ENSG00000260617	88741631	88742367	+	novel transcript, antisense to FAM38A	AC138028.5
CBFA2T3-1	chr16	88881257	88883715	ENSG00000260630	88663298	88687186	+
CBFA2T3-1	chr16	88881257	88883715	ENSG00000261226	88936779	88939651	-	novel transcript	AC092384.3
CBFA2T3-1	chr16	88881257	88883715	ENSG00000261546	89113175	89115279	-	novel transcript, antisense to ACSF3	AC135782.3
CBFA2T3-1	chr16	88881257	88883715	ENSG00000278341	88708956	88710437	-	novel transcript, antisense to CTU2	AC138028.6
CBFA2T3-1	chr16	88881257	88883715	ENSG00000284585	88716278	88716337	-	microRNA 4722 [Source:HGNC Symbol;Acc:HGNC:41782]	MIR4722
CBFA2T3-1	chr16	88881455	88887136	ENSG00000051523	88643283	88651152	-
CBFA2T3-1	chr16	88881455	88887136	ENSG00000103335	88715343	88785211	-
CBFA2T3-1	chr16	88881455	88887136	ENSG00000124391	88638591	88640473	+
CBFA2T3-1	chr16	88881455	88887136	ENSG00000129993	88874858	88977204	-
CBFA2T3-1	chr16	88881455	88887136	ENSG00000141012	88813734	88856970	-
CBFA2T3-1	chr16	88881455	88887136	ENSG00000158717	88696495	88706421	-
CBFA2T3-1	chr16	88881455	88887136	ENSG00000167508	88651935	88663161	-
CBFA2T3-1	chr16	88881455	88887136	ENSG00000167513	88803213	88809258	+
CBFA2T3-1	chr16	88881455	88887136	ENSG00000167515	88856220	88862686	+	trafficking protein particle complex 2 like [Source:HGNC Symbol;Acc:HGNC:30887]	TRAPPC2L
CBFA2T3-1	chr16	88881455	88887136	ENSG00000174177	88706463	88715386	+
CBFA2T3-1	chr16	88881455	88887136	ENSG00000176715	89088375	89155846	+
CBFA2T3-1	chr16	88881455	88887136	ENSG00000180422	89159146	89164245	+	long intergenic non-protein coding RNA 304 [Source:HGNC Symbol;Acc:HGNC:26713]	LINC00304
CBFA2T3-1	chr16	88881455	88887136	ENSG00000182376	88742767	88745748	+	novel transcript, antisense to FAM38A	AC138028.1
CBFA2T3-1	chr16	88881455	88887136	ENSG00000185669	88677682	88686493	-
CBFA2T3-1	chr16	88881455	88887136	ENSG00000198931	88809339	88811944	-
CBFA2T3-1	chr16	88881455	88887136	ENSG00000205015	89166383	89169147	+	long intergenic non-protein coding RNA 2138 [Source:HGNC Symbol;Acc:HGNC:52998]	LINC02138
CBFA2T3-1	chr16	88881455	88887136	ENSG00000205018	88939789	88951524	+	uncharacterized LOC100129697 [Source:NCBI gene (formerly Entrezgene);Acc:100129697]	AC092384.1
CBFA2T3-1	chr16	88881455	88887136	ENSG00000205022	88863333	88866660	-	PABPN1 like, cytoplasmic [Source:HGNC Symbol;Acc:HGNC:37237]	PABPN1L
CBFA2T3-1	chr16	88881455	88887136	ENSG00000224888	88731180	88741425	+	novel transcript, antisense to FAM38A	AC138028.2
CBFA2T3-1	chr16	88881455	88887136	ENSG00000256982	89046172	89052965	-
CBFA2T3-1	chr16	88881455	88887136	ENSG00000259813	88696501	88698610	+	novel transcript, antisense to RNF166	AC138028.3
CBFA2T3-1	chr16	88881455	88887136	ENSG00000259881	88881038	88887136	+	novel transcript, antisense to CBFA2T3	AC092384.2
CBFA2T3-1	chr16	88881455	88887136	ENSG00000259989	88984032	88995369	+	novel transcript	AC135782.2
CBFA2T3-1	chr16	88881455	88887136	ENSG00000260121	88718615	88720459	+	novel transcript, antisense to FAM38A	AC138028.4
CBFA2T3-1	chr16	88881455	88887136	ENSG00000260617	88741631	88742367	+	novel transcript, antisense to FAM38A	AC138028.5
CBFA2T3-1	chr16	88881455	88887136	ENSG00000260630	88663298	88687186	+
CBFA2T3-1	chr16	88881455	88887136	ENSG00000261226	88936779	88939651	-	novel transcript	AC092384.3
CBFA2T3-1	chr16	88881455	88887136	ENSG00000261546	89113175	89115279	-	novel transcript, antisense to ACSF3	AC135782.3
CBFA2T3-1	chr16	88881455	88887136	ENSG00000278341	88708956	88710437	-	novel transcript, antisense to CTU2	AC138028.6
CBFA2T3-1	chr16	88881455	88887136	ENSG00000284585	88716278	88716337	-	microRNA 4722 [Source:HGNC Symbol;Acc:HGNC:41782]	MIR4722
CCM2L-1	chr20	32027753	32031575	ENSG00000088325	31739271	31801805	+
CCM2L-1	chr20	32027753	32031575	ENSG00000088356	31944342	31952092	-
CCM2L-1	chr20	32027753	32031575	ENSG00000101306	31819308	31834689	+
CCM2L-1	chr20	32027753	32031575	ENSG00000101331	32010450	32032180	+
CCM2L-1	chr20	32027753	32031575	ENSG00000101336	32052188	32101856	+
CCM2L-1	chr20	32027753	32031575	ENSG00000101337	32109506	32167258	+
CCM2L-1	chr20	32027753	32031575	ENSG00000101346	32207880	32238667	+
CCM2L-1	chr20	32027753	32031575	ENSG00000126003	32192503	32207791	-
CCM2L-1	chr20	32027753	32031575	ENSG00000131044	31870702	31944963	+
CCM2L-1	chr20	32027753	32031575	ENSG00000149599	31847637	31870747	-	dual specificity phosphatase 15 [Source:HGNC Symbol;Acc:HGNC:16236]	DUSP15
CCM2L-1	chr20	32027753	32031575	ENSG00000179772	31844301	31845619	-
CCM2L-1	chr20	32027753	32031575	ENSG00000199497	31901254	31901426	+	RNA, U1 small nuclear 94, pseudogene [Source:HGNC Symbol;Acc:HGNC:48436]	RNU1-94P
CCM2L-1	chr20	32027753	32031575	ENSG00000212571	32050588	32050705	+	RNA, 5S ribosomal pseudogene 482 [Source:HGNC Symbol;Acc:HGNC:43382]	RNA5SP482
CCM2L-1	chr20	32027753	32031575	ENSG00000224452	32170390	32170790	-	ribosomal L24 domain containing 1 pseudogene 6 [Source:HGNC Symbol;Acc:HGNC:37876]	RSL24D1P6
CCM2L-1	chr20	32027753	32031575	ENSG00000226239	32027753	32031575	-
CCM2L-1	chr20	32027753	32031575	ENSG00000230801	31808503	31808749	-	ATP synthase, H+ transporting, mitochondrial F0 complex subunit f isoform 2 (ATP5J2) pseudogene	AL160175.1
CCM2L-1	chr20	32027753	32031575	ENSG00000235217	32186477	32190527	-	testis specific protein Y-linked 26, pseudogene [Source:HGNC Symbol;Acc:HGNC:16256]	TSPY26P
CCM2L-1	chr20	32027753	32031575	ENSG00000252623	32008351	32008472	+	RNA, 5S ribosomal pseudogene 481 [Source:HGNC Symbol;Acc:HGNC:43381]	RNA5SP481
CCM2L-1	chr20	32027753	32031575	ENSG00000260903	31968002	32003387	+
CCM2L-1	chr20	32027753	32031575	ENSG00000275576	32116171	32116629	+	novel transcript, sense intronic to TM9SF4	AL049539.1
CCM2L-1	chr20	32027753	32031575	ENSG00000278012	31970181	31970831	+	novel transcript, sense intronic to XKR7	AL031658.2
CCM2L-1	chr20	32027753	32031575	ENSG00000284125	32237795	32237847	+	microRNA 1825 [Source:HGNC Symbol;Acc:HGNC:35389]	MIR1825
CEP41-1	chr7	130394096	130395605	ENSG00000091704	130380339	130388114	+
CEP41-1	chr7	130394096	130395605	ENSG00000106477	130393771	130442433	-
CEP41-1	chr7	130394096	130395605	ENSG00000106484	130486171	130506296	+
CEP41-1	chr7	130394096	130395605	ENSG00000128510	130293134	130324180	+
CEP41-1	chr7	130394096	130395605	ENSG00000146842	130164715	130207770	-
CEP41-1	chr7	130394096	130395605	ENSG00000158516	130266827	130289798	+
CEP41-1	chr7	130394096	130395605	ENSG00000158525	130344816	130368730	+	carboxypeptidase A5 [Source:HGNC Symbol;Acc:HGNC:15722]	CPA5
CEP41-1	chr7	130394096	130395605	ENSG00000158623	130506238	130668748	-	COPI coat complex subunit gamma 2 [Source:HGNC Symbol;Acc:HGNC:2237]	COPG2
CEP41-1	chr7	130394096	130395605	ENSG00000165120	130207860	130216843	+
CEP41-1	chr7	130394096	130395605	ENSG00000199043	130496111	130496204	+	microRNA 335 [Source:HGNC Symbol;Acc:HGNC:31773]	MIR335
CEP41-1	chr7	130394096	130395605	ENSG00000213265	130668648	130687432	-
CEP41-1	chr7	130394096	130395605	ENSG00000226045	130645225	130645594	-	glutamyl-tRNA(Gln) amidotransferase, subunit C homolog (bacterial)(GATC) pseudogene	AC234644.1
CEP41-1	chr7	130394096	130395605	ENSG00000229196	130141731	130142615	+
CEP41-1	chr7	130394096	130395605	ENSG00000239021	130602795	130602913	-	RNA, 5S ribosomal pseudogene 246 [Source:HGNC Symbol;Acc:HGNC:43146]	RNA5SP246
CEP41-1	chr7	130394096	130395605	ENSG00000240571	130173718	130205361	+	novel transcript	AC087071.2
CEP41-1	chr7	130394096	130395605	ENSG00000259920	130481491	130484392	-	novel transcript	AC007938.1
CEP41-1	chr7	130394096	130395605	ENSG00000270823	130495794	130498427	-	novel transcript, antisense to MEST	AC007938.2
CEP41-1	chr7	130394096	130395605	ENSG00000270953	130507660	130508282	+	novel transcript, antisense to COPG2	AC007938.3
CEP41-1	chr7	130394096	130395605	ENSG00000270992	130255902	130262770	+	ribosomal protein L29, pseudogene	AC024085.1
CEP41-1	chr7	130394096	130395605	ENSG00000272701	130486042	130491033	-
CEP41-1	chr7	130394096	130395605	ENSG00000274500	130489868	130489966	+		AC007938.4
CEP41-1	chr7	130394096	130395605	ENSG00000277269	130487483	130487622	+		AC007938.5
CEP41-1	chr7	130394096	130395605	ENSG00000278055	130488304	130488538	+		AC007938.6
CHMP1B-2	chr18	11813149	11860066	ENSG00000141401	11981025	12030883	+
CHMP1B-2	chr18	11813149	11860066	ENSG00000141404	11688956	11885685	+
CHMP1B-2	chr18	11813149	11860066	ENSG00000154889	11882622	11909223	-
CHMP1B-2	chr18	11813149	11860066	ENSG00000181626	12093853	12129749	+
CHMP1B-2	chr18	11813149	11860066	ENSG00000200827	12098427	12098532	+	RNA, U6 small nuclear 324, pseudogene [Source:HGNC Symbol;Acc:HGNC:47287]	RNU6-324P
CHMP1B-2	chr18	11813149	11860066	ENSG00000212712	12056676	12057822	-	kinesin family member 1C (KIF1C) pseudogene	AP002414.1
CHMP1B-2	chr18	11813149	11860066	ENSG00000236396	11609596	11610612	+	solute carrier family 35 member G4 [Source:HGNC Symbol;Acc:HGNC:31043]	SLC35G4
CHMP1B-2	chr18	11813149	11860066	ENSG00000255112	11851396	11854449	+
CHMP1B-2	chr18	11813149	11860066	ENSG00000256616	12073232	12076654	-	G protein-coupled receptor 125 (GPR125) pseudogene	AP002414.2
CHMP1B-2	chr18	11813149	11860066	ENSG00000257513	11619509	11639699	-	nuclear pore complex interacting protein family member B1, pseudogene [Source:HGNC Symbol;Acc:HGNC:37452]	NPIPB1P
CHMP1B-2	chr18	11813149	11860066	ENSG00000260759	11666456	11670165	-	novel transcript	AP001120.1
CHMP1B-2	chr18	11813149	11860066	ENSG00000266955	11993988	11994938	-	novel transcript, antisense IMPA2	AP001269.1
CHMP1B-2	chr18	11813149	11860066	ENSG00000266995	12040101	12040300	-	telomeric repeat binding factor (NIMA-interacting) 1 (TERF1) pseudogene	AP001542.1
CHMP1B-2	chr18	11813149	11860066	ENSG00000267079	11910634	11914344	-	novel transcript	AP001269.2
CHMP1B-2	chr18	11813149	11860066	ENSG00000267143	11620717	11621158	-	novel transcript	AP001120.2
CHMP1B-2	chr18	11813149	11860066	ENSG00000267162	12101997	12102470	-	succinate dehydrogenase complex subunit D pseudogene 1 [Source:HGNC Symbol;Acc:HGNC:10684]	SDHDP1
CHMP1B-2	chr18	11813149	11860066	ENSG00000267165	11851414	11852751	-	CHMP1B antisense RNA 1 [Source:HGNC Symbol;Acc:HGNC:52778]	CHMP1B-AS1
CHMP1B-2	chr18	11813149	11860066	ENSG00000267292	12050309	12050672	-	WD repeat domain, phosphoinositide interacting 2 (WIPI2) pseudogene	AP001542.2
CHMP1B-2	chr18	11813149	11860066	ENSG00000267333	11745626	11747581	+	asparagine synthetase pseudogene 6 [Source:HGNC Symbol;Acc:HGNC:49876]	ASNSP6
CHMP1B-2	chr18	11813149	11860066	ENSG00000267371	11552366	11552847	+	nuclear factor of kappa light polypeptide gene enhancer in B-cells 2 (p49/p100) (NFKB2) pseudogene	AP001017.1
CHMP1B-2	chr18	11813149	11860066	ENSG00000267455	11810406	11811484	-	novel transcript, antisense GNAL	AP005137.1
CHMP1B-2	chr18	11813149	11860066	ENSG00000267478	12091674	12093141	-	nuclear factor of kappa light polypeptide gene enhancer in B-cells 2 (p49/p100) (NFKB2) pseudogene	AP002414.3
CHMP1B-2	chr18	11813149	11860066	ENSG00000267480	12031178	12032181	-	novel transcript, antisense IMPA2	AP001542.3
CHMP1B-2	chr18	11813149	11860066	ENSG00000267533	12067173	12068417	-	single stranded DNA binding protein 4 (SSBP4) pseudogene	AP002414.4
CHMP1B-2	chr18	11813149	11860066	ENSG00000267661	11928838	11929476	+	ribosomal protein S20 (RPS20) pseudogene	AP001269.3
CHMP1B-2	chr18	11813149	11860066	ENSG00000267722	12081540	12085267	+	novel transcript	AP002414.5
CHMP1B-2	chr18	11813149	11860066	ENSG00000267773	11644336	11644824	+	solute carrier family 35, member G4 (SLC35G4) pseudogene	AP001120.3
CHMP1B-2	chr18	11813149	11860066	ENSG00000267794	11618208	11618315	+	phospholipase A2, group X (PLA2G10) pseudogene	AP001120.4
CHMP1B-2	chr18	11813149	11860066	ENSG00000272703	11857155	11857554	-	novel transcript	AP005137.2
CHMP1B-2	chr18	11813149	11860066	ENSG00000273141	11908712	11909223	+	novel transcript, antisense to MPPE1	AP001269.4
CHMP1B-2	chr18	11813149	11860066	ENSG00000283492	11654885	11654941	-	microRNA 7153 [Source:HGNC Symbol;Acc:HGNC:50190]	MIR7153
CHMP1B-2	chr18	11819430	11860066	ENSG00000141401	11981025	12030883	+
CHMP1B-2	chr18	11819430	11860066	ENSG00000141404	11688956	11885685	+
CHMP1B-2	chr18	11819430	11860066	ENSG00000154889	11882622	11909223	-
CHMP1B-2	chr18	11819430	11860066	ENSG00000181626	12093853	12129749	+
CHMP1B-2	chr18	11819430	11860066	ENSG00000200827	12098427	12098532	+	RNA, U6 small nuclear 324, pseudogene [Source:HGNC Symbol;Acc:HGNC:47287]	RNU6-324P
CHMP1B-2	chr18	11819430	11860066	ENSG00000212712	12056676	12057822	-	kinesin family member 1C (KIF1C) pseudogene	AP002414.1
CHMP1B-2	chr18	11819430	11860066	ENSG00000236396	11609596	11610612	+	solute carrier family 35 member G4 [Source:HGNC Symbol;Acc:HGNC:31043]	SLC35G4
CHMP1B-2	chr18	11819430	11860066	ENSG00000255112	11851396	11854449	+
CHMP1B-2	chr18	11819430	11860066	ENSG00000256616	12073232	12076654	-	G protein-coupled receptor 125 (GPR125) pseudogene	AP002414.2
CHMP1B-2	chr18	11819430	11860066	ENSG00000257513	11619509	11639699	-	nuclear pore complex interacting protein family member B1, pseudogene [Source:HGNC Symbol;Acc:HGNC:37452]	NPIPB1P
CHMP1B-2	chr18	11819430	11860066	ENSG00000260759	11666456	11670165	-	novel transcript	AP001120.1
CHMP1B-2	chr18	11819430	11860066	ENSG00000266955	11993988	11994938	-	novel transcript, antisense IMPA2	AP001269.1
CHMP1B-2	chr18	11819430	11860066	ENSG00000266995	12040101	12040300	-	telomeric repeat binding factor (NIMA-interacting) 1 (TERF1) pseudogene	AP001542.1
CHMP1B-2	chr18	11819430	11860066	ENSG00000267079	11910634	11914344	-	novel transcript	AP001269.2
CHMP1B-2	chr18	11819430	11860066	ENSG00000267143	11620717	11621158	-	novel transcript	AP001120.2
CHMP1B-2	chr18	11819430	11860066	ENSG00000267162	12101997	12102470	-	succinate dehydrogenase complex subunit D pseudogene 1 [Source:HGNC Symbol;Acc:HGNC:10684]	SDHDP1
CHMP1B-2	chr18	11819430	11860066	ENSG00000267165	11851414	11852751	-	CHMP1B antisense RNA 1 [Source:HGNC Symbol;Acc:HGNC:52778]	CHMP1B-AS1
CHMP1B-2	chr18	11819430	11860066	ENSG00000267292	12050309	12050672	-	WD repeat domain, phosphoinositide interacting 2 (WIPI2) pseudogene	AP001542.2
CHMP1B-2	chr18	11819430	11860066	ENSG00000267333	11745626	11747581	+	asparagine synthetase pseudogene 6 [Source:HGNC Symbol;Acc:HGNC:49876]	ASNSP6
CHMP1B-2	chr18	11819430	11860066	ENSG00000267371	11552366	11552847	+	nuclear factor of kappa light polypeptide gene enhancer in B-cells 2 (p49/p100) (NFKB2) pseudogene	AP001017.1
CHMP1B-2	chr18	11819430	11860066	ENSG00000267455	11810406	11811484	-	novel transcript, antisense GNAL	AP005137.1
CHMP1B-2	chr18	11819430	11860066	ENSG00000267478	12091674	12093141	-	nuclear factor of kappa light polypeptide gene enhancer in B-cells 2 (p49/p100) (NFKB2) pseudogene	AP002414.3
CHMP1B-2	chr18	11819430	11860066	ENSG00000267480	12031178	12032181	-	novel transcript, antisense IMPA2	AP001542.3
CHMP1B-2	chr18	11819430	11860066	ENSG00000267533	12067173	12068417	-	single stranded DNA binding protein 4 (SSBP4) pseudogene	AP002414.4
CHMP1B-2	chr18	11819430	11860066	ENSG00000267661	11928838	11929476	+	ribosomal protein S20 (RPS20) pseudogene	AP001269.3
CHMP1B-2	chr18	11819430	11860066	ENSG00000267722	12081540	12085267	+	novel transcript	AP002414.5
CHMP1B-2	chr18	11819430	11860066	ENSG00000267773	11644336	11644824	+	solute carrier family 35, member G4 (SLC35G4) pseudogene	AP001120.3
CHMP1B-2	chr18	11819430	11860066	ENSG00000267794	11618208	11618315	+	phospholipase A2, group X (PLA2G10) pseudogene	AP001120.4
CHMP1B-2	chr18	11819430	11860066	ENSG00000272703	11857155	11857554	-	novel transcript	AP005137.2
CHMP1B-2	chr18	11819430	11860066	ENSG00000273141	11908712	11909223	+	novel transcript, antisense to MPPE1	AP001269.4
CHMP1B-2	chr18	11819430	11860066	ENSG00000283492	11654885	11654941	-	microRNA 7153 [Source:HGNC Symbol;Acc:HGNC:50190]	MIR7153
CLCN6-1	chr1	11822797	11823280	ENSG00000011021	11806096	11843144	+
CLCN6-1	chr1	11822797	11823280	ENSG00000083444	11934205	11975538	+
CLCN6-1	chr1	11822797	11823280	ENSG00000116661	11637018	11655785	-
CLCN6-1	chr1	11822797	11823280	ENSG00000116663	11664124	11674354	+
CLCN6-1	chr1	11822797	11823280	ENSG00000116670	11674480	11691650	-
CLCN6-1	chr1	11822797	11823280	ENSG00000116685	11919591	11926428	-
CLCN6-1	chr1	11822797	11823280	ENSG00000116688	11980181	12013514	+
CLCN6-1	chr1	11822797	11823280	ENSG00000116691	12019466	12032045	+
CLCN6-1	chr1	11822797	11823280	ENSG00000120937	11857464	11858931	-
CLCN6-1	chr1	11822797	11823280	ENSG00000132879	11654375	11663327	+
CLCN6-1	chr1	11822797	11823280	ENSG00000162490	11691729	11725857	+
CLCN6-1	chr1	11822797	11823280	ENSG00000175206	11845709	11848345	-	natriuretic peptide A [Source:HGNC Symbol;Acc:HGNC:7939]	NPPA
CLCN6-1	chr1	11822797	11823280	ENSG00000177000	11785723	11806920	-
CLCN6-1	chr1	11822797	11823280	ENSG00000177553	11777077	11779619	-	C1orf167 antisense RNA 1 [Source:HGNC Symbol;Acc:HGNC:41091]	C1orf167-AS1
CLCN6-1	chr1	11822797	11823280	ENSG00000177674	11736084	11754802	+
CLCN6-1	chr1	11822797	11823280	ENSG00000199347	11908152	11908271	+	RNA, U5E small nuclear 1 [Source:HGNC Symbol;Acc:HGNC:10215]	RNU5E-1
CLCN6-1	chr1	11822797	11823280	ENSG00000201135	12077881	12077984	-	RNA, U6 small nuclear 777, pseudogene [Source:HGNC Symbol;Acc:HGNC:47740]	RNU6-777P
CLCN6-1	chr1	11822797	11823280	ENSG00000201801	11909808	11909927	-	RNA, U5E small nuclear 4, pseudogene [Source:HGNC Symbol;Acc:HGNC:42513]	RNU5E-4P
CLCN6-1	chr1	11822797	11823280	ENSG00000202461	12024012	12024124	-		AL096840.1
CLCN6-1	chr1	11822797	11823280	ENSG00000215910	11761787	11789585	+	chromosome 1 open reading frame 167 [Source:HGNC Symbol;Acc:HGNC:25262]	C1orf167
CLCN6-1	chr1	11822797	11823280	ENSG00000224904	11877770	11880406	+	SBF1 pseudogene 2 [Source:HGNC Symbol;Acc:HGNC:54552]	SBF1P2
CLCN6-1	chr1	11822797	11823280	ENSG00000227875	12080293	12080547	-	ribosomal protein L23a pseudogene 89 [Source:HGNC Symbol;Acc:HGNC:51623]	RPL23AP89
CLCN6-1	chr1	11822797	11823280	ENSG00000235643	11609531	11613355	+
CLCN6-1	chr1	11822797	11823280	ENSG00000242349	11841017	11848079	+
CLCN6-1	chr1	11822797	11823280	ENSG00000243539	12036740	12037014	-	RNA, 7SL, cytoplasmic 649, pseudogene [Source:HGNC Symbol;Acc:HGNC:46665]	RN7SL649P
CLCN6-1	chr1	11822797	11823280	ENSG00000270914	12017216	12017308	-	inositol(myo)-1(or 4)-monophosphatase 1 (IMPA1) pseudogene	AL096840.2
CLCN6-1	chr1	11822797	11823280	ENSG00000275915	11847442	11847549	+		AL021155.1
CLCN6-1	chr1	11822797	11823280	ENSG00000276470	11843812	11843984	+		AL021155.2
CLCN6-1	chr1	11822797	11823280	ENSG00000276869	12029158	12029222	+	microRNA 6729 [Source:HGNC Symbol;Acc:HGNC:50103]	MIR6729
CLCN6-1	chr1	11822797	11823280	ENSG00000278852	11845549	11845697	+		AL021155.3
CLCN6-1	chr1	11822797	11823280	ENSG00000284708	11623558	11643416	+	novel transcript	AL031731.1
CPB1-1	chr3	148850933	148960112	ENSG00000047457	149162410	149222055	-
CPB1-1	chr3	148850933	148960112	ENSG00000071794	149030127	149086554	-
CPB1-1	chr3	148850933	148960112	ENSG00000144891	148697784	148743008	+	angiotensin II receptor type 1 [Source:HGNC Symbol;Acc:HGNC:336]	AGTR1
CPB1-1	chr3	148850933	148960112	ENSG00000153002	148791102	148860187	+
CPB1-1	chr3	148850933	148960112	ENSG00000163751	148865256	148897196	+
CPB1-1	chr3	148850933	148960112	ENSG00000163754	148991341	149027668	+
CPB1-1	chr3	148850933	148960112	ENSG00000163755	149129584	149173732	+
CPB1-1	chr3	148850933	148960112	ENSG00000201031	149094353	149094462	-		AC021059.1
CPB1-1	chr3	148850933	148960112	ENSG00000239718	149086332	149102823	+	HLTF antisense RNA 1 [Source:HGNC Symbol;Acc:HGNC:40554]	HLTF-AS1
CPB1-1	chr3	148850933	148960112	ENSG00000240511	149099499	149099815	-	mediator complex subunit 28 pseudogene 2 [Source:HGNC Symbol;Acc:HGNC:45079]	MED28P2
CPB1-1	chr3	148850933	148960112	ENSG00000240521	148850933	148960112	-	novel transcript	AC092979.1
CPB1-1	chr3	148850933	148960112	ENSG00000241627	148985868	148987668	-	ubiquilin 4 pseudogene 1 [Source:HGNC Symbol;Acc:HGNC:31133]	UBQLN4P1
CPB1-1	chr3	148850933	148960112	ENSG00000241993	148695994	148696204	-	RPL38 pseudogene 1 [Source:HGNC Symbol;Acc:HGNC:17093]	RPL38P1
CPB1-1	chr3	148850933	148960112	ENSG00000244089	148824782	148825387	-	high mobility group box 1 pseudogene 30 [Source:HGNC Symbol;Acc:HGNC:39121]	HMGB1P30
CREB1-1	chr2	207176461	207260085	ENSG00000118263	207074137	207167267	-
CREB1-1	chr2	207176461	207260085	ENSG00000144410	206939554	206969474	+
CREB1-1	chr2	207176461	207260085	ENSG00000221628	207269275	207269424	-	microRNA 1302-4 [Source:HGNC Symbol;Acc:HGNC:35296]	MIR1302-4
CREB1-1	chr2	207176461	207260085	ENSG00000223725	207239864	207529795	-	novel transcript	AC009226.1
CREB1-1	chr2	207176461	207260085	ENSG00000224342	207173634	207222790	+	novel transcript	AC007879.1
CREB1-1	chr2	207176461	207260085	ENSG00000225064	207260445	207270690	+	long intergenic non-protein coding RNA 1802 [Source:HGNC Symbol;Acc:HGNC:52591]	LINC01802
CREB1-1	chr2	207176461	207260085	ENSG00000225916	207226949	207228308	+	novel transcript	AC007879.2
CREB1-1	chr2	207176461	207260085	ENSG00000229647	207239650	207245887	+
CREB1-1	chr2	207176461	207260085	ENSG00000234902	207186717	207236066	-	novel transcript	AC007879.3
CREB1-1	chr2	207176461	207260085	ENSG00000237892	207120884	207122044	-	KLF7 intronic transcript 1 [Source:HGNC Symbol;Acc:HGNC:41355]	KLF7-IT1
CREB1-1	chr2	207176461	207260085	ENSG00000240440	207235299	207237875	-	novel transcript	AC007879.4
CREB1-1	chr2	207176461	207260085	ENSG00000253008	207109987	207110073	-	microRNA 2355 [Source:HGNC Symbol;Acc:HGNC:38328]	MIR2355
CREB1-1	chr2	207176461	207260085	ENSG00000277590	207166400	207166498	+	microRNA 7845 [Source:HGNC Symbol;Acc:HGNC:50267]	MIR7845
CREB1-1	chr2	207176461	207529597	ENSG00000118260	207529737	207603431	+
CREB1-1	chr2	207176461	207529597	ENSG00000118260	207529737	207603431	+
CREB1-1	chr2	207176461	207529597	ENSG00000118263	207074137	207167267	-
CREB1-1	chr2	207176461	207529597	ENSG00000118263	207074137	207167267	-
CREB1-1	chr2	207176461	207529597	ENSG00000144401	207580631	207625928	-	methyltransferase like 21A [Source:HGNC Symbol;Acc:HGNC:30476]	METTL21A
CREB1-1	chr2	207176461	207529597	ENSG00000144410	206939554	206969474	+
CREB1-1	chr2	207176461	207529597	ENSG00000144410	206939554	206969474	+
CREB1-1	chr2	207176461	207529597	ENSG00000163249	207711540	207761839	+
CREB1-1	chr2	207176461	207529597	ENSG00000163249	207711540	207761839	+
CREB1-1	chr2	207176461	207529597	ENSG00000163251	207762586	207769563	-
CREB1-1	chr2	207176461	207529597	ENSG00000163251	207762586	207769563	-
CREB1-1	chr2	207176461	207529597	ENSG00000199251	207680533	207680639	-	RNA, U6 small nuclear 664, pseudogene [Source:HGNC Symbol;Acc:HGNC:47627]	RNU6-664P
CREB1-1	chr2	207176461	207529597	ENSG00000200764	207687960	207688059	+	Y RNA [Source:RFAM;Acc:RF00019]	Y_RNA
CREB1-1	chr2	207176461	207529597	ENSG00000213082	207681590	207682033	+	protein phosphatase 1 regulatory inhibitor subunit 14B pseudogene 2 [Source:HGNC Symbol;Acc:HGNC:16329]	PPP1R14BP2
CREB1-1	chr2	207176461	207529597	ENSG00000221628	207269275	207269424	-	microRNA 1302-4 [Source:HGNC Symbol;Acc:HGNC:35296]	MIR1302-4
CREB1-1	chr2	207176461	207529597	ENSG00000223433	207654781	207654951	+	ribosomal protein S29 pseudogene 9 [Source:HGNC Symbol;Acc:HGNC:36913]	RPS29P9
CREB1-1	chr2	207176461	207529597	ENSG00000223725	207239864	207529795	-	novel transcript	AC009226.1
CREB1-1	chr2	207176461	207529597	ENSG00000224137	207662375	207667024	+	long intergenic non-protein coding RNA 1857 [Source:HGNC Symbol;Acc:HGNC:52673]	LINC01857
CREB1-1	chr2	207176461	207529597	ENSG00000224342	207173634	207222790	+	novel transcript	AC007879.1
CREB1-1	chr2	207176461	207529597	ENSG00000225064	207260445	207270690	+	long intergenic non-protein coding RNA 1802 [Source:HGNC Symbol;Acc:HGNC:52591]	LINC01802
CREB1-1	chr2	207176461	207529597	ENSG00000225916	207226949	207228308	+	novel transcript	AC007879.2
CREB1-1	chr2	207176461	207529597	ENSG00000229647	207239650	207245887	+
CREB1-1	chr2	207176461	207529597	ENSG00000229647	207239650	207245887	+
CREB1-1	chr2	207176461	207529597	ENSG00000234902	207186717	207236066	-	novel transcript	AC007879.3
CREB1-1	chr2	207176461	207529597	ENSG00000237892	207120884	207122044	-	KLF7 intronic transcript 1 [Source:HGNC Symbol;Acc:HGNC:41355]	KLF7-IT1
CREB1-1	chr2	207176461	207529597	ENSG00000240440	207235299	207237875	-	novel transcript	AC007879.4
CREB1-1	chr2	207176461	207529597	ENSG00000253008	207109987	207110073	-	microRNA 2355 [Source:HGNC Symbol;Acc:HGNC:38328]	MIR2355
CREB1-1	chr2	207176461	207529597	ENSG00000272851	207753872	207754435	-	novel transcript	AC096772.1
CREB1-1	chr2	207176461	207529597	ENSG00000277590	207166400	207166498	+	microRNA 7845 [Source:HGNC Symbol;Acc:HGNC:50267]	MIR7845
CREB1-1	chr2	207176461	207529597	ENSG00000284079	207754807	207754881	+	microRNA 4775 [Source:HGNC Symbol;Acc:HGNC:41885]	MIR4775
CREB1-1	chr2	207176461	207529981	ENSG00000118260	207529737	207603431	+
CREB1-1	chr2	207176461	207529981	ENSG00000118263	207074137	207167267	-
CREB1-1	chr2	207176461	207529981	ENSG00000144401	207580631	207625928	-	methyltransferase like 21A [Source:HGNC Symbol;Acc:HGNC:30476]	METTL21A
CREB1-1	chr2	207176461	207529981	ENSG00000144410	206939554	206969474	+
CREB1-1	chr2	207176461	207529981	ENSG00000163249	207711540	207761839	+
CREB1-1	chr2	207176461	207529981	ENSG00000163251	207762586	207769563	-
CREB1-1	chr2	207176461	207529981	ENSG00000199251	207680533	207680639	-	RNA, U6 small nuclear 664, pseudogene [Source:HGNC Symbol;Acc:HGNC:47627]	RNU6-664P
CREB1-1	chr2	207176461	207529981	ENSG00000200764	207687960	207688059	+	Y RNA [Source:RFAM;Acc:RF00019]	Y_RNA
CREB1-1	chr2	207176461	207529981	ENSG00000213082	207681590	207682033	+	protein phosphatase 1 regulatory inhibitor subunit 14B pseudogene 2 [Source:HGNC Symbol;Acc:HGNC:16329]	PPP1R14BP2
CREB1-1	chr2	207176461	207529981	ENSG00000221628	207269275	207269424	-	microRNA 1302-4 [Source:HGNC Symbol;Acc:HGNC:35296]	MIR1302-4
CREB1-1	chr2	207176461	207529981	ENSG00000223433	207654781	207654951	+	ribosomal protein S29 pseudogene 9 [Source:HGNC Symbol;Acc:HGNC:36913]	RPS29P9
CREB1-1	chr2	207176461	207529981	ENSG00000223725	207239864	207529795	-	novel transcript	AC009226.1
CREB1-1	chr2	207176461	207529981	ENSG00000224137	207662375	207667024	+	long intergenic non-protein coding RNA 1857 [Source:HGNC Symbol;Acc:HGNC:52673]	LINC01857
CREB1-1	chr2	207176461	207529981	ENSG00000224342	207173634	207222790	+	novel transcript	AC007879.1
CREB1-1	chr2	207176461	207529981	ENSG00000225064	207260445	207270690	+	long intergenic non-protein coding RNA 1802 [Source:HGNC Symbol;Acc:HGNC:52591]	LINC01802
CREB1-1	chr2	207176461	207529981	ENSG00000225916	207226949	207228308	+	novel transcript	AC007879.2
CREB1-1	chr2	207176461	207529981	ENSG00000229647	207239650	207245887	+
CREB1-1	chr2	207176461	207529981	ENSG00000234902	207186717	207236066	-	novel transcript	AC007879.3
CREB1-1	chr2	207176461	207529981	ENSG00000237892	207120884	207122044	-	KLF7 intronic transcript 1 [Source:HGNC Symbol;Acc:HGNC:41355]	KLF7-IT1
CREB1-1	chr2	207176461	207529981	ENSG00000240440	207235299	207237875	-	novel transcript	AC007879.4
CREB1-1	chr2	207176461	207529981	ENSG00000253008	207109987	207110073	-	microRNA 2355 [Source:HGNC Symbol;Acc:HGNC:38328]	MIR2355
CREB1-1	chr2	207176461	207529981	ENSG00000272851	207753872	207754435	-	novel transcript	AC096772.1
CREB1-1	chr2	207176461	207529981	ENSG00000277590	207166400	207166498	+	microRNA 7845 [Source:HGNC Symbol;Acc:HGNC:50267]	MIR7845
CREB1-1	chr2	207176461	207529981	ENSG00000284079	207754807	207754881	+	microRNA 4775 [Source:HGNC Symbol;Acc:HGNC:41885]	MIR4775
CREB1-1	chr2	207176497	207236955	ENSG00000118263	207074137	207167267	-
CREB1-1	chr2	207176497	207236955	ENSG00000144410	206939554	206969474	+
CREB1-1	chr2	207176497	207236955	ENSG00000221628	207269275	207269424	-	microRNA 1302-4 [Source:HGNC Symbol;Acc:HGNC:35296]	MIR1302-4
CREB1-1	chr2	207176497	207236955	ENSG00000223725	207239864	207529795	-	novel transcript	AC009226.1
CREB1-1	chr2	207176497	207236955	ENSG00000224342	207173634	207222790	+	novel transcript	AC007879.1
CREB1-1	chr2	207176497	207236955	ENSG00000225064	207260445	207270690	+	long intergenic non-protein coding RNA 1802 [Source:HGNC Symbol;Acc:HGNC:52591]	LINC01802
CREB1-1	chr2	207176497	207236955	ENSG00000225916	207226949	207228308	+	novel transcript	AC007879.2
CREB1-1	chr2	207176497	207236955	ENSG00000229647	207239650	207245887	+
CREB1-1	chr2	207176497	207236955	ENSG00000234902	207186717	207236066	-	novel transcript	AC007879.3
CREB1-1	chr2	207176497	207236955	ENSG00000237892	207120884	207122044	-	KLF7 intronic transcript 1 [Source:HGNC Symbol;Acc:HGNC:41355]	KLF7-IT1
CREB1-1	chr2	207176497	207236955	ENSG00000240440	207235299	207237875	-	novel transcript	AC007879.4
CREB1-1	chr2	207176497	207236955	ENSG00000253008	207109987	207110073	-	microRNA 2355 [Source:HGNC Symbol;Acc:HGNC:38328]	MIR2355
CREB1-1	chr2	207176497	207236955	ENSG00000277590	207166400	207166498	+	microRNA 7845 [Source:HGNC Symbol;Acc:HGNC:50267]	MIR7845
CREB1-1	chr2	207176497	207239696	ENSG00000118263	207074137	207167267	-
CREB1-1	chr2	207176497	207239696	ENSG00000144410	206939554	206969474	+
CREB1-1	chr2	207176497	207239696	ENSG00000221628	207269275	207269424	-	microRNA 1302-4 [Source:HGNC Symbol;Acc:HGNC:35296]	MIR1302-4
CREB1-1	chr2	207176497	207239696	ENSG00000223725	207239864	207529795	-	novel transcript	AC009226.1
CREB1-1	chr2	207176497	207239696	ENSG00000224342	207173634	207222790	+	novel transcript	AC007879.1
CREB1-1	chr2	207176497	207239696	ENSG00000225064	207260445	207270690	+	long intergenic non-protein coding RNA 1802 [Source:HGNC Symbol;Acc:HGNC:52591]	LINC01802
CREB1-1	chr2	207176497	207239696	ENSG00000225916	207226949	207228308	+	novel transcript	AC007879.2
CREB1-1	chr2	207176497	207239696	ENSG00000229647	207239650	207245887	+
CREB1-1	chr2	207176497	207239696	ENSG00000234902	207186717	207236066	-	novel transcript	AC007879.3
CREB1-1	chr2	207176497	207239696	ENSG00000237892	207120884	207122044	-	KLF7 intronic transcript 1 [Source:HGNC Symbol;Acc:HGNC:41355]	KLF7-IT1
CREB1-1	chr2	207176497	207239696	ENSG00000240440	207235299	207237875	-	novel transcript	AC007879.4
CREB1-1	chr2	207176497	207239696	ENSG00000253008	207109987	207110073	-	microRNA 2355 [Source:HGNC Symbol;Acc:HGNC:38328]	MIR2355
CREB1-1	chr2	207176497	207239696	ENSG00000277590	207166400	207166498	+	microRNA 7845 [Source:HGNC Symbol;Acc:HGNC:50267]	MIR7845
CREB1-1	chr2	207176497	207254305	ENSG00000118263	207074137	207167267	-
CREB1-1	chr2	207176497	207254305	ENSG00000144410	206939554	206969474	+
CREB1-1	chr2	207176497	207254305	ENSG00000221628	207269275	207269424	-	microRNA 1302-4 [Source:HGNC Symbol;Acc:HGNC:35296]	MIR1302-4
CREB1-1	chr2	207176497	207254305	ENSG00000223725	207239864	207529795	-	novel transcript	AC009226.1
CREB1-1	chr2	207176497	207254305	ENSG00000224342	207173634	207222790	+	novel transcript	AC007879.1
CREB1-1	chr2	207176497	207254305	ENSG00000225064	207260445	207270690	+	long intergenic non-protein coding RNA 1802 [Source:HGNC Symbol;Acc:HGNC:52591]	LINC01802
CREB1-1	chr2	207176497	207254305	ENSG00000225916	207226949	207228308	+	novel transcript	AC007879.2
CREB1-1	chr2	207176497	207254305	ENSG00000229647	207239650	207245887	+
CREB1-1	chr2	207176497	207254305	ENSG00000234902	207186717	207236066	-	novel transcript	AC007879.3
CREB1-1	chr2	207176497	207254305	ENSG00000237892	207120884	207122044	-	KLF7 intronic transcript 1 [Source:HGNC Symbol;Acc:HGNC:41355]	KLF7-IT1
CREB1-1	chr2	207176497	207254305	ENSG00000240440	207235299	207237875	-	novel transcript	AC007879.4
CREB1-1	chr2	207176497	207254305	ENSG00000253008	207109987	207110073	-	microRNA 2355 [Source:HGNC Symbol;Acc:HGNC:38328]	MIR2355
CREB1-1	chr2	207176497	207254305	ENSG00000277590	207166400	207166498	+	microRNA 7845 [Source:HGNC Symbol;Acc:HGNC:50267]	MIR7845
CREB1-1	chr2	207176497	207254505	ENSG00000118263	207074137	207167267	-
CREB1-1	chr2	207176497	207254505	ENSG00000144410	206939554	206969474	+
CREB1-1	chr2	207176497	207254505	ENSG00000221628	207269275	207269424	-	microRNA 1302-4 [Source:HGNC Symbol;Acc:HGNC:35296]	MIR1302-4
CREB1-1	chr2	207176497	207254505	ENSG00000223725	207239864	207529795	-	novel transcript	AC009226.1
CREB1-1	chr2	207176497	207254505	ENSG00000224342	207173634	207222790	+	novel transcript	AC007879.1
CREB1-1	chr2	207176497	207254505	ENSG00000225064	207260445	207270690	+	long intergenic non-protein coding RNA 1802 [Source:HGNC Symbol;Acc:HGNC:52591]	LINC01802
CREB1-1	chr2	207176497	207254505	ENSG00000225916	207226949	207228308	+	novel transcript	AC007879.2
CREB1-1	chr2	207176497	207254505	ENSG00000229647	207239650	207245887	+
CREB1-1	chr2	207176497	207254505	ENSG00000234902	207186717	207236066	-	novel transcript	AC007879.3
CREB1-1	chr2	207176497	207254505	ENSG00000237892	207120884	207122044	-	KLF7 intronic transcript 1 [Source:HGNC Symbol;Acc:HGNC:41355]	KLF7-IT1
CREB1-1	chr2	207176497	207254505	ENSG00000240440	207235299	207237875	-	novel transcript	AC007879.4
CREB1-1	chr2	207176497	207254505	ENSG00000253008	207109987	207110073	-	microRNA 2355 [Source:HGNC Symbol;Acc:HGNC:38328]	MIR2355
CREB1-1	chr2	207176497	207254505	ENSG00000277590	207166400	207166498	+	microRNA 7845 [Source:HGNC Symbol;Acc:HGNC:50267]	MIR7845
CREB1-1	chr2	207176497	207529981	ENSG00000118260	207529737	207603431	+
CREB1-1	chr2	207176497	207529981	ENSG00000118263	207074137	207167267	-
CREB1-1	chr2	207176497	207529981	ENSG00000144401	207580631	207625928	-	methyltransferase like 21A [Source:HGNC Symbol;Acc:HGNC:30476]	METTL21A
CREB1-1	chr2	207176497	207529981	ENSG00000144410	206939554	206969474	+
CREB1-1	chr2	207176497	207529981	ENSG00000163249	207711540	207761839	+
CREB1-1	chr2	207176497	207529981	ENSG00000163251	207762586	207769563	-
CREB1-1	chr2	207176497	207529981	ENSG00000199251	207680533	207680639	-	RNA, U6 small nuclear 664, pseudogene [Source:HGNC Symbol;Acc:HGNC:47627]	RNU6-664P
CREB1-1	chr2	207176497	207529981	ENSG00000200764	207687960	207688059	+	Y RNA [Source:RFAM;Acc:RF00019]	Y_RNA
CREB1-1	chr2	207176497	207529981	ENSG00000213082	207681590	207682033	+	protein phosphatase 1 regulatory inhibitor subunit 14B pseudogene 2 [Source:HGNC Symbol;Acc:HGNC:16329]	PPP1R14BP2
CREB1-1	chr2	207176497	207529981	ENSG00000221628	207269275	207269424	-	microRNA 1302-4 [Source:HGNC Symbol;Acc:HGNC:35296]	MIR1302-4
CREB1-1	chr2	207176497	207529981	ENSG00000223433	207654781	207654951	+	ribosomal protein S29 pseudogene 9 [Source:HGNC Symbol;Acc:HGNC:36913]	RPS29P9
CREB1-1	chr2	207176497	207529981	ENSG00000223725	207239864	207529795	-	novel transcript	AC009226.1
CREB1-1	chr2	207176497	207529981	ENSG00000224137	207662375	207667024	+	long intergenic non-protein coding RNA 1857 [Source:HGNC Symbol;Acc:HGNC:52673]	LINC01857
CREB1-1	chr2	207176497	207529981	ENSG00000224342	207173634	207222790	+	novel transcript	AC007879.1
CREB1-1	chr2	207176497	207529981	ENSG00000225064	207260445	207270690	+	long intergenic non-protein coding RNA 1802 [Source:HGNC Symbol;Acc:HGNC:52591]	LINC01802
CREB1-1	chr2	207176497	207529981	ENSG00000225916	207226949	207228308	+	novel transcript	AC007879.2
CREB1-1	chr2	207176497	207529981	ENSG00000229647	207239650	207245887	+
CREB1-1	chr2	207176497	207529981	ENSG00000234902	207186717	207236066	-	novel transcript	AC007879.3
CREB1-1	chr2	207176497	207529981	ENSG00000237892	207120884	207122044	-	KLF7 intronic transcript 1 [Source:HGNC Symbol;Acc:HGNC:41355]	KLF7-IT1
CREB1-1	chr2	207176497	207529981	ENSG00000240440	207235299	207237875	-	novel transcript	AC007879.4
CREB1-1	chr2	207176497	207529981	ENSG00000253008	207109987	207110073	-	microRNA 2355 [Source:HGNC Symbol;Acc:HGNC:38328]	MIR2355
CREB1-1	chr2	207176497	207529981	ENSG00000272851	207753872	207754435	-	novel transcript	AC096772.1
CREB1-1	chr2	207176497	207529981	ENSG00000277590	207166400	207166498	+	microRNA 7845 [Source:HGNC Symbol;Acc:HGNC:50267]	MIR7845
CREB1-1	chr2	207176497	207529981	ENSG00000284079	207754807	207754881	+	microRNA 4775 [Source:HGNC Symbol;Acc:HGNC:41885]	MIR4775
CREB1-1	chr2	207184288	207529597	ENSG00000118260	207529737	207603431	+
CREB1-1	chr2	207184288	207529597	ENSG00000118263	207074137	207167267	-
CREB1-1	chr2	207184288	207529597	ENSG00000144401	207580631	207625928	-	methyltransferase like 21A [Source:HGNC Symbol;Acc:HGNC:30476]	METTL21A
CREB1-1	chr2	207184288	207529597	ENSG00000144410	206939554	206969474	+
CREB1-1	chr2	207184288	207529597	ENSG00000163249	207711540	207761839	+
CREB1-1	chr2	207184288	207529597	ENSG00000163251	207762586	207769563	-
CREB1-1	chr2	207184288	207529597	ENSG00000199251	207680533	207680639	-	RNA, U6 small nuclear 664, pseudogene [Source:HGNC Symbol;Acc:HGNC:47627]	RNU6-664P
CREB1-1	chr2	207184288	207529597	ENSG00000200764	207687960	207688059	+	Y RNA [Source:RFAM;Acc:RF00019]	Y_RNA
CREB1-1	chr2	207184288	207529597	ENSG00000213082	207681590	207682033	+	protein phosphatase 1 regulatory inhibitor subunit 14B pseudogene 2 [Source:HGNC Symbol;Acc:HGNC:16329]	PPP1R14BP2
CREB1-1	chr2	207184288	207529597	ENSG00000221628	207269275	207269424	-	microRNA 1302-4 [Source:HGNC Symbol;Acc:HGNC:35296]	MIR1302-4
CREB1-1	chr2	207184288	207529597	ENSG00000223433	207654781	207654951	+	ribosomal protein S29 pseudogene 9 [Source:HGNC Symbol;Acc:HGNC:36913]	RPS29P9
CREB1-1	chr2	207184288	207529597	ENSG00000223725	207239864	207529795	-	novel transcript	AC009226.1
CREB1-1	chr2	207184288	207529597	ENSG00000224137	207662375	207667024	+	long intergenic non-protein coding RNA 1857 [Source:HGNC Symbol;Acc:HGNC:52673]	LINC01857
CREB1-1	chr2	207184288	207529597	ENSG00000224342	207173634	207222790	+	novel transcript	AC007879.1
CREB1-1	chr2	207184288	207529597	ENSG00000225064	207260445	207270690	+	long intergenic non-protein coding RNA 1802 [Source:HGNC Symbol;Acc:HGNC:52591]	LINC01802
CREB1-1	chr2	207184288	207529597	ENSG00000225916	207226949	207228308	+	novel transcript	AC007879.2
CREB1-1	chr2	207184288	207529597	ENSG00000229647	207239650	207245887	+
CREB1-1	chr2	207184288	207529597	ENSG00000234902	207186717	207236066	-	novel transcript	AC007879.3
CREB1-1	chr2	207184288	207529597	ENSG00000237892	207120884	207122044	-	KLF7 intronic transcript 1 [Source:HGNC Symbol;Acc:HGNC:41355]	KLF7-IT1
CREB1-1	chr2	207184288	207529597	ENSG00000240440	207235299	207237875	-	novel transcript	AC007879.4
CREB1-1	chr2	207184288	207529597	ENSG00000253008	207109987	207110073	-	microRNA 2355 [Source:HGNC Symbol;Acc:HGNC:38328]	MIR2355
CREB1-1	chr2	207184288	207529597	ENSG00000272851	207753872	207754435	-	novel transcript	AC096772.1
CREB1-1	chr2	207184288	207529597	ENSG00000277590	207166400	207166498	+	microRNA 7845 [Source:HGNC Symbol;Acc:HGNC:50267]	MIR7845
CREB1-1	chr2	207184288	207529597	ENSG00000284079	207754807	207754881	+	microRNA 4775 [Source:HGNC Symbol;Acc:HGNC:41885]	MIR4775
CREB1-1	chr2	207184288	207529773	ENSG00000118260	207529737	207603431	+
CREB1-1	chr2	207184288	207529773	ENSG00000118263	207074137	207167267	-
CREB1-1	chr2	207184288	207529773	ENSG00000144401	207580631	207625928	-	methyltransferase like 21A [Source:HGNC Symbol;Acc:HGNC:30476]	METTL21A
CREB1-1	chr2	207184288	207529773	ENSG00000144410	206939554	206969474	+
CREB1-1	chr2	207184288	207529773	ENSG00000163249	207711540	207761839	+
CREB1-1	chr2	207184288	207529773	ENSG00000163251	207762586	207769563	-
CREB1-1	chr2	207184288	207529773	ENSG00000199251	207680533	207680639	-	RNA, U6 small nuclear 664, pseudogene [Source:HGNC Symbol;Acc:HGNC:47627]	RNU6-664P
CREB1-1	chr2	207184288	207529773	ENSG00000200764	207687960	207688059	+	Y RNA [Source:RFAM;Acc:RF00019]	Y_RNA
CREB1-1	chr2	207184288	207529773	ENSG00000213082	207681590	207682033	+	protein phosphatase 1 regulatory inhibitor subunit 14B pseudogene 2 [Source:HGNC Symbol;Acc:HGNC:16329]	PPP1R14BP2
CREB1-1	chr2	207184288	207529773	ENSG00000221628	207269275	207269424	-	microRNA 1302-4 [Source:HGNC Symbol;Acc:HGNC:35296]	MIR1302-4
CREB1-1	chr2	207184288	207529773	ENSG00000223433	207654781	207654951	+	ribosomal protein S29 pseudogene 9 [Source:HGNC Symbol;Acc:HGNC:36913]	RPS29P9
CREB1-1	chr2	207184288	207529773	ENSG00000223725	207239864	207529795	-	novel transcript	AC009226.1
CREB1-1	chr2	207184288	207529773	ENSG00000224137	207662375	207667024	+	long intergenic non-protein coding RNA 1857 [Source:HGNC Symbol;Acc:HGNC:52673]	LINC01857
CREB1-1	chr2	207184288	207529773	ENSG00000224342	207173634	207222790	+	novel transcript	AC007879.1
CREB1-1	chr2	207184288	207529773	ENSG00000225064	207260445	207270690	+	long intergenic non-protein coding RNA 1802 [Source:HGNC Symbol;Acc:HGNC:52591]	LINC01802
CREB1-1	chr2	207184288	207529773	ENSG00000225916	207226949	207228308	+	novel transcript	AC007879.2
CREB1-1	chr2	207184288	207529773	ENSG00000229647	207239650	207245887	+
CREB1-1	chr2	207184288	207529773	ENSG00000234902	207186717	207236066	-	novel transcript	AC007879.3
CREB1-1	chr2	207184288	207529773	ENSG00000237892	207120884	207122044	-	KLF7 intronic transcript 1 [Source:HGNC Symbol;Acc:HGNC:41355]	KLF7-IT1
CREB1-1	chr2	207184288	207529773	ENSG00000240440	207235299	207237875	-	novel transcript	AC007879.4
CREB1-1	chr2	207184288	207529773	ENSG00000253008	207109987	207110073	-	microRNA 2355 [Source:HGNC Symbol;Acc:HGNC:38328]	MIR2355
CREB1-1	chr2	207184288	207529773	ENSG00000272851	207753872	207754435	-	novel transcript	AC096772.1
CREB1-1	chr2	207184288	207529773	ENSG00000277590	207166400	207166498	+	microRNA 7845 [Source:HGNC Symbol;Acc:HGNC:50267]	MIR7845
CREB1-1	chr2	207184288	207529773	ENSG00000284079	207754807	207754881	+	microRNA 4775 [Source:HGNC Symbol;Acc:HGNC:41885]	MIR4775
CREB1-1	chr2	207185283	207529773	ENSG00000118260	207529737	207603431	+
CREB1-1	chr2	207185283	207529773	ENSG00000118263	207074137	207167267	-
CREB1-1	chr2	207185283	207529773	ENSG00000144401	207580631	207625928	-	methyltransferase like 21A [Source:HGNC Symbol;Acc:HGNC:30476]	METTL21A
CREB1-1	chr2	207185283	207529773	ENSG00000144410	206939554	206969474	+
CREB1-1	chr2	207185283	207529773	ENSG00000163249	207711540	207761839	+
CREB1-1	chr2	207185283	207529773	ENSG00000163251	207762586	207769563	-
CREB1-1	chr2	207185283	207529773	ENSG00000199251	207680533	207680639	-	RNA, U6 small nuclear 664, pseudogene [Source:HGNC Symbol;Acc:HGNC:47627]	RNU6-664P
CREB1-1	chr2	207185283	207529773	ENSG00000200764	207687960	207688059	+	Y RNA [Source:RFAM;Acc:RF00019]	Y_RNA
CREB1-1	chr2	207185283	207529773	ENSG00000213082	207681590	207682033	+	protein phosphatase 1 regulatory inhibitor subunit 14B pseudogene 2 [Source:HGNC Symbol;Acc:HGNC:16329]	PPP1R14BP2
CREB1-1	chr2	207185283	207529773	ENSG00000221628	207269275	207269424	-	microRNA 1302-4 [Source:HGNC Symbol;Acc:HGNC:35296]	MIR1302-4
CREB1-1	chr2	207185283	207529773	ENSG00000223433	207654781	207654951	+	ribosomal protein S29 pseudogene 9 [Source:HGNC Symbol;Acc:HGNC:36913]	RPS29P9
CREB1-1	chr2	207185283	207529773	ENSG00000223725	207239864	207529795	-	novel transcript	AC009226.1
CREB1-1	chr2	207185283	207529773	ENSG00000224137	207662375	207667024	+	long intergenic non-protein coding RNA 1857 [Source:HGNC Symbol;Acc:HGNC:52673]	LINC01857
CREB1-1	chr2	207185283	207529773	ENSG00000224342	207173634	207222790	+	novel transcript	AC007879.1
CREB1-1	chr2	207185283	207529773	ENSG00000225064	207260445	207270690	+	long intergenic non-protein coding RNA 1802 [Source:HGNC Symbol;Acc:HGNC:52591]	LINC01802
CREB1-1	chr2	207185283	207529773	ENSG00000225916	207226949	207228308	+	novel transcript	AC007879.2
CREB1-1	chr2	207185283	207529773	ENSG00000229647	207239650	207245887	+
CREB1-1	chr2	207185283	207529773	ENSG00000234902	207186717	207236066	-	novel transcript	AC007879.3
CREB1-1	chr2	207185283	207529773	ENSG00000237892	207120884	207122044	-	KLF7 intronic transcript 1 [Source:HGNC Symbol;Acc:HGNC:41355]	KLF7-IT1
CREB1-1	chr2	207185283	207529773	ENSG00000240440	207235299	207237875	-	novel transcript	AC007879.4
CREB1-1	chr2	207185283	207529773	ENSG00000253008	207109987	207110073	-	microRNA 2355 [Source:HGNC Symbol;Acc:HGNC:38328]	MIR2355
CREB1-1	chr2	207185283	207529773	ENSG00000272851	207753872	207754435	-	novel transcript	AC096772.1
CREB1-1	chr2	207185283	207529773	ENSG00000277590	207166400	207166498	+	microRNA 7845 [Source:HGNC Symbol;Acc:HGNC:50267]	MIR7845
CREB1-1	chr2	207185283	207529773	ENSG00000284079	207754807	207754881	+	microRNA 4775 [Source:HGNC Symbol;Acc:HGNC:41885]	MIR4775
CREB1-1	chr2	207186034	207254288	ENSG00000118263	207074137	207167267	-
CREB1-1	chr2	207186034	207254288	ENSG00000144410	206939554	206969474	+
CREB1-1	chr2	207186034	207254288	ENSG00000221628	207269275	207269424	-	microRNA 1302-4 [Source:HGNC Symbol;Acc:HGNC:35296]	MIR1302-4
CREB1-1	chr2	207186034	207254288	ENSG00000223725	207239864	207529795	-	novel transcript	AC009226.1
CREB1-1	chr2	207186034	207254288	ENSG00000224342	207173634	207222790	+	novel transcript	AC007879.1
CREB1-1	chr2	207186034	207254288	ENSG00000225064	207260445	207270690	+	long intergenic non-protein coding RNA 1802 [Source:HGNC Symbol;Acc:HGNC:52591]	LINC01802
CREB1-1	chr2	207186034	207254288	ENSG00000225916	207226949	207228308	+	novel transcript	AC007879.2
CREB1-1	chr2	207186034	207254288	ENSG00000229647	207239650	207245887	+
CREB1-1	chr2	207186034	207254288	ENSG00000234902	207186717	207236066	-	novel transcript	AC007879.3
CREB1-1	chr2	207186034	207254288	ENSG00000237892	207120884	207122044	-	KLF7 intronic transcript 1 [Source:HGNC Symbol;Acc:HGNC:41355]	KLF7-IT1
CREB1-1	chr2	207186034	207254288	ENSG00000240440	207235299	207237875	-	novel transcript	AC007879.4
CREB1-1	chr2	207186034	207254288	ENSG00000253008	207109987	207110073	-	microRNA 2355 [Source:HGNC Symbol;Acc:HGNC:38328]	MIR2355
CREB1-1	chr2	207186034	207254288	ENSG00000277590	207166400	207166498	+	microRNA 7845 [Source:HGNC Symbol;Acc:HGNC:50267]	MIR7845
CREB1-1	chr2	207186209	207254505	ENSG00000118263	207074137	207167267	-
CREB1-1	chr2	207186209	207254505	ENSG00000144410	206939554	206969474	+
CREB1-1	chr2	207186209	207254505	ENSG00000221628	207269275	207269424	-	microRNA 1302-4 [Source:HGNC Symbol;Acc:HGNC:35296]	MIR1302-4
CREB1-1	chr2	207186209	207254505	ENSG00000223725	207239864	207529795	-	novel transcript	AC009226.1
CREB1-1	chr2	207186209	207254505	ENSG00000224342	207173634	207222790	+	novel transcript	AC007879.1
CREB1-1	chr2	207186209	207254505	ENSG00000225064	207260445	207270690	+	long intergenic non-protein coding RNA 1802 [Source:HGNC Symbol;Acc:HGNC:52591]	LINC01802
CREB1-1	chr2	207186209	207254505	ENSG00000225916	207226949	207228308	+	novel transcript	AC007879.2
CREB1-1	chr2	207186209	207254505	ENSG00000229647	207239650	207245887	+
CREB1-1	chr2	207186209	207254505	ENSG00000234902	207186717	207236066	-	novel transcript	AC007879.3
CREB1-1	chr2	207186209	207254505	ENSG00000237892	207120884	207122044	-	KLF7 intronic transcript 1 [Source:HGNC Symbol;Acc:HGNC:41355]	KLF7-IT1
CREB1-1	chr2	207186209	207254505	ENSG00000240440	207235299	207237875	-	novel transcript	AC007879.4
CREB1-1	chr2	207186209	207254505	ENSG00000253008	207109987	207110073	-	microRNA 2355 [Source:HGNC Symbol;Acc:HGNC:38328]	MIR2355
CREB1-1	chr2	207186209	207254505	ENSG00000277590	207166400	207166498	+	microRNA 7845 [Source:HGNC Symbol;Acc:HGNC:50267]	MIR7845
CREB1-1	chr2	207186658	207254505	ENSG00000118263	207074137	207167267	-
CREB1-1	chr2	207186658	207254505	ENSG00000144410	206939554	206969474	+
CREB1-1	chr2	207186658	207254505	ENSG00000221628	207269275	207269424	-	microRNA 1302-4 [Source:HGNC Symbol;Acc:HGNC:35296]	MIR1302-4
CREB1-1	chr2	207186658	207254505	ENSG00000223725	207239864	207529795	-	novel transcript	AC009226.1
CREB1-1	chr2	207186658	207254505	ENSG00000224342	207173634	207222790	+	novel transcript	AC007879.1
CREB1-1	chr2	207186658	207254505	ENSG00000225064	207260445	207270690	+	long intergenic non-protein coding RNA 1802 [Source:HGNC Symbol;Acc:HGNC:52591]	LINC01802
CREB1-1	chr2	207186658	207254505	ENSG00000225916	207226949	207228308	+	novel transcript	AC007879.2
CREB1-1	chr2	207186658	207254505	ENSG00000229647	207239650	207245887	+
CREB1-1	chr2	207186658	207254505	ENSG00000234902	207186717	207236066	-	novel transcript	AC007879.3
CREB1-1	chr2	207186658	207254505	ENSG00000237892	207120884	207122044	-	KLF7 intronic transcript 1 [Source:HGNC Symbol;Acc:HGNC:41355]	KLF7-IT1
CREB1-1	chr2	207186658	207254505	ENSG00000240440	207235299	207237875	-	novel transcript	AC007879.4
CREB1-1	chr2	207186658	207254505	ENSG00000253008	207109987	207110073	-	microRNA 2355 [Source:HGNC Symbol;Acc:HGNC:38328]	MIR2355
CREB1-1	chr2	207186658	207254505	ENSG00000277590	207166400	207166498	+	microRNA 7845 [Source:HGNC Symbol;Acc:HGNC:50267]	MIR7845
CREB1-1	chr2	207186690	207254316	ENSG00000118263	207074137	207167267	-
CREB1-1	chr2	207186690	207254316	ENSG00000144410	206939554	206969474	+
CREB1-1	chr2	207186690	207254316	ENSG00000221628	207269275	207269424	-	microRNA 1302-4 [Source:HGNC Symbol;Acc:HGNC:35296]	MIR1302-4
CREB1-1	chr2	207186690	207254316	ENSG00000223725	207239864	207529795	-	novel transcript	AC009226.1
CREB1-1	chr2	207186690	207254316	ENSG00000224342	207173634	207222790	+	novel transcript	AC007879.1
CREB1-1	chr2	207186690	207254316	ENSG00000225064	207260445	207270690	+	long intergenic non-protein coding RNA 1802 [Source:HGNC Symbol;Acc:HGNC:52591]	LINC01802
CREB1-1	chr2	207186690	207254316	ENSG00000225916	207226949	207228308	+	novel transcript	AC007879.2
CREB1-1	chr2	207186690	207254316	ENSG00000229647	207239650	207245887	+
CREB1-1	chr2	207186690	207254316	ENSG00000234902	207186717	207236066	-	novel transcript	AC007879.3
CREB1-1	chr2	207186690	207254316	ENSG00000237892	207120884	207122044	-	KLF7 intronic transcript 1 [Source:HGNC Symbol;Acc:HGNC:41355]	KLF7-IT1
CREB1-1	chr2	207186690	207254316	ENSG00000240440	207235299	207237875	-	novel transcript	AC007879.4
CREB1-1	chr2	207186690	207254316	ENSG00000253008	207109987	207110073	-	microRNA 2355 [Source:HGNC Symbol;Acc:HGNC:38328]	MIR2355
CREB1-1	chr2	207186690	207254316	ENSG00000277590	207166400	207166498	+	microRNA 7845 [Source:HGNC Symbol;Acc:HGNC:50267]	MIR7845
CREB1-1	chr2	207186717	207235883	ENSG00000118263	207074137	207167267	-
CREB1-1	chr2	207186717	207235883	ENSG00000144410	206939554	206969474	+
CREB1-1	chr2	207186717	207235883	ENSG00000221628	207269275	207269424	-	microRNA 1302-4 [Source:HGNC Symbol;Acc:HGNC:35296]	MIR1302-4
CREB1-1	chr2	207186717	207235883	ENSG00000223725	207239864	207529795	-	novel transcript	AC009226.1
CREB1-1	chr2	207186717	207235883	ENSG00000224342	207173634	207222790	+	novel transcript	AC007879.1
CREB1-1	chr2	207186717	207235883	ENSG00000225064	207260445	207270690	+	long intergenic non-protein coding RNA 1802 [Source:HGNC Symbol;Acc:HGNC:52591]	LINC01802
CREB1-1	chr2	207186717	207235883	ENSG00000225916	207226949	207228308	+	novel transcript	AC007879.2
CREB1-1	chr2	207186717	207235883	ENSG00000229647	207239650	207245887	+
CREB1-1	chr2	207186717	207235883	ENSG00000234902	207186717	207236066	-	novel transcript	AC007879.3
CREB1-1	chr2	207186717	207235883	ENSG00000237892	207120884	207122044	-	KLF7 intronic transcript 1 [Source:HGNC Symbol;Acc:HGNC:41355]	KLF7-IT1
CREB1-1	chr2	207186717	207235883	ENSG00000240440	207235299	207237875	-	novel transcript	AC007879.4
CREB1-1	chr2	207186717	207235883	ENSG00000253008	207109987	207110073	-	microRNA 2355 [Source:HGNC Symbol;Acc:HGNC:38328]	MIR2355
CREB1-1	chr2	207186717	207235883	ENSG00000277590	207166400	207166498	+	microRNA 7845 [Source:HGNC Symbol;Acc:HGNC:50267]	MIR7845
CREB1-1	chr2	207219664	207236066	ENSG00000118263	207074137	207167267	-
CREB1-1	chr2	207219664	207236066	ENSG00000144410	206939554	206969474	+
CREB1-1	chr2	207219664	207236066	ENSG00000221628	207269275	207269424	-	microRNA 1302-4 [Source:HGNC Symbol;Acc:HGNC:35296]	MIR1302-4
CREB1-1	chr2	207219664	207236066	ENSG00000223725	207239864	207529795	-	novel transcript	AC009226.1
CREB1-1	chr2	207219664	207236066	ENSG00000224342	207173634	207222790	+	novel transcript	AC007879.1
CREB1-1	chr2	207219664	207236066	ENSG00000225064	207260445	207270690	+	long intergenic non-protein coding RNA 1802 [Source:HGNC Symbol;Acc:HGNC:52591]	LINC01802
CREB1-1	chr2	207219664	207236066	ENSG00000225916	207226949	207228308	+	novel transcript	AC007879.2
CREB1-1	chr2	207219664	207236066	ENSG00000229647	207239650	207245887	+
CREB1-1	chr2	207219664	207236066	ENSG00000234902	207186717	207236066	-	novel transcript	AC007879.3
CREB1-1	chr2	207219664	207236066	ENSG00000237892	207120884	207122044	-	KLF7 intronic transcript 1 [Source:HGNC Symbol;Acc:HGNC:41355]	KLF7-IT1
CREB1-1	chr2	207219664	207236066	ENSG00000240440	207235299	207237875	-	novel transcript	AC007879.4
CREB1-1	chr2	207219664	207236066	ENSG00000253008	207109987	207110073	-	microRNA 2355 [Source:HGNC Symbol;Acc:HGNC:38328]	MIR2355
CREB1-1	chr2	207219664	207236066	ENSG00000277590	207166400	207166498	+	microRNA 7845 [Source:HGNC Symbol;Acc:HGNC:50267]	MIR7845
CREB1-1	chr2	207219851	207260583	ENSG00000118263	207074137	207167267	-
CREB1-1	chr2	207219851	207260583	ENSG00000144410	206939554	206969474	+
CREB1-1	chr2	207219851	207260583	ENSG00000221628	207269275	207269424	-	microRNA 1302-4 [Source:HGNC Symbol;Acc:HGNC:35296]	MIR1302-4
CREB1-1	chr2	207219851	207260583	ENSG00000223725	207239864	207529795	-	novel transcript	AC009226.1
CREB1-1	chr2	207219851	207260583	ENSG00000224342	207173634	207222790	+	novel transcript	AC007879.1
CREB1-1	chr2	207219851	207260583	ENSG00000225064	207260445	207270690	+	long intergenic non-protein coding RNA 1802 [Source:HGNC Symbol;Acc:HGNC:52591]	LINC01802
CREB1-1	chr2	207219851	207260583	ENSG00000225916	207226949	207228308	+	novel transcript	AC007879.2
CREB1-1	chr2	207219851	207260583	ENSG00000229647	207239650	207245887	+
CREB1-1	chr2	207219851	207260583	ENSG00000234902	207186717	207236066	-	novel transcript	AC007879.3
CREB1-1	chr2	207219851	207260583	ENSG00000237892	207120884	207122044	-	KLF7 intronic transcript 1 [Source:HGNC Symbol;Acc:HGNC:41355]	KLF7-IT1
CREB1-1	chr2	207219851	207260583	ENSG00000240440	207235299	207237875	-	novel transcript	AC007879.4
CREB1-1	chr2	207219851	207260583	ENSG00000253008	207109987	207110073	-	microRNA 2355 [Source:HGNC Symbol;Acc:HGNC:38328]	MIR2355
CREB1-1	chr2	207219851	207260583	ENSG00000277590	207166400	207166498	+	microRNA 7845 [Source:HGNC Symbol;Acc:HGNC:50267]	MIR7845
CREB1-1	chr2	207234733	207529981	ENSG00000118260	207529737	207603431	+
CREB1-1	chr2	207234733	207529981	ENSG00000118260	207529737	207603431	+
CREB1-1	chr2	207234733	207529981	ENSG00000118263	207074137	207167267	-
CREB1-1	chr2	207234733	207529981	ENSG00000118263	207074137	207167267	-
CREB1-1	chr2	207234733	207529981	ENSG00000144401	207580631	207625928	-	methyltransferase like 21A [Source:HGNC Symbol;Acc:HGNC:30476]	METTL21A
CREB1-1	chr2	207234733	207529981	ENSG00000144410	206939554	206969474	+
CREB1-1	chr2	207234733	207529981	ENSG00000144410	206939554	206969474	+
CREB1-1	chr2	207234733	207529981	ENSG00000163249	207711540	207761839	+
CREB1-1	chr2	207234733	207529981	ENSG00000163249	207711540	207761839	+
CREB1-1	chr2	207234733	207529981	ENSG00000163251	207762586	207769563	-
CREB1-1	chr2	207234733	207529981	ENSG00000163251	207762586	207769563	-
CREB1-1	chr2	207234733	207529981	ENSG00000199251	207680533	207680639	-	RNA, U6 small nuclear 664, pseudogene [Source:HGNC Symbol;Acc:HGNC:47627]	RNU6-664P
CREB1-1	chr2	207234733	207529981	ENSG00000200764	207687960	207688059	+	Y RNA [Source:RFAM;Acc:RF00019]	Y_RNA
CREB1-1	chr2	207234733	207529981	ENSG00000213082	207681590	207682033	+	protein phosphatase 1 regulatory inhibitor subunit 14B pseudogene 2 [Source:HGNC Symbol;Acc:HGNC:16329]	PPP1R14BP2
CREB1-1	chr2	207234733	207529981	ENSG00000221628	207269275	207269424	-	microRNA 1302-4 [Source:HGNC Symbol;Acc:HGNC:35296]	MIR1302-4
CREB1-1	chr2	207234733	207529981	ENSG00000223433	207654781	207654951	+	ribosomal protein S29 pseudogene 9 [Source:HGNC Symbol;Acc:HGNC:36913]	RPS29P9
CREB1-1	chr2	207234733	207529981	ENSG00000223725	207239864	207529795	-	novel transcript	AC009226.1
CREB1-1	chr2	207234733	207529981	ENSG00000224137	207662375	207667024	+	long intergenic non-protein coding RNA 1857 [Source:HGNC Symbol;Acc:HGNC:52673]	LINC01857
CREB1-1	chr2	207234733	207529981	ENSG00000224342	207173634	207222790	+	novel transcript	AC007879.1
CREB1-1	chr2	207234733	207529981	ENSG00000225064	207260445	207270690	+	long intergenic non-protein coding RNA 1802 [Source:HGNC Symbol;Acc:HGNC:52591]	LINC01802
CREB1-1	chr2	207234733	207529981	ENSG00000225916	207226949	207228308	+	novel transcript	AC007879.2
CREB1-1	chr2	207234733	207529981	ENSG00000229647	207239650	207245887	+
CREB1-1	chr2	207234733	207529981	ENSG00000229647	207239650	207245887	+
CREB1-1	chr2	207234733	207529981	ENSG00000234902	207186717	207236066	-	novel transcript	AC007879.3
CREB1-1	chr2	207234733	207529981	ENSG00000237892	207120884	207122044	-	KLF7 intronic transcript 1 [Source:HGNC Symbol;Acc:HGNC:41355]	KLF7-IT1
CREB1-1	chr2	207234733	207529981	ENSG00000240440	207235299	207237875	-	novel transcript	AC007879.4
CREB1-1	chr2	207234733	207529981	ENSG00000253008	207109987	207110073	-	microRNA 2355 [Source:HGNC Symbol;Acc:HGNC:38328]	MIR2355
CREB1-1	chr2	207234733	207529981	ENSG00000272851	207753872	207754435	-	novel transcript	AC096772.1
CREB1-1	chr2	207234733	207529981	ENSG00000277590	207166400	207166498	+	microRNA 7845 [Source:HGNC Symbol;Acc:HGNC:50267]	MIR7845
CREB1-1	chr2	207234733	207529981	ENSG00000284079	207754807	207754881	+	microRNA 4775 [Source:HGNC Symbol;Acc:HGNC:41885]	MIR4775
CREB1-1	chr2	207240121	207529795	ENSG00000118260	207529737	207603431	+
CREB1-1	chr2	207240121	207529795	ENSG00000118263	207074137	207167267	-
CREB1-1	chr2	207240121	207529795	ENSG00000144401	207580631	207625928	-	methyltransferase like 21A [Source:HGNC Symbol;Acc:HGNC:30476]	METTL21A
CREB1-1	chr2	207240121	207529795	ENSG00000163249	207711540	207761839	+
CREB1-1	chr2	207240121	207529795	ENSG00000163251	207762586	207769563	-
CREB1-1	chr2	207240121	207529795	ENSG00000199251	207680533	207680639	-	RNA, U6 small nuclear 664, pseudogene [Source:HGNC Symbol;Acc:HGNC:47627]	RNU6-664P
CREB1-1	chr2	207240121	207529795	ENSG00000200764	207687960	207688059	+	Y RNA [Source:RFAM;Acc:RF00019]	Y_RNA
CREB1-1	chr2	207240121	207529795	ENSG00000213082	207681590	207682033	+	protein phosphatase 1 regulatory inhibitor subunit 14B pseudogene 2 [Source:HGNC Symbol;Acc:HGNC:16329]	PPP1R14BP2
CREB1-1	chr2	207240121	207529795	ENSG00000221628	207269275	207269424	-	microRNA 1302-4 [Source:HGNC Symbol;Acc:HGNC:35296]	MIR1302-4
CREB1-1	chr2	207240121	207529795	ENSG00000223433	207654781	207654951	+	ribosomal protein S29 pseudogene 9 [Source:HGNC Symbol;Acc:HGNC:36913]	RPS29P9
CREB1-1	chr2	207240121	207529795	ENSG00000223725	207239864	207529795	-	novel transcript	AC009226.1
CREB1-1	chr2	207240121	207529795	ENSG00000224137	207662375	207667024	+	long intergenic non-protein coding RNA 1857 [Source:HGNC Symbol;Acc:HGNC:52673]	LINC01857
CREB1-1	chr2	207240121	207529795	ENSG00000224342	207173634	207222790	+	novel transcript	AC007879.1
CREB1-1	chr2	207240121	207529795	ENSG00000225064	207260445	207270690	+	long intergenic non-protein coding RNA 1802 [Source:HGNC Symbol;Acc:HGNC:52591]	LINC01802
CREB1-1	chr2	207240121	207529795	ENSG00000225916	207226949	207228308	+	novel transcript	AC007879.2
CREB1-1	chr2	207240121	207529795	ENSG00000229647	207239650	207245887	+
CREB1-1	chr2	207240121	207529795	ENSG00000234902	207186717	207236066	-	novel transcript	AC007879.3
CREB1-1	chr2	207240121	207529795	ENSG00000237892	207120884	207122044	-	KLF7 intronic transcript 1 [Source:HGNC Symbol;Acc:HGNC:41355]	KLF7-IT1
CREB1-1	chr2	207240121	207529795	ENSG00000240440	207235299	207237875	-	novel transcript	AC007879.4
CREB1-1	chr2	207240121	207529795	ENSG00000253008	207109987	207110073	-	microRNA 2355 [Source:HGNC Symbol;Acc:HGNC:38328]	MIR2355
CREB1-1	chr2	207240121	207529795	ENSG00000272851	207753872	207754435	-	novel transcript	AC096772.1
CREB1-1	chr2	207240121	207529795	ENSG00000277590	207166400	207166498	+	microRNA 7845 [Source:HGNC Symbol;Acc:HGNC:50267]	MIR7845
CREB1-1	chr2	207240121	207529795	ENSG00000284079	207754807	207754881	+	microRNA 4775 [Source:HGNC Symbol;Acc:HGNC:41885]	MIR4775
CREB1-1	chr2	207240227	207529981	ENSG00000118260	207529737	207603431	+
CREB1-1	chr2	207240227	207529981	ENSG00000118263	207074137	207167267	-
CREB1-1	chr2	207240227	207529981	ENSG00000144401	207580631	207625928	-	methyltransferase like 21A [Source:HGNC Symbol;Acc:HGNC:30476]	METTL21A
CREB1-1	chr2	207240227	207529981	ENSG00000163249	207711540	207761839	+
CREB1-1	chr2	207240227	207529981	ENSG00000163251	207762586	207769563	-
CREB1-1	chr2	207240227	207529981	ENSG00000199251	207680533	207680639	-	RNA, U6 small nuclear 664, pseudogene [Source:HGNC Symbol;Acc:HGNC:47627]	RNU6-664P
CREB1-1	chr2	207240227	207529981	ENSG00000200764	207687960	207688059	+	Y RNA [Source:RFAM;Acc:RF00019]	Y_RNA
CREB1-1	chr2	207240227	207529981	ENSG00000213082	207681590	207682033	+	protein phosphatase 1 regulatory inhibitor subunit 14B pseudogene 2 [Source:HGNC Symbol;Acc:HGNC:16329]	PPP1R14BP2
CREB1-1	chr2	207240227	207529981	ENSG00000221628	207269275	207269424	-	microRNA 1302-4 [Source:HGNC Symbol;Acc:HGNC:35296]	MIR1302-4
CREB1-1	chr2	207240227	207529981	ENSG00000223433	207654781	207654951	+	ribosomal protein S29 pseudogene 9 [Source:HGNC Symbol;Acc:HGNC:36913]	RPS29P9
CREB1-1	chr2	207240227	207529981	ENSG00000223725	207239864	207529795	-	novel transcript	AC009226.1
CREB1-1	chr2	207240227	207529981	ENSG00000224137	207662375	207667024	+	long intergenic non-protein coding RNA 1857 [Source:HGNC Symbol;Acc:HGNC:52673]	LINC01857
CREB1-1	chr2	207240227	207529981	ENSG00000224342	207173634	207222790	+	novel transcript	AC007879.1
CREB1-1	chr2	207240227	207529981	ENSG00000225064	207260445	207270690	+	long intergenic non-protein coding RNA 1802 [Source:HGNC Symbol;Acc:HGNC:52591]	LINC01802
CREB1-1	chr2	207240227	207529981	ENSG00000225916	207226949	207228308	+	novel transcript	AC007879.2
CREB1-1	chr2	207240227	207529981	ENSG00000229647	207239650	207245887	+
CREB1-1	chr2	207240227	207529981	ENSG00000234902	207186717	207236066	-	novel transcript	AC007879.3
CREB1-1	chr2	207240227	207529981	ENSG00000237892	207120884	207122044	-	KLF7 intronic transcript 1 [Source:HGNC Symbol;Acc:HGNC:41355]	KLF7-IT1
CREB1-1	chr2	207240227	207529981	ENSG00000240440	207235299	207237875	-	novel transcript	AC007879.4
CREB1-1	chr2	207240227	207529981	ENSG00000253008	207109987	207110073	-	microRNA 2355 [Source:HGNC Symbol;Acc:HGNC:38328]	MIR2355
CREB1-1	chr2	207240227	207529981	ENSG00000272851	207753872	207754435	-	novel transcript	AC096772.1
CREB1-1	chr2	207240227	207529981	ENSG00000277590	207166400	207166498	+	microRNA 7845 [Source:HGNC Symbol;Acc:HGNC:50267]	MIR7845
CREB1-1	chr2	207240227	207529981	ENSG00000284079	207754807	207754881	+	microRNA 4775 [Source:HGNC Symbol;Acc:HGNC:41885]	MIR4775
CREB1-1	chr2	207325611	207529597	ENSG00000118260	207529737	207603431	+
CREB1-1	chr2	207325611	207529597	ENSG00000118263	207074137	207167267	-
CREB1-1	chr2	207325611	207529597	ENSG00000144401	207580631	207625928	-	methyltransferase like 21A [Source:HGNC Symbol;Acc:HGNC:30476]	METTL21A
CREB1-1	chr2	207325611	207529597	ENSG00000163249	207711540	207761839	+
CREB1-1	chr2	207325611	207529597	ENSG00000163251	207762586	207769563	-
CREB1-1	chr2	207325611	207529597	ENSG00000199251	207680533	207680639	-	RNA, U6 small nuclear 664, pseudogene [Source:HGNC Symbol;Acc:HGNC:47627]	RNU6-664P
CREB1-1	chr2	207325611	207529597	ENSG00000200764	207687960	207688059	+	Y RNA [Source:RFAM;Acc:RF00019]	Y_RNA
CREB1-1	chr2	207325611	207529597	ENSG00000213082	207681590	207682033	+	protein phosphatase 1 regulatory inhibitor subunit 14B pseudogene 2 [Source:HGNC Symbol;Acc:HGNC:16329]	PPP1R14BP2
CREB1-1	chr2	207325611	207529597	ENSG00000221628	207269275	207269424	-	microRNA 1302-4 [Source:HGNC Symbol;Acc:HGNC:35296]	MIR1302-4
CREB1-1	chr2	207325611	207529597	ENSG00000223433	207654781	207654951	+	ribosomal protein S29 pseudogene 9 [Source:HGNC Symbol;Acc:HGNC:36913]	RPS29P9
CREB1-1	chr2	207325611	207529597	ENSG00000223725	207239864	207529795	-	novel transcript	AC009226.1
CREB1-1	chr2	207325611	207529597	ENSG00000224137	207662375	207667024	+	long intergenic non-protein coding RNA 1857 [Source:HGNC Symbol;Acc:HGNC:52673]	LINC01857
CREB1-1	chr2	207325611	207529597	ENSG00000224342	207173634	207222790	+	novel transcript	AC007879.1
CREB1-1	chr2	207325611	207529597	ENSG00000225064	207260445	207270690	+	long intergenic non-protein coding RNA 1802 [Source:HGNC Symbol;Acc:HGNC:52591]	LINC01802
CREB1-1	chr2	207325611	207529597	ENSG00000225916	207226949	207228308	+	novel transcript	AC007879.2
CREB1-1	chr2	207325611	207529597	ENSG00000229647	207239650	207245887	+
CREB1-1	chr2	207325611	207529597	ENSG00000234902	207186717	207236066	-	novel transcript	AC007879.3
CREB1-1	chr2	207325611	207529597	ENSG00000237892	207120884	207122044	-	KLF7 intronic transcript 1 [Source:HGNC Symbol;Acc:HGNC:41355]	KLF7-IT1
CREB1-1	chr2	207325611	207529597	ENSG00000240440	207235299	207237875	-	novel transcript	AC007879.4
CREB1-1	chr2	207325611	207529597	ENSG00000253008	207109987	207110073	-	microRNA 2355 [Source:HGNC Symbol;Acc:HGNC:38328]	MIR2355
CREB1-1	chr2	207325611	207529597	ENSG00000272851	207753872	207754435	-	novel transcript	AC096772.1
CREB1-1	chr2	207325611	207529597	ENSG00000277590	207166400	207166498	+	microRNA 7845 [Source:HGNC Symbol;Acc:HGNC:50267]	MIR7845
CREB1-1	chr2	207325611	207529597	ENSG00000284079	207754807	207754881	+	microRNA 4775 [Source:HGNC Symbol;Acc:HGNC:41885]	MIR4775
CREB1-1	chr2	207327890	207529791	ENSG00000118260	207529737	207603431	+
CREB1-1	chr2	207327890	207529791	ENSG00000118263	207074137	207167267	-
CREB1-1	chr2	207327890	207529791	ENSG00000144401	207580631	207625928	-	methyltransferase like 21A [Source:HGNC Symbol;Acc:HGNC:30476]	METTL21A
CREB1-1	chr2	207327890	207529791	ENSG00000163249	207711540	207761839	+
CREB1-1	chr2	207327890	207529791	ENSG00000163251	207762586	207769563	-
CREB1-1	chr2	207327890	207529791	ENSG00000199251	207680533	207680639	-	RNA, U6 small nuclear 664, pseudogene [Source:HGNC Symbol;Acc:HGNC:47627]	RNU6-664P
CREB1-1	chr2	207327890	207529791	ENSG00000200764	207687960	207688059	+	Y RNA [Source:RFAM;Acc:RF00019]	Y_RNA
CREB1-1	chr2	207327890	207529791	ENSG00000213082	207681590	207682033	+	protein phosphatase 1 regulatory inhibitor subunit 14B pseudogene 2 [Source:HGNC Symbol;Acc:HGNC:16329]	PPP1R14BP2
CREB1-1	chr2	207327890	207529791	ENSG00000221628	207269275	207269424	-	microRNA 1302-4 [Source:HGNC Symbol;Acc:HGNC:35296]	MIR1302-4
CREB1-1	chr2	207327890	207529791	ENSG00000223433	207654781	207654951	+	ribosomal protein S29 pseudogene 9 [Source:HGNC Symbol;Acc:HGNC:36913]	RPS29P9
CREB1-1	chr2	207327890	207529791	ENSG00000223725	207239864	207529795	-	novel transcript	AC009226.1
CREB1-1	chr2	207327890	207529791	ENSG00000224137	207662375	207667024	+	long intergenic non-protein coding RNA 1857 [Source:HGNC Symbol;Acc:HGNC:52673]	LINC01857
CREB1-1	chr2	207327890	207529791	ENSG00000224342	207173634	207222790	+	novel transcript	AC007879.1
CREB1-1	chr2	207327890	207529791	ENSG00000225064	207260445	207270690	+	long intergenic non-protein coding RNA 1802 [Source:HGNC Symbol;Acc:HGNC:52591]	LINC01802
CREB1-1	chr2	207327890	207529791	ENSG00000225916	207226949	207228308	+	novel transcript	AC007879.2
CREB1-1	chr2	207327890	207529791	ENSG00000229647	207239650	207245887	+
CREB1-1	chr2	207327890	207529791	ENSG00000234902	207186717	207236066	-	novel transcript	AC007879.3
CREB1-1	chr2	207327890	207529791	ENSG00000237892	207120884	207122044	-	KLF7 intronic transcript 1 [Source:HGNC Symbol;Acc:HGNC:41355]	KLF7-IT1
CREB1-1	chr2	207327890	207529791	ENSG00000240440	207235299	207237875	-	novel transcript	AC007879.4
CREB1-1	chr2	207327890	207529791	ENSG00000253008	207109987	207110073	-	microRNA 2355 [Source:HGNC Symbol;Acc:HGNC:38328]	MIR2355
CREB1-1	chr2	207327890	207529791	ENSG00000272851	207753872	207754435	-	novel transcript	AC096772.1
CREB1-1	chr2	207327890	207529791	ENSG00000277590	207166400	207166498	+	microRNA 7845 [Source:HGNC Symbol;Acc:HGNC:50267]	MIR7845
CREB1-1	chr2	207327890	207529791	ENSG00000284079	207754807	207754881	+	microRNA 4775 [Source:HGNC Symbol;Acc:HGNC:41885]	MIR4775
CREB1-1	chr2	207403738	207529597	ENSG00000118260	207529737	207603431	+
CREB1-1	chr2	207403738	207529597	ENSG00000144401	207580631	207625928	-	methyltransferase like 21A [Source:HGNC Symbol;Acc:HGNC:30476]	METTL21A
CREB1-1	chr2	207403738	207529597	ENSG00000163249	207711540	207761839	+
CREB1-1	chr2	207403738	207529597	ENSG00000163251	207762586	207769563	-
CREB1-1	chr2	207403738	207529597	ENSG00000199251	207680533	207680639	-	RNA, U6 small nuclear 664, pseudogene [Source:HGNC Symbol;Acc:HGNC:47627]	RNU6-664P
CREB1-1	chr2	207403738	207529597	ENSG00000200764	207687960	207688059	+	Y RNA [Source:RFAM;Acc:RF00019]	Y_RNA
CREB1-1	chr2	207403738	207529597	ENSG00000213082	207681590	207682033	+	protein phosphatase 1 regulatory inhibitor subunit 14B pseudogene 2 [Source:HGNC Symbol;Acc:HGNC:16329]	PPP1R14BP2
CREB1-1	chr2	207403738	207529597	ENSG00000221628	207269275	207269424	-	microRNA 1302-4 [Source:HGNC Symbol;Acc:HGNC:35296]	MIR1302-4
CREB1-1	chr2	207403738	207529597	ENSG00000223433	207654781	207654951	+	ribosomal protein S29 pseudogene 9 [Source:HGNC Symbol;Acc:HGNC:36913]	RPS29P9
CREB1-1	chr2	207403738	207529597	ENSG00000223725	207239864	207529795	-	novel transcript	AC009226.1
CREB1-1	chr2	207403738	207529597	ENSG00000224137	207662375	207667024	+	long intergenic non-protein coding RNA 1857 [Source:HGNC Symbol;Acc:HGNC:52673]	LINC01857
CREB1-1	chr2	207403738	207529597	ENSG00000224342	207173634	207222790	+	novel transcript	AC007879.1
CREB1-1	chr2	207403738	207529597	ENSG00000225064	207260445	207270690	+	long intergenic non-protein coding RNA 1802 [Source:HGNC Symbol;Acc:HGNC:52591]	LINC01802
CREB1-1	chr2	207403738	207529597	ENSG00000225916	207226949	207228308	+	novel transcript	AC007879.2
CREB1-1	chr2	207403738	207529597	ENSG00000229647	207239650	207245887	+
CREB1-1	chr2	207403738	207529597	ENSG00000234902	207186717	207236066	-	novel transcript	AC007879.3
CREB1-1	chr2	207403738	207529597	ENSG00000237892	207120884	207122044	-	KLF7 intronic transcript 1 [Source:HGNC Symbol;Acc:HGNC:41355]	KLF7-IT1
CREB1-1	chr2	207403738	207529597	ENSG00000240440	207235299	207237875	-	novel transcript	AC007879.4
CREB1-1	chr2	207403738	207529597	ENSG00000253008	207109987	207110073	-	microRNA 2355 [Source:HGNC Symbol;Acc:HGNC:38328]	MIR2355
CREB1-1	chr2	207403738	207529597	ENSG00000272851	207753872	207754435	-	novel transcript	AC096772.1
CREB1-1	chr2	207403738	207529597	ENSG00000277590	207166400	207166498	+	microRNA 7845 [Source:HGNC Symbol;Acc:HGNC:50267]	MIR7845
CREB1-1	chr2	207403738	207529597	ENSG00000284079	207754807	207754881	+	microRNA 4775 [Source:HGNC Symbol;Acc:HGNC:41885]	MIR4775
CREB1-1	chr2	207519808	207529773	ENSG00000118260	207529737	207603431	+
CREB1-1	chr2	207519808	207529773	ENSG00000144401	207580631	207625928	-	methyltransferase like 21A [Source:HGNC Symbol;Acc:HGNC:30476]	METTL21A
CREB1-1	chr2	207519808	207529773	ENSG00000163249	207711540	207761839	+
CREB1-1	chr2	207519808	207529773	ENSG00000163251	207762586	207769563	-
CREB1-1	chr2	207519808	207529773	ENSG00000199251	207680533	207680639	-	RNA, U6 small nuclear 664, pseudogene [Source:HGNC Symbol;Acc:HGNC:47627]	RNU6-664P
CREB1-1	chr2	207519808	207529773	ENSG00000200764	207687960	207688059	+	Y RNA [Source:RFAM;Acc:RF00019]	Y_RNA
CREB1-1	chr2	207519808	207529773	ENSG00000213082	207681590	207682033	+	protein phosphatase 1 regulatory inhibitor subunit 14B pseudogene 2 [Source:HGNC Symbol;Acc:HGNC:16329]	PPP1R14BP2
CREB1-1	chr2	207519808	207529773	ENSG00000221628	207269275	207269424	-	microRNA 1302-4 [Source:HGNC Symbol;Acc:HGNC:35296]	MIR1302-4
CREB1-1	chr2	207519808	207529773	ENSG00000223433	207654781	207654951	+	ribosomal protein S29 pseudogene 9 [Source:HGNC Symbol;Acc:HGNC:36913]	RPS29P9
CREB1-1	chr2	207519808	207529773	ENSG00000223725	207239864	207529795	-	novel transcript	AC009226.1
CREB1-1	chr2	207519808	207529773	ENSG00000224137	207662375	207667024	+	long intergenic non-protein coding RNA 1857 [Source:HGNC Symbol;Acc:HGNC:52673]	LINC01857
CREB1-1	chr2	207519808	207529773	ENSG00000225064	207260445	207270690	+	long intergenic non-protein coding RNA 1802 [Source:HGNC Symbol;Acc:HGNC:52591]	LINC01802
CREB1-1	chr2	207519808	207529773	ENSG00000225916	207226949	207228308	+	novel transcript	AC007879.2
CREB1-1	chr2	207519808	207529773	ENSG00000229647	207239650	207245887	+
CREB1-1	chr2	207519808	207529773	ENSG00000240440	207235299	207237875	-	novel transcript	AC007879.4
CREB1-1	chr2	207519808	207529773	ENSG00000272851	207753872	207754435	-	novel transcript	AC096772.1
CREB1-1	chr2	207519808	207529773	ENSG00000284079	207754807	207754881	+	microRNA 4775 [Source:HGNC Symbol;Acc:HGNC:41885]	MIR4775
DAZ4-1	chrY	24899939	24903806	ENSG00000183795	24607560	24639207	+	basic charge Y-linked 2B [Source:HGNC Symbol;Acc:HGNC:25449]	BPY2B
DAZ4-1	chrY	24899939	24903806	ENSG00000185894	25030901	25062548	-	basic charge Y-linked 2C [Source:HGNC Symbol;Acc:HGNC:18225]	BPY2C
DAZ4-1	chrY	24899939	24903806	ENSG00000187191	24763069	24813492	-	deleted in azoospermia 3 [Source:HGNC Symbol;Acc:HGNC:15965]	DAZ3
DAZ4-1	chrY	24899939	24903806	ENSG00000205916	24833843	24907040	+	deleted in azoospermia 4 [Source:HGNC Symbol;Acc:HGNC:15966]	DAZ4
DAZ4-1	chrY	24899939	24903806	ENSG00000223641	25183643	25184773	-
DAZ4-1	chrY	24899939	24903806	ENSG00000223978	24985201	24986476	-	zinc finger protein 736 pseudogene 1, Y-linked [Source:HGNC Symbol;Acc:HGNC:37726]	ZNF736P1Y
DAZ4-1	chrY	24899939	24903806	ENSG00000226270	24683657	24684935	+	zinc finger protein 736 pseudogene 2, Y-linked [Source:HGNC Symbol;Acc:HGNC:37727]	ZNF736P2Y
DAZ4-1	chrY	24899939	24903806	ENSG00000227837	24691791	24692932	+	tripartite motif containing 60 pseudogene 11, Y-linked [Source:HGNC Symbol;Acc:HGNC:38463]	TRIM60P11Y
DAZ4-1	chrY	24899939	24903806	ENSG00000228296	25063083	25099892	-	testis-specific transcript, Y-linked 4C [Source:HGNC Symbol;Acc:HGNC:31892]	TTTY4C
DAZ4-1	chrY	24899939	24903806	ENSG00000230819	25018499	25019303	-	zinc finger protein 736 pseudogene 5, Y-linked [Source:HGNC Symbol;Acc:HGNC:38597]	ZNF736P5Y
DAZ4-1	chrY	24899939	24903806	ENSG00000232976	24659337	24660406	+	tripartite motif containing 60 pseudogene 10, Y-linked [Source:HGNC Symbol;Acc:HGNC:38462]	TRIM60P10Y
DAZ4-1	chrY	24899939	24903806	ENSG00000236379	25168599	25169841	+	zinc finger protein 736 pseudogene 4, Y-linked [Source:HGNC Symbol;Acc:HGNC:38464]	ZNF736P4Y
DAZ4-1	chrY	24899939	24903806	ENSG00000240566	24650808	24651534	+	zinc finger protein pseudogene	AC010153.1
DAZ4-1	chrY	24899939	24903806	ENSG00000274899	25174520	25175237	+	tripartite motif containing 60 (TRIM60) pseudogene	AC006386.1
DAZ4-1	chrY	24899939	24903806	ENSG00000278197	25009700	25010769	-	tripartite motif containing 60 (TRIM60) pseudogene	AC006338.1
DAZ4-1	chrY	24899939	24903806	ENSG00000278602	24977176	24978317	-	tripartite motif containing 60 (TRIM60) pseudogene	AC006338.2
DEFB1-1	chr8	6835523	6870604	ENSG00000155189	6708357	6759666	+
DEFB1-1	chr8	6835523	6870604	ENSG00000164816	7055304	7056734	-
DEFB1-1	chr8	6835523	6870604	ENSG00000164821	6935822	6938338	-
DEFB1-1	chr8	6835523	6870604	ENSG00000164822	6924693	6926076	-
DEFB1-1	chr8	6835523	6870604	ENSG00000164825	6870575	6878022	-
DEFB1-1	chr8	6835523	6870604	ENSG00000206042	7038571	7039439	-	defensin alpha 7, pseudogene [Source:HGNC Symbol;Acc:HGNC:31798]	DEFA7P
DEFB1-1	chr8	6835523	6870604	ENSG00000206047	6977649	6980080	-	defensin alpha 1 [Source:HGNC Symbol;Acc:HGNC:2761]	DEFA1
DEFB1-1	chr8	6835523	6870604	ENSG00000215378	6987178	6989721	-	defensin theta 1, pseudogene [Source:HGNC Symbol;Acc:HGNC:18339]	DEFT1P
DEFB1-1	chr8	6835523	6870604	ENSG00000223629	6950726	6951599	-	defensin alpha 8, pseudogene [Source:HGNC Symbol;Acc:HGNC:31799]	DEFA8P
DEFB1-1	chr8	6835523	6870604	ENSG00000228744	7122857	7123704	+	RPS3A pseudogene 30 [Source:HGNC Symbol;Acc:HGNC:35538]	RPS3AP30
DEFB1-1	chr8	6835523	6870604	ENSG00000232039	7006293	7007389	-	defensin theta 1, pseudogene 2 [Source:HGNC Symbol;Acc:HGNC:33599]	DEFT1P2
DEFB1-1	chr8	6835523	6870604	ENSG00000233238	6959289	6960161	-	defensin alpha 9, pseudogene [Source:HGNC Symbol;Acc:HGNC:31800]	DEFA9P
DEFB1-1	chr8	6835523	6870604	ENSG00000233531	6968141	6969113	-	defensin alpha 10, pseudogene [Source:HGNC Symbol;Acc:HGNC:31801]	DEFA10P
DEFB1-1	chr8	6835523	6870604	ENSG00000234120	7112314	7113728	-	Ribosomal protein S24 pseudogene	AF228730.2
DEFB1-1	chr8	6835523	6870604	ENSG00000234178	7028641	7029489	-	defensin alpha 11, pseudogene [Source:HGNC Symbol;Acc:HGNC:33354]	DEFA11P
DEFB1-1	chr8	6835523	6870604	ENSG00000239839	7015869	7018301	-
DEFB1-1	chr8	6835523	6870604	ENSG00000240247	6996766	6999195	-	defensin alpha 1B [Source:HGNC Symbol;Acc:HGNC:33596]	DEFA1B
DEFB1-1	chr8	6835523	6870604	ENSG00000245857	6835554	6885276	+
DEFB1-1	chr8	6835523	6870604	ENSG00000249898	6618475	6708209	-
DEFB1-1	chr8	6835523	6870604	ENSG00000250752	6898878	6899468	-	ribosomal protein L23a pseudogene 96 [Source:HGNC Symbol;Acc:HGNC:51631]	RPL23AP96
DEFB1-1	chr8	6835523	6870604	ENSG00000254625	6928608	6930473	+	novel transcript	AF233439.1
DEFB1-1	chr8	6835523	6870604	ENSG00000254683	7143632	7143841	-	small nuclear ribonucleoprotein polypeptide C pseudogene 6 [Source:HGNC Symbol;Acc:HGNC:49821]	SNRPCP6
DEFB1-1	chr8	6835523	6870604	ENSG00000255273	7082971	7083328	+	chromosome 11 open reading frame 2 (C11orf2) pseudogene	AF238378.1
DEFB1-1	chr8	6835523	6870604	ENSG00000266038	6745164	6745244	+	microRNA 4659a [Source:HGNC Symbol;Acc:HGNC:41857]	MIR4659A
DEFB1-1	chr8	6835523	6870604	ENSG00000271743	6615604	6617198	-	novel transcript	AF287957.1
DEFB1-1	chr8	6835523	6870604	ENSG00000275591	6808517	6835644	-
DEFB1-1	chr8	6835523	6870604	ENSG00000276580	6622124	6622220	-	microRNA 8055 [Source:HGNC Symbol;Acc:HGNC:50241]	MIR8055
DEFB1-1	chr8	6835523	6870604	ENSG00000283386	6745168	6745240	-	microRNA 4659b [Source:HGNC Symbol;Acc:HGNC:41530]	MIR4659B
DEFB1-1	chr8	6835523	6885276	ENSG00000155189	6708357	6759666	+
DEFB1-1	chr8	6835523	6885276	ENSG00000164816	7055304	7056734	-
DEFB1-1	chr8	6835523	6885276	ENSG00000164821	6935822	6938338	-
DEFB1-1	chr8	6835523	6885276	ENSG00000164822	6924693	6926076	-
DEFB1-1	chr8	6835523	6885276	ENSG00000164825	6870575	6878022	-
DEFB1-1	chr8	6835523	6885276	ENSG00000206042	7038571	7039439	-	defensin alpha 7, pseudogene [Source:HGNC Symbol;Acc:HGNC:31798]	DEFA7P
DEFB1-1	chr8	6835523	6885276	ENSG00000206047	6977649	6980080	-	defensin alpha 1 [Source:HGNC Symbol;Acc:HGNC:2761]	DEFA1
DEFB1-1	chr8	6835523	6885276	ENSG00000215378	6987178	6989721	-	defensin theta 1, pseudogene [Source:HGNC Symbol;Acc:HGNC:18339]	DEFT1P
DEFB1-1	chr8	6835523	6885276	ENSG00000223629	6950726	6951599	-	defensin alpha 8, pseudogene [Source:HGNC Symbol;Acc:HGNC:31799]	DEFA8P
DEFB1-1	chr8	6835523	6885276	ENSG00000228744	7122857	7123704	+	RPS3A pseudogene 30 [Source:HGNC Symbol;Acc:HGNC:35538]	RPS3AP30
DEFB1-1	chr8	6835523	6885276	ENSG00000230106	7170550	7170741	+	small nuclear ribonucleoprotein polypeptide C pseudogene 15 [Source:HGNC Symbol;Acc:HGNC:49830]	SNRPCP15
DEFB1-1	chr8	6835523	6885276	ENSG00000232039	7006293	7007389	-	defensin theta 1, pseudogene 2 [Source:HGNC Symbol;Acc:HGNC:33599]	DEFT1P2
DEFB1-1	chr8	6835523	6885276	ENSG00000233238	6959289	6960161	-	defensin alpha 9, pseudogene [Source:HGNC Symbol;Acc:HGNC:31800]	DEFA9P
DEFB1-1	chr8	6835523	6885276	ENSG00000233531	6968141	6969113	-	defensin alpha 10, pseudogene [Source:HGNC Symbol;Acc:HGNC:31801]	DEFA10P
DEFB1-1	chr8	6835523	6885276	ENSG00000234120	7112314	7113728	-	Ribosomal protein S24 pseudogene	AF228730.2
DEFB1-1	chr8	6835523	6885276	ENSG00000234178	7028641	7029489	-	defensin alpha 11, pseudogene [Source:HGNC Symbol;Acc:HGNC:33354]	DEFA11P
DEFB1-1	chr8	6835523	6885276	ENSG00000239839	7015869	7018301	-
DEFB1-1	chr8	6835523	6885276	ENSG00000240247	6996766	6999195	-	defensin alpha 1B [Source:HGNC Symbol;Acc:HGNC:33596]	DEFA1B
DEFB1-1	chr8	6835523	6885276	ENSG00000245857	6835554	6885276	+
DEFB1-1	chr8	6835523	6885276	ENSG00000249898	6618475	6708209	-
DEFB1-1	chr8	6835523	6885276	ENSG00000250752	6898878	6899468	-	ribosomal protein L23a pseudogene 96 [Source:HGNC Symbol;Acc:HGNC:51631]	RPL23AP96
DEFB1-1	chr8	6835523	6885276	ENSG00000254625	6928608	6930473	+	novel transcript	AF233439.1
DEFB1-1	chr8	6835523	6885276	ENSG00000254683	7143632	7143841	-	small nuclear ribonucleoprotein polypeptide C pseudogene 6 [Source:HGNC Symbol;Acc:HGNC:49821]	SNRPCP6
DEFB1-1	chr8	6835523	6885276	ENSG00000255273	7082971	7083328	+	chromosome 11 open reading frame 2 (C11orf2) pseudogene	AF238378.1
DEFB1-1	chr8	6835523	6885276	ENSG00000266038	6745164	6745244	+	microRNA 4659a [Source:HGNC Symbol;Acc:HGNC:41857]	MIR4659A
DEFB1-1	chr8	6835523	6885276	ENSG00000271743	6615604	6617198	-	novel transcript	AF287957.1
DEFB1-1	chr8	6835523	6885276	ENSG00000275591	6808517	6835644	-
DEFB1-1	chr8	6835523	6885276	ENSG00000276580	6622124	6622220	-	microRNA 8055 [Source:HGNC Symbol;Acc:HGNC:50241]	MIR8055
DEFB1-1	chr8	6835523	6885276	ENSG00000283386	6745168	6745240	-	microRNA 4659b [Source:HGNC Symbol;Acc:HGNC:41530]	MIR4659B
DEFB1-1	chr8	6835558	6870355	ENSG00000155189	6708357	6759666	+
DEFB1-1	chr8	6835558	6870355	ENSG00000164816	7055304	7056734	-
DEFB1-1	chr8	6835558	6870355	ENSG00000164821	6935822	6938338	-
DEFB1-1	chr8	6835558	6870355	ENSG00000164822	6924693	6926076	-
DEFB1-1	chr8	6835558	6870355	ENSG00000164825	6870575	6878022	-
DEFB1-1	chr8	6835558	6870355	ENSG00000206042	7038571	7039439	-	defensin alpha 7, pseudogene [Source:HGNC Symbol;Acc:HGNC:31798]	DEFA7P
DEFB1-1	chr8	6835558	6870355	ENSG00000206047	6977649	6980080	-	defensin alpha 1 [Source:HGNC Symbol;Acc:HGNC:2761]	DEFA1
DEFB1-1	chr8	6835558	6870355	ENSG00000215378	6987178	6989721	-	defensin theta 1, pseudogene [Source:HGNC Symbol;Acc:HGNC:18339]	DEFT1P
DEFB1-1	chr8	6835558	6870355	ENSG00000223629	6950726	6951599	-	defensin alpha 8, pseudogene [Source:HGNC Symbol;Acc:HGNC:31799]	DEFA8P
DEFB1-1	chr8	6835558	6870355	ENSG00000228744	7122857	7123704	+	RPS3A pseudogene 30 [Source:HGNC Symbol;Acc:HGNC:35538]	RPS3AP30
DEFB1-1	chr8	6835558	6870355	ENSG00000232039	7006293	7007389	-	defensin theta 1, pseudogene 2 [Source:HGNC Symbol;Acc:HGNC:33599]	DEFT1P2
DEFB1-1	chr8	6835558	6870355	ENSG00000233238	6959289	6960161	-	defensin alpha 9, pseudogene [Source:HGNC Symbol;Acc:HGNC:31800]	DEFA9P
DEFB1-1	chr8	6835558	6870355	ENSG00000233531	6968141	6969113	-	defensin alpha 10, pseudogene [Source:HGNC Symbol;Acc:HGNC:31801]	DEFA10P
DEFB1-1	chr8	6835558	6870355	ENSG00000234120	7112314	7113728	-	Ribosomal protein S24 pseudogene	AF228730.2
DEFB1-1	chr8	6835558	6870355	ENSG00000234178	7028641	7029489	-	defensin alpha 11, pseudogene [Source:HGNC Symbol;Acc:HGNC:33354]	DEFA11P
DEFB1-1	chr8	6835558	6870355	ENSG00000239839	7015869	7018301	-
DEFB1-1	chr8	6835558	6870355	ENSG00000240247	6996766	6999195	-	defensin alpha 1B [Source:HGNC Symbol;Acc:HGNC:33596]	DEFA1B
DEFB1-1	chr8	6835558	6870355	ENSG00000245857	6835554	6885276	+
DEFB1-1	chr8	6835558	6870355	ENSG00000249898	6618475	6708209	-
DEFB1-1	chr8	6835558	6870355	ENSG00000250752	6898878	6899468	-	ribosomal protein L23a pseudogene 96 [Source:HGNC Symbol;Acc:HGNC:51631]	RPL23AP96
DEFB1-1	chr8	6835558	6870355	ENSG00000254625	6928608	6930473	+	novel transcript	AF233439.1
DEFB1-1	chr8	6835558	6870355	ENSG00000254683	7143632	7143841	-	small nuclear ribonucleoprotein polypeptide C pseudogene 6 [Source:HGNC Symbol;Acc:HGNC:49821]	SNRPCP6
DEFB1-1	chr8	6835558	6870355	ENSG00000255273	7082971	7083328	+	chromosome 11 open reading frame 2 (C11orf2) pseudogene	AF238378.1
DEFB1-1	chr8	6835558	6870355	ENSG00000266038	6745164	6745244	+	microRNA 4659a [Source:HGNC Symbol;Acc:HGNC:41857]	MIR4659A
DEFB1-1	chr8	6835558	6870355	ENSG00000271743	6615604	6617198	-	novel transcript	AF287957.1
DEFB1-1	chr8	6835558	6870355	ENSG00000275591	6808517	6835644	-
DEFB1-1	chr8	6835558	6870355	ENSG00000276580	6622124	6622220	-	microRNA 8055 [Source:HGNC Symbol;Acc:HGNC:50241]	MIR8055
DEFB1-1	chr8	6835558	6870355	ENSG00000283386	6745168	6745240	-	microRNA 4659b [Source:HGNC Symbol;Acc:HGNC:41530]	MIR4659B
DEFB1-1	chr8	6835558	6870635	ENSG00000155189	6708357	6759666	+
DEFB1-1	chr8	6835558	6870635	ENSG00000155189	6708357	6759666	+
DEFB1-1	chr8	6835558	6870635	ENSG00000164816	7055304	7056734	-
DEFB1-1	chr8	6835558	6870635	ENSG00000164816	7055304	7056734	-
DEFB1-1	chr8	6835558	6870635	ENSG00000164821	6935822	6938338	-
DEFB1-1	chr8	6835558	6870635	ENSG00000164821	6935822	6938338	-
DEFB1-1	chr8	6835558	6870635	ENSG00000164822	6924693	6926076	-
DEFB1-1	chr8	6835558	6870635	ENSG00000164822	6924693	6926076	-
DEFB1-1	chr8	6835558	6870635	ENSG00000164825	6870575	6878022	-
DEFB1-1	chr8	6835558	6870635	ENSG00000164825	6870575	6878022	-
DEFB1-1	chr8	6835558	6870635	ENSG00000206042	7038571	7039439	-	defensin alpha 7, pseudogene [Source:HGNC Symbol;Acc:HGNC:31798]	DEFA7P
DEFB1-1	chr8	6835558	6870635	ENSG00000206047	6977649	6980080	-	defensin alpha 1 [Source:HGNC Symbol;Acc:HGNC:2761]	DEFA1
DEFB1-1	chr8	6835558	6870635	ENSG00000215378	6987178	6989721	-	defensin theta 1, pseudogene [Source:HGNC Symbol;Acc:HGNC:18339]	DEFT1P
DEFB1-1	chr8	6835558	6870635	ENSG00000223629	6950726	6951599	-	defensin alpha 8, pseudogene [Source:HGNC Symbol;Acc:HGNC:31799]	DEFA8P
DEFB1-1	chr8	6835558	6870635	ENSG00000228744	7122857	7123704	+	RPS3A pseudogene 30 [Source:HGNC Symbol;Acc:HGNC:35538]	RPS3AP30
DEFB1-1	chr8	6835558	6870635	ENSG00000232039	7006293	7007389	-	defensin theta 1, pseudogene 2 [Source:HGNC Symbol;Acc:HGNC:33599]	DEFT1P2
DEFB1-1	chr8	6835558	6870635	ENSG00000233238	6959289	6960161	-	defensin alpha 9, pseudogene [Source:HGNC Symbol;Acc:HGNC:31800]	DEFA9P
DEFB1-1	chr8	6835558	6870635	ENSG00000233531	6968141	6969113	-	defensin alpha 10, pseudogene [Source:HGNC Symbol;Acc:HGNC:31801]	DEFA10P
DEFB1-1	chr8	6835558	6870635	ENSG00000234120	7112314	7113728	-	Ribosomal protein S24 pseudogene	AF228730.2
DEFB1-1	chr8	6835558	6870635	ENSG00000234178	7028641	7029489	-	defensin alpha 11, pseudogene [Source:HGNC Symbol;Acc:HGNC:33354]	DEFA11P
DEFB1-1	chr8	6835558	6870635	ENSG00000239839	7015869	7018301	-
DEFB1-1	chr8	6835558	6870635	ENSG00000239839	7015869	7018301	-
DEFB1-1	chr8	6835558	6870635	ENSG00000240247	6996766	6999195	-	defensin alpha 1B [Source:HGNC Symbol;Acc:HGNC:33596]	DEFA1B
DEFB1-1	chr8	6835558	6870635	ENSG00000245857	6835554	6885276	+
DEFB1-1	chr8	6835558	6870635	ENSG00000245857	6835554	6885276	+
DEFB1-1	chr8	6835558	6870635	ENSG00000249898	6618475	6708209	-
DEFB1-1	chr8	6835558	6870635	ENSG00000249898	6618475	6708209	-
DEFB1-1	chr8	6835558	6870635	ENSG00000250752	6898878	6899468	-	ribosomal protein L23a pseudogene 96 [Source:HGNC Symbol;Acc:HGNC:51631]	RPL23AP96
DEFB1-1	chr8	6835558	6870635	ENSG00000254625	6928608	6930473	+	novel transcript	AF233439.1
DEFB1-1	chr8	6835558	6870635	ENSG00000254683	7143632	7143841	-	small nuclear ribonucleoprotein polypeptide C pseudogene 6 [Source:HGNC Symbol;Acc:HGNC:49821]	SNRPCP6
DEFB1-1	chr8	6835558	6870635	ENSG00000255273	7082971	7083328	+	chromosome 11 open reading frame 2 (C11orf2) pseudogene	AF238378.1
DEFB1-1	chr8	6835558	6870635	ENSG00000266038	6745164	6745244	+	microRNA 4659a [Source:HGNC Symbol;Acc:HGNC:41857]	MIR4659A
DEFB1-1	chr8	6835558	6870635	ENSG00000271743	6615604	6617198	-	novel transcript	AF287957.1
DEFB1-1	chr8	6835558	6870635	ENSG00000275591	6808517	6835644	-
DEFB1-1	chr8	6835558	6870635	ENSG00000275591	6808517	6835644	-
DEFB1-1	chr8	6835558	6870635	ENSG00000276580	6622124	6622220	-	microRNA 8055 [Source:HGNC Symbol;Acc:HGNC:50241]	MIR8055
DEFB1-1	chr8	6835558	6870635	ENSG00000283386	6745168	6745240	-	microRNA 4659b [Source:HGNC Symbol;Acc:HGNC:41530]	MIR4659B
DEFB1-1	chr8	6835558	6873388	ENSG00000155189	6708357	6759666	+
DEFB1-1	chr8	6835558	6873388	ENSG00000164816	7055304	7056734	-
DEFB1-1	chr8	6835558	6873388	ENSG00000164821	6935822	6938338	-
DEFB1-1	chr8	6835558	6873388	ENSG00000164822	6924693	6926076	-
DEFB1-1	chr8	6835558	6873388	ENSG00000164825	6870575	6878022	-
DEFB1-1	chr8	6835558	6873388	ENSG00000206042	7038571	7039439	-	defensin alpha 7, pseudogene [Source:HGNC Symbol;Acc:HGNC:31798]	DEFA7P
DEFB1-1	chr8	6835558	6873388	ENSG00000206047	6977649	6980080	-	defensin alpha 1 [Source:HGNC Symbol;Acc:HGNC:2761]	DEFA1
DEFB1-1	chr8	6835558	6873388	ENSG00000215378	6987178	6989721	-	defensin theta 1, pseudogene [Source:HGNC Symbol;Acc:HGNC:18339]	DEFT1P
DEFB1-1	chr8	6835558	6873388	ENSG00000223629	6950726	6951599	-	defensin alpha 8, pseudogene [Source:HGNC Symbol;Acc:HGNC:31799]	DEFA8P
DEFB1-1	chr8	6835558	6873388	ENSG00000228744	7122857	7123704	+	RPS3A pseudogene 30 [Source:HGNC Symbol;Acc:HGNC:35538]	RPS3AP30
DEFB1-1	chr8	6835558	6873388	ENSG00000230106	7170550	7170741	+	small nuclear ribonucleoprotein polypeptide C pseudogene 15 [Source:HGNC Symbol;Acc:HGNC:49830]	SNRPCP15
DEFB1-1	chr8	6835558	6873388	ENSG00000232039	7006293	7007389	-	defensin theta 1, pseudogene 2 [Source:HGNC Symbol;Acc:HGNC:33599]	DEFT1P2
DEFB1-1	chr8	6835558	6873388	ENSG00000233238	6959289	6960161	-	defensin alpha 9, pseudogene [Source:HGNC Symbol;Acc:HGNC:31800]	DEFA9P
DEFB1-1	chr8	6835558	6873388	ENSG00000233531	6968141	6969113	-	defensin alpha 10, pseudogene [Source:HGNC Symbol;Acc:HGNC:31801]	DEFA10P
DEFB1-1	chr8	6835558	6873388	ENSG00000234120	7112314	7113728	-	Ribosomal protein S24 pseudogene	AF228730.2
DEFB1-1	chr8	6835558	6873388	ENSG00000234178	7028641	7029489	-	defensin alpha 11, pseudogene [Source:HGNC Symbol;Acc:HGNC:33354]	DEFA11P
DEFB1-1	chr8	6835558	6873388	ENSG00000239839	7015869	7018301	-
DEFB1-1	chr8	6835558	6873388	ENSG00000240247	6996766	6999195	-	defensin alpha 1B [Source:HGNC Symbol;Acc:HGNC:33596]	DEFA1B
DEFB1-1	chr8	6835558	6873388	ENSG00000245857	6835554	6885276	+
DEFB1-1	chr8	6835558	6873388	ENSG00000249898	6618475	6708209	-
DEFB1-1	chr8	6835558	6873388	ENSG00000250752	6898878	6899468	-	ribosomal protein L23a pseudogene 96 [Source:HGNC Symbol;Acc:HGNC:51631]	RPL23AP96
DEFB1-1	chr8	6835558	6873388	ENSG00000254625	6928608	6930473	+	novel transcript	AF233439.1
DEFB1-1	chr8	6835558	6873388	ENSG00000254683	7143632	7143841	-	small nuclear ribonucleoprotein polypeptide C pseudogene 6 [Source:HGNC Symbol;Acc:HGNC:49821]	SNRPCP6
DEFB1-1	chr8	6835558	6873388	ENSG00000255273	7082971	7083328	+	chromosome 11 open reading frame 2 (C11orf2) pseudogene	AF238378.1
DEFB1-1	chr8	6835558	6873388	ENSG00000266038	6745164	6745244	+	microRNA 4659a [Source:HGNC Symbol;Acc:HGNC:41857]	MIR4659A
DEFB1-1	chr8	6835558	6873388	ENSG00000271743	6615604	6617198	-	novel transcript	AF287957.1
DEFB1-1	chr8	6835558	6873388	ENSG00000275591	6808517	6835644	-
DEFB1-1	chr8	6835558	6873388	ENSG00000276580	6622124	6622220	-	microRNA 8055 [Source:HGNC Symbol;Acc:HGNC:50241]	MIR8055
DEFB1-1	chr8	6835558	6873388	ENSG00000283386	6745168	6745240	-	microRNA 4659b [Source:HGNC Symbol;Acc:HGNC:41530]	MIR4659B
DIRC3-1	chr2	217223633	217309405	ENSG00000233143	217282739	217336120	+
DIRC3-1	chr2	217223633	217309405	ENSG00000251982	217251556	217251875	+	RN7SK pseudogene 43 [Source:HGNC Symbol;Acc:HGNC:45767]	RN7SKP43
DIRC3-1	chr2	217223633	217309405	ENSG00000259855	216995906	216996490	+	novel transcript	AC007749.1
DIRC3-1	chr2	217223633	217309405	ENSG00000278004	217283370	217283523	+		AC009492.1
DIRC3-1	chr2	217223633	217311312	ENSG00000233143	217282739	217336120	+
DIRC3-1	chr2	217223633	217311312	ENSG00000251982	217251556	217251875	+	RN7SK pseudogene 43 [Source:HGNC Symbol;Acc:HGNC:45767]	RN7SKP43
DIRC3-1	chr2	217223633	217311312	ENSG00000259855	216995906	216996490	+	novel transcript	AC007749.1
DIRC3-1	chr2	217223633	217311312	ENSG00000278004	217283370	217283523	+		AC009492.1
DIRC3-1	chr2	217223638	217227990	ENSG00000233143	217282739	217336120	+
DIRC3-1	chr2	217223638	217227990	ENSG00000251982	217251556	217251875	+	RN7SK pseudogene 43 [Source:HGNC Symbol;Acc:HGNC:45767]	RN7SKP43
DIRC3-1	chr2	217223638	217227990	ENSG00000259855	216995906	216996490	+	novel transcript	AC007749.1
DIRC3-1	chr2	217223638	217227990	ENSG00000278004	217283370	217283523	+		AC009492.1
DIRC3-1	chr2	217223713	217311312	ENSG00000233143	217282739	217336120	+
DIRC3-1	chr2	217223713	217311312	ENSG00000233143	217282739	217336120	+
DIRC3-1	chr2	217223713	217311312	ENSG00000251982	217251556	217251875	+	RN7SK pseudogene 43 [Source:HGNC Symbol;Acc:HGNC:45767]	RN7SKP43
DIRC3-1	chr2	217223713	217311312	ENSG00000259855	216995906	216996490	+	novel transcript	AC007749.1
DIRC3-1	chr2	217223713	217311312	ENSG00000278004	217283370	217283523	+		AC009492.1
DIRC3-1	chr2	217223713	217311312	ENSG00000278004	217283370	217283523	+		AC009492.1
DIRC3-1	chr2	217261384	217268475	ENSG00000233143	217282739	217336120	+
DIRC3-1	chr2	217261384	217268475	ENSG00000251982	217251556	217251875	+	RN7SK pseudogene 43 [Source:HGNC Symbol;Acc:HGNC:45767]	RN7SKP43
DIRC3-1	chr2	217261384	217268475	ENSG00000259855	216995906	216996490	+	novel transcript	AC007749.1
DIRC3-1	chr2	217261384	217268475	ENSG00000278004	217283370	217283523	+		AC009492.1
DIRC3-1	chr2	217277308	217344204	ENSG00000233143	217282739	217336120	+
DIRC3-1	chr2	217277308	217344204	ENSG00000251982	217251556	217251875	+	RN7SK pseudogene 43 [Source:HGNC Symbol;Acc:HGNC:45767]	RN7SKP43
DIRC3-1	chr2	217277308	217344204	ENSG00000259855	216995906	216996490	+	novel transcript	AC007749.1
DIRC3-1	chr2	217277308	217344204	ENSG00000278004	217283370	217283523	+		AC009492.1
DIRC3-1	chr2	217277980	217304026	ENSG00000233143	217282739	217336120	+
DIRC3-1	chr2	217277980	217304026	ENSG00000233143	217282739	217336120	+
DIRC3-1	chr2	217277980	217304026	ENSG00000251982	217251556	217251875	+	RN7SK pseudogene 43 [Source:HGNC Symbol;Acc:HGNC:45767]	RN7SKP43
DIRC3-1	chr2	217277980	217304026	ENSG00000259855	216995906	216996490	+	novel transcript	AC007749.1
DIRC3-1	chr2	217277980	217304026	ENSG00000278004	217283370	217283523	+		AC009492.1
DIRC3-1	chr2	217277980	217304026	ENSG00000278004	217283370	217283523	+		AC009492.1
DIRC3-1	chr2	217277980	217305445	ENSG00000233143	217282739	217336120	+
DIRC3-1	chr2	217277980	217305445	ENSG00000251982	217251556	217251875	+	RN7SK pseudogene 43 [Source:HGNC Symbol;Acc:HGNC:45767]	RN7SKP43
DIRC3-1	chr2	217277980	217305445	ENSG00000259855	216995906	216996490	+	novel transcript	AC007749.1
DIRC3-1	chr2	217277980	217305445	ENSG00000278004	217283370	217283523	+		AC009492.1
DIRC3-1	chr2	217277980	217309405	ENSG00000233143	217282739	217336120	+
DIRC3-1	chr2	217277980	217309405	ENSG00000251982	217251556	217251875	+	RN7SK pseudogene 43 [Source:HGNC Symbol;Acc:HGNC:45767]	RN7SKP43
DIRC3-1	chr2	217277980	217309405	ENSG00000259855	216995906	216996490	+	novel transcript	AC007749.1
DIRC3-1	chr2	217277980	217309405	ENSG00000278004	217283370	217283523	+		AC009492.1
DIRC3-1	chr2	217282684	217317893	ENSG00000233143	217282739	217336120	+
DIRC3-1	chr2	217282684	217317893	ENSG00000251982	217251556	217251875	+	RN7SK pseudogene 43 [Source:HGNC Symbol;Acc:HGNC:45767]	RN7SKP43
DIRC3-1	chr2	217282684	217317893	ENSG00000259855	216995906	216996490	+	novel transcript	AC007749.1
DIRC3-1	chr2	217282684	217317893	ENSG00000278004	217283370	217283523	+		AC009492.1
DOPEY2-1	chr21	36131767	36156317	ENSG00000142197	36156782	36294274	+	DOP1 leucine zipper like protein B [Source:HGNC Symbol;Acc:HGNC:1291]	DOP1B
DOPEY2-1	chr21	36131767	36156317	ENSG00000159228	36069941	36073166	+
DOPEY2-1	chr21	36131767	36156317	ENSG00000159231	36134912	36146566	+
DOPEY2-1	chr21	36131767	36156317	ENSG00000159256	36320189	36386148	+
DOPEY2-1	chr21	36131767	36156317	ENSG00000159259	36385378	36419015	+
DOPEY2-1	chr21	36131767	36156317	ENSG00000185917	36034541	36079389	-
DOPEY2-1	chr21	36131767	36156317	ENSG00000189089	36050214	36051377	+	ribosomal modification protein rimK like family member B pseudogene 1 [Source:HGNC Symbol;Acc:HGNC:34034]	RIMKLBP1
DOPEY2-1	chr21	36131767	36156317	ENSG00000200213	36066545	36066652	+	RNA, U6 small nuclear 992, pseudogene [Source:HGNC Symbol;Acc:HGNC:47955]	RNU6-992P
DOPEY2-1	chr21	36131767	36156317	ENSG00000214867	36295173	36295702	-	serine and arginine rich splicing factor 9 pseudogene 1 [Source:HGNC Symbol;Acc:HGNC:10792]	SRSF9P1
DOPEY2-1	chr21	36131767	36156317	ENSG00000214889	36132450	36133032	+	ribosomal protein S9 pseudogene 1 [Source:HGNC Symbol;Acc:HGNC:10443]	RPS9P1
DOPEY2-1	chr21	36131767	36156317	ENSG00000214914	36016079	36016546	-	ribosomal protein L23a pseudogene 3 [Source:HGNC Symbol;Acc:HGNC:10320]	RPL23AP3
DOPEY2-1	chr21	36131767	36156317	ENSG00000224421	36388878	36389112	-	ATP synthase membrane subunit f pseudogene 1 [Source:HGNC Symbol;Acc:HGNC:849]	ATP5MFP1
DOPEY2-1	chr21	36131767	36156317	ENSG00000226054	36130489	36131376	+	mediator of cell motility 1 pseudogene 1 [Source:HGNC Symbol;Acc:HGNC:23274]	MEMO1P1
DOPEY2-1	chr21	36131767	36156317	ENSG00000228107	36360630	36362040	+	novel transcript, sense overlapping MORC3	AP000692.1
DOPEY2-1	chr21	36131767	36156317	ENSG00000228149	36168970	36170180	-	ribosomal protein L3 pseudogene 1 [Source:HGNC Symbol;Acc:HGNC:10352]	RPL3P1
DOPEY2-1	chr21	36131767	36156317	ENSG00000230212	36069642	36126640	-	novel transcript	AP000688.1
DOPEY2-1	chr21	36131767	36156317	ENSG00000231106	36005338	36007838	+	long intergenic non-protein coding RNA 1436 [Source:HGNC Symbol;Acc:HGNC:50754]	LINC01436
DOPEY2-1	chr21	36131767	36156317	ENSG00000233393	36104881	36109690	+	novel transcript	AP000688.2
DOPEY2-1	chr21	36131767	36156317	ENSG00000234008	35887195	35887807	+	protein phosphatase 1 regulatory inhibitor subunit 2 pseudogene 2 [Source:HGNC Symbol;Acc:HGNC:9290]	PPP1R2P2
DOPEY2-1	chr21	36131767	36156317	ENSG00000236119	36082859	36090414	+	novel transcript	AP000688.3
DOPEY2-1	chr21	36131767	36156317	ENSG00000236677	36060432	36064408	+	SETD4 antisense RNA 1 [Source:HGNC Symbol;Acc:HGNC:40104]	SETD4-AS1
DOPEY2-1	chr21	36131767	36156317	ENSG00000236830	36131767	36175815	-
DOPEY2-1	chr21	36131767	36156317	ENSG00000273199	36319792	36320670	-	novel transcript, antisense to MORC3	AP000692.2
DOPEY2-1	chr21	36131767	36156323	ENSG00000142197	36156782	36294274	+	DOP1 leucine zipper like protein B [Source:HGNC Symbol;Acc:HGNC:1291]	DOP1B
DOPEY2-1	chr21	36131767	36156323	ENSG00000159228	36069941	36073166	+
DOPEY2-1	chr21	36131767	36156323	ENSG00000159231	36134912	36146566	+
DOPEY2-1	chr21	36131767	36156323	ENSG00000159256	36320189	36386148	+
DOPEY2-1	chr21	36131767	36156323	ENSG00000159259	36385378	36419015	+
DOPEY2-1	chr21	36131767	36156323	ENSG00000185917	36034541	36079389	-
DOPEY2-1	chr21	36131767	36156323	ENSG00000189089	36050214	36051377	+	ribosomal modification protein rimK like family member B pseudogene 1 [Source:HGNC Symbol;Acc:HGNC:34034]	RIMKLBP1
DOPEY2-1	chr21	36131767	36156323	ENSG00000200213	36066545	36066652	+	RNA, U6 small nuclear 992, pseudogene [Source:HGNC Symbol;Acc:HGNC:47955]	RNU6-992P
DOPEY2-1	chr21	36131767	36156323	ENSG00000214867	36295173	36295702	-	serine and arginine rich splicing factor 9 pseudogene 1 [Source:HGNC Symbol;Acc:HGNC:10792]	SRSF9P1
DOPEY2-1	chr21	36131767	36156323	ENSG00000214889	36132450	36133032	+	ribosomal protein S9 pseudogene 1 [Source:HGNC Symbol;Acc:HGNC:10443]	RPS9P1
DOPEY2-1	chr21	36131767	36156323	ENSG00000214914	36016079	36016546	-	ribosomal protein L23a pseudogene 3 [Source:HGNC Symbol;Acc:HGNC:10320]	RPL23AP3
DOPEY2-1	chr21	36131767	36156323	ENSG00000224421	36388878	36389112	-	ATP synthase membrane subunit f pseudogene 1 [Source:HGNC Symbol;Acc:HGNC:849]	ATP5MFP1
DOPEY2-1	chr21	36131767	36156323	ENSG00000226054	36130489	36131376	+	mediator of cell motility 1 pseudogene 1 [Source:HGNC Symbol;Acc:HGNC:23274]	MEMO1P1
DOPEY2-1	chr21	36131767	36156323	ENSG00000228107	36360630	36362040	+	novel transcript, sense overlapping MORC3	AP000692.1
DOPEY2-1	chr21	36131767	36156323	ENSG00000228149	36168970	36170180	-	ribosomal protein L3 pseudogene 1 [Source:HGNC Symbol;Acc:HGNC:10352]	RPL3P1
DOPEY2-1	chr21	36131767	36156323	ENSG00000230212	36069642	36126640	-	novel transcript	AP000688.1
DOPEY2-1	chr21	36131767	36156323	ENSG00000231106	36005338	36007838	+	long intergenic non-protein coding RNA 1436 [Source:HGNC Symbol;Acc:HGNC:50754]	LINC01436
DOPEY2-1	chr21	36131767	36156323	ENSG00000233393	36104881	36109690	+	novel transcript	AP000688.2
DOPEY2-1	chr21	36131767	36156323	ENSG00000234008	35887195	35887807	+	protein phosphatase 1 regulatory inhibitor subunit 2 pseudogene 2 [Source:HGNC Symbol;Acc:HGNC:9290]	PPP1R2P2
DOPEY2-1	chr21	36131767	36156323	ENSG00000236119	36082859	36090414	+	novel transcript	AP000688.3
DOPEY2-1	chr21	36131767	36156323	ENSG00000236677	36060432	36064408	+	SETD4 antisense RNA 1 [Source:HGNC Symbol;Acc:HGNC:40104]	SETD4-AS1
DOPEY2-1	chr21	36131767	36156323	ENSG00000236830	36131767	36175815	-
DOPEY2-1	chr21	36131767	36156323	ENSG00000273199	36319792	36320670	-	novel transcript, antisense to MORC3	AP000692.2
DOPEY2-1	chr21	36131769	36156321	ENSG00000142197	36156782	36294274	+	DOP1 leucine zipper like protein B [Source:HGNC Symbol;Acc:HGNC:1291]	DOP1B
DOPEY2-1	chr21	36131769	36156321	ENSG00000159228	36069941	36073166	+
DOPEY2-1	chr21	36131769	36156321	ENSG00000159231	36134912	36146566	+
DOPEY2-1	chr21	36131769	36156321	ENSG00000159256	36320189	36386148	+
DOPEY2-1	chr21	36131769	36156321	ENSG00000159259	36385378	36419015	+
DOPEY2-1	chr21	36131769	36156321	ENSG00000185917	36034541	36079389	-
DOPEY2-1	chr21	36131769	36156321	ENSG00000189089	36050214	36051377	+	ribosomal modification protein rimK like family member B pseudogene 1 [Source:HGNC Symbol;Acc:HGNC:34034]	RIMKLBP1
DOPEY2-1	chr21	36131769	36156321	ENSG00000200213	36066545	36066652	+	RNA, U6 small nuclear 992, pseudogene [Source:HGNC Symbol;Acc:HGNC:47955]	RNU6-992P
DOPEY2-1	chr21	36131769	36156321	ENSG00000214867	36295173	36295702	-	serine and arginine rich splicing factor 9 pseudogene 1 [Source:HGNC Symbol;Acc:HGNC:10792]	SRSF9P1
DOPEY2-1	chr21	36131769	36156321	ENSG00000214889	36132450	36133032	+	ribosomal protein S9 pseudogene 1 [Source:HGNC Symbol;Acc:HGNC:10443]	RPS9P1
DOPEY2-1	chr21	36131769	36156321	ENSG00000214914	36016079	36016546	-	ribosomal protein L23a pseudogene 3 [Source:HGNC Symbol;Acc:HGNC:10320]	RPL23AP3
DOPEY2-1	chr21	36131769	36156321	ENSG00000224421	36388878	36389112	-	ATP synthase membrane subunit f pseudogene 1 [Source:HGNC Symbol;Acc:HGNC:849]	ATP5MFP1
DOPEY2-1	chr21	36131769	36156321	ENSG00000226054	36130489	36131376	+	mediator of cell motility 1 pseudogene 1 [Source:HGNC Symbol;Acc:HGNC:23274]	MEMO1P1
DOPEY2-1	chr21	36131769	36156321	ENSG00000228107	36360630	36362040	+	novel transcript, sense overlapping MORC3	AP000692.1
DOPEY2-1	chr21	36131769	36156321	ENSG00000228149	36168970	36170180	-	ribosomal protein L3 pseudogene 1 [Source:HGNC Symbol;Acc:HGNC:10352]	RPL3P1
DOPEY2-1	chr21	36131769	36156321	ENSG00000230212	36069642	36126640	-	novel transcript	AP000688.1
DOPEY2-1	chr21	36131769	36156321	ENSG00000231106	36005338	36007838	+	long intergenic non-protein coding RNA 1436 [Source:HGNC Symbol;Acc:HGNC:50754]	LINC01436
DOPEY2-1	chr21	36131769	36156321	ENSG00000233393	36104881	36109690	+	novel transcript	AP000688.2
DOPEY2-1	chr21	36131769	36156321	ENSG00000234008	35887195	35887807	+	protein phosphatase 1 regulatory inhibitor subunit 2 pseudogene 2 [Source:HGNC Symbol;Acc:HGNC:9290]	PPP1R2P2
DOPEY2-1	chr21	36131769	36156321	ENSG00000236119	36082859	36090414	+	novel transcript	AP000688.3
DOPEY2-1	chr21	36131769	36156321	ENSG00000236677	36060432	36064408	+	SETD4 antisense RNA 1 [Source:HGNC Symbol;Acc:HGNC:40104]	SETD4-AS1
DOPEY2-1	chr21	36131769	36156321	ENSG00000236830	36131767	36175815	-
DOPEY2-1	chr21	36131769	36156321	ENSG00000273199	36319792	36320670	-	novel transcript, antisense to MORC3	AP000692.2
DOPEY2-1	chr21	36132423	36156336	ENSG00000142197	36156782	36294274	+	DOP1 leucine zipper like protein B [Source:HGNC Symbol;Acc:HGNC:1291]	DOP1B
DOPEY2-1	chr21	36132423	36156336	ENSG00000159228	36069941	36073166	+
DOPEY2-1	chr21	36132423	36156336	ENSG00000159231	36134912	36146566	+
DOPEY2-1	chr21	36132423	36156336	ENSG00000159256	36320189	36386148	+
DOPEY2-1	chr21	36132423	36156336	ENSG00000159259	36385378	36419015	+
DOPEY2-1	chr21	36132423	36156336	ENSG00000185917	36034541	36079389	-
DOPEY2-1	chr21	36132423	36156336	ENSG00000189089	36050214	36051377	+	ribosomal modification protein rimK like family member B pseudogene 1 [Source:HGNC Symbol;Acc:HGNC:34034]	RIMKLBP1
DOPEY2-1	chr21	36132423	36156336	ENSG00000200213	36066545	36066652	+	RNA, U6 small nuclear 992, pseudogene [Source:HGNC Symbol;Acc:HGNC:47955]	RNU6-992P
DOPEY2-1	chr21	36132423	36156336	ENSG00000214867	36295173	36295702	-	serine and arginine rich splicing factor 9 pseudogene 1 [Source:HGNC Symbol;Acc:HGNC:10792]	SRSF9P1
DOPEY2-1	chr21	36132423	36156336	ENSG00000214889	36132450	36133032	+	ribosomal protein S9 pseudogene 1 [Source:HGNC Symbol;Acc:HGNC:10443]	RPS9P1
DOPEY2-1	chr21	36132423	36156336	ENSG00000214914	36016079	36016546	-	ribosomal protein L23a pseudogene 3 [Source:HGNC Symbol;Acc:HGNC:10320]	RPL23AP3
DOPEY2-1	chr21	36132423	36156336	ENSG00000224421	36388878	36389112	-	ATP synthase membrane subunit f pseudogene 1 [Source:HGNC Symbol;Acc:HGNC:849]	ATP5MFP1
DOPEY2-1	chr21	36132423	36156336	ENSG00000226054	36130489	36131376	+	mediator of cell motility 1 pseudogene 1 [Source:HGNC Symbol;Acc:HGNC:23274]	MEMO1P1
DOPEY2-1	chr21	36132423	36156336	ENSG00000228107	36360630	36362040	+	novel transcript, sense overlapping MORC3	AP000692.1
DOPEY2-1	chr21	36132423	36156336	ENSG00000228149	36168970	36170180	-	ribosomal protein L3 pseudogene 1 [Source:HGNC Symbol;Acc:HGNC:10352]	RPL3P1
DOPEY2-1	chr21	36132423	36156336	ENSG00000230212	36069642	36126640	-	novel transcript	AP000688.1
DOPEY2-1	chr21	36132423	36156336	ENSG00000231106	36005338	36007838	+	long intergenic non-protein coding RNA 1436 [Source:HGNC Symbol;Acc:HGNC:50754]	LINC01436
DOPEY2-1	chr21	36132423	36156336	ENSG00000233393	36104881	36109690	+	novel transcript	AP000688.2
DOPEY2-1	chr21	36132423	36156336	ENSG00000234008	35887195	35887807	+	protein phosphatase 1 regulatory inhibitor subunit 2 pseudogene 2 [Source:HGNC Symbol;Acc:HGNC:9290]	PPP1R2P2
DOPEY2-1	chr21	36132423	36156336	ENSG00000236119	36082859	36090414	+	novel transcript	AP000688.3
DOPEY2-1	chr21	36132423	36156336	ENSG00000236677	36060432	36064408	+	SETD4 antisense RNA 1 [Source:HGNC Symbol;Acc:HGNC:40104]	SETD4-AS1
DOPEY2-1	chr21	36132423	36156336	ENSG00000236830	36131767	36175815	-
DOPEY2-1	chr21	36132423	36156336	ENSG00000273199	36319792	36320670	-	novel transcript, antisense to MORC3	AP000692.2
DOPEY2-1	chr21	36132432	36156317	ENSG00000142197	36156782	36294274	+	DOP1 leucine zipper like protein B [Source:HGNC Symbol;Acc:HGNC:1291]	DOP1B
DOPEY2-1	chr21	36132432	36156317	ENSG00000159228	36069941	36073166	+
DOPEY2-1	chr21	36132432	36156317	ENSG00000159231	36134912	36146566	+
DOPEY2-1	chr21	36132432	36156317	ENSG00000159256	36320189	36386148	+
DOPEY2-1	chr21	36132432	36156317	ENSG00000159259	36385378	36419015	+
DOPEY2-1	chr21	36132432	36156317	ENSG00000185917	36034541	36079389	-
DOPEY2-1	chr21	36132432	36156317	ENSG00000189089	36050214	36051377	+	ribosomal modification protein rimK like family member B pseudogene 1 [Source:HGNC Symbol;Acc:HGNC:34034]	RIMKLBP1
DOPEY2-1	chr21	36132432	36156317	ENSG00000200213	36066545	36066652	+	RNA, U6 small nuclear 992, pseudogene [Source:HGNC Symbol;Acc:HGNC:47955]	RNU6-992P
DOPEY2-1	chr21	36132432	36156317	ENSG00000214867	36295173	36295702	-	serine and arginine rich splicing factor 9 pseudogene 1 [Source:HGNC Symbol;Acc:HGNC:10792]	SRSF9P1
DOPEY2-1	chr21	36132432	36156317	ENSG00000214889	36132450	36133032	+	ribosomal protein S9 pseudogene 1 [Source:HGNC Symbol;Acc:HGNC:10443]	RPS9P1
DOPEY2-1	chr21	36132432	36156317	ENSG00000214914	36016079	36016546	-	ribosomal protein L23a pseudogene 3 [Source:HGNC Symbol;Acc:HGNC:10320]	RPL23AP3
DOPEY2-1	chr21	36132432	36156317	ENSG00000224421	36388878	36389112	-	ATP synthase membrane subunit f pseudogene 1 [Source:HGNC Symbol;Acc:HGNC:849]	ATP5MFP1
DOPEY2-1	chr21	36132432	36156317	ENSG00000226054	36130489	36131376	+	mediator of cell motility 1 pseudogene 1 [Source:HGNC Symbol;Acc:HGNC:23274]	MEMO1P1
DOPEY2-1	chr21	36132432	36156317	ENSG00000228107	36360630	36362040	+	novel transcript, sense overlapping MORC3	AP000692.1
DOPEY2-1	chr21	36132432	36156317	ENSG00000228149	36168970	36170180	-	ribosomal protein L3 pseudogene 1 [Source:HGNC Symbol;Acc:HGNC:10352]	RPL3P1
DOPEY2-1	chr21	36132432	36156317	ENSG00000230212	36069642	36126640	-	novel transcript	AP000688.1
DOPEY2-1	chr21	36132432	36156317	ENSG00000231106	36005338	36007838	+	long intergenic non-protein coding RNA 1436 [Source:HGNC Symbol;Acc:HGNC:50754]	LINC01436
DOPEY2-1	chr21	36132432	36156317	ENSG00000233393	36104881	36109690	+	novel transcript	AP000688.2
DOPEY2-1	chr21	36132432	36156317	ENSG00000234008	35887195	35887807	+	protein phosphatase 1 regulatory inhibitor subunit 2 pseudogene 2 [Source:HGNC Symbol;Acc:HGNC:9290]	PPP1R2P2
DOPEY2-1	chr21	36132432	36156317	ENSG00000236119	36082859	36090414	+	novel transcript	AP000688.3
DOPEY2-1	chr21	36132432	36156317	ENSG00000236677	36060432	36064408	+	SETD4 antisense RNA 1 [Source:HGNC Symbol;Acc:HGNC:40104]	SETD4-AS1
DOPEY2-1	chr21	36132432	36156317	ENSG00000236830	36131767	36175815	-
DOPEY2-1	chr21	36132432	36156317	ENSG00000273199	36319792	36320670	-	novel transcript, antisense to MORC3	AP000692.2
DOPEY2-1	chr21	36132775	36156317	ENSG00000142197	36156782	36294274	+	DOP1 leucine zipper like protein B [Source:HGNC Symbol;Acc:HGNC:1291]	DOP1B
DOPEY2-1	chr21	36132775	36156317	ENSG00000159228	36069941	36073166	+
DOPEY2-1	chr21	36132775	36156317	ENSG00000159231	36134912	36146566	+
DOPEY2-1	chr21	36132775	36156317	ENSG00000159256	36320189	36386148	+
DOPEY2-1	chr21	36132775	36156317	ENSG00000159259	36385378	36419015	+
DOPEY2-1	chr21	36132775	36156317	ENSG00000185917	36034541	36079389	-
DOPEY2-1	chr21	36132775	36156317	ENSG00000189089	36050214	36051377	+	ribosomal modification protein rimK like family member B pseudogene 1 [Source:HGNC Symbol;Acc:HGNC:34034]	RIMKLBP1
DOPEY2-1	chr21	36132775	36156317	ENSG00000200213	36066545	36066652	+	RNA, U6 small nuclear 992, pseudogene [Source:HGNC Symbol;Acc:HGNC:47955]	RNU6-992P
DOPEY2-1	chr21	36132775	36156317	ENSG00000214867	36295173	36295702	-	serine and arginine rich splicing factor 9 pseudogene 1 [Source:HGNC Symbol;Acc:HGNC:10792]	SRSF9P1
DOPEY2-1	chr21	36132775	36156317	ENSG00000214889	36132450	36133032	+	ribosomal protein S9 pseudogene 1 [Source:HGNC Symbol;Acc:HGNC:10443]	RPS9P1
DOPEY2-1	chr21	36132775	36156317	ENSG00000214914	36016079	36016546	-	ribosomal protein L23a pseudogene 3 [Source:HGNC Symbol;Acc:HGNC:10320]	RPL23AP3
DOPEY2-1	chr21	36132775	36156317	ENSG00000224421	36388878	36389112	-	ATP synthase membrane subunit f pseudogene 1 [Source:HGNC Symbol;Acc:HGNC:849]	ATP5MFP1
DOPEY2-1	chr21	36132775	36156317	ENSG00000226054	36130489	36131376	+	mediator of cell motility 1 pseudogene 1 [Source:HGNC Symbol;Acc:HGNC:23274]	MEMO1P1
DOPEY2-1	chr21	36132775	36156317	ENSG00000228107	36360630	36362040	+	novel transcript, sense overlapping MORC3	AP000692.1
DOPEY2-1	chr21	36132775	36156317	ENSG00000228149	36168970	36170180	-	ribosomal protein L3 pseudogene 1 [Source:HGNC Symbol;Acc:HGNC:10352]	RPL3P1
DOPEY2-1	chr21	36132775	36156317	ENSG00000230212	36069642	36126640	-	novel transcript	AP000688.1
DOPEY2-1	chr21	36132775	36156317	ENSG00000231106	36005338	36007838	+	long intergenic non-protein coding RNA 1436 [Source:HGNC Symbol;Acc:HGNC:50754]	LINC01436
DOPEY2-1	chr21	36132775	36156317	ENSG00000233393	36104881	36109690	+	novel transcript	AP000688.2
DOPEY2-1	chr21	36132775	36156317	ENSG00000234008	35887195	35887807	+	protein phosphatase 1 regulatory inhibitor subunit 2 pseudogene 2 [Source:HGNC Symbol;Acc:HGNC:9290]	PPP1R2P2
DOPEY2-1	chr21	36132775	36156317	ENSG00000236119	36082859	36090414	+	novel transcript	AP000688.3
DOPEY2-1	chr21	36132775	36156317	ENSG00000236677	36060432	36064408	+	SETD4 antisense RNA 1 [Source:HGNC Symbol;Acc:HGNC:40104]	SETD4-AS1
DOPEY2-1	chr21	36132775	36156317	ENSG00000236830	36131767	36175815	-
DOPEY2-1	chr21	36132775	36156317	ENSG00000273199	36319792	36320670	-	novel transcript, antisense to MORC3	AP000692.2
DOPEY2-1	chr21	36132780	36156317	ENSG00000142197	36156782	36294274	+	DOP1 leucine zipper like protein B [Source:HGNC Symbol;Acc:HGNC:1291]	DOP1B
DOPEY2-1	chr21	36132780	36156317	ENSG00000159228	36069941	36073166	+
DOPEY2-1	chr21	36132780	36156317	ENSG00000159231	36134912	36146566	+
DOPEY2-1	chr21	36132780	36156317	ENSG00000159256	36320189	36386148	+
DOPEY2-1	chr21	36132780	36156317	ENSG00000159259	36385378	36419015	+
DOPEY2-1	chr21	36132780	36156317	ENSG00000185917	36034541	36079389	-
DOPEY2-1	chr21	36132780	36156317	ENSG00000189089	36050214	36051377	+	ribosomal modification protein rimK like family member B pseudogene 1 [Source:HGNC Symbol;Acc:HGNC:34034]	RIMKLBP1
DOPEY2-1	chr21	36132780	36156317	ENSG00000200213	36066545	36066652	+	RNA, U6 small nuclear 992, pseudogene [Source:HGNC Symbol;Acc:HGNC:47955]	RNU6-992P
DOPEY2-1	chr21	36132780	36156317	ENSG00000214867	36295173	36295702	-	serine and arginine rich splicing factor 9 pseudogene 1 [Source:HGNC Symbol;Acc:HGNC:10792]	SRSF9P1
DOPEY2-1	chr21	36132780	36156317	ENSG00000214889	36132450	36133032	+	ribosomal protein S9 pseudogene 1 [Source:HGNC Symbol;Acc:HGNC:10443]	RPS9P1
DOPEY2-1	chr21	36132780	36156317	ENSG00000214914	36016079	36016546	-	ribosomal protein L23a pseudogene 3 [Source:HGNC Symbol;Acc:HGNC:10320]	RPL23AP3
DOPEY2-1	chr21	36132780	36156317	ENSG00000224421	36388878	36389112	-	ATP synthase membrane subunit f pseudogene 1 [Source:HGNC Symbol;Acc:HGNC:849]	ATP5MFP1
DOPEY2-1	chr21	36132780	36156317	ENSG00000226054	36130489	36131376	+	mediator of cell motility 1 pseudogene 1 [Source:HGNC Symbol;Acc:HGNC:23274]	MEMO1P1
DOPEY2-1	chr21	36132780	36156317	ENSG00000228107	36360630	36362040	+	novel transcript, sense overlapping MORC3	AP000692.1
DOPEY2-1	chr21	36132780	36156317	ENSG00000228149	36168970	36170180	-	ribosomal protein L3 pseudogene 1 [Source:HGNC Symbol;Acc:HGNC:10352]	RPL3P1
DOPEY2-1	chr21	36132780	36156317	ENSG00000230212	36069642	36126640	-	novel transcript	AP000688.1
DOPEY2-1	chr21	36132780	36156317	ENSG00000231106	36005338	36007838	+	long intergenic non-protein coding RNA 1436 [Source:HGNC Symbol;Acc:HGNC:50754]	LINC01436
DOPEY2-1	chr21	36132780	36156317	ENSG00000233393	36104881	36109690	+	novel transcript	AP000688.2
DOPEY2-1	chr21	36132780	36156317	ENSG00000234008	35887195	35887807	+	protein phosphatase 1 regulatory inhibitor subunit 2 pseudogene 2 [Source:HGNC Symbol;Acc:HGNC:9290]	PPP1R2P2
DOPEY2-1	chr21	36132780	36156317	ENSG00000236119	36082859	36090414	+	novel transcript	AP000688.3
DOPEY2-1	chr21	36132780	36156317	ENSG00000236677	36060432	36064408	+	SETD4 antisense RNA 1 [Source:HGNC Symbol;Acc:HGNC:40104]	SETD4-AS1
DOPEY2-1	chr21	36132780	36156317	ENSG00000236830	36131767	36175815	-
DOPEY2-1	chr21	36132780	36156317	ENSG00000273199	36319792	36320670	-	novel transcript, antisense to MORC3	AP000692.2
DOPEY2-1	chr21	36132800	36134873	ENSG00000142197	36156782	36294274	+	DOP1 leucine zipper like protein B [Source:HGNC Symbol;Acc:HGNC:1291]	DOP1B
DOPEY2-1	chr21	36132800	36134873	ENSG00000159228	36069941	36073166	+
DOPEY2-1	chr21	36132800	36134873	ENSG00000159231	36134912	36146566	+
DOPEY2-1	chr21	36132800	36134873	ENSG00000159256	36320189	36386148	+
DOPEY2-1	chr21	36132800	36134873	ENSG00000159259	36385378	36419015	+
DOPEY2-1	chr21	36132800	36134873	ENSG00000185917	36034541	36079389	-
DOPEY2-1	chr21	36132800	36134873	ENSG00000189089	36050214	36051377	+	ribosomal modification protein rimK like family member B pseudogene 1 [Source:HGNC Symbol;Acc:HGNC:34034]	RIMKLBP1
DOPEY2-1	chr21	36132800	36134873	ENSG00000200213	36066545	36066652	+	RNA, U6 small nuclear 992, pseudogene [Source:HGNC Symbol;Acc:HGNC:47955]	RNU6-992P
DOPEY2-1	chr21	36132800	36134873	ENSG00000214867	36295173	36295702	-	serine and arginine rich splicing factor 9 pseudogene 1 [Source:HGNC Symbol;Acc:HGNC:10792]	SRSF9P1
DOPEY2-1	chr21	36132800	36134873	ENSG00000214889	36132450	36133032	+	ribosomal protein S9 pseudogene 1 [Source:HGNC Symbol;Acc:HGNC:10443]	RPS9P1
DOPEY2-1	chr21	36132800	36134873	ENSG00000214914	36016079	36016546	-	ribosomal protein L23a pseudogene 3 [Source:HGNC Symbol;Acc:HGNC:10320]	RPL23AP3
DOPEY2-1	chr21	36132800	36134873	ENSG00000224421	36388878	36389112	-	ATP synthase membrane subunit f pseudogene 1 [Source:HGNC Symbol;Acc:HGNC:849]	ATP5MFP1
DOPEY2-1	chr21	36132800	36134873	ENSG00000226054	36130489	36131376	+	mediator of cell motility 1 pseudogene 1 [Source:HGNC Symbol;Acc:HGNC:23274]	MEMO1P1
DOPEY2-1	chr21	36132800	36134873	ENSG00000228107	36360630	36362040	+	novel transcript, sense overlapping MORC3	AP000692.1
DOPEY2-1	chr21	36132800	36134873	ENSG00000228149	36168970	36170180	-	ribosomal protein L3 pseudogene 1 [Source:HGNC Symbol;Acc:HGNC:10352]	RPL3P1
DOPEY2-1	chr21	36132800	36134873	ENSG00000230212	36069642	36126640	-	novel transcript	AP000688.1
DOPEY2-1	chr21	36132800	36134873	ENSG00000231106	36005338	36007838	+	long intergenic non-protein coding RNA 1436 [Source:HGNC Symbol;Acc:HGNC:50754]	LINC01436
DOPEY2-1	chr21	36132800	36134873	ENSG00000233393	36104881	36109690	+	novel transcript	AP000688.2
DOPEY2-1	chr21	36132800	36134873	ENSG00000234008	35887195	35887807	+	protein phosphatase 1 regulatory inhibitor subunit 2 pseudogene 2 [Source:HGNC Symbol;Acc:HGNC:9290]	PPP1R2P2
DOPEY2-1	chr21	36132800	36134873	ENSG00000236119	36082859	36090414	+	novel transcript	AP000688.3
DOPEY2-1	chr21	36132800	36134873	ENSG00000236677	36060432	36064408	+	SETD4 antisense RNA 1 [Source:HGNC Symbol;Acc:HGNC:40104]	SETD4-AS1
DOPEY2-1	chr21	36132800	36134873	ENSG00000236830	36131767	36175815	-
DOPEY2-1	chr21	36132800	36134873	ENSG00000273199	36319792	36320670	-	novel transcript, antisense to MORC3	AP000692.2
DOPEY2-1	chr21	36132800	36138464	ENSG00000142197	36156782	36294274	+	DOP1 leucine zipper like protein B [Source:HGNC Symbol;Acc:HGNC:1291]	DOP1B
DOPEY2-1	chr21	36132800	36138464	ENSG00000159228	36069941	36073166	+
DOPEY2-1	chr21	36132800	36138464	ENSG00000159231	36134912	36146566	+
DOPEY2-1	chr21	36132800	36138464	ENSG00000159256	36320189	36386148	+
DOPEY2-1	chr21	36132800	36138464	ENSG00000159259	36385378	36419015	+
DOPEY2-1	chr21	36132800	36138464	ENSG00000185917	36034541	36079389	-
DOPEY2-1	chr21	36132800	36138464	ENSG00000189089	36050214	36051377	+	ribosomal modification protein rimK like family member B pseudogene 1 [Source:HGNC Symbol;Acc:HGNC:34034]	RIMKLBP1
DOPEY2-1	chr21	36132800	36138464	ENSG00000200213	36066545	36066652	+	RNA, U6 small nuclear 992, pseudogene [Source:HGNC Symbol;Acc:HGNC:47955]	RNU6-992P
DOPEY2-1	chr21	36132800	36138464	ENSG00000214867	36295173	36295702	-	serine and arginine rich splicing factor 9 pseudogene 1 [Source:HGNC Symbol;Acc:HGNC:10792]	SRSF9P1
DOPEY2-1	chr21	36132800	36138464	ENSG00000214889	36132450	36133032	+	ribosomal protein S9 pseudogene 1 [Source:HGNC Symbol;Acc:HGNC:10443]	RPS9P1
DOPEY2-1	chr21	36132800	36138464	ENSG00000214914	36016079	36016546	-	ribosomal protein L23a pseudogene 3 [Source:HGNC Symbol;Acc:HGNC:10320]	RPL23AP3
DOPEY2-1	chr21	36132800	36138464	ENSG00000224421	36388878	36389112	-	ATP synthase membrane subunit f pseudogene 1 [Source:HGNC Symbol;Acc:HGNC:849]	ATP5MFP1
DOPEY2-1	chr21	36132800	36138464	ENSG00000226054	36130489	36131376	+	mediator of cell motility 1 pseudogene 1 [Source:HGNC Symbol;Acc:HGNC:23274]	MEMO1P1
DOPEY2-1	chr21	36132800	36138464	ENSG00000228107	36360630	36362040	+	novel transcript, sense overlapping MORC3	AP000692.1
DOPEY2-1	chr21	36132800	36138464	ENSG00000228149	36168970	36170180	-	ribosomal protein L3 pseudogene 1 [Source:HGNC Symbol;Acc:HGNC:10352]	RPL3P1
DOPEY2-1	chr21	36132800	36138464	ENSG00000230212	36069642	36126640	-	novel transcript	AP000688.1
DOPEY2-1	chr21	36132800	36138464	ENSG00000231106	36005338	36007838	+	long intergenic non-protein coding RNA 1436 [Source:HGNC Symbol;Acc:HGNC:50754]	LINC01436
DOPEY2-1	chr21	36132800	36138464	ENSG00000233393	36104881	36109690	+	novel transcript	AP000688.2
DOPEY2-1	chr21	36132800	36138464	ENSG00000234008	35887195	35887807	+	protein phosphatase 1 regulatory inhibitor subunit 2 pseudogene 2 [Source:HGNC Symbol;Acc:HGNC:9290]	PPP1R2P2
DOPEY2-1	chr21	36132800	36138464	ENSG00000236119	36082859	36090414	+	novel transcript	AP000688.3
DOPEY2-1	chr21	36132800	36138464	ENSG00000236677	36060432	36064408	+	SETD4 antisense RNA 1 [Source:HGNC Symbol;Acc:HGNC:40104]	SETD4-AS1
DOPEY2-1	chr21	36132800	36138464	ENSG00000236830	36131767	36175815	-
DOPEY2-1	chr21	36132800	36138464	ENSG00000273199	36319792	36320670	-	novel transcript, antisense to MORC3	AP000692.2
DOPEY2-1	chr21	36132800	36146318	ENSG00000142197	36156782	36294274	+	DOP1 leucine zipper like protein B [Source:HGNC Symbol;Acc:HGNC:1291]	DOP1B
DOPEY2-1	chr21	36132800	36146318	ENSG00000159228	36069941	36073166	+
DOPEY2-1	chr21	36132800	36146318	ENSG00000159231	36134912	36146566	+
DOPEY2-1	chr21	36132800	36146318	ENSG00000159256	36320189	36386148	+
DOPEY2-1	chr21	36132800	36146318	ENSG00000159259	36385378	36419015	+
DOPEY2-1	chr21	36132800	36146318	ENSG00000185917	36034541	36079389	-
DOPEY2-1	chr21	36132800	36146318	ENSG00000189089	36050214	36051377	+	ribosomal modification protein rimK like family member B pseudogene 1 [Source:HGNC Symbol;Acc:HGNC:34034]	RIMKLBP1
DOPEY2-1	chr21	36132800	36146318	ENSG00000200213	36066545	36066652	+	RNA, U6 small nuclear 992, pseudogene [Source:HGNC Symbol;Acc:HGNC:47955]	RNU6-992P
DOPEY2-1	chr21	36132800	36146318	ENSG00000214867	36295173	36295702	-	serine and arginine rich splicing factor 9 pseudogene 1 [Source:HGNC Symbol;Acc:HGNC:10792]	SRSF9P1
DOPEY2-1	chr21	36132800	36146318	ENSG00000214889	36132450	36133032	+	ribosomal protein S9 pseudogene 1 [Source:HGNC Symbol;Acc:HGNC:10443]	RPS9P1
DOPEY2-1	chr21	36132800	36146318	ENSG00000214914	36016079	36016546	-	ribosomal protein L23a pseudogene 3 [Source:HGNC Symbol;Acc:HGNC:10320]	RPL23AP3
DOPEY2-1	chr21	36132800	36146318	ENSG00000224421	36388878	36389112	-	ATP synthase membrane subunit f pseudogene 1 [Source:HGNC Symbol;Acc:HGNC:849]	ATP5MFP1
DOPEY2-1	chr21	36132800	36146318	ENSG00000226054	36130489	36131376	+	mediator of cell motility 1 pseudogene 1 [Source:HGNC Symbol;Acc:HGNC:23274]	MEMO1P1
DOPEY2-1	chr21	36132800	36146318	ENSG00000228107	36360630	36362040	+	novel transcript, sense overlapping MORC3	AP000692.1
DOPEY2-1	chr21	36132800	36146318	ENSG00000228149	36168970	36170180	-	ribosomal protein L3 pseudogene 1 [Source:HGNC Symbol;Acc:HGNC:10352]	RPL3P1
DOPEY2-1	chr21	36132800	36146318	ENSG00000230212	36069642	36126640	-	novel transcript	AP000688.1
DOPEY2-1	chr21	36132800	36146318	ENSG00000231106	36005338	36007838	+	long intergenic non-protein coding RNA 1436 [Source:HGNC Symbol;Acc:HGNC:50754]	LINC01436
DOPEY2-1	chr21	36132800	36146318	ENSG00000233393	36104881	36109690	+	novel transcript	AP000688.2
DOPEY2-1	chr21	36132800	36146318	ENSG00000234008	35887195	35887807	+	protein phosphatase 1 regulatory inhibitor subunit 2 pseudogene 2 [Source:HGNC Symbol;Acc:HGNC:9290]	PPP1R2P2
DOPEY2-1	chr21	36132800	36146318	ENSG00000236119	36082859	36090414	+	novel transcript	AP000688.3
DOPEY2-1	chr21	36132800	36146318	ENSG00000236677	36060432	36064408	+	SETD4 antisense RNA 1 [Source:HGNC Symbol;Acc:HGNC:40104]	SETD4-AS1
DOPEY2-1	chr21	36132800	36146318	ENSG00000236830	36131767	36175815	-
DOPEY2-1	chr21	36132800	36146318	ENSG00000273199	36319792	36320670	-	novel transcript, antisense to MORC3	AP000692.2
DOPEY2-1	chr21	36132800	36175815	ENSG00000142197	36156782	36294274	+	DOP1 leucine zipper like protein B [Source:HGNC Symbol;Acc:HGNC:1291]	DOP1B
DOPEY2-1	chr21	36132800	36175815	ENSG00000159228	36069941	36073166	+
DOPEY2-1	chr21	36132800	36175815	ENSG00000159231	36134912	36146566	+
DOPEY2-1	chr21	36132800	36175815	ENSG00000159256	36320189	36386148	+
DOPEY2-1	chr21	36132800	36175815	ENSG00000159259	36385378	36419015	+
DOPEY2-1	chr21	36132800	36175815	ENSG00000185917	36034541	36079389	-
DOPEY2-1	chr21	36132800	36175815	ENSG00000189089	36050214	36051377	+	ribosomal modification protein rimK like family member B pseudogene 1 [Source:HGNC Symbol;Acc:HGNC:34034]	RIMKLBP1
DOPEY2-1	chr21	36132800	36175815	ENSG00000200213	36066545	36066652	+	RNA, U6 small nuclear 992, pseudogene [Source:HGNC Symbol;Acc:HGNC:47955]	RNU6-992P
DOPEY2-1	chr21	36132800	36175815	ENSG00000214867	36295173	36295702	-	serine and arginine rich splicing factor 9 pseudogene 1 [Source:HGNC Symbol;Acc:HGNC:10792]	SRSF9P1
DOPEY2-1	chr21	36132800	36175815	ENSG00000214889	36132450	36133032	+	ribosomal protein S9 pseudogene 1 [Source:HGNC Symbol;Acc:HGNC:10443]	RPS9P1
DOPEY2-1	chr21	36132800	36175815	ENSG00000214914	36016079	36016546	-	ribosomal protein L23a pseudogene 3 [Source:HGNC Symbol;Acc:HGNC:10320]	RPL23AP3
DOPEY2-1	chr21	36132800	36175815	ENSG00000224421	36388878	36389112	-	ATP synthase membrane subunit f pseudogene 1 [Source:HGNC Symbol;Acc:HGNC:849]	ATP5MFP1
DOPEY2-1	chr21	36132800	36175815	ENSG00000226054	36130489	36131376	+	mediator of cell motility 1 pseudogene 1 [Source:HGNC Symbol;Acc:HGNC:23274]	MEMO1P1
DOPEY2-1	chr21	36132800	36175815	ENSG00000228107	36360630	36362040	+	novel transcript, sense overlapping MORC3	AP000692.1
DOPEY2-1	chr21	36132800	36175815	ENSG00000228149	36168970	36170180	-	ribosomal protein L3 pseudogene 1 [Source:HGNC Symbol;Acc:HGNC:10352]	RPL3P1
DOPEY2-1	chr21	36132800	36175815	ENSG00000230212	36069642	36126640	-	novel transcript	AP000688.1
DOPEY2-1	chr21	36132800	36175815	ENSG00000231106	36005338	36007838	+	long intergenic non-protein coding RNA 1436 [Source:HGNC Symbol;Acc:HGNC:50754]	LINC01436
DOPEY2-1	chr21	36132800	36175815	ENSG00000233393	36104881	36109690	+	novel transcript	AP000688.2
DOPEY2-1	chr21	36132800	36175815	ENSG00000234008	35887195	35887807	+	protein phosphatase 1 regulatory inhibitor subunit 2 pseudogene 2 [Source:HGNC Symbol;Acc:HGNC:9290]	PPP1R2P2
DOPEY2-1	chr21	36132800	36175815	ENSG00000236119	36082859	36090414	+	novel transcript	AP000688.3
DOPEY2-1	chr21	36132800	36175815	ENSG00000236677	36060432	36064408	+	SETD4 antisense RNA 1 [Source:HGNC Symbol;Acc:HGNC:40104]	SETD4-AS1
DOPEY2-1	chr21	36132800	36175815	ENSG00000236830	36131767	36175815	-
DOPEY2-1	chr21	36132800	36175815	ENSG00000273199	36319792	36320670	-	novel transcript, antisense to MORC3	AP000692.2
DOPEY2-1	chr21	36132801	36156317	ENSG00000142197	36156782	36294274	+	DOP1 leucine zipper like protein B [Source:HGNC Symbol;Acc:HGNC:1291]	DOP1B
DOPEY2-1	chr21	36132801	36156317	ENSG00000159228	36069941	36073166	+
DOPEY2-1	chr21	36132801	36156317	ENSG00000159231	36134912	36146566	+
DOPEY2-1	chr21	36132801	36156317	ENSG00000159256	36320189	36386148	+
DOPEY2-1	chr21	36132801	36156317	ENSG00000159259	36385378	36419015	+
DOPEY2-1	chr21	36132801	36156317	ENSG00000185917	36034541	36079389	-
DOPEY2-1	chr21	36132801	36156317	ENSG00000189089	36050214	36051377	+	ribosomal modification protein rimK like family member B pseudogene 1 [Source:HGNC Symbol;Acc:HGNC:34034]	RIMKLBP1
DOPEY2-1	chr21	36132801	36156317	ENSG00000200213	36066545	36066652	+	RNA, U6 small nuclear 992, pseudogene [Source:HGNC Symbol;Acc:HGNC:47955]	RNU6-992P
DOPEY2-1	chr21	36132801	36156317	ENSG00000214867	36295173	36295702	-	serine and arginine rich splicing factor 9 pseudogene 1 [Source:HGNC Symbol;Acc:HGNC:10792]	SRSF9P1
DOPEY2-1	chr21	36132801	36156317	ENSG00000214889	36132450	36133032	+	ribosomal protein S9 pseudogene 1 [Source:HGNC Symbol;Acc:HGNC:10443]	RPS9P1
DOPEY2-1	chr21	36132801	36156317	ENSG00000214914	36016079	36016546	-	ribosomal protein L23a pseudogene 3 [Source:HGNC Symbol;Acc:HGNC:10320]	RPL23AP3
DOPEY2-1	chr21	36132801	36156317	ENSG00000224421	36388878	36389112	-	ATP synthase membrane subunit f pseudogene 1 [Source:HGNC Symbol;Acc:HGNC:849]	ATP5MFP1
DOPEY2-1	chr21	36132801	36156317	ENSG00000226054	36130489	36131376	+	mediator of cell motility 1 pseudogene 1 [Source:HGNC Symbol;Acc:HGNC:23274]	MEMO1P1
DOPEY2-1	chr21	36132801	36156317	ENSG00000228107	36360630	36362040	+	novel transcript, sense overlapping MORC3	AP000692.1
DOPEY2-1	chr21	36132801	36156317	ENSG00000228149	36168970	36170180	-	ribosomal protein L3 pseudogene 1 [Source:HGNC Symbol;Acc:HGNC:10352]	RPL3P1
DOPEY2-1	chr21	36132801	36156317	ENSG00000230212	36069642	36126640	-	novel transcript	AP000688.1
DOPEY2-1	chr21	36132801	36156317	ENSG00000231106	36005338	36007838	+	long intergenic non-protein coding RNA 1436 [Source:HGNC Symbol;Acc:HGNC:50754]	LINC01436
DOPEY2-1	chr21	36132801	36156317	ENSG00000233393	36104881	36109690	+	novel transcript	AP000688.2
DOPEY2-1	chr21	36132801	36156317	ENSG00000234008	35887195	35887807	+	protein phosphatase 1 regulatory inhibitor subunit 2 pseudogene 2 [Source:HGNC Symbol;Acc:HGNC:9290]	PPP1R2P2
DOPEY2-1	chr21	36132801	36156317	ENSG00000236119	36082859	36090414	+	novel transcript	AP000688.3
DOPEY2-1	chr21	36132801	36156317	ENSG00000236677	36060432	36064408	+	SETD4 antisense RNA 1 [Source:HGNC Symbol;Acc:HGNC:40104]	SETD4-AS1
DOPEY2-1	chr21	36132801	36156317	ENSG00000236830	36131767	36175815	-
DOPEY2-1	chr21	36132801	36156317	ENSG00000273199	36319792	36320670	-	novel transcript, antisense to MORC3	AP000692.2
DOPEY2-1	chr21	36132802	36140628	ENSG00000142197	36156782	36294274	+	DOP1 leucine zipper like protein B [Source:HGNC Symbol;Acc:HGNC:1291]	DOP1B
DOPEY2-1	chr21	36132802	36140628	ENSG00000159228	36069941	36073166	+
DOPEY2-1	chr21	36132802	36140628	ENSG00000159231	36134912	36146566	+
DOPEY2-1	chr21	36132802	36140628	ENSG00000159256	36320189	36386148	+
DOPEY2-1	chr21	36132802	36140628	ENSG00000159259	36385378	36419015	+
DOPEY2-1	chr21	36132802	36140628	ENSG00000185917	36034541	36079389	-
DOPEY2-1	chr21	36132802	36140628	ENSG00000189089	36050214	36051377	+	ribosomal modification protein rimK like family member B pseudogene 1 [Source:HGNC Symbol;Acc:HGNC:34034]	RIMKLBP1
DOPEY2-1	chr21	36132802	36140628	ENSG00000200213	36066545	36066652	+	RNA, U6 small nuclear 992, pseudogene [Source:HGNC Symbol;Acc:HGNC:47955]	RNU6-992P
DOPEY2-1	chr21	36132802	36140628	ENSG00000214867	36295173	36295702	-	serine and arginine rich splicing factor 9 pseudogene 1 [Source:HGNC Symbol;Acc:HGNC:10792]	SRSF9P1
DOPEY2-1	chr21	36132802	36140628	ENSG00000214889	36132450	36133032	+	ribosomal protein S9 pseudogene 1 [Source:HGNC Symbol;Acc:HGNC:10443]	RPS9P1
DOPEY2-1	chr21	36132802	36140628	ENSG00000214914	36016079	36016546	-	ribosomal protein L23a pseudogene 3 [Source:HGNC Symbol;Acc:HGNC:10320]	RPL23AP3
DOPEY2-1	chr21	36132802	36140628	ENSG00000224421	36388878	36389112	-	ATP synthase membrane subunit f pseudogene 1 [Source:HGNC Symbol;Acc:HGNC:849]	ATP5MFP1
DOPEY2-1	chr21	36132802	36140628	ENSG00000226054	36130489	36131376	+	mediator of cell motility 1 pseudogene 1 [Source:HGNC Symbol;Acc:HGNC:23274]	MEMO1P1
DOPEY2-1	chr21	36132802	36140628	ENSG00000228107	36360630	36362040	+	novel transcript, sense overlapping MORC3	AP000692.1
DOPEY2-1	chr21	36132802	36140628	ENSG00000228149	36168970	36170180	-	ribosomal protein L3 pseudogene 1 [Source:HGNC Symbol;Acc:HGNC:10352]	RPL3P1
DOPEY2-1	chr21	36132802	36140628	ENSG00000230212	36069642	36126640	-	novel transcript	AP000688.1
DOPEY2-1	chr21	36132802	36140628	ENSG00000231106	36005338	36007838	+	long intergenic non-protein coding RNA 1436 [Source:HGNC Symbol;Acc:HGNC:50754]	LINC01436
DOPEY2-1	chr21	36132802	36140628	ENSG00000233393	36104881	36109690	+	novel transcript	AP000688.2
DOPEY2-1	chr21	36132802	36140628	ENSG00000234008	35887195	35887807	+	protein phosphatase 1 regulatory inhibitor subunit 2 pseudogene 2 [Source:HGNC Symbol;Acc:HGNC:9290]	PPP1R2P2
DOPEY2-1	chr21	36132802	36140628	ENSG00000236119	36082859	36090414	+	novel transcript	AP000688.3
DOPEY2-1	chr21	36132802	36140628	ENSG00000236677	36060432	36064408	+	SETD4 antisense RNA 1 [Source:HGNC Symbol;Acc:HGNC:40104]	SETD4-AS1
DOPEY2-1	chr21	36132802	36140628	ENSG00000236830	36131767	36175815	-
DOPEY2-1	chr21	36132802	36140628	ENSG00000273199	36319792	36320670	-	novel transcript, antisense to MORC3	AP000692.2
DOPEY2-1	chr21	36141407	36150710	ENSG00000142197	36156782	36294274	+	DOP1 leucine zipper like protein B [Source:HGNC Symbol;Acc:HGNC:1291]	DOP1B
DOPEY2-1	chr21	36141407	36150710	ENSG00000159228	36069941	36073166	+
DOPEY2-1	chr21	36141407	36150710	ENSG00000159231	36134912	36146566	+
DOPEY2-1	chr21	36141407	36150710	ENSG00000159256	36320189	36386148	+
DOPEY2-1	chr21	36141407	36150710	ENSG00000159259	36385378	36419015	+
DOPEY2-1	chr21	36141407	36150710	ENSG00000185917	36034541	36079389	-
DOPEY2-1	chr21	36141407	36150710	ENSG00000189089	36050214	36051377	+	ribosomal modification protein rimK like family member B pseudogene 1 [Source:HGNC Symbol;Acc:HGNC:34034]	RIMKLBP1
DOPEY2-1	chr21	36141407	36150710	ENSG00000200213	36066545	36066652	+	RNA, U6 small nuclear 992, pseudogene [Source:HGNC Symbol;Acc:HGNC:47955]	RNU6-992P
DOPEY2-1	chr21	36141407	36150710	ENSG00000214867	36295173	36295702	-	serine and arginine rich splicing factor 9 pseudogene 1 [Source:HGNC Symbol;Acc:HGNC:10792]	SRSF9P1
DOPEY2-1	chr21	36141407	36150710	ENSG00000214889	36132450	36133032	+	ribosomal protein S9 pseudogene 1 [Source:HGNC Symbol;Acc:HGNC:10443]	RPS9P1
DOPEY2-1	chr21	36141407	36150710	ENSG00000214914	36016079	36016546	-	ribosomal protein L23a pseudogene 3 [Source:HGNC Symbol;Acc:HGNC:10320]	RPL23AP3
DOPEY2-1	chr21	36141407	36150710	ENSG00000224421	36388878	36389112	-	ATP synthase membrane subunit f pseudogene 1 [Source:HGNC Symbol;Acc:HGNC:849]	ATP5MFP1
DOPEY2-1	chr21	36141407	36150710	ENSG00000226054	36130489	36131376	+	mediator of cell motility 1 pseudogene 1 [Source:HGNC Symbol;Acc:HGNC:23274]	MEMO1P1
DOPEY2-1	chr21	36141407	36150710	ENSG00000228107	36360630	36362040	+	novel transcript, sense overlapping MORC3	AP000692.1
DOPEY2-1	chr21	36141407	36150710	ENSG00000228149	36168970	36170180	-	ribosomal protein L3 pseudogene 1 [Source:HGNC Symbol;Acc:HGNC:10352]	RPL3P1
DOPEY2-1	chr21	36141407	36150710	ENSG00000230212	36069642	36126640	-	novel transcript	AP000688.1
DOPEY2-1	chr21	36141407	36150710	ENSG00000231106	36005338	36007838	+	long intergenic non-protein coding RNA 1436 [Source:HGNC Symbol;Acc:HGNC:50754]	LINC01436
DOPEY2-1	chr21	36141407	36150710	ENSG00000233393	36104881	36109690	+	novel transcript	AP000688.2
DOPEY2-1	chr21	36141407	36150710	ENSG00000234008	35887195	35887807	+	protein phosphatase 1 regulatory inhibitor subunit 2 pseudogene 2 [Source:HGNC Symbol;Acc:HGNC:9290]	PPP1R2P2
DOPEY2-1	chr21	36141407	36150710	ENSG00000236119	36082859	36090414	+	novel transcript	AP000688.3
DOPEY2-1	chr21	36141407	36150710	ENSG00000236677	36060432	36064408	+	SETD4 antisense RNA 1 [Source:HGNC Symbol;Acc:HGNC:40104]	SETD4-AS1
DOPEY2-1	chr21	36141407	36150710	ENSG00000236830	36131767	36175815	-
DOPEY2-1	chr21	36141407	36150710	ENSG00000273199	36319792	36320670	-	novel transcript, antisense to MORC3	AP000692.2
EIF4G2-1	chr11	10783286	10801625	ENSG00000072952	10573091	10693988	-	inositol 1,4,5-triphosphate receptor associated 1 [Source:HGNC Symbol;Acc:HGNC:7237]	IRAG1
EIF4G2-1	chr11	10783286	10801625	ENSG00000110315	10511678	10541230	-
EIF4G2-1	chr11	10783286	10801625	ENSG00000110321	10797050	10809110	-
EIF4G2-1	chr11	10783286	10801625	ENSG00000133800	10556966	10611689	-
EIF4G2-1	chr11	10783286	10801625	ENSG00000177112	10541272	10599932	+
EIF4G2-1	chr11	10783286	10801625	ENSG00000198730	10750987	10779743	+
EIF4G2-1	chr11	10783286	10801625	ENSG00000206858	10725903	10726004	+	Y RNA [Source:RFAM;Acc:RF00019]	Y_RNA
EIF4G2-1	chr11	10783286	10801625	ENSG00000236287	10812074	10858796	-
EIF4G2-1	chr11	10783286	10801625	ENSG00000238622	10801467	10801608	-	small nucleolar RNA, C/D box 97 [Source:HGNC Symbol;Acc:HGNC:32760]	SNORD97
EIF4G2-1	chr11	10783286	10801625	ENSG00000246308	10809297	10822931	+
EIF4G2-1	chr11	10783286	10801625	ENSG00000247271	10858259	10906802	+
EIF4G2-1	chr11	10783286	10801625	ENSG00000250041	10884885	10899322	-
EIF4G2-1	chr11	10783286	10801625	ENSG00000255125	10783313	10801625	+
EIF4G2-1	chr11	10783286	10801625	ENSG00000255823	10507887	10509189	-
EIF4G2-1	chr11	10783286	10801625	ENSG00000283813	10508270	10508326	-	microRNA 4485 [Source:HGNC Symbol;Acc:HGNC:41628]	MIR4485
ELMO2-2	chr20	46406787	46455687	ENSG00000062598	46366049	46432985	-
ELMO2-2	chr20	46406787	46455687	ENSG00000062598	46366049	46432985	-
ELMO2-2	chr20	46406787	46455687	ENSG00000062598	46366049	46432985	-
ELMO2-2	chr20	46406787	46455687	ENSG00000080189	46345980	46364458	-
ELMO2-2	chr20	46406787	46455687	ENSG00000080189	46345980	46364458	-
ELMO2-2	chr20	46406787	46455687	ENSG00000080189	46345980	46364458	-
ELMO2-2	chr20	46406787	46455687	ENSG00000101017	46118272	46129863	+
ELMO2-2	chr20	46406787	46455687	ENSG00000101017	46118272	46129863	+
ELMO2-2	chr20	46406787	46455687	ENSG00000101017	46118272	46129863	+
ELMO2-2	chr20	46406787	46455687	ENSG00000149635	46540946	46550574	-
ELMO2-2	chr20	46406787	46455687	ENSG00000149635	46540946	46550574	-
ELMO2-2	chr20	46406787	46455687	ENSG00000149635	46540946	46550574	-
ELMO2-2	chr20	46406787	46455687	ENSG00000149654	46173733	46308498	-
ELMO2-2	chr20	46406787	46455687	ENSG00000149654	46173733	46308498	-
ELMO2-2	chr20	46406787	46455687	ENSG00000149654	46173733	46308498	-
ELMO2-2	chr20	46406787	46455687	ENSG00000158296	46557823	46684467	-
ELMO2-2	chr20	46406787	46455687	ENSG00000158296	46557823	46684467	-
ELMO2-2	chr20	46406787	46455687	ENSG00000158296	46557823	46684467	-
ELMO2-2	chr20	46406787	46455687	ENSG00000172315	46684365	46689779	-
ELMO2-2	chr20	46406787	46455687	ENSG00000172315	46684365	46689779	-
ELMO2-2	chr20	46406787	46455687	ENSG00000172315	46684365	46689779	-
ELMO2-2	chr20	46406787	46455687	ENSG00000184617	46484461	46492640	+	zinc finger protein 840, pseudogene [Source:HGNC Symbol;Acc:HGNC:34344]	ZNF840P
ELMO2-2	chr20	46406787	46455687	ENSG00000197496	46709487	46736347	+
ELMO2-2	chr20	46406787	46455687	ENSG00000197496	46709487	46736347	+
ELMO2-2	chr20	46406787	46455687	ENSG00000197496	46709487	46736347	+
ELMO2-2	chr20	46406787	46455687	ENSG00000198185	46499630	46513559	-	zinc finger protein 334 [Source:HGNC Symbol;Acc:HGNC:15806]	ZNF334
ELMO2-2	chr20	46406787	46455687	ENSG00000215452	46414228	46459276	-	zinc finger protein 663, pseudogene [Source:HGNC Symbol;Acc:HGNC:25342]	ZNF663P
ELMO2-2	chr20	46406787	46455687	ENSG00000225849	46463719	46477232	-	makorin ring finger protein 7, pseudogene [Source:HGNC Symbol;Acc:HGNC:7119]	MKRN7P
ELMO2-2	chr20	46406787	46455687	ENSG00000229957	46168404	46171237	-	novel transcript	AL031687.1
ELMO2-2	chr20	46406787	46455687	ENSG00000271784	46689659	46690289	+	novel transcript, antisense to TP53RK	AL031055.1
ELMO2-2	chr20	46406787	46455687	ENSG00000273828	46364551	46390885	+
ELMO2-2	chr20	46406787	46455687	ENSG00000273828	46364551	46390885	+
ELMO2-2	chr20	46406787	46455687	ENSG00000273828	46364551	46390885	+
ELMO2-2	chr20	46406787	46455687	ENSG00000273893	46681676	46682375	-	novel transcript, sense intronic to SLC13A3	AL133520.1
ELMO2-2	chr20	46406787	46455687	ENSG00000283757	46455033	46496731	-	novel transcript	AL031686.1
ELMO2-2	chr20	46446420	46453602	ENSG00000062598	46366049	46432985	-
ELMO2-2	chr20	46446420	46453602	ENSG00000080189	46345980	46364458	-
ELMO2-2	chr20	46446420	46453602	ENSG00000149635	46540946	46550574	-
ELMO2-2	chr20	46446420	46453602	ENSG00000149654	46173733	46308498	-
ELMO2-2	chr20	46446420	46453602	ENSG00000158296	46557823	46684467	-
ELMO2-2	chr20	46446420	46453602	ENSG00000172315	46684365	46689779	-
ELMO2-2	chr20	46446420	46453602	ENSG00000184617	46484461	46492640	+	zinc finger protein 840, pseudogene [Source:HGNC Symbol;Acc:HGNC:34344]	ZNF840P
ELMO2-2	chr20	46446420	46453602	ENSG00000197496	46709487	46736347	+
ELMO2-2	chr20	46446420	46453602	ENSG00000198185	46499630	46513559	-	zinc finger protein 334 [Source:HGNC Symbol;Acc:HGNC:15806]	ZNF334
ELMO2-2	chr20	46446420	46453602	ENSG00000215452	46414228	46459276	-	zinc finger protein 663, pseudogene [Source:HGNC Symbol;Acc:HGNC:25342]	ZNF663P
ELMO2-2	chr20	46446420	46453602	ENSG00000225849	46463719	46477232	-	makorin ring finger protein 7, pseudogene [Source:HGNC Symbol;Acc:HGNC:7119]	MKRN7P
ELMO2-2	chr20	46446420	46453602	ENSG00000229957	46168404	46171237	-	novel transcript	AL031687.1
ELMO2-2	chr20	46446420	46453602	ENSG00000271784	46689659	46690289	+	novel transcript, antisense to TP53RK	AL031055.1
ELMO2-2	chr20	46446420	46453602	ENSG00000273828	46364551	46390885	+
ELMO2-2	chr20	46446420	46453602	ENSG00000273893	46681676	46682375	-	novel transcript, sense intronic to SLC13A3	AL133520.1
ELMO2-2	chr20	46446420	46453602	ENSG00000283757	46455033	46496731	-	novel transcript	AL031686.1
ELMO2-2	chr20	46447369	46453047	ENSG00000062598	46366049	46432985	-
ELMO2-2	chr20	46447369	46453047	ENSG00000080189	46345980	46364458	-
ELMO2-2	chr20	46447369	46453047	ENSG00000149635	46540946	46550574	-
ELMO2-2	chr20	46447369	46453047	ENSG00000149654	46173733	46308498	-
ELMO2-2	chr20	46447369	46453047	ENSG00000158296	46557823	46684467	-
ELMO2-2	chr20	46447369	46453047	ENSG00000172315	46684365	46689779	-
ELMO2-2	chr20	46447369	46453047	ENSG00000184617	46484461	46492640	+	zinc finger protein 840, pseudogene [Source:HGNC Symbol;Acc:HGNC:34344]	ZNF840P
ELMO2-2	chr20	46447369	46453047	ENSG00000197496	46709487	46736347	+
ELMO2-2	chr20	46447369	46453047	ENSG00000198185	46499630	46513559	-	zinc finger protein 334 [Source:HGNC Symbol;Acc:HGNC:15806]	ZNF334
ELMO2-2	chr20	46447369	46453047	ENSG00000215452	46414228	46459276	-	zinc finger protein 663, pseudogene [Source:HGNC Symbol;Acc:HGNC:25342]	ZNF663P
ELMO2-2	chr20	46447369	46453047	ENSG00000225849	46463719	46477232	-	makorin ring finger protein 7, pseudogene [Source:HGNC Symbol;Acc:HGNC:7119]	MKRN7P
ELMO2-2	chr20	46447369	46453047	ENSG00000229957	46168404	46171237	-	novel transcript	AL031687.1
ELMO2-2	chr20	46447369	46453047	ENSG00000271784	46689659	46690289	+	novel transcript, antisense to TP53RK	AL031055.1
ELMO2-2	chr20	46447369	46453047	ENSG00000273828	46364551	46390885	+
ELMO2-2	chr20	46447369	46453047	ENSG00000273893	46681676	46682375	-	novel transcript, sense intronic to SLC13A3	AL133520.1
ELMO2-2	chr20	46447369	46453047	ENSG00000283757	46455033	46496731	-	novel transcript	AL031686.1
EPC1-1	chr10	32266289	32269474	ENSG00000120616	32267751	32378798	-
EPC1-1	chr10	32266289	32269474	ENSG00000170759	32009010	32056431	-
EPC1-1	chr10	32266289	32269474	ENSG00000200484	32394558	32394665	-	RNA, U6 small nuclear 1244, pseudogene [Source:HGNC Symbol;Acc:HGNC:48207]	RNU6-1244P
EPC1-1	chr10	32266289	32269474	ENSG00000206660	32056746	32056839	+	Y RNA [Source:RFAM;Acc:RF00019]	Y_RNA
EPC1-1	chr10	32266289	32269474	ENSG00000217094	32188323	32188817	-	peptidylprolyl isomerase A pseudogene 31 [Source:HGNC Symbol;Acc:HGNC:44962]	PPIAP31
EPC1-1	chr10	32266289	32269474	ENSG00000226842	32281686	32282829	+	novel transcript, antisense to EPC1	AL158834.1
EPC1-1	chr10	32266289	32269474	ENSG00000227253	32266289	32269474	+	novel transcript	AL158834.2
EPC1-1	chr10	32266289	32269474	ENSG00000229327	32347397	32374488	+	novel transcript	AL391839.1
EPC1-1	chr10	32266289	32269474	ENSG00000230240	31983885	31984554	+	ribosomal protein L34 pseudogene 19 [Source:HGNC Symbol;Acc:HGNC:36925]	RPL34P19
EPC1-1	chr10	32266289	32269474	ENSG00000231245	32511336	32511737	-	C1D nuclear receptor corepressor pseudogene 1 [Source:HGNC Symbol;Acc:HGNC:31465]	C1DP1
EPC1-1	chr10	32266289	32269474	ENSG00000233190	32231849	32232245	-	ribosomal protein S24 pseudogene 13 [Source:HGNC Symbol;Acc:HGNC:36805]	RPS24P13
EPC1-1	chr10	32266289	32269474	ENSG00000233825	32346499	32347179	+	novel transcript, antisense to EPC1	AL391839.2
EPC1-1	chr10	32266289	32269474	ENSG00000234335	32102522	32103293	-	ribosomal protein S4X pseudogene 11 [Source:HGNC Symbol;Acc:HGNC:37013]	RPS4XP11
EPC1-1	chr10	32266289	32269474	ENSG00000234811	32111644	32111789	-	pseudogene similar to part of RAB18 (RAB18, member RAS oncogene family)	AL161932.1
EPC1-1	chr10	32266289	32269474	ENSG00000235113	32109861	32111666	+	part of a novel pseudogene	AL161932.2
EPC1-1	chr10	32266289	32269474	ENSG00000239731	31992087	31992381	-	RNA, 7SL, cytoplasmic 825, pseudogene [Source:HGNC Symbol;Acc:HGNC:46841]	RN7SL825P
EPC1-1	chr10	32266289	32269474	ENSG00000252482	32173684	32173744	+	RNA, U7 small nuclear 22 pseudogene [Source:HGNC Symbol;Acc:HGNC:34118]	RNU7-22P
EPC1-1	chr10	32266330	32269075	ENSG00000120616	32267751	32378798	-
EPC1-1	chr10	32266330	32269075	ENSG00000170759	32009010	32056431	-
EPC1-1	chr10	32266330	32269075	ENSG00000200484	32394558	32394665	-	RNA, U6 small nuclear 1244, pseudogene [Source:HGNC Symbol;Acc:HGNC:48207]	RNU6-1244P
EPC1-1	chr10	32266330	32269075	ENSG00000206660	32056746	32056839	+	Y RNA [Source:RFAM;Acc:RF00019]	Y_RNA
EPC1-1	chr10	32266330	32269075	ENSG00000217094	32188323	32188817	-	peptidylprolyl isomerase A pseudogene 31 [Source:HGNC Symbol;Acc:HGNC:44962]	PPIAP31
EPC1-1	chr10	32266330	32269075	ENSG00000226842	32281686	32282829	+	novel transcript, antisense to EPC1	AL158834.1
EPC1-1	chr10	32266330	32269075	ENSG00000227253	32266289	32269474	+	novel transcript	AL158834.2
EPC1-1	chr10	32266330	32269075	ENSG00000229327	32347397	32374488	+	novel transcript	AL391839.1
EPC1-1	chr10	32266330	32269075	ENSG00000230240	31983885	31984554	+	ribosomal protein L34 pseudogene 19 [Source:HGNC Symbol;Acc:HGNC:36925]	RPL34P19
EPC1-1	chr10	32266330	32269075	ENSG00000231245	32511336	32511737	-	C1D nuclear receptor corepressor pseudogene 1 [Source:HGNC Symbol;Acc:HGNC:31465]	C1DP1
EPC1-1	chr10	32266330	32269075	ENSG00000233190	32231849	32232245	-	ribosomal protein S24 pseudogene 13 [Source:HGNC Symbol;Acc:HGNC:36805]	RPS24P13
EPC1-1	chr10	32266330	32269075	ENSG00000233825	32346499	32347179	+	novel transcript, antisense to EPC1	AL391839.2
EPC1-1	chr10	32266330	32269075	ENSG00000234335	32102522	32103293	-	ribosomal protein S4X pseudogene 11 [Source:HGNC Symbol;Acc:HGNC:37013]	RPS4XP11
EPC1-1	chr10	32266330	32269075	ENSG00000234811	32111644	32111789	-	pseudogene similar to part of RAB18 (RAB18, member RAS oncogene family)	AL161932.1
EPC1-1	chr10	32266330	32269075	ENSG00000235113	32109861	32111666	+	part of a novel pseudogene	AL161932.2
EPC1-1	chr10	32266330	32269075	ENSG00000239731	31992087	31992381	-	RNA, 7SL, cytoplasmic 825, pseudogene [Source:HGNC Symbol;Acc:HGNC:46841]	RN7SL825P
EPC1-1	chr10	32266330	32269075	ENSG00000252482	32173684	32173744	+	RNA, U7 small nuclear 22 pseudogene [Source:HGNC Symbol;Acc:HGNC:34118]	RNU7-22P
FOXP1-AS-3	chr3	71289757	71310767	ENSG00000221264	71541970	71542089	-	microRNA 1284 [Source:HGNC Symbol;Acc:HGNC:35362]	MIR1284
FOXP1-AS-3	chr3	71289757	71310767	ENSG00000242094	71570255	71574457	-	FOXP1 intronic transcript 1 [Source:HGNC Symbol;Acc:HGNC:41335]	FOXP1-IT1
FOXP1-AS-3	chr3	71289757	71310767	ENSG00000244203	71289769	71305853	+	FOXP1 antisense RNA 1 [Source:HGNC Symbol;Acc:HGNC:41942]	FOXP1-AS1
FOXP1-AS-3	chr3	71289757	71310767	ENSG00000270562	71584943	71587409	+	novel transcript	AC097634.1
FOXP1-AS-3	chr3	71289757	71310767	ENSG00000274387	71567863	71571112	+	novel transcript, antisense to FOXP1	AC097634.2
FOXP1-AS-3	chr3	71289757	71310767	ENSG00000277539	71276087	71289616	-
FOXP1-AS-3	chr3	71289757	71310767	ENSG00000277539	71276087	71289616	-
FOXP1-AS-3	chr3	71289758	71305854	ENSG00000221264	71541970	71542089	-	microRNA 1284 [Source:HGNC Symbol;Acc:HGNC:35362]	MIR1284
FOXP1-AS-3	chr3	71289758	71305854	ENSG00000242094	71570255	71574457	-	FOXP1 intronic transcript 1 [Source:HGNC Symbol;Acc:HGNC:41335]	FOXP1-IT1
FOXP1-AS-3	chr3	71289758	71305854	ENSG00000244203	71289769	71305853	+	FOXP1 antisense RNA 1 [Source:HGNC Symbol;Acc:HGNC:41942]	FOXP1-AS1
FOXP1-AS-3	chr3	71289758	71305854	ENSG00000270562	71584943	71587409	+	novel transcript	AC097634.1
FOXP1-AS-3	chr3	71289758	71305854	ENSG00000274387	71567863	71571112	+	novel transcript, antisense to FOXP1	AC097634.2
FOXP1-AS-3	chr3	71289758	71305854	ENSG00000277539	71276087	71289616	-
FOXP1-AS-3	chr3	71296270	71306227	ENSG00000221264	71541970	71542089	-	microRNA 1284 [Source:HGNC Symbol;Acc:HGNC:35362]	MIR1284
FOXP1-AS-3	chr3	71296270	71306227	ENSG00000242094	71570255	71574457	-	FOXP1 intronic transcript 1 [Source:HGNC Symbol;Acc:HGNC:41335]	FOXP1-IT1
FOXP1-AS-3	chr3	71296270	71306227	ENSG00000244203	71289769	71305853	+	FOXP1 antisense RNA 1 [Source:HGNC Symbol;Acc:HGNC:41942]	FOXP1-AS1
FOXP1-AS-3	chr3	71296270	71306227	ENSG00000270562	71584943	71587409	+	novel transcript	AC097634.1
FOXP1-AS-3	chr3	71296270	71306227	ENSG00000274387	71567863	71571112	+	novel transcript, antisense to FOXP1	AC097634.2
FOXP1-AS-3	chr3	71296270	71306227	ENSG00000277539	71276087	71289616	-
FRY-1	chr13	32255554	32261813	ENSG00000073910	32031300	32299122	+
FRY-1	chr13	32255554	32261813	ENSG00000139597	32400723	32428311	-
FRY-1	chr13	32255554	32261813	ENSG00000139618	32315474	32400266	+
FRY-1	chr13	32255554	32261813	ENSG00000189167	32303700	32315344	-
FRY-1	chr13	32255554	32261813	ENSG00000212293	32420390	32420516	-		AL137247.1
FRY-1	chr13	32255554	32261813	ENSG00000215515	32384660	32386108	+	interferon induced protein with tetratricopeptide repeats 1 pseudogene 1 [Source:HGNC Symbol;Acc:HGNC:5408]	IFIT1P1
FRY-1	chr13	32255554	32261813	ENSG00000229800	32477274	32478841	+	ATPase phospholipid transporting 8A2 pseudogene 2 [Source:HGNC Symbol;Acc:HGNC:39663]	ATP8A2P2
FRY-1	chr13	32255554	32261813	ENSG00000235822	31985685	31990997	+
FRY-1	chr13	32255554	32261813	ENSG00000237637	32025314	32031639	-	FRY antisense RNA 1 [Source:HGNC Symbol;Acc:HGNC:39725]	FRY-AS1
FRY-1	chr13	32255554	32261813	ENSG00000244754	32432417	32538885	-
FRY-1	chr13	32255554	32261813	ENSG00000270008	32425358	32432954	-	novel transcript	AL137247.2
FRY-1	chr13	32255554	32261813	ENSG00000278732	31975167	31975448	+	Metazoan signal recognition particle RNA [Source:RFAM;Acc:RF00017]	Metazoa_SRP
FRY-1	chr13	32255554	32261813	ENSG00000279314	31960325	31961946	-	TEC	AC002525.1
FRY-1	chr13	32255554	32261813	ENSG00000281026	32504506	32509395	-	N4BPL2 intronic transcript 2 [Source:HGNC Symbol;Acc:HGNC:25038]	N4BP2L2-IT2
GALNT3-1	chr2	165794661	165810010	ENSG00000115339	165747591	165794682	-
GALNT3-1	chr2	165794661	165810010	ENSG00000123607	165857475	165953843	-
GALNT3-1	chr2	165794661	165810010	ENSG00000224490	165933857	165949891	+	TTC21B antisense RNA 1 [Source:HGNC Symbol;Acc:HGNC:41115]	TTC21B-AS1
GALNT3-1	chr2	165794661	165810010	ENSG00000229195	165794857	165846091	-	novel transcript	AC009495.1
GALNT3-1	chr2	165794661	165810010	ENSG00000232411	165833048	165839098	-	novel transcript	AC009495.2
GALNT3-1	chr2	165794661	165810010	ENSG00000235192	165794851	165810010	+	novel transcript	AC009495.3
GALNT3-1	chr2	165794824	165798770	ENSG00000115339	165747591	165794682	-
GALNT3-1	chr2	165794824	165798770	ENSG00000123607	165857475	165953843	-
GALNT3-1	chr2	165794824	165798770	ENSG00000224490	165933857	165949891	+	TTC21B antisense RNA 1 [Source:HGNC Symbol;Acc:HGNC:41115]	TTC21B-AS1
GALNT3-1	chr2	165794824	165798770	ENSG00000229195	165794857	165846091	-	novel transcript	AC009495.1
GALNT3-1	chr2	165794824	165798770	ENSG00000232411	165833048	165839098	-	novel transcript	AC009495.2
GALNT3-1	chr2	165794824	165798770	ENSG00000235192	165794851	165810010	+	novel transcript	AC009495.3
GALNT3-1	chr2	165794824	165811778	ENSG00000115339	165747591	165794682	-
GALNT3-1	chr2	165794824	165811778	ENSG00000123607	165857475	165953843	-
GALNT3-1	chr2	165794824	165811778	ENSG00000224490	165933857	165949891	+	TTC21B antisense RNA 1 [Source:HGNC Symbol;Acc:HGNC:41115]	TTC21B-AS1
GALNT3-1	chr2	165794824	165811778	ENSG00000229195	165794857	165846091	-	novel transcript	AC009495.1
GALNT3-1	chr2	165794824	165811778	ENSG00000232411	165833048	165839098	-	novel transcript	AC009495.2
GALNT3-1	chr2	165794824	165811778	ENSG00000235192	165794851	165810010	+	novel transcript	AC009495.3
GALNT3-1	chr2	165794824	165816431	ENSG00000115339	165747591	165794682	-
GALNT3-1	chr2	165794824	165816431	ENSG00000115339	165747591	165794682	-
GALNT3-1	chr2	165794824	165816431	ENSG00000123607	165857475	165953843	-
GALNT3-1	chr2	165794824	165816431	ENSG00000123607	165857475	165953843	-
GALNT3-1	chr2	165794824	165816431	ENSG00000224490	165933857	165949891	+	TTC21B antisense RNA 1 [Source:HGNC Symbol;Acc:HGNC:41115]	TTC21B-AS1
GALNT3-1	chr2	165794824	165816431	ENSG00000229195	165794857	165846091	-	novel transcript	AC009495.1
GALNT3-1	chr2	165794824	165816431	ENSG00000232411	165833048	165839098	-	novel transcript	AC009495.2
GALNT3-1	chr2	165794824	165816431	ENSG00000235192	165794851	165810010	+	novel transcript	AC009495.3
GPAT4-1	chr8	41533044	41578421	ENSG00000104332	41261958	41309497	-
GPAT4-1	chr8	41533044	41578421	ENSG00000147533	41490396	41510980	+
GPAT4-1	chr8	41533044	41578421	ENSG00000147536	41529206	41545046	+
GPAT4-1	chr8	41533044	41578421	ENSG00000158669	41577187	41625001	+	glycerol-3-phosphate acyltransferase 4 [Source:HGNC Symbol;Acc:HGNC:20880]	GPAT4
GPAT4-1	chr8	41533044	41578421	ENSG00000165066	41645178	41650669	-
GPAT4-1	chr8	41533044	41578421	ENSG00000206852	41298163	41298265	+	RNA, U6 small nuclear 895, pseudogene [Source:HGNC Symbol;Acc:HGNC:47858]	RNU6-895P
GPAT4-1	chr8	41533044	41578421	ENSG00000207101	41803349	41803450	+	Y RNA [Source:RFAM;Acc:RF00019]	Y_RNA
GPAT4-1	chr8	41533044	41578421	ENSG00000238936	41426655	41426727	+	small nucleolar RNA, C/D box 65B [Source:HGNC Symbol;Acc:HGNC:52231]	SNORD65B
GPAT4-1	chr8	41533044	41578421	ENSG00000239281	41271431	41271566	+	ribosomal protein S29 pseudogene 2 [Source:HGNC Symbol;Acc:HGNC:31083]	RPS29P2
GPAT4-1	chr8	41533044	41578421	ENSG00000241834	41840059	41840339	-	RNA, 7SL, cytoplasmic 149, pseudogene [Source:HGNC Symbol;Acc:HGNC:46165]	RN7SL149P
GPAT4-1	chr8	41533044	41578421	ENSG00000253133	41534155	41578368	-
[truncated: 11,363 more rows]

## Sheet: control-48hpi
lnc_gene	lnc_chromosome	lnc_start	lnc_end	GeneStableID_x	gene_start	gene_end	e	GeneDescription	GeneName
[truncated: 9,147 more rows]

[truncated: 4 more sheets: control-72hpi, hpi4-hpi24, hpi24-hpi48, hpi48-hpi72]
